# Supplementary material
Source: publisher figshare collection journal article supplement (https://acs.figshare.com/ndownloader/files/21814485)
Supplement: Supplementary file 1 [file 21814485]

## Sheet: SI2 Table 1 Hatcher
SI2 Table 1: Proteomic Data
Hatcher
Accession Number (protein ID)	GO molecular function	GO biological process	Molecular function	Molecular Weight	T-Test (p-value): (p < 0.05)	Fold change (log 2)	Quantitative Profile
EPlTAEP00000010072 (+1)	electron transfer activity Source: InterPro	photosynthesis	pep:novel chromosome:IWGSC1.0+popseq:Pt:73054:73578:1 gene:EPlTAEG00000010072 transcript:EPlTAET00000010072 description:"Cytochrome b6-f complex subunit 4"	19 kDa	1	0	[]
Traes_1AL_11FF51731.1	oxidoreductase activity, acting on a sulfur group of donors, disulfide as acceptor Source: TAIR protein disulfide oxidoreductase activity Source: GO_Central protein-disulfide reductase activity Source: GO_Central thioredoxin-disulfide reductase activity	cell redox homeostasis Source: GO_Central cellular response to oxidative stress Source: GO_Central defense response to fungus Source: TAIR glycerol ether metabolic process Source: InterPro response to cadmium ion Source: TAIR response to microbial phytotoxin Source: TAIR response to oxidative stress	pep:novel chromosome:IWGSC1.0+popseq:1A:227383515:227385539:1 gene:Traes_1AL_11FF51731 transcript:Traes_1AL_11FF51731.1 description:"Thioredoxin H-type "	14 kDa	1	0	[]
Traes_1AL_1DD0385D1.2 (+2)	protein self-association	viral replication complex formation and maintenance	pep:novel chromosome:IWGSC1.0+popseq:1A:33780091:33791511:-1 gene:Traes_1AL_1DD0385D1 transcript:Traes_1AL_1DD0385D1.2	31 kDa	1	0	[]
Traes_1AL_2F1278623.1	bacterial sigma factor activity Source: TAIR DNA binding Source: UniProtKB-KW DNA binding transcription factor activity Source: InterPro DNA-directed 5'-3' RNA polymerase activity Source: TAIR plastid sigma factor activity	cellular response to light stimulus Source: UniProtKB DNA-templated transcription, initiation Source: UniProtKB regulation of RNA biosynthetic process	pep:novel chromosome:IWGSC1.0+popseq:1A:244410638:244413598:1 gene:Traes_1AL_2F1278623 transcript:Traes_1AL_2F1278623.1	64 kDa	1	0	[]
Traes_1AL_36143CEB9.2	mRNA binding Source: TAIR structural constituent of ribosome	cytoplasmic translation	pep:novel scaffold:IWGSC1.0+popseq:IWGSC_CSS_1AL_scaff_3905139:650:5064:1 gene:Traes_1AL_36143CEB9 transcript:Traes_1AL_36143CEB9.2	47 kDa	1	0	[]
Traes_1AL_48AA3F720.1	GTPase activity Source: InterPro GTP binding	protein transport	pep:novel chromosome:IWGSC1.0+popseq:1A:232673490:232675800:-1 gene:Traes_1AL_48AA3F720 transcript:Traes_1AL_48AA3F720.1	23 kDa	1	0	[]
Traes_1AL_4905637FC.1 (+2)	ATP binding Source: UniProtKB-KW protein binding involved in protein folding Source: GO_Central unfolded protein binding	de novo' protein folding Source: GO_Central chaperone-mediated protein folding Source: GO_Central protein import into mitochondrial intermembrane space Source: GO_Central protein refolding Source: InterPro response to cadmium ion	pep:novel chromosome:IWGSC1.0+popseq:1A:231946705:231951283:1 gene:Traes_1AL_4905637FC transcript:Traes_1AL_4905637FC.1 description:"heat shock protein 60-3A"	46 kDa	1	0	[]
Traes_1AL_59F1198AB.2 (+2)	transmembrane transporter activity		pep:novel scaffold:IWGSC1.0+popseq:IWGSC_CSS_1AL_scaff_3915078:1:2079:1 gene:Traes_1AL_59F1198AB transcript:Traes_1AL_59F1198AB.2	23 kDa	1	0	[]
Traes_1AL_5B82FC66C.1 (+1)	RNA binding	gynoecium development Source: TAIR mRNA transcription Source: UniProtKB negative regulation of long-day photoperiodism, flowering Source: UniProtKB negative regulation of short-day photoperiodism, flowering Source: UniProtKB regulation of transcription, DNA-templated Source: UniProtKB-KW RNA processing Source: UniProtKB shoot system development	pep:novel chromosome:IWGSC1.0+popseq:1A:200649215:200653850:1 gene:Traes_1AL_5B82FC66C transcript:Traes_1AL_5B82FC66C.1	48 kDa	1	0	[]
Traes_1AL_5EE5C4D0C.2	?	?	pep:novel chromosome:IWGSC1.0+popseq:1A:190968451:190992826:1 gene:Traes_1AL_5EE5C4D0C transcript:Traes_1AL_5EE5C4D0C.2	302 kDa	1	0	[]
Traes_1AL_678C70D74.1	heme binding Source: InterPro metal ion binding Source: UniProtKB-KW peroxidase activity	hydrogen peroxide catabolic process Source: UniProtKB-KW plant-type cell wall organization Source: GO_Central response to oxidative stress	pep:novel chromosome:IWGSC1.0+popseq:1A:221472270:221473075:1 gene:Traes_1AL_678C70D74 transcript:Traes_1AL_678C70D74.1	20 kDa	1	0	[]
Traes_1AL_78178EEB7.2	?	?	pep:novel chromosome:IWGSC1.0+popseq:1A:224120425:224124989:-1 gene:Traes_1AL_78178EEB7 transcript:Traes_1AL_78178EEB7.2	37 kDa	1	0	[]
Traes_1AL_78C449772.1	endonuclease activity Source: GO_Central RNA binding Source: GO_Central zinc ion binding	RNA modification	pep:novel chromosome:IWGSC1.0+popseq:1A:225207239:225209301:1 gene:Traes_1AL_78C449772 transcript:Traes_1AL_78C449772.1	50 kDa	1	0	[]
Traes_1AL_82AAF3E95.1	?	?	pep:novel chromosome:IWGSC1.0+popseq:1A:93557133:93558390:1 gene:Traes_1AL_82AAF3E95 transcript:Traes_1AL_82AAF3E95.1	24 kDa	1	0	[]
Traes_1AL_8446A8622.2	?	?	pep:novel chromosome:IWGSC1.0+popseq:1A:195394227:195395763:-1 gene:Traes_1AL_8446A8622 transcript:Traes_1AL_8446A8622.2	25 kDa	1	0	[]
Traes_1AL_A0B81FF76.1	heme binding Source: InterPro identical protein binding Source: TAIR iron ion binding Source: InterPro monooxygenase activity Source: TAIR oxidoreductase activity, acting on paired donors, with incorporation or reduction of molecular oxygen, NAD(P)H as one donor, and incorporation of one atom of oxygen Source: GO_Central p-coumarate 3-hydroxylase activity	coumarin biosynthetic process Source: TAIR flavonoid biosynthetic process Source: TAIR lignin biosynthetic process Source: TAIR phenylpropanoid biosynthetic process	pep:novel chromosome:IWGSC1.0+popseq:1A:221195655:221199909:1 gene:Traes_1AL_A0B81FF76 transcript:Traes_1AL_A0B81FF76.1	38 kDa	1	0	[]
Traes_1AL_A456409C8.1	DNA binding	mRNA transcription Source: UniProtKB multicellular organism development Source: UniProtKB-KW post-embryonic plant morphogenesis Source: UniProtKB regulation of transcription, DNA-templated Source: UniProtKB-KW response to light stimulus	pep:novel chromosome:IWGSC1.0+popseq:1A:194663422:194665704:-1 gene:Traes_1AL_A456409C8 transcript:Traes_1AL_A456409C8.1	30 kDa	1	0	[]
Traes_1AL_BEE495457.2 (+1)	acetyl-CoA C-acyltransferase activity	oxylipin biosynthetic process	pep:novel chromosome:IWGSC1.0+popseq:1A:64410483:64412234:-1 gene:Traes_1AL_BEE495457 transcript:Traes_1AL_BEE495457.2	25 kDa	1	0	[]
Traes_1AL_BFC1FF7AE.1 (+2)	ATP binding Source: UniProtKB-KW ubiquitin protein ligase activity Source: GO_Central ubiquitin protein ligase binding Source: GO_Central ubiquitin-protein transferase activity	protein polyubiquitination Source: GO_Central ubiquitin-dependent protein catabolic process	pep:novel chromosome:IWGSC1.0+popseq:1A:211949226:211952410:-1 gene:Traes_1AL_BFC1FF7AE transcript:Traes_1AL_BFC1FF7AE.1	19 kDa	1	0	[]
Traes_1AL_C05349EA91.2	?	?	pep:novel chromosome:IWGSC1.0+popseq:1A:33426733:33427395:-1 gene:Traes_1AL_C05349EA91 transcript:Traes_1AL_C05349EA91.2	18 kDa	1	0	[]
Traes_1AL_C2F333604.2	ATP binding Source: UniProtKB-KW DNA helicase activity	DNA recombination Source: UniProtKB-KW DNA repair Source: UniProtKB-KW telomere maintenance	pep:novel chromosome:IWGSC1.0+popseq:1A:232786478:232791155:1 gene:Traes_1AL_C2F333604 transcript:Traes_1AL_C2F333604.2	160 kDa	1	0	[]
Traes_1AL_C446C730C.1		amyloplast organization Source: TAIR cell division Source: TAIR early endosome to late endosome transport Source: GO_Central embryo development ending in seed dormancy Source: TAIR embryonic axis specification Source: UniProtKB endocytosis Source: TAIR endosome organization Source: TAIR late endosome to vacuole transport Source: UniProtKB negative gravitropism Source: TAIR phototropism Source: Un…	pep:novel chromosome:IWGSC1.0+popseq:1A:68971301:68992197:1 gene:Traes_1AL_C446C730C transcript:Traes_1AL_C446C730C.1 description:"DNAJ heat shock N-terminal domain-containing protein"	296 kDa	1	0	[]
Traes_1AL_C8971FBEE.1	translation initiation factor activity		pep:novel chromosome:IWGSC1.0+popseq:1A:237707882:237710280:1 gene:Traes_1AL_C8971FBEE transcript:Traes_1AL_C8971FBEE.1	66 kDa	1	0	[]
Traes_1AL_D74509506.2	?	?	pep:novel chromosome:IWGSC1.0+popseq:1A:192169836:192174260:-1 gene:Traes_1AL_D74509506 transcript:Traes_1AL_D74509506.2	72 kDa	1	0	[]
Traes_1AL_D8FE82B94.1	GTPase activity Source: InterPro GTP binding		pep:novel chromosome:IWGSC1.0+popseq:1A:239360178:239364672:-1 gene:Traes_1AL_D8FE82B94 transcript:Traes_1AL_D8FE82B94.1	90 kDa	1	0	[]
Traes_1AL_D933CF49C.2	ATPase activity Source: TAIR ATP binding Source: UniProtKB-KW ATP-dependent RNA helicase activity Source: TAIR double-stranded DNA binding Source: TAIR double-stranded RNA binding Source: TAIR single-stranded DNA binding	cellular response to DNA damage stimulus Source: GO_Central mRNA export from nucleus Source: GO_Central mRNA splicing, via spliceosome Source: GO_Central regulation of gene expression Source: GO_Central response to cadmium ion Source: TAIR RNA secondary structure unwinding	pep:novel chromosome:IWGSC1.0+popseq:1A:247396429:247400227:1 gene:Traes_1AL_D933CF49C transcript:Traes_1AL_D933CF49C.2	52 kDa	1	0	[]
Traes_1AL_DDC13A76D.1		plant-type cell wall loosening Source: TAIR sexual reproduction Source: InterPro unidimensional cell growth	pep:novel chromosome:IWGSC1.0+popseq:1A:189937469:189939296:-1 gene:Traes_1AL_DDC13A76D transcript:Traes_1AL_DDC13A76D.1	29 kDa	1	0	[]
Traes_1AL_EB198861F.1	lipid binding	cell cycle Source: UniProtKB-KW cell division	Ortholog: Sec14p-like phosphatidylinositol transfer family protein; FUNCTIONS IN: transporter activity; INVOLVED IN: transport	35 kDa	1	0	[]
Traes_1AS_1A8023A17.1	aspartic-type endopeptidase activity Source: GO_Central endopeptidase activity	lipid metabolic process Source: InterPro protein catabolic process Source: GO_Central proteolysis Source: TAIR response to cytokinin Source: TAIR response to salt stress	pep:novel chromosome:IWGSC1.0+popseq:1A:118588625:118592987:-1 gene:Traes_1AS_1A8023A17 transcript:Traes_1AS_1A8023A17.1	54 kDa	1	0	[]
Traes_1AS_53CDC5AC0.2	cysteine-type endopeptidase activity	programmed cell death involved in cell development Source: TAIR proteolysis involved in cellular protein catabolic process	pep:novel chromosome:IWGSC1.0+popseq:1A:3644497:3645906:1 gene:Traes_1AS_53CDC5AC0 transcript:Traes_1AS_53CDC5AC0.2	39 kDa	1	0	[]
Traes_1AS_5C9586342.2	FMN binding Source: GO_Central NAD(P)H dehydrogenase (quinone) activity		pep:novel chromosome:IWGSC1.0+popseq:1A:152523642:152526519:1 gene:Traes_1AS_5C9586342 transcript:Traes_1AS_5C9586342.2 description:"Quinone reductase family protein"	26 kDa	1	0	[]
Traes_1AS_C70D49E2E.4 (+2)	heme binding Source: InterPro metal ion binding Source: UniProtKB-KW peroxidase activity	hydrogen peroxide catabolic process Source: UniProtKB-KW plant-type cell wall organization Source: GO_Central response to oxidative stress	pep:novel chromosome:IWGSC1.0+popseq:1A:126411310:126416149:-1 gene:Traes_1AS_C70D49E2E transcript:Traes_1AS_C70D49E2E.4	38 kDa	1	0	[]
Traes_1AS_E14F4EB86.1	ATP binding		pep:novel chromosome:IWGSC1.0+popseq:1A:104442430:104444264:-1 gene:Traes_1AS_E14F4EB86 transcript:Traes_1AS_E14F4EB86.1	43 kDa	1	0	[]
Traes_1AS_EB6754AA5.2	?	?	pep:novel chromosome:IWGSC1.0+popseq:1A:13389312:13392263:-1 gene:Traes_1AS_EB6754AA5 transcript:Traes_1AS_EB6754AA5.2	47 kDa	1	0	[]
Traes_1BL_0302D9F63.1	ATP binding Source: UniProtKB-KW hydrolase activity Source: UniProtKB-KW metal ion binding	protein transport Source: UniProtKB-KW vesicle-mediated transport	pep:novel chromosome:IWGSC1.0+popseq:1B:251615565:251622602:-1 gene:Traes_1BL_0302D9F63 transcript:Traes_1BL_0302D9F63.1 description:"AAA-type ATPase family protein"	79 kDa	1	0	[]
Traes_1BL_0F2EF5BC6.1	unfolded protein binding	protein folding	pep:novel chromosome:IWGSC1.0+popseq:1B:280873514:280875330:-1 gene:Traes_1BL_0F2EF5BC6 transcript:Traes_1BL_0F2EF5BC6.1	20 kDa	1	0	[]
Traes_1BL_56BFDECCE.1	4 iron, 4 sulfur cluster binding Source: UniProtKB-KW DNA binding Source: GO_Central DNA-directed DNA polymerase activity Source: GO_Central nucleotide binding Source: InterPro single-stranded DNA 3'-5' exodeoxyribonuclease activity Source: GO_Central zinc ion binding	base-excision repair, gap-filling Source: GO_Central DNA replication proofreading Source: GO_Central embryonic root morphogenesis Source: TAIR leading strand elongation Source: GO_Central mitotic cell cycle Source: GO_Central negative regulation of long-day photoperiodism, flowering Source: TAIR nucleotide-excision repair, DNA gap filling Source: GO_Central regulation of cell division	pep:novel chromosome:IWGSC1.0+popseq:1B:50500998:50521010:1 gene:Traes_1BL_56BFDECCE transcript:Traes_1BL_56BFDECCE.1	195 kDa	1	0	[]
Traes_1BL_5AD66D520.2	?	?	pep:novel chromosome:IWGSC1.0+popseq:1B:230478717:230482341:-1 gene:Traes_1BL_5AD66D520 transcript:Traes_1BL_5AD66D520.2	99 kDa	1	0	[]
Traes_1BL_5AF393C4F.1	kinase activity Source: UniProtKB-KW phosphotransferase activity, alcohol group as acceptor		pep:novel chromosome:IWGSC1.0+popseq:1B:31141946:31146628:1 gene:Traes_1BL_5AF393C4F transcript:Traes_1BL_5AF393C4F.1	39 kDa	1	0	[]
Traes_1BL_82E7CB0D1.1	daphnetin 3-O-glucosyltransferase activity Source: UniProtKB-EC flavonol 3-O-glucosyltransferase activity Source: UniProtKB-EC myricetin 3-O-glucosyltransferase activity Source: UniProtKB-EC quercetin 3-O-glucosyltransferase activity Source: TAIR quercetin 7-O-glucosyltransferase activity Source: TAIR UDP-glucosyltransferase activity	metabolic process	pep:novel scaffold:IWGSC1.0+popseq:IWGSC_CSS_1BL_scaff_3854941:1:883:1 gene:Traes_1BL_82E7CB0D1 transcript:Traes_1BL_82E7CB0D1.1	23 kDa	1	0	[]
Traes_1BL_877026EB5.1 (+5)	DNA binding Source: UniProtKB-KW protein heterodimerization activity		pep:novel chromosome:IWGSC1.0+popseq:1B:264695175:264695750:-1 gene:Traes_1BL_877026EB5 transcript:Traes_1BL_877026EB5.1	7 kDa	1	0	[]
Traes_1BL_AAC4D956E.2	ATP binding Source: UniProtKB-KW kinase activity Source: UniProtKB-KW metal ion binding Source: UniProtKB-KW pyruvate, phosphate dikinase activity	photosynthesis Source: UniProtKB-KW pyruvate metabolic process	pep:novel chromosome:IWGSC1.0+popseq:1B:214799055:214803197:1 gene:Traes_1BL_AAC4D956E transcript:Traes_1BL_AAC4D956E.2	45 kDa	1	0	[]
Traes_1BL_BA8741A3E.1	heme binding Source: InterPro metal ion binding	oxidation-reduction process	pep:novel chromosome:IWGSC1.0+popseq:1B:149497356:149499607:-1 gene:Traes_1BL_BA8741A3E transcript:Traes_1BL_BA8741A3E.1	23 kDa	1	0	[]
Traes_1BL_C5CD09285.1	ATP binding Source: UniProtKB-KW kinase activity Source: UniProtKB MAP kinase activity Source: TAIR protein kinase activity	cortical microtubule organization Source: UniProtKB cytokinesis by cell plate formation Source: UniProtKB hyperosmotic response Source: TAIR hypotonic salinity response Source: TAIR jasmonic acid and ethylene-dependent systemic resistance Source: TAIR jasmonic acid and ethylene-dependent systemic resistance, jasmonic acid mediated signaling pathway Source: TAIR male meiosis cytokinesis Source: TA…	pep:novel chromosome:IWGSC1.0+popseq:1B:170819774:170823637:-1 gene:Traes_1BL_C5CD09285 transcript:Traes_1BL_C5CD09285.1	43 kDa	1	0	[]
Traes_1BL_D2AEF1364.1	ADP binding Source: InterPro ATP binding Source: UniProtKB-KW protein self-association	defense response Source: GO_Central defense response to Gram-negative bacterium Source: TAIR signal transduction	pep:novel chromosome:IWGSC1.0+popseq:1B:214111295:214115139:-1 gene:Traes_1BL_D2AEF1364 transcript:Traes_1BL_D2AEF1364.1	105 kDa	1	0	[]
Traes_1BL_DCFB989E4.2	enzyme regulator activity	proteasome-mediated ubiquitin-dependent protein catabolic process Source: GO_Central regulation of protein catabolic process	pep:novel chromosome:IWGSC1.0+popseq:1B:258054825:258059025:-1 gene:Traes_1BL_DCFB989E4 transcript:Traes_1BL_DCFB989E4.2	106 kDa	1	0	[]
Traes_1BL_DD7D021A7.2	metal ion binding		pep:novel chromosome:IWGSC1.0+popseq:1B:266752564:266759248:-1 gene:Traes_1BL_DD7D021A7 transcript:Traes_1BL_DD7D021A7.2	114 kDa	1	0	[]
Traes_1BL_EE4652640.1	hydrolase activity, hydrolyzing O-glycosyl compounds Source: InterPro xyloglucan:xyloglucosyl transferase activity	cell wall biogenesis Source: InterPro cell wall organization Source: UniProtKB-KW xyloglucan metabolic process	pep:novel chromosome:IWGSC1.0+popseq:1B:281881069:281882302:-1 gene:Traes_1BL_EE4652640 transcript:Traes_1BL_EE4652640.1	23 kDa	1	0	[]
Traes_1BL_EE81995CA.1	endopeptidase activator activity Source: GO_Central proteasome binding Source: GO_Central ubiquitin binding	ubiquitin-dependent protein catabolic process	pep:novel scaffold:IWGSC1.0+popseq:IWGSC_CSS_1BL_scaff_3833717:6550:12545:-1 gene:Traes_1BL_EE81995CA transcript:Traes_1BL_EE81995CA.1 description:"regulatory particle non-ATPase 13"	34 kDa	1	0	[]
Traes_1BL_F0FD9500F.2	serine-type endopeptidase activity		pep:novel chromosome:IWGSC1.0+popseq:1B:283392559:283396212:-1 gene:Traes_1BL_F0FD9500F transcript:Traes_1BL_F0FD9500F.2	68 kDa	1	0	[]
Traes_1BS_2E766829E.1	heme binding Source: InterPro metal ion binding Source: UniProtKB-KW peroxidase activity	hydrogen peroxide catabolic process Source: InterPro plant-type cell wall organization Source: GO_Central response to oxidative stress	pep:novel chromosome:IWGSC1.0+popseq:1B:113513451:113517489:1 gene:Traes_1BS_2E766829E transcript:Traes_1BS_2E766829E.1	37 kDa	1	0	[]
Traes_1BS_5F20EB7DD.1	?	?	pep:novel chromosome:IWGSC1.0+popseq:1B:111075159:111080676:1 gene:Traes_1BS_5F20EB7DD transcript:Traes_1BS_5F20EB7DD.1	50 kDa	1	0	[]
Traes_1BS_93AC3CEE1.1	ADP binding	defense response Source: UniProtKB-KW signal transduction	pep:novel chromosome:IWGSC1.0+popseq:1B:57159577:57162047:1 gene:Traes_1BS_93AC3CEE1 transcript:Traes_1BS_93AC3CEE1.1	35 kDa	1	0	[]
Traes_1BS_D3007A1BA.1	?	?	pep:novel chromosome:IWGSC1.0+popseq:1B:10164007:10165782:1 gene:Traes_1BS_D3007A1BA transcript:Traes_1BS_D3007A1BA.1	7 kDa	1	0	[]
Traes_1BS_EF18712AB.1	N-acyltransferase activity		pep:novel chromosome:IWGSC1.0+popseq:1B:116434556:116436969:1 gene:Traes_1BS_EF18712AB transcript:Traes_1BS_EF18712AB.1	19 kDa	1	0	[]
Traes_1DL_291C515F3.1	Atg8 ligase activity	autophagosome assembly Source: GO_Central autophagy of mitochondrion Source: GO_Central autophagy of nucleus Source: GO_Central protein transport	pep:novel chromosome:IWGSC1.0+popseq:1D:80442641:80446516:-1 gene:Traes_1DL_291C515F3 transcript:Traes_1DL_291C515F3.1	40 kDa	1	0	[]
Traes_1DL_391AD5E34.1	?	?	pep:novel chromosome:IWGSC1.0+popseq:1D:31462704:31464928:-1 gene:Traes_1DL_391AD5E34 transcript:Traes_1DL_391AD5E34.1	33 kDa	1	0	[]
Traes_1DL_3A63240351.1	ATPase activity Source: InterPro ATP binding Source: UniProtKB-KW transporter activity		pep:novel scaffold:IWGSC1.0+popseq:IWGSC_CSS_1DL_scaff_2281264:10067:12135:-1 gene:Traes_1DL_3A63240351 transcript:Traes_1DL_3A63240351.1	47 kDa	1	0	[]
Traes_1DL_3F4A8E2D6.1		chloroplast organization Source: TAIR protein import into chloroplast stroma	pep:novel chromosome:IWGSC1.0+popseq:1D:62573221:62578921:-1 gene:Traes_1DL_3F4A8E2D6 transcript:Traes_1DL_3F4A8E2D6.1	25 kDa	1	0	[]
Traes_1DL_440290AF1.2	actin binding		pep:novel scaffold:IWGSC1.0+popseq:IWGSC_CSS_1DL_scaff_2279606:475:9227:1 gene:Traes_1DL_440290AF1 transcript:Traes_1DL_440290AF1.2	210 kDa	1	0	[]
Traes_1DL_48ECCF94D.2	carbohydrate binding Source: InterPro hydrolase activity, hydrolyzing O-glycosyl compounds	carbohydrate metabolic process	pep:novel scaffold:IWGSC1.0+popseq:IWGSC_CSS_1DL_scaff_2227367:1262:11436:-1 gene:Traes_1DL_48ECCF94D transcript:Traes_1DL_48ECCF94D.2	66 kDa	1	0	[]
Traes_1DL_4A0C06C2F.2	raffinose alpha-galactosidase activity	carbohydrate metabolic process Source: InterPro cell wall organization	pep:novel scaffold:IWGSC1.0+popseq:IWGSC_CSS_1DL_scaff_2289277:3:1663:1 gene:Traes_1DL_4A0C06C2F transcript:Traes_1DL_4A0C06C2F.2	28 kDa	1	0	[]
Traes_1DL_5AE278890.3	ATP binding Source: TAIR cobalt ion binding Source: TAIR malate dehydrogenase (decarboxylating) (NAD+) activity Source: TAIR NAD binding Source: InterPro protein homodimerization activity Source: TAIR zinc ion binding	malate metabolic process Source: TAIR pyruvate metabolic process	pep:novel scaffold:IWGSC1.0+popseq:IWGSC_CSS_1DL_scaff_2244669:1:5552:1 gene:Traes_1DL_5AE278890 transcript:Traes_1DL_5AE278890.3 description:"NAD-dependent malic enzyme 2"	50 kDa	1	0	[]
Traes_1DL_A1E16EA09.1		protein transport Source: UniProtKB-KW retrograde vesicle-mediated transport, Golgi to ER	pep:novel chromosome:IWGSC1.0+popseq:1D:81969086:81975655:1 gene:Traes_1DL_A1E16EA09 transcript:Traes_1DL_A1E16EA09.1	57 kDa	1	0	[]
Traes_1DS_366988061.2	oxidoreductase activity, acting on a sulfur group of donors, disulfide as acceptor	cell redox homeostasis	pep:novel scaffold:IWGSC1.0+popseq:IWGSC_CSS_1DS_scaff_1901456:2841:7373:-1 gene:Traes_1DS_366988061 transcript:Traes_1DS_366988061.2 description:"atypical CYS HIS rich thioredoxin 2"	23 kDa	1	0	[]
Traes_1DS_543CC7DC9.1	DNA binding transcription factor activity Source: TAIR sequence-specific DNA binding	meristem maintenance	pep:novel scaffold:IWGSC1.0+popseq:IWGSC_CSS_1DS_scaff_1881313:3807:9829:1 gene:Traes_1DS_543CC7DC9 transcript:Traes_1DS_543CC7DC9.1	33 kDa	1	0	[]
Traes_1DS_54B3EABE1.1	ATP binding		pep:novel chromosome:IWGSC1.0+popseq:1D:64888524:64893802:1 gene:Traes_1DS_54B3EABE1 transcript:Traes_1DS_54B3EABE1.1	93 kDa	1	0	[]
Traes_1DS_7915A546F.1	DNA binding		pep:novel scaffold:IWGSC1.0+popseq:IWGSC_CSS_1DS_scaff_1894414:552:8088:-1 gene:Traes_1DS_7915A546F transcript:Traes_1DS_7915A546F.1	83 kDa	1	0	[]
Traes_1DS_87CA06255.2	6-phosphofructo-2-kinase activity Source: UniProtKB-EC ATP binding Source: UniProtKB-KW fructose-2,6-bisphosphate 2-phosphatase activity Source: UniProtKB-EC starch binding	fructose 2,6-bisphosphate metabolic process Source: UniProtKB fructose 6-phosphate metabolic process Source: UniProtKB fructose metabolic process Source: UniProtKB regulation of carbon utilization	pep:novel chromosome:IWGSC1.0+popseq:1D:54817814:54827665:1 gene:Traes_1DS_87CA06255 transcript:Traes_1DS_87CA06255.2 description:"fructose-2,6-bisphosphatase"	86 kDa	1	0	[]
Traes_1DS_BA6EE3AED.1	mRNA binding Source: TAIR structural constituent of ribosome	cytoplasmic translation Source: GO_Central ribosomal small subunit biogenesis Source: GO_Central rRNA processing	pep:novel chromosome:IWGSC1.0+popseq:1D:35791295:35793279:-1 gene:Traes_1DS_BA6EE3AED transcript:Traes_1DS_BA6EE3AED.1	27 kDa	1	0	[]
Traes_2AL_0ADBF3D27.1 (+1)	enzyme activator activity Source: UniProtKB oxidoreductase activity, acting on a sulfur group of donors, disulfide as acceptor Source: TAIR protein disulfide oxidoreductase activity Source: GO_Central protein-disulfide reductase activity Source: GO_Central thioredoxin-disulfide reductase activity	cell redox homeostasis Source: GO_Central cellular response to oxidative stress Source: GO_Central glycerol ether metabolic process Source: InterPro positive regulation of catalytic activity	pep:novel scaffold:IWGSC1.0+popseq:IWGSC_CSS_2AL_scaff_3976621:534:3449:1 gene:Traes_2AL_0ADBF3D27 transcript:Traes_2AL_0ADBF3D27.1	13 kDa	1	0	[]
Traes_2AL_1AE31EB64.2 (+1)	chitin binding Source: TAIR ribonuclease activity	defense response to bacterium Source: InterPro defense response to fungus, incompatible interaction Source: TAIR killing of cells of other organism Source: UniProtKB-KW response to ethylene Source: TAIR response to herbivore Source: TAIR response to salt stress Source: TAIR response to virus Source: TAIR systemic acquired resistance	pep:novel chromosome:IWGSC1.0+popseq:2A:247596745:247597249:-1 gene:Traes_2AL_1AE31EB64 transcript:Traes_2AL_1AE31EB64.2	13 kDa	1	0	[]
Traes_2AL_2C88A7A3A.2	ADP binding Source: InterPro ATP binding	plant-type hypersensitive response Source: GO_Central signal transduction	pep:novel scaffold:IWGSC1.0+popseq:IWGSC_CSS_2AL_scaff_6326755:1161:5940:-1 gene:Traes_2AL_2C88A7A3A transcript:Traes_2AL_2C88A7A3A.2	167 kDa	1	0	[]
Traes_2AL_2D4100475.1	DNA binding transcription factor activity Source: TAIR RNA polymerase II transcription factor activity, sequence-specific DNA binding Source: GO_Central sequence-specific DNA binding Source: GO_Central transcription factor activity, RNA polymerase II transcription factor recruiting Source: GO_Central transcription regulatory region DNA binding	cell differentiation Source: GO_Central regulation of transcription by RNA polymerase II	pep:novel chromosome:IWGSC1.0+popseq:2A:199059897:199062753:1 gene:Traes_2AL_2D4100475 transcript:Traes_2AL_2D4100475.1	31 kDa	1	0	[]
Traes_2AL_3315250C9.2	adenosylhomocysteinase activity Source: TAIR copper ion binding Source: TAIR NAD binding	embryo development ending in seed dormancy Source: TAIR methylation-dependent chromatin silencing Source: TAIR one-carbon metabolic process Source: UniProtKB-KW posttranscriptional gene silencing Source: TAIR S-adenosylhomocysteine catabolic process Source: InterPro S-adenosylmethionine cycle	pep:novel scaffold:IWGSC1.0+popseq:IWGSC_CSS_2AL_scaff_6403902:1:1740:-1 gene:Traes_2AL_3315250C9 transcript:Traes_2AL_3315250C9.2	39 kDa	1	0	[]
Traes_2AL_5D3FC9DDB.2	mRNA binding	defense response to virus Source: TAIR response to abscisic acid	pep:novel chromosome:IWGSC1.0+popseq:2A:81275677:81285718:1 gene:Traes_2AL_5D3FC9DDB transcript:Traes_2AL_5D3FC9DDB.2 description:"GYF domain-containing protein"	185 kDa	1	0	[]
Traes_2AL_608FCBC83.1	NAD binding Source: InterPro phosphoglycerate dehydrogenase activity	L-serine biosynthetic process	pep:novel chromosome:IWGSC1.0+popseq:2A:239587639:239589746:-1 gene:Traes_2AL_608FCBC83 transcript:Traes_2AL_608FCBC83.1	40 kDa	1	0	[]
Traes_2AL_67970C350.2 (+1)	mRNA binding Source: TAIR poly(A) binding Source: UniProtKB RNA binding	mRNA processing Source: UniProtKB-KW response to cytokinin Source: TAIR response to ozone	pep:novel chromosome:IWGSC1.0+popseq:2A:227471211:227473919:1 gene:Traes_2AL_67970C350 transcript:Traes_2AL_67970C350.2	37 kDa	1	0	[]
Traes_2AL_71D9D4D71.1 (+1)		defense response Source: InterPro response to biotic stimulus	pep:novel scaffold:IWGSC1.0+popseq:IWGSC_CSS_2AL_scaff_6439352:4953:5994:-1 gene:Traes_2AL_71D9D4D71 transcript:Traes_2AL_71D9D4D71.1	17 kDa	1	0	[]
Traes_2AL_77C7CBB4E.1	anion transmembrane transporter activity Source: UniProtKB protein kinase binding Source: UniProtKB protein phosphatase binding Source: UniProtKB voltage-gated anion channel activity	abscisic acid-activated signaling pathway Source: UniProtKB-KW anion transport Source: TAIR cellular ion homeostasis Source: TAIR inorganic anion transport Source: UniProtKB multicellular organismal water homeostasis Source: TAIR organic anion transport Source: UniProtKB regulation of stomatal opening Source: TAIR response to abscisic acid Source: TAIR response to carbon dioxide Source: TAIR resp…	pep:novel chromosome:IWGSC1.0+popseq:2A:212280787:212284167:1 gene:Traes_2AL_77C7CBB4E transcript:Traes_2AL_77C7CBB4E.1 description:"C4-dicarboxylate transporter/malic acid transport protein"	63 kDa	1	0	[]
Traes_2AL_8E8343BA5.1 (+1)	sucrose synthase activity	callose deposition in phloem sieve plate Source: TAIR sucrose metabolic process	pep:novel scaffold:IWGSC1.0+popseq:IWGSC_CSS_2AL_scaff_6333913:395:4875:-1 gene:Traes_2AL_8E8343BA5 transcript:Traes_2AL_8E8343BA5.1	99 kDa	1	0	[]
Traes_2AL_A296CFC08.1		ubiquitin-dependent protein catabolic process	pep:novel chromosome:IWGSC1.0+popseq:2A:205083091:205088443:1 gene:Traes_2AL_A296CFC08 transcript:Traes_2AL_A296CFC08.1	35 kDa	1	0	[]
Traes_2AL_A47310DDA.1 (+2)	GTPase activity Source: InterPro GTP binding	ER to Golgi vesicle-mediated transport Source: TAIR protein transport Source: UniProtKB-KW regulation of endocytosis	pep:novel chromosome:IWGSC1.0+popseq:2A:103143564:103146461:1 gene:Traes_2AL_A47310DDA transcript:Traes_2AL_A47310DDA.1 description:"RAB GTPase homolog B1C"	23 kDa	1	0	[]
Traes_2AL_B50371043.1 (+2)	mRNA binding Source: TAIR translation initiation factor activity	nuclear-transcribed mRNA catabolic process, nonsense-mediated decay Source: UniProtKB-KW regulation of nuclear-transcribed mRNA catabolic process, deadenylation-dependent decay Source: UniProtKB regulation of nuclear-transcribed mRNA poly(A) tail shortening Source: UniProtKB regulation of translational initiation Source: UniProtKB response to salt stress Source: TAIR translational initiation Sour…	pep:novel chromosome:IWGSC1.0+popseq:2A:32109005:32112947:-1 gene:Traes_2AL_B50371043 transcript:Traes_2AL_B50371043.1	63 kDa	1	0	[]
Traes_2AL_C2D10BD07.1	ATP binding Source: UniProtKB-KW identical protein binding Source: UniProtKB S-methyl-5-thioribose kinase activity	cellular response to ethylene stimulus Source: TAIR cellular response to iron ion Source: TAIR cellular response to nitric oxide Source: TAIR L-methionine salvage from methylthioadenosine	pep:novel scaffold:IWGSC1.0+popseq:IWGSC_CSS_2AL_scaff_6348091:12209:15266:-1 gene:Traes_2AL_C2D10BD07 transcript:Traes_2AL_C2D10BD07.1 description:"S-methyl-5-thioribose kinase"	57 kDa	1	0	[]
Traes_2AL_C2F94CD5F.1	copper ion binding Source: TAIR methylmalonate-semialdehyde dehydrogenase (acylating) activity	response to oxidative stress	pep:novel scaffold:IWGSC1.0+popseq:IWGSC_CSS_2AL_scaff_1272612:1630:6548:1 gene:Traes_2AL_C2F94CD5F transcript:Traes_2AL_C2F94CD5F.1	42 kDa	1	0	[]
Traes_2AL_C54414D9D.1 (+1)	?	?	pep:novel scaffold:IWGSC1.0+popseq:IWGSC_CSS_2AL_scaff_6416455:91:1390:-1 gene:Traes_2AL_C54414D9D transcript:Traes_2AL_C54414D9D.1	23 kDa	1	0	[]
Traes_2AL_D0D84176E.1	copper ion binding Source: TAIR metal ion binding Source: TAIR superoxide dismutase activity	defense response to bacterium Source: TAIR embryo development ending in seed dormancy Source: TAIR response to salt stress Source: TAIR response to zinc ion	pep:novel scaffold:IWGSC1.0+popseq:IWGSC_CSS_2AL_scaff_6329982:2929:8053:-1 gene:Traes_2AL_D0D84176E transcript:Traes_2AL_D0D84176E.1	25 kDa	1	0	[]
Traes_2AL_D80447132.2	DNA binding Source: UniProtKB-KW DNA polymerase processivity factor activity	leading strand elongation Source: GO_Central mismatch repair Source: GO_Central regulation of cell cycle Source: TAIR regulation of DNA replication Source: InterPro translesion synthesis	pep:novel chromosome:IWGSC1.0+popseq:2A:224227388:224230136:1 gene:Traes_2AL_D80447132 transcript:Traes_2AL_D80447132.2 description:"DC1 domain-containing protein"	65 kDa	1	0	[]
Traes_2AL_DD284DEA9.1	mRNA binding Source: TAIR ubiquitin protein ligase binding Source: UniProtKB water channel activity	hydrogen peroxide transmembrane transport Source: TAIR ion transmembrane transport Source: GO_Central response to abscisic acid Source: TAIR response to water deprivation Source: TAIR water transport	pep:novel chromosome:IWGSC1.0+popseq:2A:210148187:210150910:1 gene:Traes_2AL_DD284DEA9 transcript:Traes_2AL_DD284DEA9.1	30 kDa	1	0	[]
Traes_2AL_DE4FA1957.1	adenosylhomocysteinase activity Source: GO_Central NAD binding	one-carbon metabolic process Source: UniProtKB-KW S-adenosylhomocysteine catabolic process Source: InterPro S-adenosylmethionine cycle	pep:novel chromosome:IWGSC1.0+popseq:2A:235540974:235541836:-1 gene:Traes_2AL_DE4FA1957 transcript:Traes_2AL_DE4FA1957.1	17 kDa	1	0	[]
Traes_2AL_E6C281385.1 (+1)	ATP binding Source: UniProtKB-KW kinase activity Source: TAIR mRNA binding Source: TAIR protein serine/threonine kinase activity	intracellular signal transduction Source: GO_Central protein phosphorylation Source: GO_Central response to osmotic stress Source: TAIR response to salt stress	pep:novel chromosome:IWGSC1.0+popseq:2A:43304302:43309373:1 gene:Traes_2AL_E6C281385 transcript:Traes_2AL_E6C281385.1	41 kDa	1	0	[]
Traes_2AS_1B8504694.2 (+1)	aldose 1-epimerase activity Source: GO_Central carbohydrate binding	galactose catabolic process via UDP-galactose Source: GO_Central glucose metabolic process	pep:novel chromosome:IWGSC1.0+popseq:2A:150616919:150620005:1 gene:Traes_2AS_1B8504694 transcript:Traes_2AS_1B8504694.2	36 kDa	1	0	[]
Traes_2AS_28AE2B07E.1 (+2)	?	?	pep:novel chromosome:IWGSC1.0+popseq:2A:35922384:35925560:-1 gene:Traes_2AS_28AE2B07E transcript:Traes_2AS_28AE2B07E.1	10 kDa	1	0	[]
Traes_2AS_4AE8164A8.1	ATP binding Source: UniProtKB-KW ATP-dependent RNA helicase activity Source: GO_Central RNA binding	defense response to fungus, incompatible interaction Source: TAIR embryo development ending in seed dormancy Source: TAIR gene expression Source: UniProtKB mRNA splicing, via spliceosome Source: UniProtKB positive regulation of RNA splicing Source: UniProtKB primary miRNA processing Source: TAIR regulation of transcription, DNA-templated Source: UniProtKB-KW RNA interference Source: UniProtKB RNA…	pep:novel chromosome:IWGSC1.0+popseq:2A:116180504:116188219:1 gene:Traes_2AS_4AE8164A8 transcript:Traes_2AS_4AE8164A8.1	142 kDa	1	0	[]
Traes_2AS_67EFE0FAE.1	ATP binding Source: UniProtKB-KW unfolded protein binding	chaperone-mediated protein folding Source: UniProtKB defense response to bacterium, incompatible interaction	pep:novel chromosome:IWGSC1.0+popseq:2A:7473395:7476767:1 gene:Traes_2AS_67EFE0FAE transcript:Traes_2AS_67EFE0FAE.1 description:"heat shock protein 90.1"	94 kDa	1	0	[]
Traes_2AS_6AFBC4C3F.1	oxidoreductase activity		pep:novel scaffold:IWGSC1.0+popseq:IWGSC_CSS_2AS_scaff_5154042:1996:2786:1 gene:Traes_2AS_6AFBC4C3F transcript:Traes_2AS_6AFBC4C3F.1	10 kDa	1	0	[]
Traes_2AS_76163A005.1 (+3)	mRNA binding Source: TAIR RNA binding Source: GO_Central structural constituent of ribosome	cytoplasmic translation	pep:novel chromosome:IWGSC1.0+popseq:2A:176303553:176305445:1 gene:Traes_2AS_76163A005 transcript:Traes_2AS_76163A005.1	24 kDa	1	0	[]
Traes_2AS_7B0F31404.1 (+2)	cobalt ion binding Source: TAIR NADH dehydrogenase (ubiquinone) activity	cold acclimation Source: TAIR electron transport chain Source: InterPro response to osmotic stress	pep:novel chromosome:IWGSC1.0+popseq:2A:185646087:185652619:1 gene:Traes_2AS_7B0F31404 transcript:Traes_2AS_7B0F31404.1 description:"NADH-ubiquinone oxidoreductase-related"	23 kDa	1	0	[]
Traes_2AS_8B481894D.1		histone H3-K9 methylation Source: TAIR regulation of epidermal cell division Source: TAIR root hair cell differentiation Source: TAIR trichome differentiation	pep:novel chromosome:IWGSC1.0+popseq:2A:196835919:196837855:-1 gene:Traes_2AS_8B481894D transcript:Traes_2AS_8B481894D.1	25 kDa	1	0	[]
Traes_2AS_B52F26066.1	3-deoxy-7-phosphoheptulonate synthase activity	aromatic amino acid family biosynthetic process Source: UniProtKB-KW chorismate biosynthetic process	pep:novel scaffold:IWGSC1.0+popseq:IWGSC_CSS_2AS_scaff_2418291:1:278:1 gene:Traes_2AS_B52F26066 transcript:Traes_2AS_B52F26066.1	10 kDa	1	0	[]
Traes_2AS_BDB406ADE.1	4-alpha-glucanotransferase activity Source: TAIR beta-maltose 4-alpha-glucanotransferase activity Source: UniProtKB-EC heteropolysaccharide binding Source: TAIR starch binding	maltose catabolic process Source: TAIR maltose metabolic process Source: TAIR polysaccharide metabolic process Source: TAIR starch catabolic process	pep:novel chromosome:IWGSC1.0+popseq:2A:139705024:139713875:1 gene:Traes_2AS_BDB406ADE transcript:Traes_2AS_BDB406ADE.1 description:"disproportionating enzyme 2"	105 kDa	1	0	[]
Traes_2AS_E1DD8FB4D.1	heme binding Source: InterPro iron ion binding Source: InterPro methyltransferase activity Source: UniProtKB-KW sterol 14-demethylase activity	sterol biosynthetic process	pep:novel chromosome:IWGSC1.0+popseq:2A:194022:195764:-1 gene:Traes_2AS_E1DD8FB4D transcript:Traes_2AS_E1DD8FB4D.1	55 kDa	1	0	[]
Traes_2AS_EA89CC3DF.3	histone methyltransferase activity (H3-K4 specific) Source: TAIR zinc ion binding	anther development Source: TAIR carotenoid metabolic process Source: TAIR embryo sac development Source: TAIR histone H3-K36 methylation Source: TAIR negative regulation of flower development Source: TAIR plant ovule development Source: TAIR pollen development Source: TAIR positive regulation of histone methylation Source: TAIR regulation of gene expression, epigenetic Source: TAIR regulation of …	pep:novel chromosome:IWGSC1.0+popseq:2A:356963:371979:-1 gene:Traes_2AS_EA89CC3DF transcript:Traes_2AS_EA89CC3DF.3	199 kDa	1	0	[]
Traes_2AS_EF55AF9DD.1 (+1)	dihydrolipoyllysine-residue succinyltransferase activity Source: UniProtKB-EC zinc ion binding	L-lysine catabolic process to acetyl-CoA via saccharopine Source: UniProtKB-UniPathway response to oxidative stress Source: TAIR tricarboxylic acid cycle	Ortholog: Dihydrolipoamide succinyltransferase; FUNCTIONS IN: zinc ion binding, acyltransferase activity; INVOLVED IN: response to oxidative stress, metabolic process	49 kDa	1	0	[]
Traes_2BL_10AC5A9F7.2	structural molecule activity	proteasome assembly Source: GO_Central protein catabolic process Source: TAIR response to cadmium ion	pep:novel chromosome:IWGSC1.0+popseq:2B:168828831:168831927:1 gene:Traes_2BL_10AC5A9F7 transcript:Traes_2BL_10AC5A9F7.2	47 kDa	1	0	[]
Traes_2BL_1BE176D07.1	NADH dehydrogenase activity	response to oxidative stress Source: TAIR ubiquinone-6 biosynthetic process	pep:novel scaffold:IWGSC1.0+popseq:IWGSC_CSS_2BL_scaff_8012538:978:6764:1 gene:Traes_2BL_1BE176D07 transcript:Traes_2BL_1BE176D07.1 description:"NAD(P)-binding Rossmann-fold superfamily protein"	33 kDa	1	0	[]
Traes_2BL_22224159C.1	aldehyde dehydrogenase (NAD) activity Source: TAIR betaine-aldehyde dehydrogenase activity	oxidation-reduction process Source: TAIR response to abscisic acid Source: TAIR response to water deprivation	pep:novel chromosome:IWGSC1.0+popseq:2B:106043888:106048848:-1 gene:Traes_2BL_22224159C transcript:Traes_2BL_22224159C.1	33 kDa	1	0	[]
Traes_2BL_3202C26C4.1	3-oxoacyl-[acyl-carrier-protein] synthase activity Source: InterPro beta-ketoacyl-acyl-carrier-protein synthase III activity	fatty acid biosynthetic process	pep:novel scaffold:IWGSC1.0+popseq:IWGSC_CSS_2BL_scaff_7964219:1843:5868:-1 gene:Traes_2BL_3202C26C4 transcript:Traes_2BL_3202C26C4.1 description:"3-ketoacyl-acyl carrier protein synthase III"	35 kDa	1	0	[]
Traes_2BL_3EB1B6A74.1	ligase activity	fatty acid metabolic process	pep:novel chromosome:IWGSC1.0+popseq:2B:335296099:335298397:-1 gene:Traes_2BL_3EB1B6A74 transcript:Traes_2BL_3EB1B6A74.1	52 kDa	1	0	[]
Traes_2BL_429364671.1 (+1)	heme binding Source: InterPro metal ion binding Source: UniProtKB-KW peroxidase activity	hydrogen peroxide catabolic process Source: UniProtKB-KW plant-type cell wall organization Source: GO_Central response to oxidative stress	pep:novel chromosome:IWGSC1.0+popseq:2B:343226520:343227545:1 gene:Traes_2BL_429364671 transcript:Traes_2BL_429364671.1	35 kDa	1	0	[]
Traes_2BL_44AF6C8FD.1	ATP binding	regulation of transcription, DNA-templated Source: UniProtKB-KW response to cadmium ion Source: TAIR response to cytokinin Source: TAIR response to endoplasmic reticulum stress Source: TAIR transcription, DNA-templated	pep:novel chromosome:IWGSC1.0+popseq:2B:340195954:340196610:-1 gene:Traes_2BL_44AF6C8FD transcript:Traes_2BL_44AF6C8FD.1	21 kDa	1	0	[]
Traes_2BL_4E383EF28.1	manganese ion binding Source: InterPro nutrient reservoir activity		pep:novel chromosome:IWGSC1.0+popseq:2B:298510222:298512587:1 gene:Traes_2BL_4E383EF28 transcript:Traes_2BL_4E383EF28.1	25 kDa	1	0	[]
Traes_2BL_5377B7F4C.1	transcription coactivator activity	histone H3 acetylation Source: GO_Central regulation of transcription by RNA polymerase II	pep:novel chromosome:IWGSC1.0+popseq:2B:309287774:309289941:1 gene:Traes_2BL_5377B7F4C transcript:Traes_2BL_5377B7F4C.1	47 kDa	1	0	[]
Traes_2BL_699DB5420.1	heme binding Source: InterPro metal ion binding Source: UniProtKB-KW peroxidase activity	hydrogen peroxide catabolic process Source: UniProtKB-KW response to oxidative stress Source: InterPro response to salt stress	pep:novel chromosome:IWGSC1.0+popseq:2B:95375446:95379042:1 gene:Traes_2BL_699DB5420 transcript:Traes_2BL_699DB5420.1	34 kDa	1	0	[]
Traes_2BL_8495512BD1.5	serine-type endopeptidase activity	mucilage extrusion from seed coat Source: TAIR mucilage metabolic process involved in seed coat development Source: TAIR seed coat development	pep:novel chromosome:IWGSC1.0+popseq:2B:90521759:90528007:-1 gene:Traes_2BL_8495512BD1 transcript:Traes_2BL_8495512BD1.5	81 kDa	1	0	[]
Traes_2BL_96956B81E.1	beta-glucosidase activity Source: GO_Central scopolin beta-glucosidase activity	carbohydrate metabolic process Source: InterPro glucosinolate catabolic process Source: GO_Central response to hormone Source: GO_Central response to salt stress	pep:novel chromosome:IWGSC1.0+popseq:2B:338610310:338611506:1 gene:Traes_2BL_96956B81E transcript:Traes_2BL_96956B81E.1	20 kDa	1	0	[]
Traes_2BL_9FBC81DEA.1	?	?	pep:novel chromosome:IWGSC1.0+popseq:2B:341183801:341185990:1 gene:Traes_2BL_9FBC81DEA transcript:Traes_2BL_9FBC81DEA.1	9 kDa	1	0	[]
Traes_2BL_A4FF3C90C.1		chloroplast organization Source: TAIR protein import into chloroplast stroma	pep:novel chromosome:IWGSC1.0+popseq:2B:169826065:169832851:-1 gene:Traes_2BL_A4FF3C90C transcript:Traes_2BL_A4FF3C90C.1 description:"hydroxyproline-rich glycoprotein family protein"	46 kDa	1	0	[]
Traes_2BL_A6336460A.1 (+1)	heme binding Source: InterPro iron ion binding Source: InterPro monooxygenase activity Source: GO_Central oxidoreductase activity, acting on paired donors, with incorporation or reduction of molecular oxygen Source: InterPro		pep:novel scaffold:IWGSC1.0+popseq:IWGSC_CSS_2BL_scaff_8033302:8607:11289:-1 gene:Traes_2BL_A6336460A transcript:Traes_2BL_A6336460A.1	60 kDa	1	0	[]
Traes_2BL_AFF8E770F.1	water channel activity	ion transmembrane transport	pep:novel chromosome:IWGSC1.0+popseq:2B:271274819:271277156:1 gene:Traes_2BL_AFF8E770F transcript:Traes_2BL_AFF8E770F.1	31 kDa	1	0	[]
Traes_2BL_B2072238F.1		lipid storage Source: TAIR response to freezing Source: TAIR seed germination Source: TAIR seed oilbody biogenesis Source: TAIR sexual reproduction	pep:novel chromosome:IWGSC1.0+popseq:2B:273648432:273649598:1 gene:Traes_2BL_B2072238F transcript:Traes_2BL_B2072238F.1	16 kDa	1	0	[]
Traes_2BL_BBE53E272.1	structural molecule activity	COPII-coated vesicle budding Source: InterPro mRNA transport Source: UniProtKB-KW positive regulation of TORC1 signaling Source: InterPro protein transport	pep:novel chromosome:IWGSC1.0+popseq:2B:309992110:309994532:1 gene:Traes_2BL_BBE53E272 transcript:Traes_2BL_BBE53E272.1	34 kDa	1	0	[]
Traes_2BL_D0EB33D21.1	cysteine-type endopeptidase activity Source: GO_Central cysteine-type peptidase activity Source: TAIR peptidase activity	defense response to fungus Source: TAIR proteolysis Source: TAIR proteolysis involved in cellular protein catabolic process	pep:novel chromosome:IWGSC1.0+popseq:2B:332173109:332176570:-1 gene:Traes_2BL_D0EB33D21 transcript:Traes_2BL_D0EB33D21.1	48 kDa	1	0	[]
Traes_2BL_E4D78CECE.2	ATP binding Source: UniProtKB-KW proline-tRNA ligase activity	embryo sac development Source: TAIR plant ovule development Source: TAIR prolyl-tRNA aminoacylation Source: GO_Central regulation of photosynthesis Source: TAIR seed development	pep:novel chromosome:IWGSC1.0+popseq:2B:171132897:171141333:1 gene:Traes_2BL_E4D78CECE transcript:Traes_2BL_E4D78CECE.2 description:"Class II aaRS and biotin synthetases superfamily protein"	61 kDa	1	0	[]
Traes_2BL_F3D782EF8.1	glutathione transferase activity	glutathione metabolic process Source: GO_Central toxin catabolic process	Ortholog: Encodes glutathione transferase belonging to the tau class of GSTs	26 kDa	1	0	[]
Traes_2BS_06EB5EB341.3		oxidation-reduction process	pep:novel chromosome:IWGSC1.0+popseq:2B:45871210:45874496:-1 gene:Traes_2BS_06EB5EB341 transcript:Traes_2BS_06EB5EB341.3 description:"LYR family of Fe/S cluster biogenesis protein"	15 kDa	1	0	[]
Traes_2BS_089C2E3C6.1	heme binding Source: InterPro iron ion binding Source: InterPro monooxygenase activity Source: TAIR oxidoreductase activity, acting on paired donors, with incorporation or reduction of molecular oxygen Source: InterPro	brassinosteroid biosynthetic process Source: TAIR brassinosteroid homeostasis Source: GO_Central multicellular organism development Source: GO_Central sterol metabolic process	pep:novel scaffold:IWGSC1.0+popseq:IWGSC_CSS_2BS_scaff_5183502:1376:4954:-1 gene:Traes_2BS_089C2E3C6 transcript:Traes_2BS_089C2E3C6.1	53 kDa	1	0	[]
Traes_2BS_0EFFAAE28.1	ADP binding Source: InterPro ATP binding Source: UniProtKB-KW nucleotide binding	plant-type hypersensitive response Source: TAIR signal transduction	pep:novel chromosome:IWGSC1.0+popseq:2B:131021893:131031862:-1 gene:Traes_2BS_0EFFAAE28 transcript:Traes_2BS_0EFFAAE28.1	134 kDa	1	0	[]
Traes_2BS_1B0F27580.2	DNA binding Source: UniProtKB-KW DNA binding transcription factor activity Source: TAIR protein self-association	transcription, DNA-templated	pep:novel chromosome:IWGSC1.0+popseq:2B:29581094:29585946:-1 gene:Traes_2BS_1B0F27580 transcript:Traes_2BS_1B0F27580.2	36 kDa	1	0	[]
Traes_2BS_24273473D.1	serine-type carboxypeptidase activity	proteolysis involved in cellular protein catabolic process	pep:novel chromosome:IWGSC1.0+popseq:2B:44147902:44152089:1 gene:Traes_2BS_24273473D transcript:Traes_2BS_24273473D.1 description:"serine carboxypeptidase-like 40"	58 kDa	1	0	[]
Traes_2BS_249C5DF99.2	pinoresinol reductase activity	lignan biosynthetic process	pep:novel chromosome:IWGSC1.0+popseq:2B:19467000:19467994:1 gene:Traes_2BS_249C5DF99 transcript:Traes_2BS_249C5DF99.2	19 kDa	1	0	[]
Traes_2BS_501C90841.1	5-formyltetrahydrofolate cyclo-ligase activity Source: TAIR ATP binding	folic acid-containing compound biosynthetic process Source: GO_Central tetrahydrofolate interconversion Source: GO_Central tetrahydrofolate metabolic process	pep:novel chromosome:IWGSC1.0+popseq:2B:201990871:201994970:1 gene:Traes_2BS_501C90841 transcript:Traes_2BS_501C90841.1 description:"5-formyltetrahydrofolate cycloligase"	31 kDa	1	0	[]
Traes_2BS_5497C0A63.2		rhythmic process	pep:novel chromosome:IWGSC1.0+popseq:2B:83445249:83451404:1 gene:Traes_2BS_5497C0A63 transcript:Traes_2BS_5497C0A63.2	172 kDa	1	0	[]
Traes_2BS_65836FEE4.1	copper ion binding Source: InterPro primary amine oxidase activity Source: InterPro quinone binding	amine metabolic process	Ortholog: Copper amine oxidase family protein; FUNCTIONS IN: quinone binding, primary amine oxidase activity, copper ion binding; INVOLVED IN: oxidation reduction, amine metabolic process	63 kDa	1	0	[]
Traes_2BS_67C199FD1.1	copper ion binding Source: InterPro oxidoreductase activity, oxidizing metal ions		pep:novel chromosome:IWGSC1.0+popseq:2B:205250007:205252200:1 gene:Traes_2BS_67C199FD1 transcript:Traes_2BS_67C199FD1.1	54 kDa	1	0	[]
Traes_2BS_6F640D7E9.1	DNA binding Source: TAIR histone binding Source: GO_Central protein heterodimerization activity	nucleosome assembly Source: GO_Central response to water deprivation	pep:novel scaffold:IWGSC1.0+popseq:IWGSC_CSS_2BS_scaff_5212886:3057:3558:-1 gene:Traes_2BS_6F640D7E9 transcript:Traes_2BS_6F640D7E9.1	11 kDa	1	0	[]
Traes_2BS_6FC2B14A6.1	aminoacyl-tRNA editing activity Source: InterPro ATP binding Source: UniProtKB-KW leucine-tRNA ligase activity Source: GO_Central valine-tRNA ligase activity	leucyl-tRNA aminoacylation Source: GO_Central valyl-tRNA aminoacylation	pep:novel chromosome:IWGSC1.0+popseq:2B:52292384:52295671:-1 gene:Traes_2BS_6FC2B14A6 transcript:Traes_2BS_6FC2B14A6.1	123 kDa	1	0	[]
Traes_2BS_7700613D4.1 (+1)	structural constituent of ribosome	response to cadmium ion Source: TAIR response to salt stress Source: TAIR translation	pep:novel chromosome:IWGSC1.0+popseq:2B:130634817:130635591:1 gene:Traes_2BS_7700613D4 transcript:Traes_2BS_7700613D4.1	13 kDa	1	0	[]
Traes_2BS_7F29300C6.2	translation elongation factor activity	defense response to bacterium	pep:novel chromosome:IWGSC1.0+popseq:2B:38639648:38641067:1 gene:Traes_2BS_7F29300C6 transcript:Traes_2BS_7F29300C6.2	24 kDa	1	0	[]
Traes_2BS_A9AF219E1.1	aspartic-type endopeptidase activity Source: GO_Central DNA binding	protein catabolic process Source: GO_Central proteolysis	pep:novel chromosome:IWGSC1.0+popseq:2B:43416887:43418963:1 gene:Traes_2BS_A9AF219E1 transcript:Traes_2BS_A9AF219E1.1	54 kDa	1	0	[]
Traes_2BS_B3411790F.1	DNA binding transcription factor activity Source: TAIR RNA polymerase II regulatory region sequence-specific DNA binding Source: GO_Central transcriptional activator activity, RNA polymerase II transcription regulatory region sequence-specific DNA binding	regulation of transcription, DNA-templated	pep:novel chromosome:IWGSC1.0+popseq:2B:236640230:236646799:1 gene:Traes_2BS_B3411790F transcript:Traes_2BS_B3411790F.1	60 kDa	1	0	[]
Traes_2BS_B8E7189CF.1 (+1)	chitinase activity Source: UniProtKB-EC chitin binding	cell wall macromolecule catabolic process Source: InterPro chitin catabolic process Source: UniProtKB-KW defense response to fungus Source: UniProtKB-KW killing of cells of other organism Source: UniProtKB-KW plant-type hypersensitive response Source: UniProtKB-KW polysaccharide catabolic process Source: UniProtKB-KW response to cadmium ion	pep:novel scaffold:IWGSC1.0+popseq:IWGSC_CSS_2BS_scaff_5236404:28555:29842:-1 gene:Traes_2BS_B8E7189CF transcript:Traes_2BS_B8E7189CF.1	33 kDa	1	0	[]
Traes_2BS_BA1828698.2 (+1)		protein transport	pep:novel chromosome:IWGSC1.0+popseq:2B:3236146:3240687:1 gene:Traes_2BS_BA1828698 transcript:Traes_2BS_BA1828698.2	67 kDa	1	0	[]
Traes_2BS_C52A9FD78.1	ATPase activity, coupled to transmembrane movement of substances Source: TAIR ATP binding Source: UniProtKB-KW xenobiotic transmembrane transporting ATPase activity	drug transmembrane transport Source: TAIR response to nematode Source: TAIR response to water deprivation Source: TAIR response to wounding Source: TAIR stomatal movement Source: TAIR transmembrane transport	pep:novel scaffold:IWGSC1.0+popseq:IWGSC_CSS_2BS_scaff_4748675:161:8184:-1 gene:Traes_2BS_C52A9FD78 transcript:Traes_2BS_C52A9FD78.1	133 kDa	1	0	[]
Traes_2BS_C6DD1091B.2	?	?	pep:novel chromosome:IWGSC1.0+popseq:2B:65728485:65730003:-1 gene:Traes_2BS_C6DD1091B transcript:Traes_2BS_C6DD1091B.2	8 kDa	1	0	[]
Traes_2BS_D2A3A5041.2	ARF guanyl-nucleotide exchange factor activity	defense response to bacterium Source: UniProtKB endocytosis Source: UniProtKB-KW growth Source: TAIR immune response Source: UniProtKB innate immune response Source: UniProtKB protein transport Source: UniProtKB-KW regulation of ARF protein signal transduction Source: InterPro vesicle-mediated transport Source: TAIR viral process	pep:novel chromosome:IWGSC1.0+popseq:2B:222168796:222188614:-1 gene:Traes_2BS_D2A3A5041 transcript:Traes_2BS_D2A3A5041.2	190 kDa	1	0	[]
Traes_2BS_D7601610D.2	?	?	pep:novel chromosome:IWGSC1.0+popseq:2B:59571858:59574819:1 gene:Traes_2BS_D7601610D transcript:Traes_2BS_D7601610D.2	41 kDa	1	0	[]
Traes_2BS_F8ED79291.3	heme binding Source: InterPro identical protein binding Source: TAIR iron ion binding Source: InterPro trans-cinnamate 4-monooxygenase activity	developmental process Source: TAIR growth Source: TAIR lignin metabolic process Source: TAIR phenylpropanoid metabolic process Source: TAIR pollen development Source: TAIR response to karrikin Source: TAIR ubiquinone biosynthetic process	pep:novel chromosome:IWGSC1.0+popseq:2B:41026793:41028768:-1 gene:Traes_2BS_F8ED79291 transcript:Traes_2BS_F8ED79291.3	59 kDa	1	0	[]
Traes_2BS_FB3F5E589.1	ATP binding Source: UniProtKB-KW hydrolase activity	cell cycle Source: UniProtKB-KW cell division Source: UniProtKB-KW protein transport	pep:novel scaffold:IWGSC1.0+popseq:IWGSC_CSS_2BS_scaff_5242583:1646:4324:-1 gene:Traes_2BS_FB3F5E589 transcript:Traes_2BS_FB3F5E589.1	87 kDa	1	0	[]
Traes_2BS_FF8887BE5.2	asparagine-tRNA ligase activity Source: TAIR ATP binding Source: UniProtKB-KW DNA binding	asparaginyl-tRNA aminoacylation Source: TAIR plant ovule development	pep:novel chromosome:IWGSC1.0+popseq:2B:196216852:196232492:1 gene:Traes_2BS_FF8887BE5 transcript:Traes_2BS_FF8887BE5.2 description:"Class II aminoacyl-tRNA and biotin synthetases superfamily protein"	60 kDa	1	0	[]
Traes_2DL_21E93225F.2	ATP binding Source: UniProtKB-KW protein serine/threonine kinase activity	protein phosphorylation	pep:novel scaffold:IWGSC1.0+popseq:IWGSC_CSS_2DL_scaff_9909382:2835:12343:-1 gene:Traes_2DL_21E93225F transcript:Traes_2DL_21E93225F.2	207 kDa	1	0	[]
Traes_2DL_3890B9567.1	?	?	pep:novel chromosome:IWGSC1.0+popseq:2D:112003290:112012633:-1 gene:Traes_2DL_3890B9567 transcript:Traes_2DL_3890B9567.1	251 kDa	1	0	[]
Traes_2DL_3C51B3AAE.3	acetate-CoA ligase activity Source: TAIR AMP binding Source: InterPro ATP binding	acetate metabolic process Source: TAIR acetyl-CoA biosynthetic process from acetate Source: InterPro fatty acid metabolic process	pep:novel chromosome:IWGSC1.0+popseq:2D:73420619:73425499:1 gene:Traes_2DL_3C51B3AAE transcript:Traes_2DL_3C51B3AAE.3	70 kDa	1	0	[]
Traes_2DL_475269B87.1	ATP binding Source: UniProtKB-KW calmodulin binding Source: UniProtKB carbohydrate binding Source: UniProtKB-KW protein kinase activity Source: TAIR protein serine/threonine kinase activity Source: UniProtKB ubiquitin protein ligase binding	protein autophosphorylation	pep:novel chromosome:IWGSC1.0+popseq:2D:23715370:23720193:-1 gene:Traes_2DL_475269B87 transcript:Traes_2DL_475269B87.1	93 kDa	1	0	[]
Traes_2DL_66736A596.1	beta-glucosidase activity Source: GO_Central scopolin beta-glucosidase activity	carbohydrate metabolic process Source: InterPro glycosyl compound metabolic process Source: GO_Central response to other organism	Ortholog: beta glucosidase 31 (BGLU31); FUNCTIONS IN: cation binding, hydrolase activity, hydrolyzing O-glycosyl compounds, catalytic activity; INVOLVED IN: response to other organism	49 kDa	1	0	[]
Traes_2DL_7399173C7.1	betaine-aldehyde dehydrogenase activity	glycine betaine biosynthetic process from choline Source: UniProtKB-UniPathway response to salt stress Source: TAIR response to water deprivation	pep:novel chromosome:IWGSC1.0+popseq:2D:84164077:84167382:-1 gene:Traes_2DL_7399173C7 transcript:Traes_2DL_7399173C7.1	49 kDa	1	0	[]
Traes_2DL_84143EBB3.2	ATP binding Source: InterPro hydrolase activity Source: UniProtKB-KW uridine kinase activity	pyrimidine nucleobase metabolic process Source: GO_Central pyrimidine nucleoside salvage	pep:novel chromosome:IWGSC1.0+popseq:2D:128420910:128421780:1 gene:Traes_2DL_84143EBB3 transcript:Traes_2DL_84143EBB3.2	18 kDa	1	0	[]
Traes_2DL_A208876FE.1	GTPase activity Source: GO_Central GTP binding Source: UniProtKB-KW translation elongation factor activity	response to cadmium ion	pep:novel scaffold:IWGSC1.0+popseq:IWGSC_CSS_2DL_scaff_9824056:2792:4531:-1 gene:Traes_2DL_A208876FE transcript:Traes_2DL_A208876FE.1	44 kDa	1	0	[]
Traes_2DL_AC6931E3F.1 (+1)	chitinase activity Source: TAIR chitin binding	cell wall macromolecule catabolic process Source: InterPro chitin catabolic process Source: UniProtKB-KW defense response Source: UniProtKB-KW polysaccharide catabolic process Source: UniProtKB-KW response to bacterium Source: UniProtKB response to wounding Source: UniProtKB somatic embryogenesis	pep:novel scaffold:IWGSC1.0+popseq:IWGSC_CSS_2DL_scaff_9909188:4044:4936:-1 gene:Traes_2DL_AC6931E3F transcript:Traes_2DL_AC6931E3F.1	29 kDa	1	0	[]
Traes_2DL_B2963E457.1		response to abscisic acid	pep:novel chromosome:IWGSC1.0+popseq:2D:137686199:137690721:-1 gene:Traes_2DL_B2963E457 transcript:Traes_2DL_B2963E457.1	92 kDa	1	0	[]
Traes_2DL_CA10E09CD.1		DNA repair Source: TAIR microsporogenesis Source: TAIR mitotic sister chromatid cohesion	pep:novel chromosome:IWGSC1.0+popseq:2D:69546099:69552089:-1 gene:Traes_2DL_CA10E09CD transcript:Traes_2DL_CA10E09CD.1	80 kDa	1	0	[]
Traes_2DL_D0018B779.1	protein binding, bridging		pep:novel chromosome:IWGSC1.0+popseq:2D:147636114:147640861:1 gene:Traes_2DL_D0018B779 transcript:Traes_2DL_D0018B779.1	39 kDa	1	0	[]
Traes_2DL_D385D5A91.1	manganese ion binding Source: InterPro nutrient reservoir activity		pep:novel chromosome:IWGSC1.0+popseq:2D:63391370:63393269:1 gene:Traes_2DL_D385D5A91 transcript:Traes_2DL_D385D5A91.1	27 kDa	1	0	[]
Traes_2DL_E3DF671E3.2	glutathione transferase activity	glutathione metabolic process Source: GO_Central toxin catabolic process	pep:novel chromosome:IWGSC1.0+popseq:2D:139848432:139849569:-1 gene:Traes_2DL_E3DF671E3 transcript:Traes_2DL_E3DF671E3.2	19 kDa	1	0	[]
Traes_2DL_E3E6A2E77.1		response to cytokinin	pep:novel chromosome:IWGSC1.0+popseq:2D:135343679:135345554:-1 gene:Traes_2DL_E3E6A2E77 transcript:Traes_2DL_E3E6A2E77.1	11 kDa	1	0	[]
Traes_2DL_E62014FEE.1	11-beta-hydroxysteroid dehydrogenase (NADP+) activity	steroid biosynthetic process	pep:novel chromosome:IWGSC1.0+popseq:2D:76086732:76088812:-1 gene:Traes_2DL_E62014FEE transcript:Traes_2DL_E62014FEE.1	48 kDa	1	0	[]
Traes_2DL_EA7EA558A1.2	ATP binding Source: UniProtKB-KW protein serine/threonine kinase activity	response to brassinosteroid Source: TAIR unidimensional cell growth	pep:novel scaffold:IWGSC1.0+popseq:IWGSC_CSS_2DL_scaff_9729656:1152:4657:-1 gene:Traes_2DL_EA7EA558A1 transcript:Traes_2DL_EA7EA558A1.2	52 kDa	1	0	[]
Traes_2DL_EE130E7CF.2	?	?	pep:novel chromosome:IWGSC1.0+popseq:2D:135716952:135723568:-1 gene:Traes_2DL_EE130E7CF transcript:Traes_2DL_EE130E7CF.2	93 kDa	1	0	[]
Traes_2DS_606EF19F6.2	copper ion binding	response to salt stress	pep:novel chromosome:IWGSC1.0+popseq:2D:52088143:52088792:-1 gene:Traes_2DS_606EF19F6 transcript:Traes_2DS_606EF19F6.2 description:"cytochrome C oxidase 6B"	18 kDa	1	0	[]
Traes_2DS_82E5468C9.1	GDP binding Source: TAIR GTPase activity Source: TAIR GTP binding		pep:novel chromosome:IWGSC1.0+popseq:2D:57166458:57172009:1 gene:Traes_2DS_82E5468C9 transcript:Traes_2DS_82E5468C9.1 description:"GTP-binding protein-related"	41 kDa	1	0	[]
Traes_2DS_A92C008F1.1	mRNA binding Source: TAIR ribosome binding Source: GO_Central translation initiation factor activity	translational initiation	pep:novel chromosome:IWGSC1.0+popseq:2D:12506188:12510157:-1 gene:Traes_2DS_A92C008F1 transcript:Traes_2DS_A92C008F1.1	30 kDa	1	0	[]
Traes_3AL_2B49570F4.1	oxidoreductase activity		pep:novel scaffold:IWGSC1.0+popseq:IWGSC_CSS_3AL_scaff_4234005:1571:5217:-1 gene:Traes_3AL_2B49570F4 transcript:Traes_3AL_2B49570F4.1	33 kDa	1	0	[]
Traes_3AL_56C9C6192.1	ATP binding Source: UniProtKB-KW DNA binding Source: UniProtKB-KW helicase activity		pep:novel scaffold:IWGSC1.0+popseq:IWGSC_CSS_3AL_scaff_4297226:2:3247:1 gene:Traes_3AL_56C9C6192 transcript:Traes_3AL_56C9C6192.1	107 kDa	1	0	[]
Traes_3AL_7790A4503.1	?	?	pep:novel scaffold:IWGSC1.0+popseq:IWGSC_CSS_3AL_scaff_2330087:57:2794:-1 gene:Traes_3AL_7790A4503 transcript:Traes_3AL_7790A4503.1 description:"FUNCTIONS IN\x3a molecular_function unknown\x3b INVOLVED IN\x3a biological_process unknown\x3b LOCATED IN\x3a chloroplast thylakoid membrane, chloroplast\x3b EXPRESSED IN\x3a 23 plant structures\x3b EXPRESSED DURING\x3a 13 growth stages\x3b BEST Arabidop…	12 kDa	1	0	[]
Traes_3AL_7AAE4C340.1 (+1)		cell redox homeostasis Source: InterPro queuosine biosynthetic process	pep:novel chromosome:IWGSC1.0+popseq:3A:160174715:160175553:-1 gene:Traes_3AL_7AAE4C340 transcript:Traes_3AL_7AAE4C340.1	12 kDa	1	0	[]
Traes_3AL_8A24FA0FF.1	carboxypeptidase activity Source: UniProtKB-KW transferase activity, transferring acyl groups other than amino-acyl groups	secondary metabolic process	pep:novel chromosome:IWGSC1.0+popseq:3A:170029747:170033151:-1 gene:Traes_3AL_8A24FA0FF transcript:Traes_3AL_8A24FA0FF.1	41 kDa	1	0	[]
Traes_3AL_D6ED281BC.1	ATPase activity, coupled to transmembrane movement of substances Source: GO_Central ATP binding	drug transmembrane transport Source: TAIR organic hydroxy compound transport Source: TAIR p-coumaryl alcohol transport Source: TAIR regulation of lignin biosynthetic process	pep:novel chromosome:IWGSC1.0+popseq:3A:138831287:138837778:1 gene:Traes_3AL_D6ED281BC transcript:Traes_3AL_D6ED281BC.1	130 kDa	1	0	[]
Traes_3AL_E7DD1DD1D.1	4 iron, 4 sulfur cluster binding Source: UniProtKB-KW metal ion binding Source: UniProtKB-KW NADH dehydrogenase (ubiquinone) activity Source: InterPro NADPH dehydrogenase activity Source: TAIR quinone binding	photosynthesis	pep:novel scaffold:IWGSC1.0+popseq:IWGSC_CSS_3AL_scaff_4354924:1:506:-1 gene:Traes_3AL_E7DD1DD1D transcript:Traes_3AL_E7DD1DD1D.1	20 kDa	1	0	[]
Traes_3AL_F623F588A.2	calmodulin binding Source: UniProtKB-KW glutamate decarboxylase activity Source: UniProtKB-EC pyridoxal phosphate binding	glutamate metabolic process	pep:novel scaffold:IWGSC1.0+popseq:IWGSC_CSS_3AL_scaff_4407012:1230:4407:-1 gene:Traes_3AL_F623F588A transcript:Traes_3AL_F623F588A.2	56 kDa	1	0	[]
Traes_3AS_0DAD75B56.2	heme binding Source: InterPro iron ion binding Source: InterPro monooxygenase activity Source: UniProtKB-KW oxidoreductase activity, acting on paired donors, with incorporation or reduction of molecular oxygen		pep:novel chromosome:IWGSC1.0+popseq:3A:18240811:18243290:1 gene:Traes_3AS_0DAD75B56 transcript:Traes_3AS_0DAD75B56.2	58 kDa	1	0	[]
Traes_3AS_2BA6CAF50.2	NAD binding Source: InterPro phosphoglycerate dehydrogenase activity	L-serine biosynthetic process	pep:novel scaffold:IWGSC1.0+popseq:IWGSC_CSS_3AS_scaff_3399720:136:1540:1 gene:Traes_3AS_2BA6CAF50 transcript:Traes_3AS_2BA6CAF50.2	26 kDa	1	0	[]
Traes_3AS_3625E0379.1	NADH dehydrogenase (ubiquinone) activity		pep:novel scaffold:IWGSC1.0+popseq:IWGSC_CSS_3AS_scaff_1794912:73:621:-1 gene:Traes_3AS_3625E0379 transcript:Traes_3AS_3625E0379.1	20 kDa	1	0	[]
Traes_3AS_D70717386.1	aspartate-tRNA ligase activity Source: UniProtKB-EC ATP binding Source: UniProtKB-KW DNA binding Source: UniProtKB-KW metal ion binding	tRNA aminoacylation for protein translation	pep:novel chromosome:IWGSC1.0+popseq:3A:12513837:12521611:-1 gene:Traes_3AS_D70717386 transcript:Traes_3AS_D70717386.1 description:"tRNA synthetase class II (D, K and N) family protein"	63 kDa	1	0	[]
Traes_3AS_F441DDE21.1	heme binding Source: InterPro metal ion binding Source: UniProtKB-KW peroxidase activity	hydrogen peroxide catabolic process Source: UniProtKB-KW lignin biosynthetic process Source: TAIR response to oxidative stress	pep:novel scaffold:IWGSC1.0+popseq:IWGSC_CSS_3AS_scaff_3418817:1730:3747:-1 gene:Traes_3AS_F441DDE21 transcript:Traes_3AS_F441DDE21.1	36 kDa	1	0	[]
Traes_3B_0A27A32B2.1		cotranslational protein targeting to membrane	pep:novel scaffold:IWGSC1.0+popseq:IWGSC_CSS_3B_scaff_10594806:2488:4397:1 gene:Traes_3B_0A27A32B2 transcript:Traes_3B_0A27A32B2.1	21 kDa	1	0	[]
Traes_3B_0DCFCDDEB.1	4 iron, 4 sulfur cluster binding Source: UniProtKB-KW electron transfer activity Source: InterPro metal ion binding	photosynthesis Source: TAIR photosynthetic electron transport in photosystem I	pep:novel scaffold:IWGSC1.0+popseq:IWGSC_CSS_3B_scaff_10518233:300:782:1 gene:Traes_3B_0DCFCDDEB transcript:Traes_3B_0DCFCDDEB.1	9 kDa	1	0	[]
Traes_3B_2A454DB62.1	phosphatidylethanolamine binding	cell differentiation Source: UniProtKB-KW flower development Source: UniProtKB-KW photoperiodism, flowering Source: TAIR positive regulation of flower development Source: TAIR regulation of flower development Source: TAIR regulation of stomatal movement	pep:novel scaffold:IWGSC1.0+popseq:IWGSC_CSS_3B_scaff_10756944:10643:12180:-1 gene:Traes_3B_2A454DB62 transcript:Traes_3B_2A454DB62.1	12 kDa	1	0	[]
Traes_3B_348D235D0.1		plant-type cell wall loosening Source: TAIR sexual reproduction Source: InterPro unidimensional cell growth	pep:novel scaffold:IWGSC1.0+popseq:IWGSC_CSS_3B_scaff_10500198:1435:2451:1 gene:Traes_3B_348D235D0 transcript:Traes_3B_348D235D0.1	28 kDa	1	0	[]
Traes_3B_72A1208ED.1	metal ion binding Source: UniProtKB-KW oxidoreductase activity, acting on diphenols and related substances as donors, oxygen as acceptor	leaf senescence	pep:novel scaffold:IWGSC1.0+popseq:IWGSC_CSS_3B_scaff_10505233:5634:8802:-1 gene:Traes_3B_72A1208ED transcript:Traes_3B_72A1208ED.1	39 kDa	1	0	[]
Traes_3B_8732922B8.1	heme binding Source: InterPro metal ion binding Source: UniProtKB-KW peroxidase activity	hydrogen peroxide catabolic process Source: UniProtKB-KW plant-type cell wall organization Source: GO_Central response to oxidative stress	pep:novel scaffold:IWGSC1.0+popseq:IWGSC_CSS_3B_scaff_10771027:7056:8629:1 gene:Traes_3B_8732922B8 transcript:Traes_3B_8732922B8.1	38 kDa	1	0	[]
Traes_3B_C8DBBCD0E.1		abscisic acid-activated signaling pathway Source: UniProtKB-KW positive regulation of seed germination Source: TAIR response to abscisic acid	pep:novel scaffold:IWGSC1.0+popseq:IWGSC_CSS_3B_scaff_10433209:4512:5756:1 gene:Traes_3B_C8DBBCD0E transcript:Traes_3B_C8DBBCD0E.1	11 kDa	1	0	[]
Traes_3DL_46648C68A.1	ADP binding Source: InterPro ATP binding	plant-type hypersensitive response Source: GO_Central signal transduction	pep:novel chromosome:IWGSC1.0+popseq:3D:121495261:121502839:-1 gene:Traes_3DL_46648C68A transcript:Traes_3DL_46648C68A.1	129 kDa	1	0	[]
Traes_3DL_4FF80F0AC.2	?	?	pep:novel chromosome:IWGSC1.0+popseq:3D:30720093:30722055:-1 gene:Traes_3DL_4FF80F0AC transcript:Traes_3DL_4FF80F0AC.2	18 kDa	1	0	[]
Traes_3DL_697C5EDDA.1	calmodulin binding Source: TAIR thiol-dependent ubiquitinyl hydrolase activity	protein deubiquitination Source: TAIR ubiquitin-dependent protein catabolic process	pep:novel chromosome:IWGSC1.0+popseq:3D:39793026:39794291:1 gene:Traes_3DL_697C5EDDA transcript:Traes_3DL_697C5EDDA.1	12 kDa	1	0	[]
Traes_3DL_722517D47.1	SNAP receptor activity Source: GO_Central SNARE binding	exocytosis Source: GO_Central protein transport Source: UniProtKB-KW vesicle fusion	pep:novel chromosome:IWGSC1.0+popseq:3D:121968954:121971694:-1 gene:Traes_3DL_722517D47 transcript:Traes_3DL_722517D47.1	11 kDa	1	0	[]
Traes_3DL_7E980C685.1	copper ion binding Source: TAIR GTPase activity Source: InterPro GTP binding Source: UniProtKB-KW mRNA binding Source: TAIR translation elongation factor activity	cold acclimation Source: UniProtKB response to cold Source: UniProtKB response to cytokinin	pep:novel chromosome:IWGSC1.0+popseq:3D:42888150:42893101:-1 gene:Traes_3DL_7E980C685 transcript:Traes_3DL_7E980C685.1	94 kDa	1	0	[]
Traes_3DL_DB2EC12F7.1	ATP binding Source: UniProtKB-KW ATP-dependent RNA helicase activity Source: GO_Central RNA binding	defense response to fungus, incompatible interaction Source: TAIR embryo development ending in seed dormancy Source: TAIR gene expression Source: UniProtKB mRNA splicing, via spliceosome Source: UniProtKB positive regulation of RNA splicing Source: UniProtKB primary miRNA processing Source: TAIR regulation of transcription, DNA-templated Source: UniProtKB-KW RNA interference Source: UniProtKB RNA…	pep:novel chromosome:IWGSC1.0+popseq:3D:79718328:79721587:-1 gene:Traes_3DL_DB2EC12F7 transcript:Traes_3DL_DB2EC12F7.1	104 kDa	1	0	[]
Traes_3DS_2D152D7C4.1	peptidyl-prolyl cis-trans isomerase activity	protein folding	pep:novel chromosome:IWGSC1.0+popseq:3D:52937500:52941472:1 gene:Traes_3DS_2D152D7C4 transcript:Traes_3DS_2D152D7C4.1	12 kDa	1	0	[]
Traes_3DS_4885C4A65.1	thiol-dependent ubiquitin-specific protease activity Source: TAIR zinc ion binding	embryo development ending in seed dormancy Source: TAIR protein deubiquitination Source: TAIR root hair elongation Source: TAIR ubiquitin-dependent protein catabolic process	pep:novel chromosome:IWGSC1.0+popseq:3D:15703136:15711853:1 gene:Traes_3DS_4885C4A65 transcript:Traes_3DS_4885C4A65.1 description:"ubiquitin-specific protease 14"	70 kDa	1	0	[]
Traes_4AL_03723C140.1 (+1)	structural molecule activity	intracellular protein transport Source: UniProtKB-UniRule vesicle-mediated transport	pep:novel chromosome:IWGSC1.0+popseq:4A:188561820:188570528:-1 gene:Traes_4AL_03723C140 transcript:Traes_4AL_03723C140.1	97 kDa	1	0	[]
Traes_4AL_0391CAB22.1 (+2)	cellulase activity	cellulose biosynthetic process Source: TAIR cellulose catabolic process Source: UniProtKB-KW cell wall organization Source: UniProtKB-KW cortical microtubule organization Source: TAIR hyperosmotic salinity response Source: TAIR response to cytokinin Source: TAIR shoot system development Source: TAIR unidimensional cell growth	pep:novel scaffold:IWGSC1.0+popseq:IWGSC_CSS_4AL_scaff_7166434:1200:4945:-1 gene:Traes_4AL_0391CAB22 transcript:Traes_4AL_0391CAB22.1	69 kDa	1	0	[]
Traes_4AL_218912B49.1	hydrolase activity, acting on ester bonds	lipid catabolic process	pep:novel chromosome:IWGSC1.0+popseq:4A:185453712:185455323:1 gene:Traes_4AL_218912B49 transcript:Traes_4AL_218912B49.1	36 kDa	1	0	[]
Traes_4AL_234D9FEC7.2 (+1)	?	?	pep:novel chromosome:IWGSC1.0+popseq:4A:190772541:190778037:-1 gene:Traes_4AL_234D9FEC7 transcript:Traes_4AL_234D9FEC7.2	49 kDa	1	0	[]
Traes_4AL_27C235951.1	7S RNA binding Source: InterPro GTPase activity Source: InterPro GTP binding Source: UniProtKB-KW protein domain specific binding	protein heterotrimerization Source: CAFA SRP-dependent cotranslational protein targeting to membrane	pep:novel chromosome:IWGSC1.0+popseq:4A:122992343:122998333:1 gene:Traes_4AL_27C235951 transcript:Traes_4AL_27C235951.1	61 kDa	1	0	[]
Traes_4AL_2A2E81E05.5 (+2)	4 iron, 4 sulfur cluster binding Source: UniProtKB-KW ADP-ribose pyrophosphohydrolase activity Source: TAIR carbon-carbon lyase activity Source: InterPro iron-sulfur cluster binding Source: TAIR metal ion binding Source: UniProtKB-KW protein domain specific binding	response to vitamin B1 Source: TAIR thiamine biosynthetic process Source: TAIR thiamine diphosphate biosynthetic process	pep:novel chromosome:IWGSC1.0+popseq:4A:157091547:157098902:-1 gene:Traes_4AL_2A2E81E05 transcript:Traes_4AL_2A2E81E05.5 description:"thiaminC"	72 kDa	1	0	[]
Traes_4AL_2CBF8EFBF.1	aspartic-type endopeptidase activity	protein catabolic process Source: GO_Central proteolysis	pep:novel chromosome:IWGSC1.0+popseq:4A:204851066:204852964:1 gene:Traes_4AL_2CBF8EFBF transcript:Traes_4AL_2CBF8EFBF.1	39 kDa	1	0	[]
Traes_4AL_3464D151A.2	metal ion binding		pep:novel scaffold:IWGSC1.0+popseq:IWGSC_CSS_4AL_scaff_7127854:4119:12960:-1 gene:Traes_4AL_3464D151A transcript:Traes_4AL_3464D151A.2	218 kDa	1	0	[]
Traes_4AL_450759DB9.1	beta-fructofuranosidase activity Source: TAIR sucrose alpha-glucosidase activity	abscisic acid-activated signaling pathway Source: UniProtKB-KW cellular response to gibberellin stimulus Source: UniProtKB primary root development Source: UniProtKB response to bacterium Source: UniProtKB sucrose metabolic process	Ortholog; Encodes a vacuolar invertase betaFruct4. betaFruct4 is transported from the endoplasmic reticulum through the intermediate compartments as a membrane protein	68 kDa	1	0	[]
Traes_4AL_541C86EB9.1	snRNA stem-loop binding	mRNA splicing, via spliceosome	pep:novel chromosome:IWGSC1.0+popseq:4A:200998135:200999074:1 gene:Traes_4AL_541C86EB9 transcript:Traes_4AL_541C86EB9.1	21 kDa	1	0	[]
Traes_4AL_5AC007983.1 (+2)	zinc ion binding	ER to Golgi vesicle-mediated transport Source: InterPro intracellular protein transport Source: InterPro response to oxidative stress	pep:novel chromosome:IWGSC1.0+popseq:4A:15190101:15193436:-1 gene:Traes_4AL_5AC007983 transcript:Traes_4AL_5AC007983.1	102 kDa	1	0	[]
Traes_4AL_710B39988.1 (+1)	mRNA binding		pep:novel scaffold:IWGSC1.0+popseq:IWGSC_CSS_4AL_scaff_6293353:2106:3633:-1 gene:Traes_4AL_710B39988 transcript:Traes_4AL_710B39988.1	49 kDa	1	0	[]
Traes_4AL_8224C29A9.2	DNA binding	chromatin remodeling Source: TAIR covalent chromatin modification Source: UniProtKB-KW multicellular organism development Source: UniProtKB-KW regulation of transcription, DNA-templated Source: UniProtKB-KW transcription, DNA-templated	pep:novel chromosome:IWGSC1.0+popseq:4A:83944513:83953224:1 gene:Traes_4AL_8224C29A9 transcript:Traes_4AL_8224C29A9.2	31 kDa	1	0	[]
Traes_4AL_97B41C18E.1	ADP binding Source: InterPro ATP binding	plant-type hypersensitive response Source: GO_Central signal transduction	pep:novel scaffold:IWGSC1.0+popseq:IWGSC_CSS_4AL_scaff_7171329:462:1669:-1 gene:Traes_4AL_97B41C18E transcript:Traes_4AL_97B41C18E.1	14 kDa	1	0	[]
Traes_4AL_9BCB37710.2 (+2)	?	?	pep:novel chromosome:IWGSC1.0+popseq:4A:163771696:163775949:1 gene:Traes_4AL_9BCB37710 transcript:Traes_4AL_9BCB37710.2	56 kDa	1	0	[]
Traes_4AL_9EF17CC5C.1 (+1)	S-methyl-5-thioribose-1-phosphate isomerase activity	cellular response to ethylene stimulus Source: TAIR cellular response to iron ion Source: TAIR cellular response to nitric oxide Source: TAIR L-methionine salvage from methylthioadenosine	pep:novel scaffold:IWGSC1.0+popseq:IWGSC_CSS_4AL_scaff_7106289:67:3093:-1 gene:Traes_4AL_9EF17CC5C transcript:Traes_4AL_9EF17CC5C.1 description:"NagB/RpiA/CoA transferase-like superfamily protein"	33 kDa	1	0	[]
Traes_4AL_A92657C6E.2	magnesium ion binding Source: InterPro phosphoglucomutase activity	carbohydrate metabolic process Source: TAIR detection of gravity Source: GO_Central galactose catabolic process Source: GO_Central glucose metabolic process Source: GO_Central glycogen biosynthetic process Source: GO_Central response to cadmium ion Source: TAIR starch biosynthetic process	pep:novel chromosome:IWGSC1.0+popseq:4A:140536516:140542551:1 gene:Traes_4AL_A92657C6E transcript:Traes_4AL_A92657C6E.2	54 kDa	1	0	[]
Traes_4AL_AC322634F.1	identical protein binding Source: IntAct mRNA binding	mRNA splicing, via spliceosome Source: TAIR response to oxidative stress Source: TAIR RNA splicing	pep:novel chromosome:IWGSC1.0+popseq:4A:155026117:155030498:1 gene:Traes_4AL_AC322634F transcript:Traes_4AL_AC322634F.1	31 kDa	1	0	[]
Traes_4AL_B6154ED13.1	glucose transmembrane transporter activity Source: GO_Central sugar:proton symporter activity	glucose import Source: GO_Central hexose transmembrane transport	pep:novel chromosome:IWGSC1.0+popseq:4A:182761884:182764076:-1 gene:Traes_4AL_B6154ED13 transcript:Traes_4AL_B6154ED13.1	54 kDa	1	0	[]
Traes_4AL_BD2E1734E.2	metal ion binding Source: UniProtKB-KW peptidase inhibitor activity	defense response to bacterium	pep:novel chromosome:IWGSC1.0+popseq:4A:178458937:178460483:1 gene:Traes_4AL_BD2E1734E transcript:Traes_4AL_BD2E1734E.2	40 kDa	1	0	[]
Traes_4AL_D5BB5472A.1	ATPase activity Source: GO_Central ATP binding Source: UniProtKB-KW microtubule binding Source: InterPro microtubule motor activity	microtubule-based movement Source: GO_Central regulation of microtubule-based process Source: InterPro root development	pep:novel chromosome:IWGSC1.0+popseq:4A:187046056:187053426:1 gene:Traes_4AL_D5BB5472A transcript:Traes_4AL_D5BB5472A.1	83 kDa	1	0	[]
Traes_4AL_DA5D4FAE4.1	alcohol dehydrogenase (NAD) activity Source: UniProtKB-EC zinc ion binding		pep:novel scaffold:IWGSC1.0+popseq:IWGSC_CSS_4AL_scaff_7148081:5253:6589:-1 gene:Traes_4AL_DA5D4FAE4 transcript:Traes_4AL_DA5D4FAE4.1	18 kDa	1	0	[]
Traes_4AL_DE6DA7E39.1	sucrose-phosphate synthase activity Source: TAIR sucrose synthase activity	sucrose biosynthetic process	pep:novel chromosome:IWGSC1.0+popseq:4A:154747425:154751998:-1 gene:Traes_4AL_DE6DA7E39 transcript:Traes_4AL_DE6DA7E39.1	67 kDa	1	0	[]
Traes_4AL_DF2454E0F.1		cell cycle arrest Source: GO_Central cell division Source: UniProtKB-UniRule polar nucleus fusion Source: TAIR regulation of translation	pep:novel chromosome:IWGSC1.0+popseq:4A:205537909:205539587:1 gene:Traes_4AL_DF2454E0F transcript:Traes_4AL_DF2454E0F.1	46 kDa	1	0	[]
Traes_4AL_E7A048720.3 (+2)		multicellular organism development	pep:novel scaffold:IWGSC1.0+popseq:IWGSC_CSS_4AL_scaff_7066394:1036:1690:-1 gene:Traes_4AL_E7A048720 transcript:Traes_4AL_E7A048720.3	13 kDa	1	0	[]
Traes_4AL_ED8E895D21.1 (+1)	?	?	pep:novel chromosome:IWGSC1.0+popseq:4A:196639032:196640069:-1 gene:Traes_4AL_ED8E895D21 transcript:Traes_4AL_ED8E895D21.1	20 kDa	1	0	[]
Traes_4AL_F2A4B03DC.1	?	?	pep:novel scaffold:IWGSC1.0+popseq:IWGSC_CSS_4AL_scaff_7063429:4549:6064:1 gene:Traes_4AL_F2A4B03DC transcript:Traes_4AL_F2A4B03DC.1	17 kDa	1	0	[]
Traes_4AL_F5E83F7BA.1 (+1)	oxidative phosphorylation uncoupler activity	mitochondrial transmembrane transport Source: GO_Central mitochondrial transport Source: GO_Central photorespiration	pep:novel scaffold:IWGSC1.0+popseq:IWGSC_CSS_4AL_scaff_7134133:4023:8255:1 gene:Traes_4AL_F5E83F7BA transcript:Traes_4AL_F5E83F7BA.1	32 kDa	1	0	[]
Traes_4AL_FE0C5AEF4.1	sucrose alpha-glucosidase activity	abscisic acid-activated signaling pathway Source: UniProtKB-KW cellular response to gibberellin stimulus Source: UniProtKB response to bacterium Source: UniProtKB sucrose metabolic process	pep:novel chromosome:IWGSC1.0+popseq:4A:210996411:211000154:-1 gene:Traes_4AL_FE0C5AEF4 transcript:Traes_4AL_FE0C5AEF4.1	68 kDa	1	0	[]
Traes_4AS_11588E7ED.1 (+2)	peptide receptor activity Source: TAIR polyubiquitin modification-dependent protein binding	cellular response to DNA damage stimulus Source: TAIR leaf development Source: TAIR leaf senescence Source: TAIR pollen development Source: TAIR post-embryonic root development Source: TAIR proteasome assembly Source: TAIR proteasome-mediated ubiquitin-dependent protein catabolic process Source: TAIR protein catabolic process Source: TAIR regulation of seed germination Source: TAIR response to ab…	pep:novel chromosome:IWGSC1.0+popseq:4A:43918114:43921809:-1 gene:Traes_4AS_11588E7ED transcript:Traes_4AS_11588E7ED.1 description:"regulatory particle non-ATPase 10"	42 kDa	1	0	[]
Traes_4AS_349ED4749.1	1,2-alpha-L-fucosidase activity	metabolic process	pep:novel chromosome:IWGSC1.0+popseq:4A:22284081:22291959:1 gene:Traes_4AS_349ED4749 transcript:Traes_4AS_349ED4749.1	94 kDa	1	0	[]
Traes_4AS_36E4EA43D.1 (+2)	UFM1 transferase activity	protein K69-linked ufmylation	pep:novel scaffold:IWGSC1.0+popseq:IWGSC_CSS_4AS_scaff_5994006:9381:10528:-1 gene:Traes_4AS_36E4EA43D transcript:Traes_4AS_36E4EA43D.1 description:"CONTAINS InterPro DOMAIN/s\x3a Ubiquitin-conjugating enzyme/RWD-like (InterPro\x3aIPR016135), Ubiquitin-fold modifier-conjugating enzyme 1 (InterPro\x3aIPR014806)\x3b Has 269 Blast hits to 269 proteins in 110 species\x3a Archae - 0\x3b Bacteria - 0\x3…	20 kDa	1	0	[]
Traes_4AS_5AA9E57F1.1	serine-type peptidase activity		pep:novel chromosome:IWGSC1.0+popseq:4A:94744813:94751732:1 gene:Traes_4AS_5AA9E57F1 transcript:Traes_4AS_5AA9E57F1.1	103 kDa	1	0	[]
Traes_4AS_7C9340F03.1	ATP binding Source: UniProtKB-KW methionine-tRNA ligase activity Source: UniProtKB-EC tRNA binding	methionyl-tRNA aminoacylation Source: InterPro response to cadmium ion Source: TAIR tRNA aminoacylation for protein translation	pep:novel chromosome:IWGSC1.0+popseq:4A:24132855:24138998:1 gene:Traes_4AS_7C9340F03 transcript:Traes_4AS_7C9340F03.1	89 kDa	1	0	[]
Traes_4AS_8CDF87CBD.2		mRNA processing Source: InterPro RNA splicing	pep:novel chromosome:IWGSC1.0+popseq:4A:61597778:61607530:1 gene:Traes_4AS_8CDF87CBD transcript:Traes_4AS_8CDF87CBD.2	94 kDa	1	0	[]
Traes_4AS_97D5BBDE7.2	hydrolase activity Source: UniProtKB-KW metal ion binding	cell redox homeostasis Source: InterPro metabolic process Source: InterPro nonphotochemical quenching	pep:novel chromosome:IWGSC1.0+popseq:4A:80577192:80589267:-1 gene:Traes_4AS_97D5BBDE7 transcript:Traes_4AS_97D5BBDE7.2	65 kDa	1	0	[]
Traes_4AS_9F46EA4DC.1	P-P-bond-hydrolysis-driven protein transmembrane transporter activity	chloroplast organization Source: TAIR embryonic morphogenesis Source: TAIR protein import into chloroplast stroma Source: TAIR protein targeting to chloroplast Source: TAIR response to cytokinin	pep:novel chromosome:IWGSC1.0+popseq:4A:64640753:64645886:-1 gene:Traes_4AS_9F46EA4DC transcript:Traes_4AS_9F46EA4DC.1	87 kDa	1	0	[]
Traes_4AS_B9F2F6646.1 (+1)	hydroxyacylglutathione hydrolase activity Source: UniProtKB-EC metal ion binding	methylglyoxal catabolic process to D-lactate via S-lactoyl-glutathione	Metallo-hydrolase/oxidoreductase superfamily protein	29 kDa	1	0	[]
Traes_4AS_EFC609145.1 (+1)	[acyl-carrier-protein] S-malonyltransferase activity	fatty acid biosynthetic process	pep:novel chromosome:IWGSC1.0+popseq:4A:54358340:54362374:1 gene:Traes_4AS_EFC609145 transcript:Traes_4AS_EFC609145.1 description:"catalytics\x3btransferases\x3b"	40 kDa	1	0	[]
Traes_4AS_FF38617E5.1	lipid binding	lipid transport	pep:novel chromosome:IWGSC1.0+popseq:4A:42028497:42034823:-1 gene:Traes_4AS_FF38617E5 transcript:Traes_4AS_FF38617E5.1	52 kDa	1	0	[]
Traes_4BL_3B8727D00.2	calcium ion binding		pep:novel chromosome:IWGSC1.0+popseq:4B:263611816:263615969:1 gene:Traes_4BL_3B8727D00 transcript:Traes_4BL_3B8727D00.2	42 kDa	1	0	[]
Traes_4BL_4DB9F4DFF.1 (+1)	protein histidine kinase binding		pep:novel chromosome:IWGSC1.0+popseq:4B:300368317:300373331:-1 gene:Traes_4BL_4DB9F4DFF transcript:Traes_4BL_4DB9F4DFF.1	31 kDa	1	0	[]
Traes_4BL_606BED645.1		rRNA processing	pep:novel scaffold:IWGSC1.0+popseq:IWGSC_CSS_4BL_scaff_6959791:1254:7081:-1 gene:Traes_4BL_606BED645 transcript:Traes_4BL_606BED645.1	83 kDa	1	0	[]
Traes_4BL_7EBF7B708.1		intralumenal vesicle formation Source: TAIR protein transport Source: UniProtKB-KW vacuolar transport	pep:novel chromosome:IWGSC1.0+popseq:4B:315394226:315396495:-1 gene:Traes_4BL_7EBF7B708 transcript:Traes_4BL_7EBF7B708.1	26 kDa	1	0	[]
Traes_4BL_87A244E73.2		plant-type cell wall loosening Source: TAIR sexual reproduction Source: InterPro unidimensional cell growth	pep:novel chromosome:IWGSC1.0+popseq:4B:313799531:313800947:1 gene:Traes_4BL_87A244E73 transcript:Traes_4BL_87A244E73.2	12 kDa	1	0	[]
Traes_4BL_98B3C3F2F.2	chitin binding	defense response	pep:novel chromosome:IWGSC1.0+popseq:4B:301365482:301370993:-1 gene:Traes_4BL_98B3C3F2F transcript:Traes_4BL_98B3C3F2F.2	45 kDa	1	0	[]
Traes_4BL_F2C2A7E02.1	ATP binding	chloroplast organization Source: TAIR protein metabolic process Source: InterPro protein refolding Source: InterPro response to heat	pep:novel scaffold:IWGSC1.0+popseq:IWGSC_CSS_4BL_scaff_6992320:2028:7395:-1 gene:Traes_4BL_F2C2A7E02 transcript:Traes_4BL_F2C2A7E02.1 description:"casein lytic proteinase B3"	100 kDa	1	0	[]
Traes_4BL_F7C734D2D.2	DNA binding Source: UniProtKB-KW protein heterodimerization activity		pep:novel scaffold:IWGSC1.0+popseq:IWGSC_CSS_4BL_scaff_6978985:2341:6528:1 gene:Traes_4BL_F7C734D2D transcript:Traes_4BL_F7C734D2D.2	16 kDa	1	0	[]
Traes_4BS_3C044B05F.1	cellulose synthase (UDP-forming) activity Source: TAIR intramolecular transferase activity Source: UniProtKB structural constituent of ribosome Source: CAFA UDP-arabinopyranose mutase activity	cell wall organization Source: UniProtKB-KW plant-type cell wall biogenesis Source: TAIR plant-type cell wall organization or biogenesis Source: UniProtKB pollen development Source: UniProtKB response to salt stress Source: TAIR UDP-L-arabinose metabolic process	pep:novel chromosome:IWGSC1.0+popseq:4B:152951104:152953440:-1 gene:Traes_4BS_3C044B05F transcript:Traes_4BS_3C044B05F.1	42 kDa	1	0	[]
Traes_4BS_5D060446C.1	actin binding Source: UniProtKB-KW adenylate cyclase binding	actin cytoskeleton organization Source: TAIR actin polymerization or depolymerization Source: GO_Central establishment or maintenance of cell polarity Source: GO_Central regulation of adenylate cyclase activity Source: GO_Central signal transduction Source: GO_Central unidimensional cell growth	pep:novel chromosome:IWGSC1.0+popseq:4B:30933759:30941300:1 gene:Traes_4BS_5D060446C transcript:Traes_4BS_5D060446C.1 description:"cyclase associated protein 1"	57 kDa	1	0	[]
Traes_4BS_6020E30BF.2	3 iron, 4 sulfur cluster binding Source: UniProtKB-KW 4-hydroxy-3-methylbut-2-en-1-yl diphosphate reductase activity Source: InterPro 4-hydroxy-3-methylbut-2-en-1-yl diphosphate synthase activity Source: TAIR metal ion binding	dimethylallyl diphosphate biosynthetic process Source: UniProtKB-UniPathway isopentenyl diphosphate biosynthetic process, methylerythritol 4-phosphate pathway	pep:novel chromosome:IWGSC1.0+popseq:4B:56423480:56427999:-1 gene:Traes_4BS_6020E30BF transcript:Traes_4BS_6020E30BF.2 description:"4-hydroxy-3-methylbut-2-enyl diphosphate reductase"	52 kDa	1	0	[]
Traes_4BS_615DE1514.1	glutathione transferase activity	glutathione metabolic process Source: GO_Central toxin catabolic process	pep:known scaffold:IWGSC1.0+popseq:IWGSC_CSS_4BS_scaff_4963302:11242:12542:-1 gene:Traes_4BS_615DE1514 transcript:Traes_4BS_615DE1514.1 description:"Glutathione S-transferase 1 "	26 kDa	1	0	[]
Traes_4BS_7C5E57EDB.1	copper ion binding	photorespiration	pep:novel chromosome:IWGSC1.0+popseq:4B:1630475:1634345:-1 gene:Traes_4BS_7C5E57EDB transcript:Traes_4BS_7C5E57EDB.1	19 kDa	1	0	[]
Traes_4BS_8A8575A05.1	structural molecule activity	ER to Golgi vesicle-mediated transport Source: GO_Central intracellular protein transport Source: GO_Central intra-Golgi vesicle-mediated transport Source: GO_Central retrograde vesicle-mediated transport, Golgi to ER	pep:novel chromosome:IWGSC1.0+popseq:4B:14845879:14850875:-1 gene:Traes_4BS_8A8575A05 transcript:Traes_4BS_8A8575A05.1	132 kDa	1	0	[]
Traes_4BS_9765C2234.2	ARF guanyl-nucleotide exchange factor activity Source: UniProtKB identical protein binding Source: IntAct protein homodimerization activity	basipetal auxin transport Source: TAIR cell adhesion Source: TAIR cell wall organization Source: TAIR cytokinesis by cell plate formation Source: TAIR embryo development ending in seed dormancy Source: TAIR embryonic pattern specification Source: TAIR endocytosis Source: TAIR endosome transport via multivesicular body sorting pathway Source: UniProtKB establishment of planar polarity Source: TAIR…	pep:novel chromosome:IWGSC1.0+popseq:4B:5038936:5043965:1 gene:Traes_4BS_9765C2234 transcript:Traes_4BS_9765C2234.2	131 kDa	1	0	[]
Traes_4BS_A1CB7E67A.2	kinase activity Source: UniProtKB-KW magnesium ion binding Source: InterPro potassium ion binding Source: InterPro pyruvate kinase activity	glycolytic process	pep:novel chromosome:IWGSC1.0+popseq:4B:168169269:168175218:-1 gene:Traes_4BS_A1CB7E67A transcript:Traes_4BS_A1CB7E67A.2	52 kDa	1	0	[]
Traes_4BS_A5F651D85.1	serine-type endopeptidase activity	mucilage extrusion from seed coat Source: TAIR mucilage metabolic process involved in seed coat development Source: TAIR seed coat development	pep:novel chromosome:IWGSC1.0+popseq:4B:75937014:75940207:1 gene:Traes_4BS_A5F651D85 transcript:Traes_4BS_A5F651D85.1	79 kDa	1	0	[]
Traes_4BS_B5519C4BF.2	4 iron, 4 sulfur cluster binding Source: UniProtKB-KW ATPase activity Source: InterPro ATP binding Source: GO_Central iron ion binding Source: GO_Central ribosomal small subunit binding Source: GO_Central transporter activity	ribosomal subunit export from nucleus Source: GO_Central translational initiation Source: GO_Central translational termination	pep:novel chromosome:IWGSC1.0+popseq:4B:207769102:207775641:1 gene:Traes_4BS_B5519C4BF transcript:Traes_4BS_B5519C4BF.2	68 kDa	1	0	[]
Traes_4DL_0B1ABB56F.2	ATP binding Source: TAIR copper ion binding Source: TAIR protein binding involved in protein folding Source: GO_Central structural constituent of ribosome Source: CAFA unfolded protein binding	de novo' protein folding Source: GO_Central chaperone-mediated protein folding Source: GO_Central mitochondrion organization Source: TAIR protein import into mitochondrial intermembrane space Source: GO_Central protein refolding Source: InterPro response to cadmium ion Source: TAIR response to heat	pep:novel scaffold:IWGSC1.0+popseq:IWGSC_CSS_4DL_scaff_14342299:662:5863:-1 gene:Traes_4DL_0B1ABB56F transcript:Traes_4DL_0B1ABB56F.2	70 kDa	1	0	[]
Traes_4DL_0DA7ADE7E.1		response to heat	pep:novel chromosome:IWGSC1.0+popseq:4D:32654577:32655575:-1 gene:Traes_4DL_0DA7ADE7E transcript:Traes_4DL_0DA7ADE7E.1	18 kDa	1	0	[]
Traes_4DL_38A330258.2	transferase activity, transferring glycosyl groups		pep:novel chromosome:IWGSC1.0+popseq:4D:81390974:81396162:-1 gene:Traes_4DL_38A330258 transcript:Traes_4DL_38A330258.2	132 kDa	1	0	[]
Traes_4DL_74159402F.2	mRNA binding		pep:novel chromosome:IWGSC1.0+popseq:4D:11606538:11612003:-1 gene:Traes_4DL_74159402F transcript:Traes_4DL_74159402F.2	78 kDa	1	0	[]
Traes_4DL_826C61525.1	alanine-tRNA ligase activity Source: GO_Central amino acid binding Source: GO_Central ATP binding Source: UniProtKB-KW metal ion binding Source: UniProtKB-KW tRNA binding	alanyl-tRNA aminoacylation Source: GO_Central response to cadmium ion Source: TAIR tRNA modification	pep:novel scaffold:IWGSC1.0+popseq:IWGSC_CSS_4DL_scaff_14329625:324:6080:-1 gene:Traes_4DL_826C61525 transcript:Traes_4DL_826C61525.1	66 kDa	1	0	[]
Traes_4DL_8CE055F15.1	cytochrome-c peroxidase activity Source: GO_Central heme binding Source: InterPro L-ascorbate peroxidase activity Source: TAIR metal ion binding	cellular response to oxidative stress Source: GO_Central embryo development ending in seed dormancy Source: TAIR hydrogen peroxide catabolic process Source: TAIR response to cadmium ion Source: TAIR response to cytokinin Source: TAIR response to heat Source: TAIR response to reactive oxygen species Source: TAIR response to salt stress	pep:novel chromosome:IWGSC1.0+popseq:4D:94036880:94039798:1 gene:Traes_4DL_8CE055F15 transcript:Traes_4DL_8CE055F15.1	27 kDa	1	0	[]
Traes_4DL_A8B1C1ADE.1	copper ion binding Source: TAIR glutathione binding Source: TAIR glutathione transferase activity	glutathione metabolic process Source: GO_Central response to cadmium ion Source: TAIR response to water deprivation Source: TAIR toxin catabolic process	pep:novel chromosome:IWGSC1.0+popseq:4D:116970100:116971288:-1 gene:Traes_4DL_A8B1C1ADE transcript:Traes_4DL_A8B1C1ADE.1	26 kDa	1	0	[]
Traes_4DL_B39DDFB61.1	flavonol synthase activity Source: TAIR L-ascorbic acid binding Source: UniProtKB-KW metal ion binding Source: UniProtKB-KW naringenin 3-dioxygenase activity	flavonoid biosynthetic process Source: TAIR response to auxin Source: TAIR response to karrikin	pep:novel chromosome:IWGSC1.0+popseq:4D:120566244:120567618:-1 gene:Traes_4DL_B39DDFB61 transcript:Traes_4DL_B39DDFB61.1	26 kDa	1	0	[]
Traes_4DL_B70EAE46C.1	4-hydroxy-tetrahydrodipicolinate reductase	lysine biosynthetic process via diaminopimelate Source: InterPro photosynthesis, light reaction	pep:novel scaffold:IWGSC1.0+popseq:IWGSC_CSS_4DL_scaff_14464513:8320:11062:-1 gene:Traes_4DL_B70EAE46C transcript:Traes_4DL_B70EAE46C.1 description:"Dihydrodipicolinate reductase, bacterial/plant"	36 kDa	1	0	[]
Traes_4DL_BCCE5731E.2	protein domain specific binding		pep:novel scaffold:IWGSC1.0+popseq:IWGSC_CSS_4DL_scaff_14334917:2381:6427:-1 gene:Traes_4DL_BCCE5731E transcript:Traes_4DL_BCCE5731E.2	25 kDa	1	0	[]
Traes_4DL_EDE7DDD20.2	heme binding Source: InterPro metal ion binding Source: UniProtKB-KW peroxidase activity	defense response to nematode Source: TAIR flower development Source: TAIR hydrogen peroxide catabolic process Source: UniProtKB-KW response to oxidative stress	pep:novel chromosome:IWGSC1.0+popseq:4D:28123294:28128237:-1 gene:Traes_4DL_EDE7DDD20 transcript:Traes_4DL_EDE7DDD20.2	34 kDa	1	0	[]
Traes_4DL_EE41B3B56.1	sinapoylglucose-choline O-sinapoyltransferase activity Source: UniProtKB-EC sinapoyltransferase activity	proteolysis Source: InterPro secondary metabolic process	pep:novel chromosome:IWGSC1.0+popseq:4D:118909614:118914300:-1 gene:Traes_4DL_EE41B3B56 transcript:Traes_4DL_EE41B3B56.1	53 kDa	1	0	[]
Traes_4DL_F2EFCED0C.2	?	?	pep:novel chromosome:IWGSC1.0+popseq:4D:107129512:107131742:1 gene:Traes_4DL_F2EFCED0C transcript:Traes_4DL_F2EFCED0C.2	40 kDa	1	0	[]
Traes_4DS_084803084.1	4-methylumbelliferyl-beta-D-glucopyranoside beta-glucosidase activity Source: TAIR amygdalin beta-glucosidase activity Source: TAIR beta-gentiobiose beta-glucosidase activity Source: TAIR beta-glucosidase activity Source: UniProtKB beta-mannosidase activity Source: UniProtKB cellobiose glucosidase activity Source: TAIR esculin beta-glucosidase activity Source: TAIR metal ion binding Source: UniPr…	carbohydrate metabolic process Source: InterPro glycosyl compound metabolic process	pep:novel scaffold:IWGSC1.0+popseq:IWGSC_CSS_4DS_scaff_2297156:404:3158:1 gene:Traes_4DS_084803084 transcript:Traes_4DS_084803084.1	47 kDa	1	0	[]
Traes_4DS_1860220B9.1	2-carboxy-D-arabinitol-1-phosphatase activity		pep:novel chromosome:IWGSC1.0+popseq:4D:9614204:9617570:1 gene:Traes_4DS_1860220B9 transcript:Traes_4DS_1860220B9.1 description:"2-carboxy-D-arabinitol-1-phosphatase"	54 kDa	1	0	[]
Traes_4DS_2B5A9846B.2	metal ion binding Source: UniProtKB-KW oxidoreductase activity		pep:novel scaffold:IWGSC1.0+popseq:IWGSC_CSS_4DS_scaff_2289270:2551:4137:1 gene:Traes_4DS_2B5A9846B transcript:Traes_4DS_2B5A9846B.2	41 kDa	1	0	[]
Traes_4DS_32616696E.1	aminomethyltransferase activity Source: UniProtKB-EC transaminase activity	glycine catabolic process	pep:novel scaffold:IWGSC1.0+popseq:IWGSC_CSS_4DS_scaff_2205044:39:435:1 gene:Traes_4DS_32616696E transcript:Traes_4DS_32616696E.1	13 kDa	1	0	[]
Traes_4DS_3A7960FAC.2	GTPase activity Source: InterPro GTP binding Source: UniProtKB-KW structural constituent of cytoskeleton	cellular response to gravity Source: TAIR microtubule cytoskeleton organization Source: TAIR response to salt stress	pep:novel chromosome:IWGSC1.0+popseq:4D:1132471:1134908:1 gene:Traes_4DS_3A7960FAC transcript:Traes_4DS_3A7960FAC.2	50 kDa	1	0	[]
Traes_4DS_3CD86327C.1	aminopeptidase activity Source: TAIR metalloaminopeptidase activity Source: GO_Central N-1-naphthylphthalamic acid binding Source: UniProtKB peptide binding Source: GO_Central zinc ion binding	auxin polar transport Source: TAIR peptide catabolic process	pep:novel scaffold:IWGSC1.0+popseq:IWGSC_CSS_4DS_scaff_2323695:2340:10181:1 gene:Traes_4DS_3CD86327C transcript:Traes_4DS_3CD86327C.1	98 kDa	1	0	[]
Traes_4DS_6E967C582.1		embryo development ending in seed dormancy Source: TAIR lateral root formation Source: TAIR leaf development Source: TAIR leaf vascular tissue pattern formation Source: TAIR meristem growth Source: TAIR meristem maintenance Source: TAIR post-embryonic plant organ development Source: TAIR regulation of auxin polar transport Source: TAIR root meristem growth	pep:novel chromosome:IWGSC1.0+popseq:4D:7495345:7499033:1 gene:Traes_4DS_6E967C582 transcript:Traes_4DS_6E967C582.1	64 kDa	1	0	[]
Traes_4DS_71829BA26.1	calcium ion binding Source: InterPro poly(U) RNA binding	photoinhibition Source: TAIR photosynthesis, light reaction Source: TAIR photosystem II assembly Source: TAIR photosystem II stabilization Source: TAIR regulation of protein dephosphorylation	pep:novel scaffold:IWGSC1.0+popseq:IWGSC_CSS_4DS_scaff_2268879:2:745:1 gene:Traes_4DS_71829BA26 transcript:Traes_4DS_71829BA26.1 description:"photosystem II subunit O-2"	24 kDa	1	0	[]
Traes_4DS_87B8E3A55.1	heme binding Source: InterPro iron ion binding Source: InterPro oxidoreductase activity, acting on paired donors, with incorporation or reduction of molecular oxygen, NAD(P)H as one donor, and incorporation of one atom of oxygen	secondary metabolite biosynthetic process	pep:novel scaffold:IWGSC1.0+popseq:IWGSC_CSS_4DS_scaff_2300869:2837:4658:-1 gene:Traes_4DS_87B8E3A55 transcript:Traes_4DS_87B8E3A55.1	58 kDa	1	0	[]
Traes_4DS_88D2821C6.2	metal ion binding Source: UniProtKB-KW RNA binding	defense response, incompatible interaction Source: TAIR gene silencing by RNA Source: UniProtKB-KW regulation of transcription, DNA-templated Source: UniProtKB-KW regulation of translation Source: UniProtKB-KW response to virus Source: TAIR transcription, DNA-templated Source: UniProtKB-KW viral gene silencing in virus induced gene silencing	pep:novel scaffold:IWGSC1.0+popseq:IWGSC_CSS_4DS_scaff_2318247:117:6407:1 gene:Traes_4DS_88D2821C6 transcript:Traes_4DS_88D2821C6.2	103 kDa	1	0	[]
Traes_4DS_990D31BB1.6	DNA binding transcription factor activity Source: GO_Central metal ion binding Source: UniProtKB-KW protein dimerization activity Source: InterPro RNA polymerase II regulatory region sequence-specific DNA binding	post-embryonic development Source: TAIR regulation of transcription by RNA polymerase II Source: GO_Central transcription, DNA-templated	pep:novel chromosome:IWGSC1.0+popseq:4D:446551:450593:-1 gene:Traes_4DS_990D31BB1 transcript:Traes_4DS_990D31BB1.6	83 kDa	1	0	[]
Traes_4DS_AFB7DD996.1	structural constituent of ribosome	translation	pep:novel scaffold:IWGSC1.0+popseq:IWGSC_CSS_4DS_scaff_2157064:20:208:-1 gene:Traes_4DS_AFB7DD996 transcript:Traes_4DS_AFB7DD996.1 description:"Ribosomal protein S30 family protein"	7 kDa	1	0	[]
Traes_4DS_B083FBC2F.2	?	?	pep:novel scaffold:IWGSC1.0+popseq:IWGSC_CSS_4DS_scaff_2319665:3411:8737:1 gene:Traes_4DS_B083FBC2F transcript:Traes_4DS_B083FBC2F.2	88 kDa	1	0	[]
Traes_4DS_C874E8B66.1	?	?	pep:novel scaffold:IWGSC1.0+popseq:IWGSC_CSS_4DS_scaff_2314749:2330:7130:-1 gene:Traes_4DS_C874E8B66 transcript:Traes_4DS_C874E8B66.1	48 kDa	1	0	[]
Traes_5AL_04C632507.1 (+1)	peptidyl-prolyl cis-trans isomerase activity		pep:novel chromosome:IWGSC1.0+popseq:5A:65605526:65610159:-1 gene:Traes_5AL_04C632507 transcript:Traes_5AL_04C632507.1 description:"FKBP-like peptidyl-prolyl cis-trans isomerase family protein"	19 kDa	1	0	[]
Traes_5AL_1311205EE.2	kinase activity	auxin polar transport Source: TAIR cell fate specification Source: TAIR embryo development ending in seed dormancy Source: TAIR leaf vascular tissue pattern formation Source: TAIR root development Source: TAIR stem cell population maintenance	pep:novel scaffold:IWGSC1.0+popseq:IWGSC_CSS_5AL_scaff_2741239:26:11706:1 gene:Traes_5AL_1311205EE transcript:Traes_5AL_1311205EE.2	261 kDa	1	0	[]
Traes_5AL_175C27AC1.1 (+1)	ATP binding Source: UniProtKB-KW pantothenate kinase activity	coenzyme A biosynthetic process	pep:novel chromosome:IWGSC1.0+popseq:5A:91647456:91656702:1 gene:Traes_5AL_175C27AC1 transcript:Traes_5AL_175C27AC1.1	88 kDa	1	0	[]
Traes_5AL_2A429B70E.3 (+1)		regulation of phosphorylation Source: TAIR response to cadmium ion	pep:novel chromosome:IWGSC1.0+popseq:5A:16810945:16817066:1 gene:Traes_5AL_2A429B70E transcript:Traes_5AL_2A429B70E.3	66 kDa	1	0	[]
Traes_5AL_3B1FFF708.1 (+2)	mRNA binding Source: TAIR structural constituent of ribosome	ribosome biogenesis Source: GO_Central translation	pep:novel chromosome:IWGSC1.0+popseq:5A:42881659:42883317:1 gene:Traes_5AL_3B1FFF708 transcript:Traes_5AL_3B1FFF708.1	14 kDa	1	0	[]
Traes_5AL_699E73832.1	polygalacturonate 4-alpha-galacturonosyltransferase activity	cell wall organization Source: UniProtKB-KW pectin biosynthetic process	pep:novel chromosome:IWGSC1.0+popseq:5A:73707488:73709971:1 gene:Traes_5AL_699E73832 transcript:Traes_5AL_699E73832.1	53 kDa	1	0	[]
Traes_5AL_81745FA28.1 (+2)	ATP binding Source: UniProtKB-KW DNA binding Source: UniProtKB-KW lysine-tRNA ligase activity Source: TAIR metal ion binding	lysyl-tRNA aminoacylation	pep:novel scaffold:IWGSC1.0+popseq:IWGSC_CSS_5AL_scaff_2773945:1:3932:1 gene:Traes_5AL_81745FA28 transcript:Traes_5AL_81745FA28.1	49 kDa	1	0	[]
Traes_5AL_982F18037.1 (+3)	cobalt ion binding	cytidine to uridine editing Source: TAIR mitochondrial mRNA modification Source: TAIR mRNA processing Source: UniProtKB-KW RNA modification	pep:novel chromosome:IWGSC1.0+popseq:5A:94157543:94160447:1 gene:Traes_5AL_982F18037 transcript:Traes_5AL_982F18037.1	29 kDa	1	0	[]
Traes_5AL_9873DB737.1 (+2)	spermidine synthase activity Source: TAIR spermine synthase activity	defense response to bacterium Source: TAIR polyamine biosynthetic process Source: TAIR spermine biosynthetic process	pep:novel chromosome:IWGSC1.0+popseq:5A:1598677:1606018:-1 gene:Traes_5AL_9873DB737 transcript:Traes_5AL_9873DB737.1	42 kDa	1	0	[]
Traes_5AL_A31752177.1	NADH dehydrogenase activity	ubiquinone-6 biosynthetic process	pep:novel scaffold:IWGSC1.0+popseq:IWGSC_CSS_5AL_scaff_2786358:8147:15146:-1 gene:Traes_5AL_A31752177 transcript:Traes_5AL_A31752177.1	18 kDa	1	0	[]
Traes_5AL_A33DF5E3A.1	triose-phosphate isomerase activity	chloroplast organization Source: TAIR gluconeogenesis Source: GO_Central glyceraldehyde-3-phosphate biosynthetic process Source: TAIR glycerol catabolic process Source: TAIR glycolytic process Source: GO_Central multicellular organism reproduction Source: TAIR primary root development Source: TAIR reductive pentose-phosphate cycle Source: UniProtKB-UniPathway triglyceride mobilization	pep:novel chromosome:IWGSC1.0+popseq:5A:91906169:91909445:1 gene:Traes_5AL_A33DF5E3A transcript:Traes_5AL_A33DF5E3A.1 description:"triosephosphate isomerase"	26 kDa	1	0	[]
Traes_5AL_B446A0742.2 (+3)	lipid binding	lipid transport Source: GO_Central response to abscisic acid Source: TAIR response to water deprivation	pep:novel scaffold:IWGSC1.0+popseq:IWGSC_CSS_5AL_scaff_2800777:1175:1548:-1 gene:Traes_5AL_B446A0742 transcript:Traes_5AL_B446A0742.2 description:"Basic protein 2 "	11 kDa	1	0	[]
Traes_5AL_CBDD170E1.1	enzyme regulator activity	regulation of protein catabolic process	pep:novel scaffold:IWGSC1.0+popseq:IWGSC_CSS_5AL_scaff_2741002:666:2924:1 gene:Traes_5AL_CBDD170E1 transcript:Traes_5AL_CBDD170E1.1	45 kDa	1	0	[]
Traes_5AL_D0F5C42A0.1 (+2)	ATP binding Source: UniProtKB-KW ubiquitin protein ligase activity Source: GO_Central ubiquitin protein ligase binding Source: GO_Central ubiquitin-protein transferase activity	postreplication repair Source: TAIR protein K63-linked ubiquitination Source: GO_Central response to cadmium ion Source: TAIR response to iron ion Source: TAIR root epidermal cell differentiation Source: TAIR ubiquitin-dependent protein catabolic process	pep:novel chromosome:IWGSC1.0+popseq:5A:40469587:40472729:-1 gene:Traes_5AL_D0F5C42A0 transcript:Traes_5AL_D0F5C42A0.1	17 kDa	1	0	[]
Traes_5AL_D61277B17.1	endonuclease activity Source: GO_Central RNA binding	RNA modification	pep:novel scaffold:IWGSC1.0+popseq:IWGSC_CSS_5AL_scaff_570756:3:1619:1 gene:Traes_5AL_D61277B17 transcript:Traes_5AL_D61277B17.1	54 kDa	1	0	[]
Traes_5AL_EC4DA5C79.1	?	?	pep:novel scaffold:IWGSC1.0+popseq:IWGSC_CSS_5AL_scaff_2696999:331:1788:-1 gene:Traes_5AL_EC4DA5C79 transcript:Traes_5AL_EC4DA5C79.1 description:"Rhodanese/Cell cycle control phosphatase superfamily protein"	19 kDa	1	0	[]
Traes_5AL_F34FE4046.1 (+1)	?	?	pep:novel chromosome:IWGSC1.0+popseq:5A:88911886:88916180:-1 gene:Traes_5AL_F34FE4046 transcript:Traes_5AL_F34FE4046.1 description:"Rhodanese/Cell cycle control phosphatase superfamily protein"	26 kDa	1	0	[]
Traes_5AS_8B47CD37E.1 (+1)	protein-lysine N-methyltransferase activity	peptidyl-lysine monomethylation	pep:novel scaffold:IWGSC1.0+popseq:IWGSC_CSS_5AS_scaff_1503014:1815:4129:-1 gene:Traes_5AS_8B47CD37E transcript:Traes_5AS_8B47CD37E.1	28 kDa	1	0	[]
Traes_5AS_A2715CBB2.2 (+1)	3'(2'),5'-bisphosphate nucleotidase activity Source: UniProtKB-EC inositol-1,4-bisphosphate 1-phosphatase activity Source: UniProtKB-EC metal ion binding	abscisic acid-activated signaling pathway Source: UniProtKB-KW phosphatidylinositol phosphorylation Source: InterPro sulfur compound metabolic process	pep:novel scaffold:IWGSC1.0+popseq:IWGSC_CSS_5AS_scaff_1552092:5149:9246:-1 gene:Traes_5AS_A2715CBB2 transcript:Traes_5AS_A2715CBB2.2	40 kDa	1	0	[]
Traes_5AS_D71CD62EA.1		protein ubiquitination Source: GO_Central regulation of transcription, DNA-templated Source: UniProtKB-KW response to auxin Source: TAIR SCF complex assembly Source: GO_Central transcription, DNA-templated Source: UniProtKB-KW vegetative to reproductive phase transition of meristem Source: TAIR xylem and phloem pattern formation	pep:novel scaffold:IWGSC1.0+popseq:IWGSC_CSS_5AS_scaff_1547400:1297:10652:1 gene:Traes_5AS_D71CD62EA transcript:Traes_5AS_D71CD62EA.1	134 kDa	1	0	[]
Traes_5AS_E73817521.1	?	?	pep:novel chromosome:IWGSC1.0+popseq:5A:24005965:24016007:1 gene:Traes_5AS_E73817521 transcript:Traes_5AS_E73817521.1	129 kDa	1	0	[]
Traes_5BL_05CB31C25.1	ATP binding Source: UniProtKB-KW protein kinase activity		pep:novel chromosome:IWGSC1.0+popseq:5B:102774885:102777324:-1 gene:Traes_5BL_05CB31C25 transcript:Traes_5BL_05CB31C25.1	70 kDa	1	0	[]
Traes_5BL_115EEC911.1 (+1)	zinc ion binding	COPII-coated vesicle budding Source: InterPro intracellular protein transport	pep:novel chromosome:IWGSC1.0+popseq:5B:172689941:172696899:1 gene:Traes_5BL_115EEC911 transcript:Traes_5BL_115EEC911.1	84 kDa	1	0	[]
Traes_5BL_1FEE55AB1.1 (+2)		protein import into nucleus	pep:novel chromosome:IWGSC1.0+popseq:5B:187514045:187516006:1 gene:Traes_5BL_1FEE55AB1 transcript:Traes_5BL_1FEE55AB1.1	13 kDa	1	0	[]
Traes_5BL_251DEC80A.1		heat acclimation Source: TAIR response to heat Source: TAIR response to high light intensity Source: TAIR response to hydrogen peroxide	pep:novel scaffold:IWGSC1.0+popseq:IWGSC_CSS_5BL_scaff_10803645:13516:14488:1 gene:Traes_5BL_251DEC80A transcript:Traes_5BL_251DEC80A.1	26 kDa	1	0	[]
Traes_5BL_28CCE5325.2		protein transport	pep:novel chromosome:IWGSC1.0+popseq:5B:186694260:186696945:1 gene:Traes_5BL_28CCE5325 transcript:Traes_5BL_28CCE5325.2 description:"NAD(P)-binding Rossmann-fold superfamily protein"	57 kDa	1	0	[]
Traes_5BL_2C3037F54.1		protein transport Source: UniProtKB-KW vacuolar transport	pep:novel chromosome:IWGSC1.0+popseq:5B:213927210:213931823:-1 gene:Traes_5BL_2C3037F54 transcript:Traes_5BL_2C3037F54.1 description:"SNF7 family protein"	33 kDa	1	0	[]
Traes_5BL_2C797FB98.2	DNA binding	nucleosome assembly	pep:novel chromosome:IWGSC1.0+popseq:5B:243263821:243265301:1 gene:Traes_5BL_2C797FB98 transcript:Traes_5BL_2C797FB98.2	29 kDa	1	0	[]
Traes_5BL_4FEA379DF1.1	glucuronoxylan 4-O-methyltransferase activity	xylan biosynthetic process Source: InterPro xylan metabolic process	pep:novel scaffold:IWGSC1.0+popseq:IWGSC_CSS_5BL_scaff_10916770:1889:3588:-1 gene:Traes_5BL_4FEA379DF1 transcript:Traes_5BL_4FEA379DF1.1	32 kDa	1	0	[]
Traes_5BL_8577E78ED.1	threonine-type endopeptidase activity	ubiquitin-dependent protein catabolic process	pep:novel scaffold:IWGSC1.0+popseq:IWGSC_CSS_5BL_scaff_10788574:39:3244:1 gene:Traes_5BL_8577E78ED transcript:Traes_5BL_8577E78ED.1	21 kDa	1	0	[]
Traes_5BL_881FB6FDE.1	heme binding Source: InterPro metal ion binding Source: UniProtKB-KW peroxidase activity	hydrogen peroxide catabolic process Source: UniProtKB-KW lignin biosynthetic process Source: TAIR response to oxidative stress Source: InterPro vegetative to reproductive phase transition of meristem	pep:novel scaffold:IWGSC1.0+popseq:IWGSC_CSS_5BL_scaff_10739201:6:3217:1 gene:Traes_5BL_881FB6FDE transcript:Traes_5BL_881FB6FDE.1 description:"Peroxidase superfamily protein"	37 kDa	1	0	[]
Traes_5BL_8B7C3A2AD.2		mRNA transport Source: UniProtKB-KW protein transport	pep:novel scaffold:IWGSC1.0+popseq:IWGSC_CSS_5BL_scaff_10895728:716:16744:1 gene:Traes_5BL_8B7C3A2AD transcript:Traes_5BL_8B7C3A2AD.2 description:"embryo defective 3012"	205 kDa	1	0	[]
Traes_5BL_986E607A5.1	?	?	pep:novel chromosome:IWGSC1.0+popseq:5B:239065904:239068851:-1 gene:Traes_5BL_986E607A5 transcript:Traes_5BL_986E607A5.1	25 kDa	1	0	[]
Traes_5BL_9BA86B4B6.1	GTPase activator activity Source: UniProtKB-KW metal ion binding	embryo development ending in seed dormancy Source: TAIR pollen development	pep:novel scaffold:IWGSC1.0+popseq:IWGSC_CSS_5BL_scaff_10789461:1:3498:1 gene:Traes_5BL_9BA86B4B6 transcript:Traes_5BL_9BA86B4B6.1	45 kDa	1	0	[]
Traes_5BL_A1D3A3447.1 (+1)	RNA binding Source: GO_Central structural constituent of ribosome	maturation of SSU-rRNA from tricistronic rRNA transcript (SSU-rRNA, 5.8S rRNA, LSU-rRNA) Source: GO_Central translation	pep:novel chromosome:IWGSC1.0+popseq:5B:88089194:88090267:1 gene:Traes_5BL_A1D3A3447 transcript:Traes_5BL_A1D3A3447.1	17 kDa	1	0	[]
Traes_5BL_A652A05E4.1	FK506 binding Source: GO_Central peptidyl-prolyl cis-trans isomerase activity	chaperone-mediated protein folding	pep:novel chromosome:IWGSC1.0+popseq:5B:181075946:181078116:-1 gene:Traes_5BL_A652A05E4 transcript:Traes_5BL_A652A05E4.1	14 kDa	1	0	[]
Traes_5BL_AB528184A.1	phenylalanine ammonia-lyase activity	cinnamic acid biosynthetic process Source: UniProtKB-UniPathway drought recovery Source: TAIR lignin catabolic process Source: TAIR L-phenylalanine catabolic process Source: InterPro pollen development Source: TAIR response to karrikin Source: TAIR response to oxidative stress Source: TAIR response to UV-B Source: TAIR salicylic acid catabolic process	pep:novel chromosome:IWGSC1.0+popseq:5B:247937984:247940678:-1 gene:Traes_5BL_AB528184A transcript:Traes_5BL_AB528184A.1	76 kDa	1	0	[]
Traes_5BL_BC17E1F6F.1	DNA binding	nucleosome assembly	pep:novel scaffold:IWGSC1.0+popseq:IWGSC_CSS_5BL_scaff_10884900:1352:2292:1 gene:Traes_5BL_BC17E1F6F transcript:Traes_5BL_BC17E1F6F.1	21 kDa	1	0	[]
Traes_5BL_C1F897A4A.1	electron transfer activity Source: InterPro iron-sulfur cluster binding	response to cytokinin	pep:novel chromosome:IWGSC1.0+popseq:5B:191570618:191571479:-1 gene:Traes_5BL_C1F897A4A transcript:Traes_5BL_C1F897A4A.1	6 kDa	1	0	[]
Traes_5BL_CA33BB947.1	glycogen phosphorylase activity Source: GO_Central linear malto-oligosaccharide phosphorylase activity Source: UniProtKB-EC phosphorylase activity Source: TAIR pyridoxal phosphate binding Source: GO_Central SHG alpha-glucan phosphorylase activity	glycogen catabolic process Source: GO_Central response to temperature stimulus Source: TAIR response to water deprivation	pep:novel scaffold:IWGSC1.0+popseq:IWGSC_CSS_5BL_scaff_10925003:7798:14955:-1 gene:Traes_5BL_CA33BB947 transcript:Traes_5BL_CA33BB947.1 description:"Glycosyl transferase, family 35"	94 kDa	1	0	[]
Traes_5BL_D13BDF7FC.1	metal ion binding		pep:novel scaffold:IWGSC1.0+popseq:IWGSC_CSS_5BL_scaff_10857942:1163:2040:1 gene:Traes_5BL_D13BDF7FC transcript:Traes_5BL_D13BDF7FC.1 description:"Stress responsive A/B Barrel Domain"	12 kDa	1	0	[]
Traes_5BL_E220C7864.2 (+1)	GTPase activity Source: InterPro GTP binding	cell wall biogenesis Source: TAIR protein transport	pep:novel chromosome:IWGSC1.0+popseq:5B:258963916:258965755:1 gene:Traes_5BL_E220C7864 transcript:Traes_5BL_E220C7864.2	31 kDa	1	0	[]
Traes_5BL_EC24EEA67.1		response to zinc ion	pep:novel chromosome:IWGSC1.0+popseq:5B:88242630:88244329:-1 gene:Traes_5BL_EC24EEA67 transcript:Traes_5BL_EC24EEA67.1	34 kDa	1	0	[]
Traes_5BL_EDA6C077E.1	mRNA binding Source: GO_Central snRNA binding	mRNA splicing, via spliceosome	pep:novel chromosome:IWGSC1.0+popseq:5B:197652102:197655581:1 gene:Traes_5BL_EDA6C077E transcript:Traes_5BL_EDA6C077E.1 description:"RNA-binding (RRM/RBD/RNP motifs) family protein"	53 kDa	1	0	[]
Traes_5BL_F421A6446.2	actin binding	actin filament depolymerization	pep:novel scaffold:IWGSC1.0+popseq:IWGSC_CSS_5BL_scaff_10918238:1:1863:1 gene:Traes_5BL_F421A6446 transcript:Traes_5BL_F421A6446.2	13 kDa	1	0	[]
Traes_5BS_06FF08B85.1	?	?	pep:novel scaffold:IWGSC1.0+popseq:IWGSC_CSS_5BS_scaff_2273588:3723:9954:-1 gene:Traes_5BS_06FF08B85 transcript:Traes_5BS_06FF08B85.1	75 kDa	1	0	[]
Traes_5BS_097876F2E.1	L-alanine:2-oxoglutarate aminotransferase activity Source: UniProtKB-EC pyridoxal phosphate binding	biosynthetic process Source: InterPro L-alanine catabolic process Source: UniProtKB-UniPathway response to hypoxia	pep:novel chromosome:IWGSC1.0+popseq:5B:54854183:54857019:1 gene:Traes_5BS_097876F2E transcript:Traes_5BS_097876F2E.1	37 kDa	1	0	[]
Traes_5BS_1CC125F95.2	ribonuclease activity Source: TAIR structural constituent of ribosome Source: CAFA threonine-type endopeptidase activity	proteasome-mediated ubiquitin-dependent protein catabolic process Source: InterPro response to cadmium ion	pep:novel scaffold:IWGSC1.0+popseq:IWGSC_CSS_5BS_scaff_2273181:270:1749:1 gene:Traes_5BS_1CC125F95 transcript:Traes_5BS_1CC125F95.2	12 kDa	1	0	[]
Traes_5BS_26A43A8A0.1	RNA binding Source: GO_Central structural constituent of ribosome	cytoplasmic translation	pep:novel chromosome:IWGSC1.0+popseq:5B:18812341:18815101:1 gene:Traes_5BS_26A43A8A0 transcript:Traes_5BS_26A43A8A0.1	13 kDa	1	0	[]
Traes_5BS_3EE61E0AC.1	ATP binding Source: UniProtKB-KW ATP-dependent peptidase activity	chloroplast organization Source: TAIR protein import into chloroplast stroma Source: TAIR protein targeting to chloroplast Source: TAIR regulation of chlorophyll biosynthetic process Source: TAIR response to cytokinin	pep:novel scaffold:IWGSC1.0+popseq:IWGSC_CSS_5BS_scaff_504662:191:1669:1 gene:Traes_5BS_3EE61E0AC transcript:Traes_5BS_3EE61E0AC.1	44 kDa	1	0	[]
Traes_5BS_4B7CBAE3F.2	ATPase activity Source: GO_Central ATP binding Source: UniProtKB-KW microtubule binding Source: InterPro microtubule motor activity	cytokinesis by cell plate formation Source: TAIR microtubule-based movement Source: GO_Central mitotic cytokinesis	pep:novel scaffold:IWGSC1.0+popseq:IWGSC_CSS_5BS_scaff_2251204:2199:15700:-1 gene:Traes_5BS_4B7CBAE3F transcript:Traes_5BS_4B7CBAE3F.2 description:"phragmoplast orienting kinesin 2"	331 kDa	1	0	[]
Traes_5BS_965D5D9A4.1 (+1)	DNA binding Source: GO_Central protein heterodimerization activity	chromatin silencing	pep:novel scaffold:IWGSC1.0+popseq:IWGSC_CSS_5BS_scaff_2297621:16154:17070:-1 gene:Traes_5BS_965D5D9A4 transcript:Traes_5BS_965D5D9A4.1	14 kDa	1	0	[]
Traes_5BS_F8C1EF344.2 (+1)		protein transport Source: UniProtKB-KW vesicle docking involved in exocytosis	pep:novel chromosome:IWGSC1.0+popseq:5B:36541885:36543904:1 gene:Traes_5BS_F8C1EF344 transcript:Traes_5BS_F8C1EF344.2	68 kDa	1	0	[]
Traes_5DL_1F44EFC2C.1	chlorophyll binding Source: UniProtKB-KW pigment binding Source: GO_Central protein domain specific binding	photosynthesis, light harvesting in photosystem I Source: GO_Central protein-chromophore linkage Source: UniProtKB-KW response to light stimulus	pep:novel chromosome:IWGSC1.0+popseq:5D:142957633:142958842:-1 gene:Traes_5DL_1F44EFC2C transcript:Traes_5DL_1F44EFC2C.1	28 kDa	1	0	[]
Traes_5DL_3DEB057E7.1	ATP binding Source: UniProtKB-KW carbohydrate binding Source: UniProtKB-KW protein serine/threonine kinase activity	defense response to oomycetes Source: UniProtKB positive regulation of cell death Source: UniProtKB positive regulation of hydrogen peroxide metabolic process	pep:novel scaffold:IWGSC1.0+popseq:IWGSC_CSS_5DL_scaff_4508379:4324:5789:-1 gene:Traes_5DL_3DEB057E7 transcript:Traes_5DL_3DEB057E7.1	42 kDa	1	0	[]
Traes_5DL_500C66579.1	?	?	pep:novel chromosome:IWGSC1.0+popseq:5D:63045031:63047910:1 gene:Traes_5DL_500C66579 transcript:Traes_5DL_500C66579.1	20 kDa	1	0	[]
Traes_5DL_56FF2F75A.3	?	?	pep:novel chromosome:IWGSC1.0+popseq:5D:122659162:122666480:1 gene:Traes_5DL_56FF2F75A transcript:Traes_5DL_56FF2F75A.3	60 kDa	1	0	[]
Traes_5DL_8056E2830.1	endopeptidase activity Source: GO_Central serine-type peptidase activity		pep:novel scaffold:IWGSC1.0+popseq:IWGSC_CSS_5DL_scaff_4591909:5189:8858:-1 gene:Traes_5DL_8056E2830 transcript:Traes_5DL_8056E2830.1 description:"Peptidase S41 family protein"	55 kDa	1	0	[]
Traes_5DL_82ADC3B3E.1	heme binding Source: InterPro iron ion binding Source: InterPro oxidoreductase activity, acting on paired donors, with incorporation or reduction of molecular oxygen, NAD(P)H as one donor, and incorporation of one atom of oxygen	secondary metabolite biosynthetic process	pep:novel chromosome:IWGSC1.0+popseq:5D:130977421:130979208:1 gene:Traes_5DL_82ADC3B3E transcript:Traes_5DL_82ADC3B3E.1	53 kDa	1	0	[]
Traes_5DL_8B83D1EE0.1	lipase activity	lipid catabolic process	pep:novel chromosome:IWGSC1.0+popseq:5D:155567956:155571877:1 gene:Traes_5DL_8B83D1EE0 transcript:Traes_5DL_8B83D1EE0.1	45 kDa	1	0	[]
Traes_5DL_945C02F34.1	metal ion binding Source: GO_Central ribulose-phosphate 3-epimerase activity	cellular carbohydrate metabolic process Source: GO_Central pentose catabolic process Source: GO_Central pentose-phosphate shunt, non-oxidative branch	pep:novel chromosome:IWGSC1.0+popseq:5D:107447804:107451639:1 gene:Traes_5DL_945C02F34 transcript:Traes_5DL_945C02F34.1	24 kDa	1	0	[]
Traes_5DL_947904CC3.1	peptidyl-prolyl cis-trans isomerase activity		pep:novel scaffold:IWGSC1.0+popseq:IWGSC_CSS_5DL_scaff_4604769:3245:5800:1 gene:Traes_5DL_947904CC3 transcript:Traes_5DL_947904CC3.1 description:"FKBP-like peptidyl-prolyl cis-trans isomerase family protein"	15 kDa	1	0	[]
Traes_5DL_AB1CA60FD.2	DNA binding	nucleosome assembly	pep:novel scaffold:IWGSC1.0+popseq:IWGSC_CSS_5DL_scaff_4556738:1:704:-1 gene:Traes_5DL_AB1CA60FD transcript:Traes_5DL_AB1CA60FD.2	15 kDa	1	0	[]
Traes_5DL_ADE953140.1	ATPase activity Source: GO_Central ATP binding Source: UniProtKB-KW microtubule binding Source: InterPro microtubule motor activity	microtubule-based movement	pep:novel chromosome:IWGSC1.0+popseq:5D:131935186:131943518:-1 gene:Traes_5DL_ADE953140 transcript:Traes_5DL_ADE953140.1 description:"P-loop containing nucleoside triphosphate hydrolases superfamily protein"	135 kDa	1	0	[]
Traes_5DL_AF68D1E45.1	structural constituent of cell wall	cell wall organization	pep:novel scaffold:IWGSC1.0+popseq:IWGSC_CSS_5DL_scaff_4596116:1875:3587:1 gene:Traes_5DL_AF68D1E45 transcript:Traes_5DL_AF68D1E45.1	45 kDa	1	0	[]
Traes_5DL_BA58FDAD6.2	ATPase activity, coupled to transmembrane movement of substances Source: GO_Central ATP binding	abscisic acid transport Source: TAIR defense response to oomycetes Source: UniProtKB drug transmembrane transport Source: TAIR lead ion transport Source: TAIR response to ethylene Source: TAIR response to jasmonic acid Source: TAIR response to ozone Source: TAIR response to salicylic acid Source: TAIR terpenoid transport	pep:novel chromosome:IWGSC1.0+popseq:5D:61403394:61412124:-1 gene:Traes_5DL_BA58FDAD6 transcript:Traes_5DL_BA58FDAD6.2	163 kDa	1	0	[]
Traes_5DL_C8AC411F1.1		multicellular organism development Source: TAIR proteasome-mediated ubiquitin-dependent protein catabolic process Source: GO_Central protein catabolic process	pep:novel chromosome:IWGSC1.0+popseq:5D:158737606:158741510:1 gene:Traes_5DL_C8AC411F1 transcript:Traes_5DL_C8AC411F1.1	51 kDa	1	0	[]
Traes_5DL_D4B0422E9.1	cysteine-type endopeptidase inhibitor activity Source: TAIR serine-type endopeptidase inhibitor activity		pep:known scaffold:IWGSC1.0+popseq:IWGSC_CSS_5DL_scaff_4582376:3387:5907:1 gene:Traes_5DL_D4B0422E9 transcript:Traes_5DL_D4B0422E9.1 description:"Serpin-Z1B "	43 kDa	1	0	[]
Traes_5DL_D9722CD9B.1	sarcosine oxidase activity	tetrahydrofolate metabolic process	pep:novel scaffold:IWGSC1.0+popseq:IWGSC_CSS_5DL_scaff_4507053:2763:4317:-1 gene:Traes_5DL_D9722CD9B transcript:Traes_5DL_D9722CD9B.1	31 kDa	1	0	[]
Traes_5DL_DD9491112.2	chromatin binding Source: TAIR DNA binding Source: TAIR DNA binding transcription factor activity Source: TAIR structural constituent of chromatin	chromatin assembly or disassembly	pep:novel chromosome:IWGSC1.0+popseq:5D:124066298:124067755:1 gene:Traes_5DL_DD9491112 transcript:Traes_5DL_DD9491112.2	14 kDa	1	0	[]
Traes_5DL_F5063699D.2	oxidoreductase activity		pep:novel chromosome:IWGSC1.0+popseq:5D:104104812:104106853:-1 gene:Traes_5DL_F5063699D transcript:Traes_5DL_F5063699D.2	35 kDa	1	0	[]
Traes_5DL_FD04EBB2F.1	2 iron, 2 sulfur cluster binding Source: UniProtKB-KW electron transfer activity Source: InterPro metal ion binding		pep:novel chromosome:IWGSC1.0+popseq:5D:152097136:152099713:1 gene:Traes_5DL_FD04EBB2F transcript:Traes_5DL_FD04EBB2F.1	29 kDa	1	0	[]
Traes_5DS_01D241425.1	N-carbamoylputrescine amidase activity	putrescine biosynthetic process Source: TAIR putrescine biosynthetic process from arginine	Nitrilase-like protein 1	33 kDa	1	0	[]
Traes_5DS_0479C6E0F.1	ADP binding Source: InterPro ATP binding Source: UniProtKB-KW nucleotide binding	plant-type hypersensitive response Source: TAIR signal transduction	pep:novel chromosome:IWGSC1.0+popseq:5D:14652920:14655182:-1 gene:Traes_5DS_0479C6E0F transcript:Traes_5DS_0479C6E0F.1	71 kDa	1	0	[]
Traes_5DS_581B4DB50.1	RNA binding		pep:novel chromosome:IWGSC1.0+popseq:5D:8551357:8551949:-1 gene:Traes_5DS_581B4DB50 transcript:Traes_5DS_581B4DB50.1	7 kDa	1	0	[]
Traes_5DS_610F46B5A.1		Golgi vesicle transport Source: TAIR reciprocal meiotic recombination	pep:novel scaffold:IWGSC1.0+popseq:IWGSC_CSS_5DS_scaff_2430083:1:1296:1 gene:Traes_5DS_610F46B5A transcript:Traes_5DS_610F46B5A.1	30 kDa	1	0	[]
Traes_5DS_76A4D5D4E.2	DNA binding transcription factor activity	auxin-activated signaling pathway Source: UniProtKB-KW response to auxin Source: TAIR transcription, DNA-templated	pep:novel chromosome:IWGSC1.0+popseq:5D:30146467:30150132:-1 gene:Traes_5DS_76A4D5D4E transcript:Traes_5DS_76A4D5D4E.2	36 kDa	1	0	[]
Traes_5DS_94D21BF47.1	?	?	pep:novel scaffold:IWGSC1.0+popseq:IWGSC_CSS_5DS_scaff_908059:310:1617:-1 gene:Traes_5DS_94D21BF47 transcript:Traes_5DS_94D21BF47.1	24 kDa	1	0	[]
Traes_5DS_955830536.2	ATP binding Source: UniProtKB-KW calcium channel activity Source: TAIR calcium-transporting ATPase activity Source: TAIR calmodulin binding Source: UniProtKB-KW metal ion binding		pep:novel chromosome:IWGSC1.0+popseq:5D:66674960:66680248:1 gene:Traes_5DS_955830536 transcript:Traes_5DS_955830536.2	111 kDa	1	0	[]
Traes_5DS_A40B73069.2	?	?	pep:novel chromosome:IWGSC1.0+popseq:5D:97461311:97462713:-1 gene:Traes_5DS_A40B73069 transcript:Traes_5DS_A40B73069.2	16 kDa	1	0	[]
Traes_5DS_B794DCAD0.1	?	?	pep:novel chromosome:IWGSC1.0+popseq:5D:3964555:3969711:-1 gene:Traes_5DS_B794DCAD0 transcript:Traes_5DS_B794DCAD0.1	49 kDa	1	0	[]
Traes_5DS_C2F26C333.2	ATPase activity Source: TAIR ATP binding Source: UniProtKB-KW protein homodimerization activity	chloroplast organization Source: TAIR protein hexamerization Source: TAIR protein import into chloroplast stroma Source: TAIR protein metabolic process	pep:novel scaffold:IWGSC1.0+popseq:IWGSC_CSS_5DS_scaff_797522:24:1323:1 gene:Traes_5DS_C2F26C333 transcript:Traes_5DS_C2F26C333.2	22 kDa	1	0	[]
Traes_5DS_C8A1EC40D.1	ATP binding Source: UniProtKB-KW proton-transporting ATP synthase activity, rotational mechanism Source: InterPro zinc ion binding	ATP synthesis coupled proton transport Source: InterPro defense response to fungus, incompatible interaction Source: TAIR response to cold	pep:novel scaffold:IWGSC1.0+popseq:IWGSC_CSS_5DS_scaff_2760003:1:391:-1 gene:Traes_5DS_C8A1EC40D transcript:Traes_5DS_C8A1EC40D.1	14 kDa	1	0	[]
Traes_5DS_CC0F3E08B.2	chromatin binding		pep:novel chromosome:IWGSC1.0+popseq:5D:72789042:72798511:-1 gene:Traes_5DS_CC0F3E08B transcript:Traes_5DS_CC0F3E08B.2 description:"binding"	95 kDa	1	0	[]
Traes_5DS_EDA1C856E.1	copper ion binding Source: TAIR DNA binding Source: UniProtKB magnesium ion binding Source: InterPro phosphopyruvate hydratase activity	glycolytic process Source: UniProtKB-UniPathway regulation of transcription, DNA-templated Source: UniProtKB-KW response to abscisic acid Source: TAIR response to cadmium ion Source: TAIR response to cold Source: TAIR response to light stimulus Source: TAIR response to salt stress Source: TAIR transcription, DNA-templated	pep:novel chromosome:IWGSC1.0+popseq:5D:8470180:8472653:-1 gene:Traes_5DS_EDA1C856E transcript:Traes_5DS_EDA1C856E.1	11 kDa	1	0	[]
Traes_6AL_1C1EF12E9.2 (+2)	RNA cap binding	mRNA cis splicing, via spliceosome Source: InterPro mRNA splicing, via spliceosome Source: GO_Central primary miRNA processing Source: TAIR RNA metabolic process Source: TAIR RNA splicing, via endonucleolytic cleavage and ligation	pep:novel chromosome:IWGSC1.0+popseq:6A:72609869:72614009:-1 gene:Traes_6AL_1C1EF12E9 transcript:Traes_6AL_1C1EF12E9.2 description:"CAP-binding protein 20"	28 kDa	1	0	[]
Traes_6AL_2063C3615.4	dioxygenase activity Source: UniProtKB-KW lactoylglutathione lyase activity Source: TAIR metal ion binding	methylglyoxal catabolic process to D-lactate via S-lactoyl-glutathione Source: TAIR response to cadmium ion	pep:novel scaffold:IWGSC1.0+popseq:IWGSC_CSS_6AL_scaff_5830561:3272:7416:1 gene:Traes_6AL_2063C3615 transcript:Traes_6AL_2063C3615.4	33 kDa	1	0	[]
Traes_6AL_215C7B97E1.2	heme binding Source: GO_Central steroid binding		pep:novel chromosome:IWGSC1.0+popseq:6A:197521366:197522047:-1 gene:Traes_6AL_215C7B97E1 transcript:Traes_6AL_215C7B97E1.2 description:"membrane-associated progesterone binding protein 2"	11 kDa	1	0	[]
Traes_6AL_38CA87B45.2	microtubule binding		pep:novel scaffold:IWGSC1.0+popseq:IWGSC_CSS_6AL_scaff_5832076:7631:10343:-1 gene:Traes_6AL_38CA87B45 transcript:Traes_6AL_38CA87B45.2	40 kDa	1	0	[]
Traes_6AL_5FC1FDFA8.1	adenosine kinase activity Source: TAIR ATP binding Source: UniProtKB-KW copper ion binding	adenosine salvage Source: TAIR AMP salvage Source: UniProtKB-UniPathway response to cadmium ion Source: TAIR response to trehalose-6-phosphate Source: TAIR viral process	pep:novel chromosome:IWGSC1.0+popseq:6A:98228735:98232178:-1 gene:Traes_6AL_5FC1FDFA8 transcript:Traes_6AL_5FC1FDFA8.1	23 kDa	1	0	[]
Traes_6AL_5FFF73A6E.1	zinc ion binding	metal ion transport Source: InterPro negative regulation of flower development	pep:novel chromosome:IWGSC1.0+popseq:6A:205180677:205182895:1 gene:Traes_6AL_5FFF73A6E transcript:Traes_6AL_5FFF73A6E.1	39 kDa	1	0	[]
Traes_6AL_6AE3C989D.1 (+3)	1-aminocyclopropane-1-carboxylate oxidase activity Source: TAIR L-ascorbic acid binding Source: UniProtKB-KW metal ion binding	cellular response to fatty acid Source: UniProtKB defense response Source: UniProtKB-KW ethylene biosynthetic process Source: TAIR fruit ripening Source: UniProtKB-KW response to fungus	pep:novel scaffold:IWGSC1.0+popseq:IWGSC_CSS_6AL_scaff_5797434:78:1006:1 gene:Traes_6AL_6AE3C989D transcript:Traes_6AL_6AE3C989D.1	23 kDa	1	0	[]
Traes_6AL_BCFC7E2BE1.1 (+1)		electron transport chain Source: InterPro photorespiration	pep:novel chromosome:IWGSC1.0+popseq:6A:86898756:86899813:-1 gene:Traes_6AL_BCFC7E2BE1 transcript:Traes_6AL_BCFC7E2BE1.1	7 kDa	1	0	[]
Traes_6AL_CAC96C59A.1	?	?	pep:novel chromosome:IWGSC1.0+popseq:6A:72944687:72946348:1 gene:Traes_6AL_CAC96C59A transcript:Traes_6AL_CAC96C59A.1	48 kDa	1	0	[]
Traes_6AL_D0239FC38.1 (+2)	intermembrane lipid transfer activity		pep:novel scaffold:IWGSC1.0+popseq:IWGSC_CSS_6AL_scaff_5806336:621:4674:1 gene:Traes_6AL_D0239FC38 transcript:Traes_6AL_D0239FC38.1 description:"glycolipid transfer protein 1"	23 kDa	1	0	[]
Traes_6AL_DF66C56B1.1	voltage-gated ion channel activity	potassium ion transport Source: UniProtKB-KW regulation of ion transmembrane transport	pep:novel scaffold:IWGSC1.0+popseq:IWGSC_CSS_6AL_scaff_5720214:1160:1907:1 gene:Traes_6AL_DF66C56B1 transcript:Traes_6AL_DF66C56B1.1	25 kDa	1	0	[]
Traes_6AL_E0594BF4C.2		cell cycle Source: UniProtKB-KW multicellular organism development Source: UniProtKB-KW response to abscisic acid	pep:novel chromosome:IWGSC1.0+popseq:6A:197619573:197629664:-1 gene:Traes_6AL_E0594BF4C transcript:Traes_6AL_E0594BF4C.2	194 kDa	1	0	[]
Traes_6AL_E5D8E7516.1 (+1)	?	?	pep:novel chromosome:IWGSC1.0+popseq:6A:83351978:83361384:-1 gene:Traes_6AL_E5D8E7516 transcript:Traes_6AL_E5D8E7516.1	184 kDa	1	0	[]
Traes_6AS_0A0B33CEF.1	?	?	pep:novel scaffold:IWGSC1.0+popseq:IWGSC_CSS_6AS_scaff_4360851:397:8552:1 gene:Traes_6AS_0A0B33CEF transcript:Traes_6AS_0A0B33CEF.1	110 kDa	1	0	[]
Traes_6AS_0FDBBF9E9.1 (+2)	thiol-dependent ubiquitin-specific protease activity	endoplasmic reticulum unfolded protein response Source: GO_Central protein deubiquitination Source: GO_Central ubiquitin-dependent ERAD pathway	pep:novel chromosome:IWGSC1.0+popseq:6A:127497223:127501163:1 gene:Traes_6AS_0FDBBF9E9 transcript:Traes_6AS_0FDBBF9E9.1	39 kDa	1	0	[]
Traes_6AS_1610AD6E8.2 (+1)	magnesium ion binding Source: InterPro monooxygenase activity Source: UniProtKB-KW ribulose-bisphosphate carboxylase activity	photorespiration Source: UniProtKB-KW reductive pentose-phosphate cycle Source: UniProtKB-KW response to abscisic acid Source: TAIR response to cadmium ion	pep:novel scaffold:IWGSC1.0+popseq:IWGSC_CSS_6AS_scaff_4369160:251:1607:-1 gene:Traes_6AS_1610AD6E8 transcript:Traes_6AS_1610AD6E8.2	40 kDa	1	0	[]
Traes_6AS_1E7F97CF1.1	ATP binding Source: InterPro protein kinase activity		pep:novel chromosome:IWGSC1.0+popseq:6A:114829934:114832388:1 gene:Traes_6AS_1E7F97CF1 transcript:Traes_6AS_1E7F97CF1.1	24 kDa	1	0	[]
Traes_6AS_2C6AEE680.2	calmodulin binding	cellular response to cold Source: TAIR cellular response to heat Source: TAIR cellular response to unfolded protein Source: TAIR protein folding Source: TAIR response to external biotic stimulus	Ortholog: A member of Arabidopsis BAG (Bcl-2-associated athanogene) proteins, plant homologs of mammalian regulators of apoptosis	34 kDa	1	0	[]
Traes_6AS_3FF5D06F5.2 (+1)	RNA binding	mRNA splicing, via spliceosome Source: TAIR primary miRNA processing Source: TAIR RNA splicing	pep:novel chromosome:IWGSC1.0+popseq:6A:15397483:15399688:-1 gene:Traes_6AS_3FF5D06F5 transcript:Traes_6AS_3FF5D06F5.2	33 kDa	1	0	[]
Traes_6AS_5FBFF66A8.1	peptidase activity Source: UniProtKB-KW ubiquitin conjugating enzyme binding Source: GO_Central ubiquitin protein ligase activity	positive regulation of proteasomal ubiquitin-dependent protein catabolic process Source: GO_Central protein polyubiquitination	pep:novel scaffold:IWGSC1.0+popseq:IWGSC_CSS_6AS_scaff_4427684:933:1739:-1 gene:Traes_6AS_5FBFF66A8 transcript:Traes_6AS_5FBFF66A8.1	31 kDa	1	0	[]
Traes_6AS_80C96A4E5.1 (+1)	oxidoreductase activity	response to cadmium ion	pep:novel chromosome:IWGSC1.0+popseq:6A:12232227:12235658:-1 gene:Traes_6AS_80C96A4E5 transcript:Traes_6AS_80C96A4E5.1	35 kDa	1	0	[]
Traes_6AS_9E38A95CB.1 (+2)	ATP binding Source: UniProtKB-KW ATP-dependent RNA helicase activity Source: GO_Central mRNA binding Source: TAIR translation initiation factor activity	regulation of gene expression Source: GO_Central response to cadmium ion Source: TAIR RNA secondary structure unwinding Source: GO_Central translational initiation	pep:novel chromosome:IWGSC1.0+popseq:6A:32456796:32461570:-1 gene:Traes_6AS_9E38A95CB transcript:Traes_6AS_9E38A95CB.1	47 kDa	1	0	[]
Traes_6AS_A1CD1A773.1	RNA binding Source: GO_Central structural constituent of ribosome	translation	pep:novel chromosome:IWGSC1.0+popseq:6A:9709936:9714682:1 gene:Traes_6AS_A1CD1A773 transcript:Traes_6AS_A1CD1A773.1	32 kDa	1	0	[]
Traes_6AS_A34A8593D.1	copper ion binding Source: TAIR NAD binding Source: TAIR succinate-semialdehyde dehydrogenase (NAD+) activity Source: TAIR succinate-semialdehyde dehydrogenase [NAD(P)+] activity	gamma-aminobutyric acid catabolic process Source: TAIR glutamate decarboxylation to succinate Source: TAIR reactive oxygen species metabolic process Source: TAIR response to heat Source: TAIR response to light stimulus	pep:novel chromosome:IWGSC1.0+popseq:6A:145793836:145802891:-1 gene:Traes_6AS_A34A8593D transcript:Traes_6AS_A34A8593D.1 description:"aldehyde dehydrogenase 5F1"	56 kDa	1	0	[]
Traes_6AS_A883BC2B1.1	structural constituent of cell wall	cell morphogenesis involved in differentiation Source: TAIR cell wall organization Source: UniProtKB-KW trichoblast differentiation Source: TAIR unidimensional cell growth	pep:novel chromosome:IWGSC1.0+popseq:6A:29304797:29306070:-1 gene:Traes_6AS_A883BC2B1 transcript:Traes_6AS_A883BC2B1.1	38 kDa	1	0	[]
Traes_6BL_5587A259C.1	3-cyanoalanine hydratase activity Source: TAIR cyanoalanine nitrilase activity Source: TAIR indole-3-acetonitrile nitrilase activity Source: TAIR nitrilase activity Source: TAIR nitrile hydratase activity	cyanide metabolic process Source: TAIR detoxification of nitrogen compound	pep:novel chromosome:IWGSC1.0+popseq:6B:77354701:77357180:-1 gene:Traes_6BL_5587A259C transcript:Traes_6BL_5587A259C.1	34 kDa	1	0	[]
Traes_6BL_5AADEF8D0.1	double-stranded RNA binding		pep:novel chromosome:IWGSC1.0+popseq:6B:188563160:188564127:-1 gene:Traes_6BL_5AADEF8D0 transcript:Traes_6BL_5AADEF8D0.1	25 kDa	1	0	[]
Traes_6BL_B599E4710.1		mitotic spindle assembly checkpoint Source: GO_Central negative regulation of flower development Source: TAIR negative regulation of protein sumoylation Source: TAIR poly(A)+ mRNA export from nucleus Source: TAIR protein import into nucleus Source: InterPro regulation of gene silencing Source: TAIR stamen development	pep:novel chromosome:IWGSC1.0+popseq:6B:158336408:158348328:-1 gene:Traes_6BL_B599E4710 transcript:Traes_6BL_B599E4710.1	143 kDa	1	0	[]
Traes_6BS_0BDACE205.1	heme binding Source: InterPro metal ion binding Source: UniProtKB-KW peroxidase activity	hydrogen peroxide catabolic process Source: UniProtKB-KW lignin biosynthetic process Source: TAIR positive regulation of syringal lignin biosynthetic process Source: TAIR response to oxidative stress Source: InterPro xylem development	pep:novel scaffold:IWGSC1.0+popseq:IWGSC_CSS_6BS_scaff_2971039:4350:6012:1 gene:Traes_6BS_0BDACE205 transcript:Traes_6BS_0BDACE205.1	35 kDa	1	0	[]
Traes_6BS_21C42C224.1	?	?	pep:novel chromosome:IWGSC1.0+popseq:6B:979033:985525:-1 gene:Traes_6BS_21C42C224 transcript:Traes_6BS_21C42C224.1	97 kDa	1	0	[]
Traes_6BS_966E77D9A.2	ATP binding Source: UniProtKB-KW peptide receptor activity Source: TAIR protein serine/threonine kinase activity Source: TAIR transmembrane signaling receptor activity	pH reduction Source: TAIR unidimensional cell growth	pep:novel chromosome:IWGSC1.0+popseq:6B:130145073:130148387:-1 gene:Traes_6BS_966E77D9A transcript:Traes_6BS_966E77D9A.2	116 kDa	1	0	[]
Traes_6BS_B33520D64.1	ubiquitin protein ligase activity Source: GO_Central zinc ion binding	multicellular organism development Source: InterPro protein ubiquitination Source: UniProtKB regulation of autophagosome assembly Source: UniProtKB ubiquitin-dependent protein catabolic process	pep:novel scaffold:IWGSC1.0+popseq:IWGSC_CSS_6BS_scaff_3001527:4012:9567:-1 gene:Traes_6BS_B33520D64 transcript:Traes_6BS_B33520D64.1	35 kDa	1	0	[]
Traes_6DL_0190C4818.1	serine-type carboxypeptidase activity	proteolysis involved in cellular protein catabolic process	pep:novel chromosome:IWGSC1.0+popseq:6D:146701052:146703322:-1 gene:Traes_6DL_0190C4818 transcript:Traes_6DL_0190C4818.1 description:"serine carboxypeptidase-like 34"	39 kDa	1	0	[]
Traes_6DL_037954803.1	metal ion binding Source: UniProtKB-KW oxidoreductase activity, acting on single donors with incorporation of molecular oxygen, incorporation of two atoms of oxygen Source: InterPro		pep:novel scaffold:IWGSC1.0+popseq:IWGSC_CSS_6DL_scaff_286996:1:606:1 gene:Traes_6DL_037954803 transcript:Traes_6DL_037954803.1	21 kDa	1	0	[]
Traes_6DL_10926529D.1	clathrin binding Source: TAIR GTPase activity Source: TAIR GTP binding Source: UniProtKB-KW microtubule binding	clathrin-dependent endocytosis Source: TAIR mitochondrial fission Source: GO_Central regulation of establishment of cell polarity Source: TAIR response to abscisic acid Source: TAIR root hair initiation	pep:novel chromosome:IWGSC1.0+popseq:6D:146065744:146075215:1 gene:Traes_6DL_10926529D transcript:Traes_6DL_10926529D.1	80 kDa	1	0	[]
Traes_6DL_12B2487BC.2	ATP binding Source: InterPro hydrolase activity	protein metabolic process	pep:novel chromosome:IWGSC1.0+popseq:6D:40742913:40758460:1 gene:Traes_6DL_12B2487BC transcript:Traes_6DL_12B2487BC.2	102 kDa	1	0	[]
Traes_6DL_18CB2742C.1		cell redox homeostasis	pep:novel chromosome:IWGSC1.0+popseq:6D:174974573:174977042:1 gene:Traes_6DL_18CB2742C transcript:Traes_6DL_18CB2742C.1	27 kDa	1	0	[]
Traes_6DL_2012FD949.1	heme binding Source: InterPro metal ion binding Source: UniProtKB-KW peroxidase activity	hydrogen peroxide catabolic process Source: UniProtKB-KW lignin biosynthetic process Source: TAIR response to oxidative stress	pep:novel chromosome:IWGSC1.0+popseq:6D:149696427:149699519:1 gene:Traes_6DL_2012FD949 transcript:Traes_6DL_2012FD949.1	36 kDa	1	0	[]
Traes_6DL_2681D03BD.1	enzyme regulator activity	proteasome-mediated ubiquitin-dependent protein catabolic process Source: GO_Central protein catabolic process	pep:novel scaffold:IWGSC1.0+popseq:IWGSC_CSS_6DL_scaff_3248097:2335:6977:1 gene:Traes_6DL_2681D03BD transcript:Traes_6DL_2681D03BD.1	45 kDa	1	0	[]
Traes_6DL_275FA4D5F.1	acetylornithine deacetylase activity Source: UniProtKB-EC metal ion binding	arginine biosynthetic process	pep:novel chromosome:IWGSC1.0+popseq:6D:112920361:112924358:1 gene:Traes_6DL_275FA4D5F transcript:Traes_6DL_275FA4D5F.1 description:"Peptidase M20/M25/M40 family protein"	49 kDa	1	0	[]
Traes_6DL_283955EA6.2	GTPase activator activity Source: TAIR metal ion binding Source: UniProtKB-KW phospholipid binding	intracellular protein transport	pep:novel chromosome:IWGSC1.0+popseq:6D:83928389:83935152:1 gene:Traes_6DL_283955EA6 transcript:Traes_6DL_283955EA6.2	51 kDa	1	0	[]
Traes_6DL_325F9AE8C1.2	serine-type endopeptidase activity	leaf senescence Source: TAIR secondary shoot formation	pep:novel scaffold:IWGSC1.0+popseq:IWGSC_CSS_6DL_scaff_3288029:1:1086:-1 gene:Traes_6DL_325F9AE8C1 transcript:Traes_6DL_325F9AE8C1.2	37 kDa	1	0	[]
Traes_6DL_3945FC9B7.2	thioredoxin-disulfide reductase activity	removal of superoxide radicals	pep:novel chromosome:IWGSC1.0+popseq:6D:139084534:139088443:-1 gene:Traes_6DL_3945FC9B7 transcript:Traes_6DL_3945FC9B7.2	17 kDa	1	0	[]
Traes_6DL_765C26F04.1	endonuclease activity Source: GO_Central RNA binding	RNA modification	pep:novel scaffold:IWGSC1.0+popseq:IWGSC_CSS_6DL_scaff_1321099:1171:4937:-1 gene:Traes_6DL_765C26F04 transcript:Traes_6DL_765C26F04.1 description:"Tetratricopeptide repeat (TPR)-like superfamily protein"	88 kDa	1	0	[]
Traes_6DL_829AD2C16.2	thiol-dependent ubiquitin-specific protease activity	protein deubiquitination Source: GO_Central ubiquitin-dependent protein catabolic process	pep:novel chromosome:IWGSC1.0+popseq:6D:88208437:88213547:1 gene:Traes_6DL_829AD2C16 transcript:Traes_6DL_829AD2C16.2	31 kDa	1	0	[]
Traes_6DL_845E13FA0.1		circumnutation Source: TAIR response to salt stress Source: TAIR root development Source: TAIR vacuolar transport	pep:novel chromosome:IWGSC1.0+popseq:6D:118362557:118369975:-1 gene:Traes_6DL_845E13FA0 transcript:Traes_6DL_845E13FA0.1	196 kDa	1	0	[]
Traes_6DL_885B97D07.1	ATP binding Source: InterPro hydrolase activity		pep:novel chromosome:IWGSC1.0+popseq:6D:140429999:140441644:1 gene:Traes_6DL_885B97D07 transcript:Traes_6DL_885B97D07.1	110 kDa	1	0	[]
Traes_6DL_98DC00BA3.2	lipid binding Source: InterPro peptidase activity	lipid transport	pep:novel chromosome:IWGSC1.0+popseq:6D:140487004:140489484:-1 gene:Traes_6DL_98DC00BA3 transcript:Traes_6DL_98DC00BA3.2	17 kDa	1	0	[]
Traes_6DL_BBF78B02F.1	3-cyanoalanine hydratase activity Source: TAIR cyanoalanine nitrilase activity Source: TAIR indole-3-acetonitrile nitrilase activity Source: TAIR nitrilase activity Source: TAIR nitrile hydratase activity	cyanide metabolic process Source: TAIR detoxification of nitrogen compound	pep:novel chromosome:IWGSC1.0+popseq:6D:90997866:91002065:-1 gene:Traes_6DL_BBF78B02F transcript:Traes_6DL_BBF78B02F.1	38 kDa	1	0	[]
Traes_6DL_BDDF27A65.2	allene-oxide cyclase activity	jasmonic acid biosynthetic process	pep:novel scaffold:IWGSC1.0+popseq:IWGSC_CSS_6DL_scaff_3232197:4167:4999:-1 gene:Traes_6DL_BDDF27A65 transcript:Traes_6DL_BDDF27A65.2	26 kDa	1	0	[]
Traes_6DL_CFD8E7EFB.2		mitotic spindle assembly checkpoint Source: GO_Central negative regulation of flower development Source: TAIR negative regulation of protein sumoylation Source: TAIR poly(A)+ mRNA export from nucleus Source: TAIR protein import into nucleus Source: InterPro regulation of gene silencing Source: TAIR stamen development	pep:novel chromosome:IWGSC1.0+popseq:6D:148604510:148622523:-1 gene:Traes_6DL_CFD8E7EFB transcript:Traes_6DL_CFD8E7EFB.2	197 kDa	1	0	[]
Traes_6DL_D91E37517.1	2 iron, 2 sulfur cluster binding Source: UniProtKB-KW chlorophyllide a oxygenase [overall] activity Source: InterPro metal ion binding	protein targeting to chloroplast	pep:novel scaffold:IWGSC1.0+popseq:IWGSC_CSS_6DL_scaff_3246831:2:3371:1 gene:Traes_6DL_D91E37517 transcript:Traes_6DL_D91E37517.1 description:"translocon at the inner envelope membrane of chloroplasts 55-II"	53 kDa	1	0	[]
Traes_6DL_F48A5E31E.2	ATP binding Source: UniProtKB-KW protein serine/threonine kinase activity	intracellular signal transduction Source: GO_Central regulation of gene expression	pep:novel scaffold:IWGSC1.0+popseq:IWGSC_CSS_6DL_scaff_1888831:8041:13564:-1 gene:Traes_6DL_F48A5E31E transcript:Traes_6DL_F48A5E31E.2	52 kDa	1	0	[]
Traes_6DL_F4F20589A.1		plant-type cell wall organization Source: InterPro syncytium formation	pep:novel chromosome:IWGSC1.0+popseq:6D:146250817:146252835:-1 gene:Traes_6DL_F4F20589A transcript:Traes_6DL_F4F20589A.1	22 kDa	1	0	[]
Traes_6DL_FD8A6A45F.1	S-(hydroxymethyl)glutathione dehydrogenase activity Source: TAIR S-nitrosoglutathione reductase activity Source: TAIR zinc ion binding	cell death Source: TAIR ethanol oxidation Source: InterPro formaldehyde metabolic process Source: TAIR heat acclimation Source: TAIR seed development	pep:novel chromosome:IWGSC1.0+popseq:6D:171708546:171712658:1 gene:Traes_6DL_FD8A6A45F transcript:Traes_6DL_FD8A6A45F.1 description:"GroES-like zinc-binding dehydrogenase family protein"	41 kDa	1	0	[]
Traes_6DS_204661A07.1	sucrose alpha-glucosidase activity		pep:novel chromosome:IWGSC1.0+popseq:6D:4619330:4622257:-1 gene:Traes_6DS_204661A07 transcript:Traes_6DS_204661A07.1	73 kDa	1	0	[]
Traes_6DS_211935E65.2	cinnamyl-alcohol dehydrogenase activity Source: TAIR sinapyl alcohol dehydrogenase activity Source: UniProtKB-EC zinc ion binding	lignin biosynthetic process Source: TAIR response to karrikin	pep:novel chromosome:IWGSC1.0+popseq:6D:116349692:116354036:1 gene:Traes_6DS_211935E65 transcript:Traes_6DS_211935E65.2	39 kDa	1	0	[]
Traes_6DS_2532259B8.2	structural constituent of cytoskeleton	chromatin organization Source: TAIR covalent chromatin modification Source: UniProtKB-KW long-day photoperiodism, flowering Source: TAIR pollen sperm cell differentiation	pep:novel chromosome:IWGSC1.0+popseq:6D:100669672:100677585:-1 gene:Traes_6DS_2532259B8 transcript:Traes_6DS_2532259B8.2	53 kDa	1	0	[]
Traes_6DS_25C8DFAC0.1	RNA binding	DNA demethylation Source: TAIR gene silencing	pep:novel chromosome:IWGSC1.0+popseq:6D:17489329:17492123:-1 gene:Traes_6DS_25C8DFAC0 transcript:Traes_6DS_25C8DFAC0.1	55 kDa	1	0	[]
Traes_6DS_3522B8EF6.2	catalase activity Source: UniProtKB-EC heme binding Source: InterPro metal ion binding	hydrogen peroxide catabolic process Source: UniProtKB-KW response to oxidative stress	pep:novel chromosome:IWGSC1.0+popseq:6D:10497304:10499835:1 gene:Traes_6DS_3522B8EF6 transcript:Traes_6DS_3522B8EF6.2	58 kDa	1	0	[]
Traes_6DS_364056674.1	catalytic activity	metabolic process	pep:novel chromosome:IWGSC1.0+popseq:6D:60624180:60636873:1 gene:Traes_6DS_364056674 transcript:Traes_6DS_364056674.1	63 kDa	1	0	[]
Traes_6DS_3F20879F8.2	ATP binding Source: UniProtKB-KW transmembrane receptor protein serine/threonine kinase activity	cell surface receptor signaling pathway Source: GO_Central protein phosphorylation Source: GO_Central response to oxidative stress	pep:novel scaffold:IWGSC1.0+popseq:IWGSC_CSS_6DS_scaff_2107458:36:9410:-1 gene:Traes_6DS_3F20879F8 transcript:Traes_6DS_3F20879F8.2	69 kDa	1	0	[]
Traes_6DS_5DBF48560.1	L-lactate dehydrogenase activity	carbohydrate metabolic process Source: InterPro carboxylic acid metabolic process Source: InterPro response to abscisic acid Source: TAIR response to salt stress	Ortholog: Lactate/malate dehydrogenase family protein; FUNCTIONS IN: in 6 functions; INVOLVED IN: response to salt stress, response to abscisic acid stimulus	32 kDa	1	0	[]
Traes_6DS_8B33FC986.1	mRNA binding		pep:novel chromosome:IWGSC1.0+popseq:6D:130397391:130403491:1 gene:Traes_6DS_8B33FC986 transcript:Traes_6DS_8B33FC986.1	52 kDa	1	0	[]
Traes_6DS_AA77F7548.1	hydroquinone glucosyltransferase activity Source: UniProtKB-EC quercetin 3-O-glucosyltransferase activity Source: GO_Central quercetin 7-O-glucosyltransferase activity Source: GO_Central UDP-glucosyltransferase activity Source: TAIR UDP-glycosyltransferase activity	lignin biosynthetic process Source: TAIR response to salt stress Source: TAIR response to toxic substance Source: TAIR xenobiotic catabolic process Source: TAIR xenobiotic metabolic process	Ortholog: the glycosyltransferase (UGT72B1) is involved in metabolizing xenobiotica (chloroaniline and chlorophenole). Comparison between wild type and knock-out mutant demonstrates the central role of this gene for metabolizing chloroaniline but significantly less for chlorophenole	37 kDa	1	0	[]
Traes_6DS_CDCAD6797.1	aminopeptidase activity Source: TAIR metalloaminopeptidase activity Source: GO_Central N-1-naphthylphthalamic acid binding Source: UniProtKB peptide binding Source: GO_Central zinc ion binding	auxin polar transport Source: TAIR peptide catabolic process	Ortholog: encodes an aminopeptidase, a ortholog of mouse microsomal AP	98 kDa	1	0	[]
Traes_6DS_D8ED109D3.1	copper ion binding Source: TAIR dihydrolipoyllysine-residue acetyltransferase activity	glycolytic process	pep:novel scaffold:IWGSC1.0+popseq:IWGSC_CSS_6DS_scaff_2067626:472:6610:1 gene:Traes_6DS_D8ED109D3 transcript:Traes_6DS_D8ED109D3.1	57 kDa	1	0	[]
Traes_7AL_085BDBA1B.1 (+1)	ATP binding Source: UniProtKB-KW protein binding involved in protein folding Source: GO_Central unfolded protein binding	de novo' protein folding Source: GO_Central chaperone-mediated protein folding Source: GO_Central response to cadmium ion	pep:novel chromosome:IWGSC1.0+popseq:7A:146372913:146376265:1 gene:Traes_7AL_085BDBA1B transcript:Traes_7AL_085BDBA1B.1	30 kDa	1	0	[]
Traes_7AL_112C7294C.1	calcium ion binding	photosynthesis	pep:novel chromosome:IWGSC1.0+popseq:7A:167851205:167853619:1 gene:Traes_7AL_112C7294C transcript:Traes_7AL_112C7294C.1 description:"Mog1/PsbP/DUF1795-like photosystem II reaction center PsbP family protein"	34 kDa	1	0	[]
Traes_7AL_1744001DB.1 (+1)	mRNA 5'-UTR binding Source: GO_Central small ribosomal subunit rRNA binding Source: GO_Central structural constituent of ribosome	maturation of SSU-rRNA from tricistronic rRNA transcript (SSU-rRNA, 5.8S rRNA, LSU-rRNA) Source: GO_Central ribosomal small subunit assembly Source: GO_Central translation	pep:novel scaffold:IWGSC1.0+popseq:IWGSC_CSS_7AL_scaff_4533051:3220:5426:1 gene:Traes_7AL_1744001DB transcript:Traes_7AL_1744001DB.1	16 kDa	1	0	[]
Traes_7AL_18E841DD1.2	?	?	pep:novel scaffold:IWGSC1.0+popseq:IWGSC_CSS_7AL_scaff_4508157:820:6760:-1 gene:Traes_7AL_18E841DD1 transcript:Traes_7AL_18E841DD1.2	26 kDa	1	0	[]
Traes_7AL_284F107A0.3	dipeptidyl-peptidase activity Source: GO_Central serine-type peptidase activity	proteolysis	Ortholog: alpha/beta-Hydrolases superfamily protein; FUNCTIONS IN: serine-type peptidase activity, serine-type carboxypeptidase activity; INVOLVED IN: proteolysis;	34 kDa	1	0	[]
Traes_7AL_3C614133C.1	porphobilinogen synthase activity Source: GO_Central zinc ion binding	chlorophyll biosynthetic process Source: UniProtKB-UniPathway heme biosynthetic process Source: GO_Central porphyrin-containing compound biosynthetic process Source: TAIR protoporphyrinogen IX biosynthetic process	pep:novel chromosome:IWGSC1.0+popseq:7A:135234513:135237644:1 gene:Traes_7AL_3C614133C transcript:Traes_7AL_3C614133C.1	41 kDa	1	0	[]
Traes_7AL_80967149B.1	heme binding Source: InterPro metal ion binding Source: UniProtKB-KW peroxidase activity	hydrogen peroxide catabolic process Source: UniProtKB-KW response to oxidative stress Source: InterPro response to salt stress Source: TAIR response to zinc ion	pep:novel chromosome:IWGSC1.0+popseq:7A:141586248:141587444:1 gene:Traes_7AL_80967149B transcript:Traes_7AL_80967149B.1	23 kDa	1	0	[]
Traes_7AL_976D6E1B9.1	?	?	pep:novel chromosome:IWGSC1.0+popseq:7A:126029654:126031110:1 gene:Traes_7AL_976D6E1B9 transcript:Traes_7AL_976D6E1B9.1	25 kDa	1	0	[]
Traes_7AL_A9263A12A.1	GTPase activity Source: InterPro GTP binding	embryo development ending in seed dormancy Source: TAIR floral organ development Source: UniProtKB mRNA processing Source: UniProtKB-KW regulation of embryo sac egg cell differentiation Source: TAIR RNA splicing	pep:novel chromosome:IWGSC1.0+popseq:7A:116720575:116724176:1 gene:Traes_7AL_A9263A12A transcript:Traes_7AL_A9263A12A.1	83 kDa	1	0	[]
Traes_7AL_CBE99239D.2 (+2)	GTPase activity Source: InterPro GTP binding Source: UniProtKB-KW mRNA binding Source: TAIR structural constituent of cytoskeleton	microtubule-based process Source: InterPro response to cadmium ion	pep:novel chromosome:IWGSC1.0+popseq:7A:158177340:158180053:-1 gene:Traes_7AL_CBE99239D transcript:Traes_7AL_CBE99239D.2	35 kDa	1	0	[]
Traes_7AL_D67802F27.1	4-hydroxy-4-methyl-2-oxoglutarate aldolase activity Source: UniProtKB-EC metal ion binding Source: UniProtKB-KW oxaloacetate decarboxylase activity Source: UniProtKB-EC ribonuclease inhibitor activity	regulation of RNA metabolic process	pep:novel chromosome:IWGSC1.0+popseq:7A:179838133:179838627:1 gene:Traes_7AL_D67802F27 transcript:Traes_7AL_D67802F27.1	9 kDa	1	0	[]
Traes_7AL_DAC427546.1	ATP binding Source: UniProtKB-KW magnesium ion binding Source: InterPro phospholipid-translocating ATPase activity	Golgi vesicle budding	pep:novel chromosome:IWGSC1.0+popseq:7A:79266977:79272459:-1 gene:Traes_7AL_DAC427546 transcript:Traes_7AL_DAC427546.1	116 kDa	1	0	[]
Traes_7AS_2240F6F53.1	transmembrane transporter activity		pep:novel chromosome:IWGSC1.0+popseq:7A:6977389:6981553:-1 gene:Traes_7AS_2240F6F53 transcript:Traes_7AS_2240F6F53.1	40 kDa	1	0	[]
Traes_7AS_2E34BE24F.2	ATP binding Source: UniProtKB-KW calmodulin binding Source: UniProtKB carbohydrate binding Source: UniProtKB-KW protein kinase activity Source: TAIR protein serine/threonine kinase activity Source: UniProtKB ubiquitin protein ligase binding	protein autophosphorylation	pep:novel chromosome:IWGSC1.0+popseq:7A:65196191:65200536:-1 gene:Traes_7AS_2E34BE24F transcript:Traes_7AS_2E34BE24F.2	92 kDa	1	0	[]
Traes_7AS_305142CC5.1	heme binding Source: InterPro metal ion binding Source: UniProtKB-KW peroxidase activity	hydrogen peroxide catabolic process Source: UniProtKB-KW response to oxidative stress	pep:novel scaffold:IWGSC1.0+popseq:IWGSC_CSS_7AS_scaff_4053204:1:630:1 gene:Traes_7AS_305142CC5 transcript:Traes_7AS_305142CC5.1	9 kDa	1	0	[]
Traes_7AS_32A4F04AA.2	?	?	pep:novel chromosome:IWGSC1.0+popseq:7A:73837193:73840470:1 gene:Traes_7AS_32A4F04AA transcript:Traes_7AS_32A4F04AA.2	43 kDa	1	0	[]
Traes_7AS_368D71F99.1	kinase activity		pep:novel chromosome:IWGSC1.0+popseq:7A:52761340:52767397:-1 gene:Traes_7AS_368D71F99 transcript:Traes_7AS_368D71F99.1	41 kDa	1	0	[]
Traes_7AS_5A2B92F17.1	ATP binding	positive regulation of translation Source: TAIR protein metabolic process Source: InterPro protein unfolding Source: TAIR response to heat Source: TAIR response to high light intensity Source: TAIR response to hydrogen peroxide	pep:novel chromosome:IWGSC1.0+popseq:7A:3564281:3565189:-1 gene:Traes_7AS_5A2B92F17 transcript:Traes_7AS_5A2B92F17.1	18 kDa	1	0	[]
Traes_7AS_77739FA2C.2	snRNA stem-loop binding	mRNA splicing, via spliceosome	pep:novel chromosome:IWGSC1.0+popseq:7A:103544445:103545969:-1 gene:Traes_7AS_77739FA2C transcript:Traes_7AS_77739FA2C.2	27 kDa	1	0	[]
Traes_7AS_AD936D17A.1	fatty-acyl-CoA binding Source: TAIR phosphatidylcholine binding	lipid transport Source: TAIR response to absence of light Source: UniProtKB response to cold Source: TAIR response to freezing Source: TAIR response to hypoxia	pep:novel chromosome:IWGSC1.0+popseq:7A:6743312:6745589:-1 gene:Traes_7AS_AD936D17A transcript:Traes_7AS_AD936D17A.1	20 kDa	1	0	[]
Traes_7AS_BDE4D9057.2 (+1)		autophagosome assembly	pep:novel chromosome:IWGSC1.0+popseq:7A:1431894:1441529:-1 gene:Traes_7AS_BDE4D9057 transcript:Traes_7AS_BDE4D9057.2	162 kDa	1	0	[]
Traes_7AS_D51B7852F.1	identical protein binding	peroxisome fission Source: UniProtKB peroxisome organization Source: TAIR regulation of peroxisome size	pep:novel chromosome:IWGSC1.0+popseq:7A:4610734:4613421:-1 gene:Traes_7AS_D51B7852F transcript:Traes_7AS_D51B7852F.1	26 kDa	1	0	[]
Traes_7AS_DB2B4E3DE.1 (+1)	transferase activity, transferring acyl groups other than amino-acyl groups	chloroplast fission Source: TAIR embryo development ending in seed dormancy Source: TAIR fatty acid biosynthetic process Source: InterPro response to cytokinin	pep:novel chromosome:IWGSC1.0+popseq:7A:38301605:38304533:-1 gene:Traes_7AS_DB2B4E3DE transcript:Traes_7AS_DB2B4E3DE.1	32 kDa	1	0	[]
Traes_7AS_E28C6595A.2	?	?	pep:novel chromosome:IWGSC1.0+popseq:7A:100476286:100481673:1 gene:Traes_7AS_E28C6595A transcript:Traes_7AS_E28C6595A.2	45 kDa	1	0	[]
Traes_7BL_22D90B6C6.1	ADP binding Source: InterPro ATP binding	defense response Source: GO_Central signal transduction	pep:novel chromosome:IWGSC1.0+popseq:7B:224240008:224244407:1 gene:Traes_7BL_22D90B6C6 transcript:Traes_7BL_22D90B6C6.1	77 kDa	1	0	[]
Traes_7BL_3B48B4FF3.1	acyl-CoA dehydrogenase activity Source: GO_Central acyl-CoA oxidase activity Source: TAIR FAD binding Source: InterPro flavin adenine dinucleotide binding	fatty acid beta-oxidation Source: TAIR fatty acid beta-oxidation using acyl-CoA dehydrogenase Source: GO_Central fatty acid beta-oxidation using acyl-CoA oxidase Source: UniProtKB-UniPathway medium-chain fatty acid metabolic process	pep:novel scaffold:IWGSC1.0+popseq:IWGSC_CSS_7BL_scaff_6500116:4:1576:1 gene:Traes_7BL_3B48B4FF3 transcript:Traes_7BL_3B48B4FF3.1	25 kDa	1	0	[]
Traes_7BL_52E357700.2	?	?	pep:novel chromosome:IWGSC1.0+popseq:7B:65622790:65625577:-1 gene:Traes_7BL_52E357700 transcript:Traes_7BL_52E357700.2	77 kDa	1	0	[]
Traes_7BL_7911CBB02.2 (+1)	translation initiation factor activity		pep:novel scaffold:IWGSC1.0+popseq:IWGSC_CSS_7BL_scaff_6674489:4490:5859:-1 gene:Traes_7BL_7911CBB02 transcript:Traes_7BL_7911CBB02.2	13 kDa	1	0	[]
Traes_7BL_B00181304.1	copper ion binding Source: TAIR glutathione transferase activity Source: GO_Central translation elongation factor activity	glutathione metabolic process Source: GO_Central response to cadmium ion Source: TAIR response to zinc ion	pep:novel chromosome:IWGSC1.0+popseq:7B:168323189:168324619:-1 gene:Traes_7BL_B00181304 transcript:Traes_7BL_B00181304.1	29 kDa	1	0	[]
Traes_7BL_F5BD2E464.1	isomerase activity	response to absence of light Source: TAIR response to carbon starvation	pep:novel chromosome:IWGSC1.0+popseq:7B:190123939:190128422:-1 gene:Traes_7BL_F5BD2E464 transcript:Traes_7BL_F5BD2E464.1	59 kDa	1	0	[]
Traes_7BS_1A6D16C6B.1	ATP binding Source: UniProtKB-KW unfolded protein binding	cellular response to calcium ion Source: TAIR chaperone-mediated protein complex assembly Source: TAIR innate immune response Source: UniProtKB-KW protein folding Source: InterPro response to heat	pep:novel chromosome:IWGSC1.0+popseq:7B:62641694:62645451:1 gene:Traes_7BS_1A6D16C6B transcript:Traes_7BS_1A6D16C6B.1	80 kDa	1	0	[]
Traes_7BS_1F4C5C328.1	DNA binding Source: UniProtKB-KW mRNA binding	cotyledon vascular tissue pattern formation Source: TAIR endonucleolytic cleavage involved in rRNA processing Source: TAIR leaf development Source: TAIR leaf vascular tissue pattern formation Source: TAIR petal vascular tissue pattern formation Source: TAIR ribosome biogenesis Source: TAIR root development Source: TAIR rRNA processing Source: TAIR sepal vascular tissue pattern formation Source: T…	Ortholog: Encodes ATNUC-L1 (NUCLEOLIN LIKE 1), the predominant form of the two nucleolin proteins found in Arabidopsis. This protein is involved in rRNA processing, ribosome biosynthesis, and vascular pattern formation	52 kDa	1	0	[]
Traes_7BS_2BE9F1037.1	ATP binding Source: UniProtKB-KW protein binding involved in protein folding Source: GO_Central unfolded protein binding	de novo' protein folding Source: GO_Central chaperone-mediated protein folding	pep:novel chromosome:IWGSC1.0+popseq:7B:77652095:77658940:-1 gene:Traes_7BS_2BE9F1037 transcript:Traes_7BS_2BE9F1037.1 description:"T-complex protein 1 alpha subunit"	59 kDa	1	0	[]
Traes_7BS_7002D209B.1	?	?	pep:novel chromosome:IWGSC1.0+popseq:7B:61508751:61513647:1 gene:Traes_7BS_7002D209B transcript:Traes_7BS_7002D209B.1	44 kDa	1	0	[]
Traes_7BS_A9827E366.1	calcium ion binding Source: UniProtKB magnesium ion binding Source: UniProtKB phosphoserine phosphatase activity	embryo development ending in seed dormancy Source: TAIR L-serine biosynthetic process Source: TAIR L-serine metabolic process Source: UniProtKB pollen development Source: TAIR root development	pep:novel chromosome:IWGSC1.0+popseq:7B:5701502:5705319:-1 gene:Traes_7BS_A9827E366 transcript:Traes_7BS_A9827E366.1	26 kDa	1	0	[]
Traes_7BS_D75B13E9B.2	serine-type carboxypeptidase activity	proteolysis involved in cellular protein catabolic process	pep:novel chromosome:IWGSC1.0+popseq:7B:27330491:27335453:-1 gene:Traes_7BS_D75B13E9B transcript:Traes_7BS_D75B13E9B.2 description:"serine carboxypeptidase-like 29"	40 kDa	1	0	[]
Traes_7BS_EF4095248.1 (+1)	mRNA binding		pep:novel chromosome:IWGSC1.0+popseq:7B:103437566:103441314:1 gene:Traes_7BS_EF4095248 transcript:Traes_7BS_EF4095248.1	48 kDa	1	0	[]
Traes_7DL_0C02D38AD.1	cinnamyl-alcohol dehydrogenase activity Source: UniProtKB-EC sinapyl alcohol dehydrogenase activity Source: UniProtKB-EC zinc ion binding	lignin biosynthetic process	pep:novel chromosome:IWGSC1.0+popseq:7D:120392235:120396967:-1 gene:Traes_7DL_0C02D38AD transcript:Traes_7DL_0C02D38AD.1	40 kDa	1	0	[]
Traes_7DL_1D591BE1B.1	?	?	pep:novel chromosome:IWGSC1.0+popseq:7D:202778626:202783080:1 gene:Traes_7DL_1D591BE1B transcript:Traes_7DL_1D591BE1B.1	63 kDa	1	0	[]
Traes_7DL_574A91F0E.1	heme binding Source: TAIR heme oxygenase (decyclizing) activity Source: TAIR metal ion binding	carotenoid biosynthetic process Source: TAIR cellular response to UV-C Source: TAIR chloroplast-nucleus signaling pathway Source: TAIR flavonoid biosynthetic process Source: TAIR heme oxidation Source: InterPro photosynthesis Source: UniProtKB-KW phytochromobilin biosynthetic process Source: TAIR regulation of meristem growth Source: TAIR regulation of stomatal movement	pep:novel chromosome:IWGSC1.0+popseq:7D:172296383:172299314:-1 gene:Traes_7DL_574A91F0E transcript:Traes_7DL_574A91F0E.1	23 kDa	1	0	[]
Traes_7DL_5B4982EE3.1 (+1)	electron transfer activity Source: InterPro metal ion binding		pep:novel chromosome:IWGSC1.0+popseq:7D:82468503:82469166:1 gene:Traes_7DL_5B4982EE3 transcript:Traes_7DL_5B4982EE3.1	14 kDa	1	0	[]
Traes_7DL_5CA753DBF.2	transferase activity, transferring glycosyl groups	plant-type cell wall organization Source: TAIR protein N-linked glycosylation via asparagine Source: TAIR unidimensional cell growth	pep:novel chromosome:IWGSC1.0+popseq:7D:192052407:192054221:1 gene:Traes_7DL_5CA753DBF transcript:Traes_7DL_5CA753DBF.2 description:"dolichyl-diphosphooligosaccharide-protein glycosyltransferase 48kDa subunit family protein"	48 kDa	1	0	[]
Traes_7DL_61B099A91.1	12-oxophytodienoate reductase activity Source: TAIR FMN binding	jasmonic acid biosynthetic process Source: TAIR oxylipin biosynthetic process Source: UniProtKB-UniPathway response to fungus Source: TAIR response to ozone Source: TAIR stamen development	pep:novel chromosome:IWGSC1.0+popseq:7D:193448272:193450007:1 gene:Traes_7DL_61B099A91 transcript:Traes_7DL_61B099A91.1 description:"oxophytodienoate-reductase 3"	37 kDa	1	0	[]
Traes_7DL_6DF800365.1	alcohol-forming fatty acyl-CoA reductase activity Source: UniProtKB-EC fatty-acyl-CoA reductase (alcohol-forming) activity Source: TAIR long-chain-fatty-acyl-CoA reductase activity	lipid metabolic process Source: UniProtKB-KW long-chain fatty-acyl-CoA metabolic process Source: GO_Central response to salt stress Source: TAIR response to wounding Source: TAIR suberin biosynthetic process	pep:novel chromosome:IWGSC1.0+popseq:7D:131440008:131443619:1 gene:Traes_7DL_6DF800365 transcript:Traes_7DL_6DF800365.1	57 kDa	1	0	[]
Traes_7DL_742035D51.1		mitochondrial electron transport, NADH to ubiquinone	pep:novel chromosome:IWGSC1.0+popseq:7D:138384008:138388003:-1 gene:Traes_7DL_742035D51 transcript:Traes_7DL_742035D51.1 description:"NADH-ubiquinone oxidoreductase-related"	12 kDa	1	0	[]
Traes_7DL_85A6FC0F2.1		chlororespiration	pep:novel chromosome:IWGSC1.0+popseq:7D:113436165:113437796:1 gene:Traes_7DL_85A6FC0F2 transcript:Traes_7DL_85A6FC0F2.1 description:"post-illumination chlorophyll fluorescence increase"	25 kDa	1	0	[]
Traes_7DL_85E01EB46.2	4-hydroxy-4-methyl-2-oxoglutarate aldolase activity Source: UniProtKB-EC metal ion binding Source: UniProtKB-KW oxaloacetate decarboxylase activity Source: UniProtKB-EC ribonuclease inhibitor activity	regulation of RNA metabolic process	pep:novel chromosome:IWGSC1.0+popseq:7D:232108322:232109712:-1 gene:Traes_7DL_85E01EB46 transcript:Traes_7DL_85E01EB46.2	26 kDa	1	0	[]
Traes_7DL_99BD3E65A.2	mRNA binding Source: TAIR structural constituent of ribosome	maturation of SSU-rRNA from tricistronic rRNA transcript (SSU-rRNA, 5.8S rRNA, LSU-rRNA) Source: GO_Central translation	pep:novel chromosome:IWGSC1.0+popseq:7D:76732866:76734734:-1 gene:Traes_7DL_99BD3E65A transcript:Traes_7DL_99BD3E65A.2	16 kDa	1	0	[]
Traes_7DL_B6A422045.1	ATP binding Source: UniProtKB-KW phosphoglycerate kinase activity Source: TAIR protein kinase activity	glycolytic process Source: TAIR response to glucose Source: UniProtKB response to heat Source: UniProtKB response to light stimulus Source: UniProtKB response to molecule of bacterial origin	pep:novel chromosome:IWGSC1.0+popseq:7D:216332457:216334064:1 gene:Traes_7DL_B6A422045 transcript:Traes_7DL_B6A422045.1	23 kDa	1	0	[]
Traes_7DL_B9EF4FCAD.1	cobalt ion binding Source: TAIR oxidoreductase activity Source: InterPro zinc ion binding	response to organic substance	pep:novel scaffold:IWGSC1.0+popseq:IWGSC_CSS_7DL_scaff_3394042:2153:4981:1 gene:Traes_7DL_B9EF4FCAD transcript:Traes_7DL_B9EF4FCAD.1 description:"GroES-like zinc-binding alcohol dehydrogenase family protein"	44 kDa	1	0	[]
Traes_7DL_BD3BB9CB3.1	aspartic-type endopeptidase activity	protein catabolic process Source: GO_Central proteolysis	pep:novel chromosome:IWGSC1.0+popseq:7D:219461974:219463963:1 gene:Traes_7DL_BD3BB9CB3 transcript:Traes_7DL_BD3BB9CB3.1	53 kDa	1	0	[]
Traes_7DL_CE37E2AF1.1	heme binding Source: InterPro metal ion binding Source: UniProtKB-KW peroxidase activity	hydrogen peroxide catabolic process Source: InterPro plant-type cell wall organization Source: GO_Central response to oxidative stress	Ortholog: Peroxidase superfamily protein; FUNCTIONS IN: peroxidase activity, heme binding; INVOLVED IN: response to oxidative stress, oxidation reduction	34 kDa	1	0	[]
Traes_7DL_D5FCF9F33.2	?	?	pep:novel scaffold:IWGSC1.0+popseq:IWGSC_CSS_7DL_scaff_3365827:236:14027:1 gene:Traes_7DL_D5FCF9F33 transcript:Traes_7DL_D5FCF9F33.2	168 kDa	1	0	[]
Traes_7DL_DB32ADFAE.1	calcium ion binding Source: InterPro oxidoreductase activity	oxidation-reduction process	pep:novel chromosome:IWGSC1.0+popseq:7D:156805969:156813144:1 gene:Traes_7DL_DB32ADFAE transcript:Traes_7DL_DB32ADFAE.1	65 kDa	1	0	[]
Traes_7DL_E48FCCB32.1	catalytic activity Source: InterPro coenzyme binding	response to abscisic acid Source: TAIR response to cadmium ion Source: TAIR response to heat Source: TAIR response to water deprivation	pep:novel scaffold:IWGSC1.0+popseq:IWGSC_CSS_7DL_scaff_3372000:1081:4516:1 gene:Traes_7DL_E48FCCB32 transcript:Traes_7DL_E48FCCB32.1	35 kDa	1	0	[]
Traes_7DL_F1ABAE725.1	?	?	pep:novel chromosome:IWGSC1.0+popseq:7D:147542425:147543745:1 gene:Traes_7DL_F1ABAE725 transcript:Traes_7DL_F1ABAE725.1	17 kDa	1	0	[]
Traes_7DL_FCCDB9A46.1	sedoheptulose-7-phosphate:D-glyceraldehyde-3-phosphate glyceronetransferase activity Source: InterPro zinc ion binding	carbohydrate metabolic process Source: InterPro pentose-phosphate shunt	pep:novel chromosome:IWGSC1.0+popseq:7D:74398854:74404212:-1 gene:Traes_7DL_FCCDB9A46 transcript:Traes_7DL_FCCDB9A46.1 description:"Aldolase superfamily protein"	43 kDa	1	0	[]
Traes_7DL_FD9C633D7.2	?	?	pep:novel chromosome:IWGSC1.0+popseq:7D:90208910:90213003:1 gene:Traes_7DL_FD9C633D7 transcript:Traes_7DL_FD9C633D7.2	97 kDa	1	0	[]
Traes_7DS_1CD8342FF.1	acyl-CoA dehydrogenase activity Source: GO_Central acyl-CoA oxidase activity Source: TAIR FAD binding Source: InterPro flavin adenine dinucleotide binding	fatty acid beta-oxidation Source: TAIR fatty acid beta-oxidation using acyl-CoA dehydrogenase Source: GO_Central jasmonic acid biosynthetic process Source: TAIR long-chain fatty acid metabolic process Source: TAIR response to cadmium ion Source: TAIR response to fungus Source: TAIR response to wounding	pep:novel chromosome:IWGSC1.0+popseq:7D:930960:936354:1 gene:Traes_7DS_1CD8342FF transcript:Traes_7DS_1CD8342FF.1	70 kDa	1	0	[]
Traes_7DS_507FCDE0F.1	caffeoyl-CoA O-methyltransferase activity Source: TAIR metal ion binding	coumarin biosynthetic process Source: TAIR lignin biosynthetic process Source: UniProtKB-KW response to cadmium ion	pep:novel chromosome:IWGSC1.0+popseq:7D:158386881:158387764:1 gene:Traes_7DS_507FCDE0F transcript:Traes_7DS_507FCDE0F.1	15 kDa	1	0	[]
Traes_7DS_5BC7069B8.2	flavin adenine dinucleotide binding Source: InterPro monodehydroascorbate reductase (NADH) activity	response to cadmium ion Source: TAIR response to salt stress Source: TAIR response to zinc ion	pep:novel chromosome:IWGSC1.0+popseq:7D:99970970:99973657:1 gene:Traes_7DS_5BC7069B8 transcript:Traes_7DS_5BC7069B8.2	48 kDa	1	0	[]
Traes_7DS_831EAF074.2	metal ion binding		pep:novel scaffold:IWGSC1.0+popseq:IWGSC_CSS_7DS_scaff_3875815:2:11312:1 gene:Traes_7DS_831EAF074 transcript:Traes_7DS_831EAF074.2	142 kDa	1	0	[]
Traes_7DS_91647DECC.1	glutathione transferase activity	de-etiolation Source: TAIR glutathione metabolic process Source: TAIR lateral root development Source: TAIR negative regulation of response to water deprivation Source: TAIR regulation of growth Source: UniProtKB-KW response to growth hormone Source: TAIR response to karrikin Source: TAIR response to salt stress Source: TAIR toxin catabolic process	pep:novel chromosome:IWGSC1.0+popseq:7D:4722837:4723657:-1 gene:Traes_7DS_91647DECC transcript:Traes_7DS_91647DECC.1	16 kDa	1	0	[]
Traes_7DS_967C54D2A.1		negative regulation of cytokinin-activated signaling pathway Source: TAIR positive regulation of gene expression Source: TAIR regulation of auxin polar transport Source: TAIR root meristem growth	pep:novel chromosome:IWGSC1.0+popseq:7D:136091096:136096622:-1 gene:Traes_7DS_967C54D2A transcript:Traes_7DS_967C54D2A.1 description:"HSP20-like chaperones superfamily protein"	24 kDa	1	0	[]
Traes_7DS_B656C30EB1.1	threonine-type endopeptidase activity	response to cadmium ion Source: TAIR ubiquitin-dependent protein catabolic process	pep:novel scaffold:IWGSC1.0+popseq:IWGSC_CSS_7DS_scaff_1245032:1:305:-1 gene:Traes_7DS_B656C30EB1 transcript:Traes_7DS_B656C30EB1.1	10 kDa	1	0	[]
Traes_7DS_C2FAEB062.2		protein transport	pep:novel chromosome:IWGSC1.0+popseq:7D:99095816:99099366:-1 gene:Traes_7DS_C2FAEB062 transcript:Traes_7DS_C2FAEB062.2	46 kDa	1	0	[]
Traes_7DS_D4801B9DC.1		response to brassinosteroid	pep:novel scaffold:IWGSC1.0+popseq:IWGSC_CSS_7DS_scaff_2301298:5:239:1 gene:Traes_7DS_D4801B9DC transcript:Traes_7DS_D4801B9DC.1	8 kDa	1	0	[]
Traes_7DS_D9A6063F0.1	pinoresinol reductase activity		pep:novel chromosome:IWGSC1.0+popseq:7D:102223970:102226298:1 gene:Traes_7DS_D9A6063F0 transcript:Traes_7DS_D9A6063F0.1	27 kDa	1	0	[]
Traes_7DS_DA68E00EB.2	electron transfer activity	cellular response to light intensity Source: TAIR photoprotection Source: TAIR photosynthetic electron transport in photosystem I Source: TAIR response to high light intensity Source: TAIR response to water deprivation	pep:novel chromosome:IWGSC1.0+popseq:7D:100012940:100013565:1 gene:Traes_7DS_DA68E00EB transcript:Traes_7DS_DA68E00EB.2 description:"proton gradient regulation 5"	13 kDa	1	0	[]
Traes_7DS_E218FDAF2.1	catalytic activity		pep:novel chromosome:IWGSC1.0+popseq:7D:102227861:102233848:1 gene:Traes_7DS_E218FDAF2 transcript:Traes_7DS_E218FDAF2.1 description:"CONTAINS InterPro DOMAIN/s\x3a Uncharacterised conserved protein UCP033271 (InterPro\x3aIPR008322), TIM-barrel signal transduction protein, predicted (InterPro\x3aIPR009215)\x3b Has 30201 Blast hits to 17322 proteins in 780 species\x3a Archae - 12\x3b Bacteria - 139…	80 kDa	1	0	[]
Traes_7DS_E327BB7E9.1	hydrolase activity, acting on ester bonds	biosynthetic process	pep:novel chromosome:IWGSC1.0+popseq:7D:14512404:14514746:-1 gene:Traes_7DS_E327BB7E9 transcript:Traes_7DS_E327BB7E9.1	40 kDa	1	0	[]
Traes_7DS_EDB5F38F3.1	lipase activity Source: TAIR metal ion binding Source: UniProtKB-KW plant seed peroxidase activity		pep:novel chromosome:IWGSC1.0+popseq:7D:117375265:117377688:-1 gene:Traes_7DS_EDB5F38F3 transcript:Traes_7DS_EDB5F38F3.1	26 kDa	1	0	[]
TRAES3BF002700080CFD_t1	?	?	pep:novel chromosome:IWGSC1.0+popseq:3B:193742917:193743315:1 gene:TRAES3BF002700080CFD_g transcript:TRAES3BF002700080CFD_t1	15 kDa	1	0	[]
TRAES3BF007900040CFD_t1 (+2)		regulation of photomorphogenesis	pep:novel chromosome:IWGSC1.0+popseq:3B:473117308:473122180:-1 gene:TRAES3BF007900040CFD_g transcript:TRAES3BF007900040CFD_t1	83 kDa	1	0	[]
TRAES3BF013300030CFD_t1	2,3-bisphosphoglycerate-independent phosphoglycerate mutase activity Source: TAIR manganese ion binding	glucose catabolic process Source: InterPro glycolytic process Source: UniProtKB-UniPathway pollen development Source: TAIR response to cadmium ion Source: TAIR stomatal movement	pep:novel chromosome:IWGSC1.0+popseq:3B:575859914:575863581:1 gene:TRAES3BF013300030CFD_g transcript:TRAES3BF013300030CFD_t1	61 kDa	1	0	[]
TRAES3BF026000070CFD_t1	ATP binding Source: InterPro protein serine/threonine kinase activity		pep:novel chromosome:IWGSC1.0+popseq:3B:761737123:761752219:-1 gene:TRAES3BF026000070CFD_g transcript:TRAES3BF026000070CFD_t1	287 kDa	1	0	[]
TRAES3BF026500030CFD_t1	ATPase activity, coupled to transmembrane movement of substances Source: InterPro ATP binding		pep:novel chromosome:IWGSC1.0+popseq:3B:467440655:467459418:-1 gene:TRAES3BF026500030CFD_g transcript:TRAES3BF026500030CFD_t1	224 kDa	1	0	[]
TRAES3BF038100020CFD_t1 (+1)	DNA binding	protein import into chloroplast stroma	pep:novel chromosome:IWGSC1.0+popseq:3B:436960701:436965680:-1 gene:TRAES3BF038100020CFD_g transcript:TRAES3BF038100020CFD_t1	20 kDa	1	0	[]
TRAES3BF045900050CFD_t1	arginine decarboxylase activity Source: UniProtKB-EC protein homodimerization activity	arginine catabolic process Source: InterPro polyamine biosynthetic process Source: TAIR putrescine biosynthetic process Source: UniProtKB-KW response to cold Source: TAIR response to oxidative stress Source: TAIR response to salt stress Source: TAIR spermidine biosynthetic process	pep:novel chromosome:IWGSC1.0+popseq:3B:52278764:52280749:-1 gene:TRAES3BF045900050CFD_g transcript:TRAES3BF045900050CFD_t1	73 kDa	1	0	[]
TRAES3BF046100030CFD_t1	mRNA binding		pep:novel chromosome:IWGSC1.0+popseq:3B:508483366:508484777:-1 gene:TRAES3BF046100030CFD_g transcript:TRAES3BF046100030CFD_t1	15 kDa	1	0	[]
TRAES3BF047500040CFD_t1	carboxylic ester hydrolase activity Source: UniProtKB-KW S-formylglutathione hydrolase activity	formaldehyde catabolic process Source: InterPro response to cadmium ion	pep:novel chromosome:IWGSC1.0+popseq:3B:727383897:727388617:-1 gene:TRAES3BF047500040CFD_g transcript:TRAES3BF047500040CFD_t1 description:"S-formylglutathione hydrolase"	32 kDa	1	0	[]
TRAES3BF050100010CFD_t1	ATP binding	positive regulation of translation Source: TAIR protein metabolic process Source: InterPro protein unfolding Source: TAIR response to heat Source: TAIR response to high light intensity Source: TAIR response to hydrogen peroxide	pep:novel chromosome:IWGSC1.0+popseq:3B:391944197:391947570:1 gene:TRAES3BF050100010CFD_g transcript:TRAES3BF050100010CFD_t1	101 kDa	1	0	[]
TRAES3BF053100120CFD_t1	NAD binding Source: InterPro oxidoreductase activity, acting on NAD(P)H Source: InterPro quinone binding		pep:novel chromosome:IWGSC1.0+popseq:3B:9458643:9464648:-1 gene:TRAES3BF053100120CFD_g transcript:TRAES3BF053100120CFD_t1	45 kDa	1	0	[]
TRAES3BF054800050CFD_t1 (+2)		photosystem II oxygen evolving complex assembly	pep:novel chromosome:IWGSC1.0+popseq:3B:126307496:126312814:1 gene:TRAES3BF054800050CFD_g transcript:TRAES3BF054800050CFD_t1 description:"tetratricopeptide repeat (TPR)-containing protein"	49 kDa	1	0	[]
TRAES3BF058300010CFD_t1	structural molecule activity	ER to Golgi vesicle-mediated transport Source: GO_Central intracellular protein transport Source: InterPro intra-Golgi vesicle-mediated transport Source: GO_Central retrograde vesicle-mediated transport, Golgi to ER	pep:novel chromosome:IWGSC1.0+popseq:3B:281501814:281506179:-1 gene:TRAES3BF058300010CFD_g transcript:TRAES3BF058300010CFD_t1	105 kDa	1	0	[]
TRAES3BF058900050CFD_t1	?	?	pep:novel chromosome:IWGSC1.0+popseq:3B:430137706:430154071:-1 gene:TRAES3BF058900050CFD_g transcript:TRAES3BF058900050CFD_t1 description:"Transducin/WD40 repeat-like superfamily protein"	145 kDa	1	0	[]
TRAES3BF060600140CFD_t1 (+2)	acetyl-CoA C-acetyltransferase activity Source: TAIR metal ion binding	fatty acid beta-oxidation	pep:novel chromosome:IWGSC1.0+popseq:3B:1460015:1463330:-1 gene:TRAES3BF060600140CFD_g transcript:TRAES3BF060600140CFD_t1	43 kDa	1	0	[]
TRAES3BF066200040CFD_t1	mRNA binding		pep:novel chromosome:IWGSC1.0+popseq:3B:143381142:143382963:-1 gene:TRAES3BF066200040CFD_g transcript:TRAES3BF066200040CFD_t1	16 kDa	1	0	[]
TRAES3BF066400020CFD_t1	aldehyde dehydrogenase (NAD) activity Source: TAIR coniferyl-aldehyde dehydrogenase activity	phenylpropanoid biosynthetic process	pep:novel chromosome:IWGSC1.0+popseq:3B:666443684:666448017:-1 gene:TRAES3BF066400020CFD_g transcript:TRAES3BF066400020CFD_t1	54 kDa	1	0	[]
TRAES3BF067200020CFD_t1 (+2)	ATPase coupled ion transmembrane transporter activity Source: GO_Central proton-transporting ATPase activity, rotational mechanism	ATP hydrolysis coupled proton transport	pep:novel chromosome:IWGSC1.0+popseq:3B:300196329:300198676:-1 gene:TRAES3BF067200020CFD_g transcript:TRAES3BF067200020CFD_t1 description:"vacuolar ATPase subunit F family protein"	14 kDa	1	0	[]
TRAES3BF068700080CFD_t1	IAA-Ala conjugate hydrolase activity Source: TAIR metal ion binding	metabolic process Source: InterPro response to wounding	pep:novel chromosome:IWGSC1.0+popseq:3B:356988141:356993456:1 gene:TRAES3BF068700080CFD_g transcript:TRAES3BF068700080CFD_t1	47 kDa	1	0	[]
TRAES3BF069100090CFD_t1	copper ion binding Source: InterPro oxidoreductase activity, oxidizing metal ions	cellular response to phosphate starvation Source: TAIR meristem maintenance	pep:novel chromosome:IWGSC1.0+popseq:3B:609369557:609373015:-1 gene:TRAES3BF069100090CFD_g transcript:TRAES3BF069100090CFD_t1	66 kDa	1	0	[]
TRAES3BF070800020CFD_t1	?	?	Ortholog: Kinase-related protein of unknown function (DUF1296)	90 kDa	1	0	[]
TRAES3BF074200070CFD_t1	DNA binding Source: UniProtKB-KW mRNA binding	regulation of transcription, DNA-templated Source: UniProtKB-KW response to cadmium ion Source: TAIR transcription, DNA-templated	pep:novel chromosome:IWGSC1.0+popseq:3B:230869869:230873611:1 gene:TRAES3BF074200070CFD_g transcript:TRAES3BF074200070CFD_t1 description:"purin-rich alpha 1"	33 kDa	1	0	[]
TRAES3BF079100040CFD_t1	hydrolase activity	phylloquinone biosynthetic process Source: TAIR protein homotetramerization	pep:novel chromosome:IWGSC1.0+popseq:3B:63174659:63175259:1 gene:TRAES3BF079100040CFD_g transcript:TRAES3BF079100040CFD_t1	18 kDa	1	0	[]
TRAES3BF083000240CFD_t1	ATP binding Source: UniProtKB-KW protein serine/threonine kinase activity		pep:novel chromosome:IWGSC1.0+popseq:3B:61844858:61847624:-1 gene:TRAES3BF083000240CFD_g transcript:TRAES3BF083000240CFD_t1	97 kDa	1	0	[]
TRAES3BF084300020CFD_t1	ATP binding Source: UniProtKB-KW diphosphomevalonate decarboxylase activity	isopentenyl diphosphate biosynthetic process, mevalonate pathway Source: GO_Central sterol biosynthetic process	pep:novel chromosome:IWGSC1.0+popseq:3B:762848379:762852540:1 gene:TRAES3BF084300020CFD_g transcript:TRAES3BF084300020CFD_t1	46 kDa	1	0	[]
TRAES3BF091400230CFD_t1	aspartic-type endopeptidase activity	protein catabolic process Source: GO_Central proteolysis	pep:novel chromosome:IWGSC1.0+popseq:3B:29855893:29856957:-1 gene:TRAES3BF091400230CFD_g transcript:TRAES3BF091400230CFD_t1	35 kDa	1	0	[]
TRAES3BF091600060CFD_t1	?	?	pep:novel chromosome:IWGSC1.0+popseq:3B:674888262:674890048:1 gene:TRAES3BF091600060CFD_g transcript:TRAES3BF091600060CFD_t1	58 kDa	1	0	[]
TRAES3BF091600090CFD_t1 (+2)	acyl-[acyl-carrier-protein] desaturase activity Source: UniProtKB-EC metal ion binding Source: UniProtKB-KW stearoyl-[acp] desaturase activity	defense response Source: UniProtKB-KW fatty acid biosynthetic process	pep:novel chromosome:IWGSC1.0+popseq:3B:675020567:675024480:1 gene:TRAES3BF091600090CFD_g transcript:TRAES3BF091600090CFD_t1	44 kDa	1	0	[]
TRAES3BF102200010CFD_t1	protein membrane anchor Source: UniProtKB protein self-association	meiotic attachment of telomere to nuclear envelope Source: UniProtKB nucleus organization Source: UniProtKB protein heterooligomerization Source: UniProtKB protein homooligomerization Source: UniProtKB protein localization to nuclear envelope Source: UniProtKB regulation of establishment or maintenance of cell polarity regulating cell shape	pep:novel chromosome:IWGSC1.0+popseq:3B:19437187:19441466:-1 gene:TRAES3BF102200010CFD_g transcript:TRAES3BF102200010CFD_t1	47 kDa	1	0	[]
TRAES3BF105300040CFD_t1 (+2)	GTPase activity Source: InterPro GTP binding	ER to Golgi vesicle-mediated transport Source: TAIR protein transport Source: UniProtKB-KW response to cadmium ion	pep:novel chromosome:IWGSC1.0+popseq:3B:54111324:54114763:-1 gene:TRAES3BF105300040CFD_g transcript:TRAES3BF105300040CFD_t1 description:"RAS 5"	23 kDa	1	0	[]
TRAES3BF117500100CFD_t1 (+1)	GTPase activity Source: InterPro GTP binding	protein secretion Source: GO_Central regulation of exocytosis Source: GO_Central vesicle docking involved in exocytosis	pep:novel chromosome:IWGSC1.0+popseq:3B:597440033:597443560:1 gene:TRAES3BF117500100CFD_g transcript:TRAES3BF117500100CFD_t1	24 kDa	1	0	[]
TRAES3BF123400010CFD_t1		primary shoot apical meristem specification Source: TAIR regulation of transcription, DNA-templated Source: UniProtKB-KW transcription, DNA-templated	pep:novel chromosome:IWGSC1.0+popseq:3B:232434302:232444061:1 gene:TRAES3BF123400010CFD_g transcript:TRAES3BF123400010CFD_t1	125 kDa	1	0	[]
TRAES3BF128700050CFD_t1	3-hydroxyisobutyrate dehydrogenase activity Source: UniProtKB-EC NAD binding Source: InterPro phosphogluconate dehydrogenase (decarboxylating) activity	valine catabolic process	pep:novel chromosome:IWGSC1.0+popseq:3B:493698849:493699877:-1 gene:TRAES3BF128700050CFD_g transcript:TRAES3BF128700050CFD_t1	35 kDa	1	0	[]
TRAES3BF136200030CFD_t1 (+1)	GTPase activity Source: InterPro GTP binding Source: UniProtKB-KW structural constituent of cytoskeleton	microtubule-based process Source: TAIR response to cold Source: TAIR response to salt stress	pep:novel chromosome:IWGSC1.0+popseq:3B:693364107:693366005:1 gene:TRAES3BF136200030CFD_g transcript:TRAES3BF136200030CFD_t1	50 kDa	1	0	[]
TRAES3BF136500030CFD_t1	ATPase activity Source: GO_Central ATP binding Source: UniProtKB-KW microtubule binding Source: InterPro microtubule motor activity	microtubule-based movement	pep:novel chromosome:IWGSC1.0+popseq:3B:351429230:351432690:-1 gene:TRAES3BF136500030CFD_g transcript:TRAES3BF136500030CFD_t1 description:"ATP binding microtubule motor family protein"	86 kDa	1	0	[]
TRAES3BF136600060CFD_t1	endopeptidase activity Source: GO_Central SUMO-specific endopeptidase activity	positive regulation of flower development Source: TAIR protein desumoylation Source: UniProtKB regulation of flower development	pep:novel chromosome:IWGSC1.0+popseq:3B:713864737:713876095:1 gene:TRAES3BF136600060CFD_g transcript:TRAES3BF136600060CFD_t1	251 kDa	1	0	[]
TRAES3BF155200010CFD_t1	ATPase activity Source: GO_Central ATP binding Source: UniProtKB-KW GTP binding Source: UniProtKB-KW metal ion binding Source: UniProtKB-KW	negative regulation of response to salt stress Source: UniProtKB response to cadmium ion Source: TAIR response to salt stress	pep:novel chromosome:IWGSC1.0+popseq:3B:669974415:669988816:-1 gene:TRAES3BF155200010CFD_g transcript:TRAES3BF155200010CFD_t1 description:"GTP binding"	44 kDa	1	0	[]
TRAES3BF173900050CFD_t1	aminoacyl-tRNA editing activity Source: InterPro ATP binding Source: UniProtKB-KW valine-tRNA ligase activity	embryo development ending in seed dormancy Source: TAIR valyl-tRNA aminoacylation	pep:novel chromosome:IWGSC1.0+popseq:3B:121625442:121637582:-1 gene:TRAES3BF173900050CFD_g transcript:TRAES3BF173900050CFD_t1	143 kDa	1	0	[]
TRAES3BF239200010CFD_t1	translation initiation factor activity	photosystem II assembly	pep:novel scaffold:IWGSC1.0+popseq:v443_2392:114461:117285:1 gene:TRAES3BF239200010CFD_g transcript:TRAES3BF239200010CFD_t1 description:"NAD(P)-binding Rossmann-fold superfamily protein"	42 kDa	1	0	[]
TRAES3BF280800020CFD_t1	chitinase activity Source: UniProtKB-EC chitin binding	cell wall macromolecule catabolic process Source: InterPro chitin catabolic process Source: UniProtKB-KW defense response to fungus Source: UniProtKB-KW killing of cells of other organism Source: UniProtKB-KW plant-type hypersensitive response Source: UniProtKB-KW polysaccharide catabolic process Source: UniProtKB-KW response to cadmium ion	pep:novel scaffold:IWGSC1.0+popseq:v443_2808:136768:137730:1 gene:TRAES3BF280800020CFD_g transcript:TRAES3BF280800020CFD_t1	34 kDa	1	0	[]
Traes_2AL_3E4F9254A.1	xylan 1,4-beta-xylosidase activity	systemic acquired resistance Source: TAIR xylan catabolic process	Ortholog: Encodes a beta-d-xylosidase that belongs to family 3 of glycoside hydrolases	82 kDa	1	0.000948845	[]
Traes_2AS_BE8D336DB.1	copper ion binding Source: TAIR ribosomal large subunit binding	chloroplast organization Source: TAIR cytoplasmic translational termination Source: GO_Central defense response to bacterium Source: TAIR defense response to fungus, incompatible interaction Source: TAIR embryo development ending in seed dormancy Source: TAIR plastid translation	pep:novel chromosome:IWGSC1.0+popseq:2A:195648260:195652814:-1 gene:Traes_2AS_BE8D336DB transcript:Traes_2AS_BE8D336DB.1 description:"ribosome recycling factor, chloroplast precursor"	29 kDa	1	-0.00160961	[]
Traes_3AS_6505083E0.1	sucrose-phosphate synthase activity Source: TAIR sucrose synthase activity	nectar secretion Source: UniProtKB sucrose biosynthetic process	Ortholog: Encodes a protein with putative sucrose-phosphate synthase activity. When the gene was expressed in transgenic tobacco plants, a clear trend for increased SPS activity was noted	110 kDa	1	-0.00116755	[]
Traes_4BS_D0ECFDAB8.1	?	?	pep:novel chromosome:IWGSC1.0+popseq:4B:164469265:164470318:-1 gene:Traes_4BS_D0ECFDAB8 transcript:Traes_4BS_D0ECFDAB8.1	19 kDa	1	-0.000464724	[]
Traes_6DL_3FD1DA8AA.1	mRNA binding Source: TAIR RNA binding Source: GO_Central structural constituent of ribosome	cytoplasmic translation Source: GO_Central ribosomal large subunit assembly	pep:novel chromosome:IWGSC1.0+popseq:6D:128552481:128554229:-1 gene:Traes_6DL_3FD1DA8AA transcript:Traes_6DL_3FD1DA8AA.1	24 kDa	1	0.000549598	[]
Traes_7AL_D93FC054C.1	copper ion binding Source: TAIR DNA binding Source: UniProtKB-KW glyceraldehyde-3-phosphate dehydrogenase (NAD+) (phosphorylating) activity Source: UniProtKB NAD binding Source: InterPro NADP binding Source: InterPro zinc ion binding	defense response to bacterium Source: TAIR gluconeogenesis Source: TAIR glycolytic process Source: TAIR response to cadmium ion Source: TAIR response to oxidative stress	pep:novel scaffold:IWGSC1.0+popseq:IWGSC_CSS_7AL_scaff_4530762:3076:6183:1 gene:Traes_7AL_D93FC054C transcript:Traes_7AL_D93FC054C.1	38 kDa	1	-0.000126922	[]
Traes_7DL_1A46C6743.1	ATPase activity Source: TAIR ATP binding Source: UniProtKB-KW magnesium chelatase activity	chlorophyll biosynthetic process Source: TAIR photosynthesis Source: UniProtKB-KW response to cytokinin	Ortholog: Encodes the CHLI subunit of magnesium chelatase which is required for chlorophyll biosynthesis	46 kDa	1	-0.000928706	[]
Traes_7DL_1CBD5E967.1	copper ion binding Source: TAIR glutathione transferase activity Source: GO_Central translation elongation factor activity	glutathione metabolic process Source: GO_Central response to cadmium ion Source: TAIR response to zinc ion	Ortholog: Translation elongation factor EF1B, gamma chain; FUNCTIONS IN: copper ion binding, translation elongation factor activity; INVOLVED IN: response to cadmium ion, response to zinc ion	47 kDa	1	-0.000148247	[]
Traes_1AL_0FB80B128.1 (+1)	GTP binding Source: UniProtKB-KW uracil phosphoribosyltransferase activity Source: TAIR uridine kinase activity	cellular response to phosphate starvation Source: TAIR developmental process Source: TAIR pyrimidine nucleobase metabolic process Source: GO_Central pyrimidine nucleoside salvage Source: GO_Central UMP salvage Source: UniProtKB-UniPathway uracil salvage	pep:novel chromosome:IWGSC1.0+popseq:1A:205284603:205287609:-1 gene:Traes_1AL_0FB80B128 transcript:Traes_1AL_0FB80B128.1	19 kDa	0.99	-0.0146056	[]
Traes_1AL_70F3FF07D.2	structural constituent of ribosome	cytoplasmic translation Source: GO_Central response to cold Source: TAIR translational elongation	60S acidic ribosomal protein P2	12 kDa	0.99	0.00529378	[]
Traes_2BL_07012A914.1	calcium ion binding	photosynthesis	pep:novel chromosome:IWGSC1.0+popseq:2B:145421816:145423892:1 gene:Traes_2BL_07012A914 transcript:Traes_2BL_07012A914.1 description:"Mog1/PsbP/DUF1795-like photosystem II reaction center PsbP family protein"	29 kDa	0.99	0.00439941	[]
Traes_3DL_86B0D75D9.2	aminoacyl-tRNA ligase activity Source: UniProtKB-KW tRNA binding	tRNA aminoacylation for protein translation	pep:novel scaffold:IWGSC1.0+popseq:IWGSC_CSS_3DL_scaff_6896747:1119:6938:-1 gene:Traes_3DL_86B0D75D9 transcript:Traes_3DL_86B0D75D9.2 description:"Nucleic acid-binding, OB-fold-like protein"	44 kDa	0.99	-0.0146056	[]
Traes_4BL_D03F777D1.1	glutathione transferase activity	glutathione metabolic process Source: GO_Central response to oxidative stress Source: TAIR toxin catabolic process	pep:novel chromosome:IWGSC1.0+popseq:4B:300124935:300125883:1 gene:Traes_4BL_D03F777D1 transcript:Traes_4BL_D03F777D1.1	20 kDa	0.99	-0.0145929	[]
Traes_4DL_258AD9567.1 (+1)	GTPase activity Source: GO_Central GTP binding Source: UniProtKB-KW translation elongation factor activity	response to cadmium ion	Ortholog: GTP binding Elongation factor Tu family protein; FUNCTIONS IN: calmodulin binding, translation elongation factor activity; INVOLVED IN: translational elongation	44 kDa	0.99	0.00182343	[]
Traes_5AL_106BEC5D4.1	mRNA binding Source: TAIR structural constituent of ribosome	translation	pep:novel scaffold:IWGSC1.0+popseq:IWGSC_CSS_5AL_scaff_2690175:1:1901:1 gene:Traes_5AL_106BEC5D4 transcript:Traes_5AL_106BEC5D4.1	14 kDa	0.99	-0.00945943	[]
Traes_5AS_178DFC4E3.1	acyl binding Source: GO_Central acyl carrier activity Source: TAIR phosphopantetheine binding	lipid A biosynthetic process Source: GO_Central response to salt stress	pep:novel scaffold:IWGSC1.0+popseq:IWGSC_CSS_5AS_scaff_1461169:746:4086:-1 gene:Traes_5AS_178DFC4E3 transcript:Traes_5AS_178DFC4E3.1	16 kDa	0.99	0.0342326	[]
Traes_5BL_EBD050E21.2 (+1)	GTPase activity Source: InterPro GTP binding Source: UniProtKB-KW structural constituent of cytoskeleton	microtubule-based process	Tubulin beta-4 chain	50 kDa	0.99	-0.00357499	[]
Traes_5DL_937B155F1.1	ATP binding Source: InterPro heat shock protein binding Source: InterPro metal ion binding Source: UniProtKB-KW unfolded protein binding	protein folding Source: InterPro response to heat	pep:novel scaffold:IWGSC1.0+popseq:IWGSC_CSS_5DL_scaff_4512777:57:4799:1 gene:Traes_5DL_937B155F1 transcript:Traes_5DL_937B155F1.1	45 kDa	0.99	-0.0145929	[]
Traes_6AS_1E6A90D78.1	translation initiation factor activity Source: UniProtKB-KW translation initiation factor binding	embryo development ending in seed dormancy Source: TAIR pollen germination Source: TAIR response to sucrose Source: UniProtKB translational initiation	pep:novel chromosome:IWGSC1.0+popseq:6A:25059466:25062243:1 gene:Traes_6AS_1E6A90D78 transcript:Traes_6AS_1E6A90D78.1 description:"eukaryotic translation initiation factor 2"	32 kDa	0.99	-0.0145929	[]
Traes_6AS_26E908F59.1		proteasome-mediated ubiquitin-dependent protein catabolic process	pep:novel scaffold:IWGSC1.0+popseq:IWGSC_CSS_6AS_scaff_4403258:3746:10991:-1 gene:Traes_6AS_26E908F59 transcript:Traes_6AS_26E908F59.1	98 kDa	0.99	0.00946121	[]
Traes_6DL_241D10DDA.1	3-isopropylmalate dehydratase activity	chloroplast organization Source: TAIR gametophyte development Source: UniProtKB glucosinolate biosynthetic process Source: TAIR leucine biosynthetic process Source: UniProtKB response to salt stress	pep:novel chromosome:IWGSC1.0+popseq:6D:61206832:61212034:1 gene:Traes_6DL_241D10DDA transcript:Traes_6DL_241D10DDA.1	20 kDa	0.99	0.0342326	[]
TRAES3BF167600010CFD_t1	?	?	Ortholog: Tetratricopeptide repeat (TPR)-like superfamily protein; FUNCTIONS IN: molecular_function unknown	21 kDa	0.99	-0.00303158	[]
Traes_1AL_B01B26670.1	RNA binding Source: GO_Central rRNA binding Source: UniProtKB-KW structural constituent of ribosome	maturation of LSU-rRNA Source: GO_Central translation	pep:novel scaffold:IWGSC1.0+popseq:IWGSC_CSS_1AL_scaff_3879210:1:1401:1 gene:Traes_1AL_B01B26670 transcript:Traes_1AL_B01B26670.1	14 kDa	0.98	0.0117723	[]
Traes_1DS_B74218BA2.1	copper ion binding	defense response to bacterium	pep:novel chromosome:IWGSC1.0+popseq:1D:5018996:5021374:1 gene:Traes_1DS_B74218BA2 transcript:Traes_1DS_B74218BA2.1	32 kDa	0.98	0.0116706	[]
Traes_2DL_28DFAC79D.2	protein-disulfide reductase activity Source: UniProtKB-EC thioredoxin-disulfide reductase activity	cell redox homeostasis Source: InterPro pollen tube growth Source: TAIR pollen tube guidance Source: TAIR regulation of pollen tube growth Source: UniProtKB response to cadmium ion	DC1 domain-containing protein	64 kDa	0.98	-0.0196174	[]
Traes_5BL_6E029E99B.1	chlorophyll binding	photosynthesis Source: TAIR photosynthetic electron transport in photosystem I Source: TAIR photosynthetic NADP+ reduction Source: TAIR photosystem I stabilization Source: TAIR protein stabilization	pep:novel scaffold:IWGSC1.0+popseq:IWGSC_CSS_5BL_scaff_10913160:7063:8018:1 gene:Traes_5BL_6E029E99B transcript:Traes_5BL_6E029E99B.1 description:"photosystem I subunit G"	15 kDa	0.98	-0.00349964	[]
Traes_5BL_A8B4F5EC6.1	DNA binding	nucleosome assembly	pep:novel chromosome:IWGSC1.0+popseq:5B:243623174:243624473:1 gene:Traes_5BL_A8B4F5EC6 transcript:Traes_5BL_A8B4F5EC6.1 description:"Histone H1 "	32 kDa	0.98	-0.0123872	[]
Traes_6DS_6115C576B.1	fumarylacetoacetase activity Source: TAIR metal ion binding	cell death Source: TAIR homogentisate catabolic process Source: TAIR L-phenylalanine catabolic process Source: UniProtKB-UniPathway tyrosine catabolic process	pep:novel chromosome:IWGSC1.0+popseq:6D:119638078:119642367:1 gene:Traes_6DS_6115C576B transcript:Traes_6DS_6115C576B.1	47 kDa	0.98	0.00835287	[]
TRAES3BF091100230CFD_t1		protein sumoylation	Ortholog: Encodes a small ubiquitin-like modifier (SUMO) polypeptide that becomes covalently attached to various intracellular protein targets, much like ubiquitination, leading to post-translational modification of those targets	11 kDa	0.98	0.0457116	[]
Traes_1AS_A53D11A37.1	malate dehydrogenase (decarboxylating) (NAD+) activity Source: InterPro malate dehydrogenase (decarboxylating) (NADP+) activity Source: TAIR metal ion binding Source: UniProtKB-KW NAD binding Source: InterPro oxaloacetate decarboxylase activity	malate metabolic process Source: TAIR pentose-phosphate shunt, oxidative branch Source: TAIR protein homooligomerization Source: TAIR pyruvate metabolic process Source: GO_Central response to cadmium ion	Ortholog: The malic enzyme (EC 1.1.1.40) encoded by AtNADP-ME2 is presumably a cytosolic enzyme involved in malate metabolism and possibly assisting the oxidative pentose phosphate pathway	63 kDa	0.97	-0.0839846	[]
Traes_1BS_4AE36382E.1		plant-type secondary cell wall biogenesis	pep:novel chromosome:IWGSC1.0+popseq:1B:58970202:58971451:1 gene:Traes_1BS_4AE36382E transcript:Traes_1BS_4AE36382E.1	27 kDa	0.97	0.0247168	[]
Traes_2AL_E80BC759C.1	sucrose alpha-glucosidase activity	nectar secretion Source: TAIR starch metabolic process Source: TAIR sucrose catabolic process	pep:novel chromosome:IWGSC1.0+popseq:2A:235323589:235329730:-1 gene:Traes_2AL_E80BC759C transcript:Traes_2AL_E80BC759C.1	65 kDa	0.97	0.0502744	[]
Traes_2BS_8684E0E15.1	glyceraldehyde-3-phosphate dehydrogenase (NADP+) (non-phosphorylating) activity		Aldehyde dehydrogenase 11A3	53 kDa	0.97	0.0148569	[]
Traes_4AL_00D18D2CC.1	copper ion binding Source: InterPro electron transporter, transferring electrons from cytochrome b6/f complex of photosystem II activity Source: CACAO protein domain specific binding	copper ion homeostasis Source: TAIR negative regulation of translation Source: TAIR response to copper ion	pep:novel scaffold:IWGSC1.0+popseq:IWGSC_CSS_4AL_scaff_7148983:3027:4281:1 gene:Traes_4AL_00D18D2CC transcript:Traes_4AL_00D18D2CC.1	16 kDa	0.97	-0.0150337	[]
Traes_5BL_051A88B95.2	glutathione binding Source: TAIR glutathione transferase activity Source: TAIR peroxidase activity	cellular response to water deprivation Source: TAIR glutathione metabolic process Source: GO_Central response to cadmium ion Source: TAIR response to oxidative stress Source: TAIR toxin catabolic process	pep:novel chromosome:IWGSC1.0+popseq:5B:234599438:234600755:1 gene:Traes_5BL_051A88B95 transcript:Traes_5BL_051A88B95.2	25 kDa	0.97	-0.0840101	[]
Traes_5BL_917DF323B.1	DNA binding	nucleosome assembly Source: InterPro regulation of transcription, DNA-templated	pep:novel chromosome:IWGSC1.0+popseq:5B:107098185:107099843:-1 gene:Traes_5BL_917DF323B transcript:Traes_5BL_917DF323B.1	19 kDa	0.97	0.0126262	[]
Traes_5BS_23ED32DC9.1	GTP binding	intracellular protein transport Source: InterPro vesicle-mediated transport	pep:novel chromosome:IWGSC1.0+popseq:5B:148617494:148621025:1 gene:Traes_5BS_23ED32DC9 transcript:Traes_5BS_23ED32DC9.1	22 kDa	0.97	0.0575156	[]
Traes_5BS_E431D5D9D.1	5-methyltetrahydropteroyltriglutamate-homocysteine S-methyltransferase activity Source: GO_Central copper ion binding Source: TAIR methionine synthase activity Source: TAIR zinc ion binding	homocysteine metabolic process Source: GO_Central response to cadmium ion Source: TAIR response to salt stress Source: TAIR response to zinc ion	pep:novel chromosome:IWGSC1.0+popseq:5B:13381175:13391171:-1 gene:Traes_5BS_E431D5D9D transcript:Traes_5BS_E431D5D9D.1	85 kDa	0.97	-0.00921548	[]
Traes_1AL_197423E8E.1 (+1)	ATP binding Source: UniProtKB-KW core promoter binding Source: CAFA fructokinase activity Source: TAIR glucokinase activity Source: TAIR glucose binding Source: InterPro hexokinase activity Source: TAIR mannokinase activity Source: GO_Central zinc ion binding	glucose mediated signaling pathway Source: CAFA glycolytic process Source: GO_Central hexose catabolic process Source: TAIR programmed cell death Source: TAIR regulation of transcription by RNA polymerase II Source: CAFA stomatal closure Source: TAIR sugar mediated signaling pathway Source: TAIR transpiration	pep:novel chromosome:IWGSC1.0+popseq:1A:229889061:229893816:1 gene:Traes_1AL_197423E8E transcript:Traes_1AL_197423E8E.1	47 kDa	0.96	0.103624	[]
Traes_1DL_8F653C2D9.1	?	?	pep:novel scaffold:IWGSC1.0+popseq:IWGSC_CSS_1DL_scaff_2289649:1066:7857:1 gene:Traes_1DL_8F653C2D9 transcript:Traes_1DL_8F653C2D9.1	87 kDa	0.96	0.10365	[]
Traes_1DS_FAE249779.1	?	?	pep:novel chromosome:IWGSC1.0+popseq:1D:86633771:86637154:-1 gene:Traes_1DS_FAE249779 transcript:Traes_1DS_FAE249779.1	20 kDa	0.96	0.117778	[]
Traes_2AL_BD1BD7A55.1	nutrient reservoir activity Source: UniProtKB-KW small molecule binding	lipid metabolic process Source: UniProtKB-KW negative regulation of fatty acid oxidation Source: UniProtKB response to abscisic acid Source: UniProtKB response to heat Source: UniProtKB response to high light intensity Source: UniProtKB response to oxidative stress Source: TAIR response to paraquat Source: UniProtKB response to water deprivation Source: UniProtKB seed maturation	pep:novel chromosome:IWGSC1.0+popseq:2A:225494035:225496176:1 gene:Traes_2AL_BD1BD7A55 transcript:Traes_2AL_BD1BD7A55.1 description:"chloroplastic lipocalin"	37 kDa	0.96	0.103668	[]
Traes_2AS_E714D8C86.1 (+2)	mRNA binding Source: TAIR RNA binding Source: GO_Central structural constituent of ribosome	translation	pep:novel scaffold:IWGSC1.0+popseq:IWGSC_CSS_2AS_scaff_5273927:5149:7294:-1 gene:Traes_2AS_E714D8C86 transcript:Traes_2AS_E714D8C86.1	21 kDa	0.96	0.117778	[]
Traes_2BS_3F8D903181.2	transcription factor binding	long-day photoperiodism, flowering Source: UniProtKB regulation of timing of transition from vegetative to reproductive phase Source: UniProtKB vegetative to reproductive phase transition of meristem	pep:novel chromosome:IWGSC1.0+popseq:2B:209288724:209289728:-1 gene:Traes_2BS_3F8D903181 transcript:Traes_2BS_3F8D903181.2	36 kDa	0.96	0.103631	[]
Traes_4AL_DE0A5BAB2.1 (+1)	dihydrolipoyllysine-residue succinyltransferase activity Source: UniProtKB-EC zinc ion binding	L-lysine catabolic process to acetyl-CoA via saccharopine Source: UniProtKB-UniPathway response to oxidative stress Source: TAIR tricarboxylic acid cycle	pep:novel scaffold:IWGSC1.0+popseq:IWGSC_CSS_4AL_scaff_6138094:29:2681:1 gene:Traes_4AL_DE0A5BAB2 transcript:Traes_4AL_DE0A5BAB2.1	39 kDa	0.96	0.103624	[]
Traes_4AS_B97A404E2.2	chromatin binding Source: TAIR DNA binding Source: UniProtKB-KW protein heterodimerization activity		pep:novel scaffold:IWGSC1.0+popseq:IWGSC_CSS_4AS_scaff_5943789:9642:10326:1 gene:Traes_4AS_B97A404E2 transcript:Traes_4AS_B97A404E2.2	17 kDa	0.96	0.0174122	[]
Traes_5DS_1BD5492E6.1	5-methyltetrahydropteroyltriglutamate-homocysteine S-methyltransferase activity Source: GO_Central copper ion binding Source: TAIR methionine synthase activity Source: TAIR zinc ion binding	homocysteine metabolic process Source: GO_Central response to cadmium ion Source: TAIR response to salt stress Source: TAIR response to zinc ion	pep:novel chromosome:IWGSC1.0+popseq:5D:12462500:12468265:1 gene:Traes_5DS_1BD5492E6 transcript:Traes_5DS_1BD5492E6.1	85 kDa	0.96	0.0143724	[]
Traes_5DS_1BE0927E1.2	mRNA binding Source: TAIR translation elongation factor activity	mitochondrial translational elongation Source: GO_Central response to cadmium ion	Elongation factor Ts family protein	109 kDa	0.96	0.0149109	[]
Traes_5DS_3C0D10B64.1	L-malate dehydrogenase activity	glyoxylate cycle Source: UniProtKB-KW malate metabolic process Source: InterPro regulation of fatty acid beta-oxidation Source: TAIR regulation of photorespiration Source: TAIR tricarboxylic acid cycle	pep:novel scaffold:IWGSC1.0+popseq:IWGSC_CSS_5DS_scaff_2770252:3544:7868:1 gene:Traes_5DS_3C0D10B64 transcript:Traes_5DS_3C0D10B64.1	37 kDa	0.96	-0.0465689	[]
Traes_6AL_033D6C680.1	actin binding Source: TAIR copper ion binding Source: CAFA nickel cation binding Source: CAFA phosphatidylcholine binding Source: CAFA phosphatidylserine binding	cold acclimation Source: TAIR protein stabilization Source: CAFA regulation of membrane permeability Source: CAFA regulation of seed germination Source: TAIR response to abscisic acid Source: TAIR response to cold Source: TAIR response to water deprivation	pep:known chromosome:IWGSC1.0+popseq:6A:149026718:149028356:1 gene:Traes_6AL_033D6C680 transcript:Traes_6AL_033D6C680.1 description:"Dehydrin COR410 "	29 kDa	0.96	-0.0433934	[]
Traes_6AL_2C61320D2.1	FK506 binding Source: GO_Central peptidyl-prolyl cis-trans isomerase activity	chaperone-mediated protein folding	pep:novel chromosome:IWGSC1.0+popseq:6A:188934910:188936706:1 gene:Traes_6AL_2C61320D2 transcript:Traes_6AL_2C61320D2.1 description:"FK506-binding protein 16-2"	22 kDa	0.96	-0.0595945	[]
Traes_6AL_4DD40E478.1 (+1)	?	?	pep:novel chromosome:IWGSC1.0+popseq:6A:92809935:92815328:-1 gene:Traes_6AL_4DD40E478 transcript:Traes_6AL_4DD40E478.1 description:"Pentapeptide repeat-containing protein"	28 kDa	0.96	-0.0164026	[]
Traes_6AL_9CC1C1B13.2 (+1)	aspartic-type endopeptidase activity	protein catabolic process Source: GO_Central proteolysis	pep:novel chromosome:IWGSC1.0+popseq:6A:169900967:169905928:1 gene:Traes_6AL_9CC1C1B13 transcript:Traes_6AL_9CC1C1B13.2 description:"Eukaryotic aspartyl protease family protein"	49 kDa	0.96	0.10365	[]
Traes_6DL_5C536D720.1	4 iron, 4 sulfur cluster binding Source: UniProtKB-KW ferredoxin-nitrite reductase activity Source: UniProtKB-EC heme binding Source: InterPro metal ion binding Source: UniProtKB-KW nitrite reductase (NO-forming) activity	nitrate assimilation Source: UniProtKB-UniPathway response to nitrate	Nitrite reductase 1	56 kDa	0.96	-0.0381202	[]
Traes_7DL_6B655C9BA.1	clathrin heavy chain binding Source: GO_Central structural molecule activity	clathrin-dependent endocytosis Source: GO_Central intracellular protein transport	pep:novel chromosome:IWGSC1.0+popseq:7D:232455507:232458146:1 gene:Traes_7DL_6B655C9BA transcript:Traes_7DL_6B655C9BA.1	23 kDa	0.96	0.10365	[]
Traes_7DL_7AC725D12.2	dihydrolipoyllysine-residue acetyltransferase activity	glycolytic process	pep:novel chromosome:IWGSC1.0+popseq:7D:147568632:147574798:-1 gene:Traes_7DL_7AC725D12 transcript:Traes_7DL_7AC725D12.2 description:"Dihydrolipoamide acetyltransferase, long form protein"	62 kDa	0.96	0.074901	[]
Traes_7DS_430DB75AC.1	FMN binding Source: InterPro NADPH-hemoprotein reductase activity Source: InterPro oxidoreductase activity, acting on NAD(P)H	embryo development ending in seed dormancy	pep:novel scaffold:IWGSC1.0+popseq:IWGSC_CSS_7DS_scaff_3871259:1:383:1 gene:Traes_7DS_430DB75AC transcript:Traes_7DS_430DB75AC.1	11 kDa	0.96	0.117765	[]
Traes_1AL_06E2D1837.1	hydrolase activity	response to salt stress	pep:novel scaffold:IWGSC1.0+popseq:IWGSC_CSS_1AL_scaff_3779972:1:2723:-1 gene:Traes_1AL_06E2D1837 transcript:Traes_1AL_06E2D1837.1	25 kDa	0.95	0.0236764	[]
Traes_2AL_3F84846F1.1 (+2)	ATP binding Source: TAIR cobalt ion binding Source: TAIR copper ion binding Source: TAIR glutamate dehydrogenase (NAD+) activity Source: TAIR glutamate dehydrogenase [NAD(P)+] activity Source: TAIR zinc ion binding	cellular amino acid metabolic process Source: InterPro response to cadmium ion Source: TAIR response to salt stress	pep:novel chromosome:IWGSC1.0+popseq:2A:221677113:221682064:1 gene:Traes_2AL_3F84846F1 transcript:Traes_2AL_3F84846F1.1 description:"glutamate dehydrogenase 2"	45 kDa	0.95	-0.0714029	[]
Traes_4AL_7EFEEF7C9.1 (+3)	mRNA binding Source: TAIR structural constituent of ribosome	cytoplasmic translation	pep:novel scaffold:IWGSC1.0+popseq:IWGSC_CSS_4AL_scaff_7154505:2284:3987:1 gene:Traes_4AL_7EFEEF7C9 transcript:Traes_4AL_7EFEEF7C9.1	28 kDa	0.95	-0.145227	[]
Traes_6AS_82E93D872.1	peptidyl-prolyl cis-trans isomerase activity	blue light signaling pathway Source: TAIR brassinosteroid mediated signaling pathway Source: TAIR de-etiolation Source: TAIR plant-type hypersensitive response Source: UniProtKB-KW protein folding Source: InterPro red, far-red light phototransduction Source: TAIR regulation of protein phosphorylation Source: TAIR response to cadmium ion Source: TAIR response to cytokinin Source: TAIR response to …	pep:novel scaffold:IWGSC1.0+popseq:IWGSC_CSS_6AS_scaff_4374443:3394:4848:-1 gene:Traes_6AS_82E93D872 transcript:Traes_6AS_82E93D872.1	18 kDa	0.95	-0.0193941	[]
Traes_7AL_C84D25819.2	structural constituent of ribosome		pep:novel chromosome:IWGSC1.0+popseq:7A:168119856:168121173:1 gene:Traes_7AL_C84D25819 transcript:Traes_7AL_C84D25819.2	15 kDa	0.95	0.0164572	[]
TRAES3BF058700080CFD_t1 (+1)	ATP binding Source: UniProtKB-KW copper ion binding Source: TAIR proton-transporting ATP synthase activity, rotational mechanism	ATP synthesis coupled proton transport Source: InterPro response to cadmium ion	pep:novel chromosome:IWGSC1.0+popseq:3B:478117445:478121102:-1 gene:TRAES3BF058700080CFD_g transcript:TRAES3BF058700080CFD_t1	45 kDa	0.95	-0.0744383	[]
TRAES3BF086500010CFD_t1 (+1)	hydrolase activity	response to stress	pep:novel chromosome:IWGSC1.0+popseq:3B:545658647:545659483:1 gene:TRAES3BF086500010CFD_g transcript:TRAES3BF086500010CFD_t1	29 kDa	0.95	0.0212858	[]
Traes_2BS_E35529023.1	4 iron, 4 sulfur cluster binding Source: UniProtKB-KW FMN binding Source: InterPro metal ion binding Source: UniProtKB-KW NAD binding Source: InterPro NADH dehydrogenase (ubiquinone) activity		51 kDa subunit of complex I	57 kDa	0.94	-0.0826537	[]
Traes_4BL_9A65F7C8B.1	rRNA binding Source: GO_Central structural constituent of ribosome	ribosomal large subunit assembly Source: GO_Central translation	pep:novel scaffold:IWGSC1.0+popseq:IWGSC_CSS_4BL_scaff_6978006:1366:3805:-1 gene:Traes_4BL_9A65F7C8B transcript:Traes_4BL_9A65F7C8B.1	27 kDa	0.94	-0.0981364	[]
Traes_4BS_A8F01CCC5.1	?	?	pep:novel chromosome:IWGSC1.0+popseq:4B:194671489:194676098:1 gene:Traes_4BS_A8F01CCC5 transcript:Traes_4BS_A8F01CCC5.1 description:"oxidoreductases, acting on the aldehyde or oxo group of donors, NAD or NADP as acceptor\x3bcopper ion binding"	64 kDa	0.94	-0.0295073	[]
Traes_5DS_922F3F6EA.1	ATP binding Source: UniProtKB-KW metal ion binding Source: UniProtKB-KW nucleoside diphosphate kinase activity	auxin-activated signaling pathway Source: TAIR CTP biosynthetic process Source: InterPro GTP biosynthetic process Source: InterPro red, far-red light phototransduction Source: TAIR response to hydrogen peroxide Source: TAIR response to UV Source: TAIR UTP biosynthetic process	pep:novel scaffold:IWGSC1.0+popseq:IWGSC_CSS_5DS_scaff_2501505:167:5066:-1 gene:Traes_5DS_922F3F6EA transcript:Traes_5DS_922F3F6EA.1 description:"nucleoside diphosphate kinase 2"	24 kDa	0.94	0.0262243	[]
Traes_6AL_D9C3BC088.1	?	?	pep:novel chromosome:IWGSC1.0+popseq:6A:184411147:184412970:-1 gene:Traes_6AL_D9C3BC088 transcript:Traes_6AL_D9C3BC088.1	36 kDa	0.94	0.083571	[]
Traes_6BS_8CB3E58AE.1	RNA binding Source: GO_Central structural constituent of ribosome	translation	pep:novel scaffold:IWGSC1.0+popseq:IWGSC_CSS_6BS_scaff_2121845:4378:5788:-1 gene:Traes_6BS_8CB3E58AE transcript:Traes_6BS_8CB3E58AE.1	22 kDa	0.94	-0.0769295	[]
Traes_6DL_5282E0007.1	aspartic-type endopeptidase activity	protein catabolic process Source: GO_Central proteolysis	pep:novel chromosome:IWGSC1.0+popseq:6D:117780957:117785067:-1 gene:Traes_6DL_5282E0007 transcript:Traes_6DL_5282E0007.1	47 kDa	0.94	-0.0905675	[]
Traes_7DL_C104E3D30.1	flavin adenine dinucleotide binding Source: TAIR N1-acetylspermine:oxygen oxidoreductase (N1-acetylspermidine-forming) activity Source: UniProtKB-EC norspermine:oxygen oxidoreductase activity Source: UniProtKB-EC polyamine oxidase activity Source: TAIR spermine:oxygen oxidoreductase (spermidine-forming) activity	polyamine catabolic process Source: TAIR spermine catabolic process	Ortholog: Encodes a protein with polyamine oxidase activity. The mRNA of this gene is only expressed in very low amounts in the organs where it was detected (light-grown plants)	57 kDa	0.94	0.0645546	[]
Traes_1BL_C8FE2382C.1	mRNA binding	abscisic acid-activated signaling pathway Source: UniProtKB-KW cellular response to osmotic stress Source: TAIR cellular response to salt stress Source: TAIR regulation of abscisic acid-activated signaling pathway Source: UniProtKB response to abscisic acid Source: UniProtKB response to osmotic stress Source: UniProtKB response to salt stress	pep:novel chromosome:IWGSC1.0+popseq:1B:270344701:270347650:1 gene:Traes_1BL_C8FE2382C transcript:Traes_1BL_C8FE2382C.1	34 kDa	0.93	0.0554856	[]
Traes_2BL_A687959FB.2	ATP binding Source: UniProtKB-KW blue light photoreceptor activity Source: TAIR FMN binding Source: UniProtKB identical protein binding Source: UniProtKB kinase activity Source: TAIR phosphorelay sensor kinase activity Source: InterPro protein serine/threonine kinase activity	chloroplast relocation Source: TAIR circadian rhythm Source: TAIR intracellular signal transduction Source: GO_Central negative regulation of anion channel activity by blue light Source: TAIR phototropism Source: TAIR protein autophosphorylation Source: TAIR protein-chromophore linkage Source: UniProtKB-KW response to blue light Source: TAIR response to cytokinin Source: TAIR stomatal movement	pep:novel chromosome:IWGSC1.0+popseq:2B:106106398:106123267:-1 gene:Traes_2BL_A687959FB transcript:Traes_2BL_A687959FB.2 description:"phototropin 2"	88 kDa	0.93	0.113696	[]
Traes_3DS_C74F56379.1	calcium ion binding Source: UniProtKB calmodulin binding Source: UniProtKB copper ion binding Source: UniProtKB microtubule binding Source: UniProtKB phosphatidylinositol-3,4,5-trisphosphate binding Source: UniProtKB phosphatidylinositol-3,4-bisphosphate binding Source: UniProtKB phosphatidylinositol-3,5-bisphosphate binding Source: UniProtKB phosphatidylinositol-4,5-bisphosphate binding	cellular response to copper ion Source: UniProtKB cellular response to iron ion Source: UniProtKB cellular response to magnesium ion Source: UniProtKB cellular response to magnesium starvation Source: UniProtKB cellular response to mannitol stimulus Source: UniProtKB cellular response to molecule of bacterial origin Source: UniProtKB cellular response to potassium ion Source: UniProtKB cellular r…	pep:novel scaffold:IWGSC1.0+popseq:IWGSC_CSS_3DS_scaff_2597472:2003:3602:1 gene:Traes_3DS_C74F56379 transcript:Traes_3DS_C74F56379.1	15 kDa	0.93	0.191937	[]
Traes_4BL_F8C1990BA.1	metalloendopeptidase activity Source: GO_Central oxidoreductase activity Source: UniProtKB-KW zinc ion binding	aerobic respiration Source: GO_Central mitochondrial electron transport, ubiquinol to cytochrome c Source: GO_Central protein processing	pep:novel chromosome:IWGSC1.0+popseq:4B:251674664:251679290:-1 gene:Traes_4BL_F8C1990BA transcript:Traes_4BL_F8C1990BA.1 description:"Insulinase (Peptidase family M16) protein"	54 kDa	0.93	-0.018602	[]
Traes_5BS_DD7558B02.2 (+1)	?	?	pep:novel chromosome:IWGSC1.0+popseq:5B:70473076:70476473:1 gene:Traes_5BS_DD7558B02 transcript:Traes_5BS_DD7558B02.2	16 kDa	0.93	-0.186393	[]
Traes_6BL_54182EEB2.1	acetyl-CoA C-acyltransferase activity	oxylipin biosynthetic process	pep:novel scaffold:IWGSC1.0+popseq:IWGSC_CSS_6BL_scaff_2271874:126:2562:-1 gene:Traes_6BL_54182EEB2 transcript:Traes_6BL_54182EEB2.1	46 kDa	0.93	0.196112	[]
Traes_6DL_75417C63D.1	voltage-gated ion channel activity	potassium ion transport Source: UniProtKB-KW regulation of ion transmembrane transport	Potassium channel beta subunit 1	30 kDa	0.93	-0.0287017	[]
Traes_7AS_DC51A1D61.1	chlorophyll binding Source: GO_Central metal ion binding Source: UniProtKB-KW pigment binding Source: GO_Central protein domain specific binding	photosynthesis, light harvesting in photosystem I Source: UniProtKB protein-chromophore linkage Source: UniProtKB-KW response to blue light Source: TAIR response to cold Source: UniProtKB response to far red light Source: TAIR response to high light intensity Source: UniProtKB response to low light intensity stimulus Source: UniProtKB response to red light	pep:novel chromosome:IWGSC1.0+popseq:7A:51516232:51517724:-1 gene:Traes_7AS_DC51A1D61 transcript:Traes_7AS_DC51A1D61.1 description:"photosystem I light harvesting complex gene 1"	26 kDa	0.93	0.0475852	[]
Traes_7DL_35C4D1A4C.1	L-malate dehydrogenase activity Source: TAIR NAD(P)+ transhydrogenase activity	carbohydrate metabolic process Source: InterPro embryo development ending in seed dormancy Source: TAIR malate metabolic process Source: InterPro response to cold Source: TAIR response to cytokinin Source: TAIR tricarboxylic acid cycle	pep:novel chromosome:IWGSC1.0+popseq:7D:155670668:155672475:-1 gene:Traes_7DL_35C4D1A4C transcript:Traes_7DL_35C4D1A4C.1	41 kDa	0.93	0.025111	[]
TRAES3BF068000010CFD_t1	GTPase activator activity Source: GO_Central Rab GTPase binding	activation of GTPase activity Source: GO_Central intracellular protein transport Source: GO_Central regulation of vesicle fusion	Ortholog: Ypt/Rab-GAP domain of gyp1p superfamily protein; FUNCTIONS IN: RAB GTPase activator activity; INVOLVED IN: regulation of Rab GTPase activity	274 kDa	0.93	-0.0254703	[]
Traes_1AL_1543CA165.2		chloroplast organization Source: TAIR protein import into chloroplast stroma	Ortholog: Encodes a protein thought to be a part of the translocon at the chloroplast inner envelope. Involved in protein import into the chloroplast and chloroplast biogenesis. C-terminal half of Tic110 functions as scaffolds for protein-protein interactions	32 kDa	0.92	-0.0501234	[]
Traes_1DL_43FED2619.1	structural constituent of ribosome	cytoplasmic translation Source: GO_Central response to cold Source: TAIR translational elongation	60S acidic ribosomal protein P2	11 kDa	0.92	-0.221115	[]
Traes_2BS_80474BB5B.1	mRNA binding Source: TAIR translation initiation factor activity	regulation of translation Source: UniProtKB-KW response to abscisic acid Source: TAIR response to virus	pep:novel chromosome:IWGSC1.0+popseq:2B:193251482:193259803:1 gene:Traes_2BS_80474BB5B transcript:Traes_2BS_80474BB5B.1 description:"Eukaryotic translation initiation factor 4G "	203 kDa	0.92	0.228641	[]
Traes_3B_29F91AA70.1	L-phenylalanine:2-oxoglutarate aminotransferase activity Source: UniProtKB-EC L-tryptophan:2-oxoglutarate aminotransferase activity Source: UniProtKB-EC L-tyrosine:2-oxoglutarate aminotransferase activity Source: UniProtKB-EC methionine-oxo-acid transaminase activity Source: TAIR pyridoxal phosphate binding Source: InterPro transaminase activity	aromatic amino acid family metabolic process Source: UniProtKB auxin biosynthetic process Source: UniProtKB auxin homeostasis Source: UniProtKB ethylene biosynthetic process Source: UniProtKB-KW L-phenylalanine metabolic process Source: UniProtKB methionine metabolic process Source: UniProtKB negative regulation of ethylene biosynthetic process Source: TAIR negative regulation of indoleacetic aci…	pep:novel scaffold:IWGSC1.0+popseq:IWGSC_CSS_3B_scaff_10685454:2975:9188:1 gene:Traes_3B_29F91AA70 transcript:Traes_3B_29F91AA70.1	55 kDa	0.92	0.228642	[]
Traes_5DL_469B4E877.1	4-amino-4-deoxychorismate synthase activity Source: GO_Central isochorismate synthase activity	defense response Source: UniProtKB-KW phylloquinone biosynthetic process Source: TAIR salicylic acid biosynthetic process Source: UniProtKB-UniPathway tetrahydrofolate biosynthetic process	pep:known chromosome:IWGSC1.0+popseq:5D:49419246:49426032:-1 gene:Traes_5DL_469B4E877 transcript:Traes_5DL_469B4E877.1 description:"Mitochondrial outer membrane porin "	87 kDa	0.92	-0.0276038	[]
Traes_6BL_273879F2E.1		glycine decarboxylation via glycine cleavage system	pep:novel chromosome:IWGSC1.0+popseq:6B:154899352:154900869:1 gene:Traes_6BL_273879F2E transcript:Traes_6BL_273879F2E.1	17 kDa	0.92	0.212653	[]
Traes_6DL_5547C0638.1	quinate O-hydroxycinnamoyltransferase activity Source: TAIR shikimate O-hydroxycinnamoyltransferase activity	auxin homeostasis Source: TAIR cell wall organization Source: UniProtKB-KW lignin biosynthetic process Source: TAIR positive regulation of flavonoid biosynthetic process	pep:novel scaffold:IWGSC1.0+popseq:IWGSC_CSS_6DL_scaff_3216323:399:1539:-1 gene:Traes_6DL_5547C0638 transcript:Traes_6DL_5547C0638.1	30 kDa	0.92	-0.135625	[]
Traes_6DL_71DBEA7D1.1	hydrolase activity, hydrolyzing O-glycosyl compounds	carbohydrate metabolic process	pep:novel scaffold:IWGSC1.0+popseq:IWGSC_CSS_6DL_scaff_2816273:1:1964:1 gene:Traes_6DL_71DBEA7D1 transcript:Traes_6DL_71DBEA7D1.1	25 kDa	0.92	-0.218287	[]
Traes_7DL_98846F89F.1 (+1)	damaged DNA binding Source: GO_Central oxidized purine nucleobase lesion DNA N-glycosylase activity Source: GO_Central RNA binding Source: UniProtKB-KW structural constituent of ribosome	cytoplasmic translation Source: GO_Central DNA repair Source: GO_Central response to salt stress	pep:novel chromosome:IWGSC1.0+popseq:7D:136106099:136108021:-1 gene:Traes_7DL_98846F89F transcript:Traes_7DL_98846F89F.1	25 kDa	0.92	-0.031428	[]
TRAES3BF048900190CFD_t1 (+1)	threonine-type endopeptidase activity	response to zinc ion Source: TAIR ubiquitin-dependent protein catabolic process	pep:novel chromosome:IWGSC1.0+popseq:3B:515798407:515803841:1 gene:TRAES3BF048900190CFD_g transcript:TRAES3BF048900190CFD_t1	26 kDa	0.92	0.0215799	[]
TRAES3BF092100100CFD_t1	glycine dehydrogenase (decarboxylating) activity	glycine catabolic process Source: TAIR response to cadmium ion	Ortholog; glycine decarboxylase P-protein 1 (GLDP1); FUNCTIONS IN: glycine dehydrogenase (decarboxylating) activity, protein binding; INVOLVED IN: glycine catabolic process, response to cadmium ion, glycine decarboxylation via glycine cleavage system	111 kDa	0.92	0.0108419	[]
TRAES3BF135100050CFD_t1 (+1)	enzyme activator activity Source: TAIR oxidoreductase activity, acting on a sulfur group of donors, disulfide as acceptor Source: GO_Central protein disulfide oxidoreductase activity Source: GO_Central protein-disulfide reductase activity Source: GO_Central thioredoxin-disulfide reductase activity	cell redox homeostasis Source: GO_Central cellular response to oxidative stress Source: GO_Central glycerol ether metabolic process Source: InterPro positive regulation of catalytic activity	Ortholog: encodes a prokaryotic thioredoxin	8 kDa	0.92	-0.0201218	[]
Traes_1BS_D86496196.2	mRNA binding	mRNA processing Source: UniProtKB-KW mRNA transport Source: UniProtKB-KW nuclear-transcribed mRNA catabolic process, nonsense-mediated decay Source: GO_Central positive regulation of gene expression Source: TAIR regulation of alternative mRNA splicing, via spliceosome Source: GO_Central regulation of translation Source: UniProtKB-KW RNA splicing	pep:novel chromosome:IWGSC1.0+popseq:1B:102698879:102701053:1 gene:Traes_1BS_D86496196 transcript:Traes_1BS_D86496196.2	23 kDa	0.91	-0.0449984	[]
Traes_2AL_1B2CC9926.1 (+1)	structural constituent of ribosome	maturation of SSU-rRNA from tricistronic rRNA transcript (SSU-rRNA, 5.8S rRNA, LSU-rRNA) Source: GO_Central translation	pep:novel chromosome:IWGSC1.0+popseq:2A:40374889:40376831:-1 gene:Traes_2AL_1B2CC9926 transcript:Traes_2AL_1B2CC9926.1 description:"Ribosomal protein S8e family protein"	25 kDa	0.91	-0.0292334	[]
Traes_6AS_7FB8F9A66.1	catalase activity Source: TAIR cobalt ion binding Source: TAIR heme binding	cell death Source: TAIR cell redox homeostasis Source: TAIR cellular response to nitrogen starvation Source: TAIR cellular response to phosphate starvation Source: TAIR cellular response to sulfate starvation Source: TAIR hydrogen peroxide catabolic process Source: GO_Central photoperiodism Source: TAIR response to cold Source: TAIR response to hydrogen peroxide Source: GO_Central response to lig…	Ortholog: Encodes a peroxisomal catalase, highly expressed in bolts and leaves. mRNA expression patterns show circadian regulation with mRNA levels being high in the subjective early morning	57 kDa	0.91	-0.0223132	[]
Traes_7DL_D2014BC3D.1	?	?	pep:novel chromosome:IWGSC1.0+popseq:7D:206681193:206684064:1 gene:Traes_7DL_D2014BC3D transcript:Traes_7DL_D2014BC3D.1	43 kDa	0.91	-0.237336	[]
Traes_7DS_42F8FD2BD.1	metal ion binding Source: UniProtKB-KW transketolase activity	reductive pentose-phosphate cycle Source: UniProtKB-UniPathway response to cadmium ion Source: TAIR response to salt stress	pep:novel scaffold:IWGSC1.0+popseq:IWGSC_CSS_7DS_scaff_3876909:4220:6871:-1 gene:Traes_7DS_42F8FD2BD transcript:Traes_7DS_42F8FD2BD.1	64 kDa	0.91	-0.0163191	[]
Traes_2BS_B6E90913E.2	3-deoxy-7-phosphoheptulonate synthase activity	aromatic amino acid family biosynthetic process Source: UniProtKB-KW chorismate biosynthetic process	pep:novel chromosome:IWGSC1.0+popseq:2B:62944320:62946985:1 gene:Traes_2BS_B6E90913E transcript:Traes_2BS_B6E90913E.2	40 kDa	0.9	-0.138693	[]
Traes_2BS_C51A7FD9A.1	mRNA binding	mRNA processing Source: UniProtKB-KW RNA splicing	pep:novel chromosome:IWGSC1.0+popseq:2B:39131430:39135927:-1 gene:Traes_2BS_C51A7FD9A transcript:Traes_2BS_C51A7FD9A.1	39 kDa	0.9	-0.277631	[]
Traes_4BS_48D6F717D.1 (+1)	mRNA binding Source: TAIR structural constituent of ribosome	ribosomal large subunit assembly Source: GO_Central translation	pep:novel chromosome:IWGSC1.0+popseq:4B:153720791:153723308:1 gene:Traes_4BS_48D6F717D transcript:Traes_4BS_48D6F717D.1	45 kDa	0.9	-0.15105	[]
Traes_5AS_72FF67956.1	ATP binding Source: TAIR unfolded protein binding	protein folding Source: InterPro protein targeting to chloroplast Source: TAIR response to cadmium ion Source: TAIR response to cold Source: TAIR viral process	pep:novel scaffold:IWGSC1.0+popseq:IWGSC_CSS_5AS_scaff_1536430:1646:5039:-1 gene:Traes_5AS_72FF67956 transcript:Traes_5AS_72FF67956.1	40 kDa	0.9	0.0209182	[]
Traes_5DS_554AEC0FE.1	2-methyl-6-geranylgeranyl-1,4-benzoquinol methyltransferase activity Source: UniProtKB-EC 2-methyl-6-phytyl-1,4-benzoquinone methyltransferase activity Source: TAIR S-adenosylmethionine-dependent methyltransferase activity	plastoquinone biosynthetic process Source: TAIR vitamin E biosynthetic process	pep:novel chromosome:IWGSC1.0+popseq:5D:19118311:19120621:1 gene:Traes_5DS_554AEC0FE transcript:Traes_5DS_554AEC0FE.1	27 kDa	0.9	0.151508	[]
Traes_6AL_727AEFCD4.1	amino acid binding Source: InterPro ornithine carbamoyltransferase activity	arginine biosynthetic process via ornithine Source: GO_Central urea cycle	Ornithine carbamoyltransferase	40 kDa	0.9	-0.095093	[]
Traes_6AS_478618F75.1	rRNA binding Source: UniProtKB-KW structural constituent of ribosome	translation	Ribosomal protein L3 family protein	28 kDa	0.9	0.0548665	[]
TRAES3BF043700170CFD_t1	lipid binding	cell cycle Source: UniProtKB-KW cell division	Ortholog: Sec14p-like phosphatidylinositol transfer family protein; FUNCTIONS IN: transporter activity; INVOLVED IN: transport	63 kDa	0.9	0.262574	[]
EPlTAEP00000010026	4 iron, 4 sulfur cluster binding Source: UniProtKB-KW chlorophyll binding Source: UniProtKB-KW metal ion binding Source: UniProtKB-KW oxidoreductase activity Source: UniProtKB-KW	photosynthesis Source: TAIR protein-chromophore linkage Source: UniProtKB-KW	Photosystem I P700 chlorophyll a apoprotein A1	83 kDa	0.89	-0.119123	[]
Traes_2AL_9ECF957B9.2	histidinol dehydrogenase activity Source: TAIR NAD binding Source: InterPro zinc ion binding	histidine biosynthetic process Source: GO_Central pollen development Source: TAIR response to UV	pep:novel chromosome:IWGSC1.0+popseq:2A:91011286:91015008:1 gene:Traes_2AL_9ECF957B9 transcript:Traes_2AL_9ECF957B9.2 description:"histidinol dehydrogenase"	51 kDa	0.89	0.1564	[]
Traes_2AS_28CFE9EB7.2	transcription factor binding	long-day photoperiodism, flowering Source: UniProtKB regulation of timing of transition from vegetative to reproductive phase Source: UniProtKB vegetative to reproductive phase transition of meristem	pep:novel chromosome:IWGSC1.0+popseq:2A:179146159:179147823:1 gene:Traes_2AS_28CFE9EB7 transcript:Traes_2AS_28CFE9EB7.2 description:"Leucine-rich repeat (LRR) family protein"	36 kDa	0.89	0.310176	[]
Traes_2BL_E3222439E.1	cytochrome-c peroxidase activity Source: GO_Central heme binding	cellular response to oxidative stress Source: GO_Central hydrogen peroxide catabolic process Source: GO_Central response to reactive oxygen species	pep:novel chromosome:IWGSC1.0+popseq:2B:290549637:290551965:-1 gene:Traes_2BL_E3222439E transcript:Traes_2BL_E3222439E.1 description:"ascorbate peroxidase 4"	41 kDa	0.89	-0.109166	[]
Traes_2DL_7865F8015.2	?	?	Ortholog: Regulator of chromosome condensation (RCC1) family protein; CONTAINS InterPro DOMAIN/s: Regulator of chromosome condensation/beta-lactamase-inhibitor protein II	52 kDa	0.89	0.298032	[]
Traes_2DS_66A3A96F0.1	?	?	NAD(P)-binding Rossmann-fold superfamily protein	64 kDa	0.89	0.100521	[]
Traes_3DL_621E77DAE.1	selenium binding	cellular response to selenium ion Source: TAIR response to cadmium ion Source: TAIR response to hydrogen peroxide Source: TAIR sulfate assimilation	pep:novel chromosome:IWGSC1.0+popseq:3D:101681857:101685003:1 gene:Traes_3DL_621E77DAE transcript:Traes_3DL_621E77DAE.1	51 kDa	0.89	-0.311411	[]
Traes_5AL_F34D9C840.1	?	?	pep:novel scaffold:IWGSC1.0+popseq:IWGSC_CSS_5AL_scaff_2674370:142:2913:1 gene:Traes_5AL_F34D9C840 transcript:Traes_5AL_F34D9C840.1 description:"Tautomerase/MIF superfamily protein"	12 kDa	0.89	0.312187	[]
Traes_5BL_3892C17DC.1	cinnamyl-alcohol dehydrogenase activity Source: UniProtKB-EC sinapyl alcohol dehydrogenase activity Source: UniProtKB-EC zinc ion binding	lignin biosynthetic process	pep:novel chromosome:IWGSC1.0+popseq:5B:99016594:99018746:1 gene:Traes_5BL_3892C17DC transcript:Traes_5BL_3892C17DC.1	37 kDa	0.89	-0.238146	[]
Traes_5BL_69A0036EA.1	copper ion binding	defense response to bacterium	pep:novel scaffold:IWGSC1.0+popseq:IWGSC_CSS_5BL_scaff_10867929:4816:7569:-1 gene:Traes_5BL_69A0036EA transcript:Traes_5BL_69A0036EA.1	31 kDa	0.89	0.149704	[]
Traes_5DL_B78355FA0.1	hydrolase activity Source: UniProtKB-KW poly(U) RNA binding		pep:novel chromosome:IWGSC1.0+popseq:5D:109247410:109259955:-1 gene:Traes_5DL_B78355FA0 transcript:Traes_5DL_B78355FA0.1 description:"P-loop containing nucleoside triphosphate hydrolases superfamily protein"	229 kDa	0.89	0.312187	[]
Traes_6DL_6F7AB4147.1 (+1)	calcium-dependent phospholipid binding Source: UniProtKB-KW calcium ion binding	response to cold Source: TAIR response to heat Source: TAIR response to salt stress Source: TAIR response to water deprivation	pep:novel scaffold:IWGSC1.0+popseq:IWGSC_CSS_6DL_scaff_3264048:4959:6972:-1 gene:Traes_6DL_6F7AB4147 transcript:Traes_6DL_6F7AB4147.1	35 kDa	0.89	0.174737	[]
EPlTAEP00000010020 (+60)	RNA binding Source: UniProtKB rRNA binding Source: UniProtKB-KW single-stranded DNA binding Source: UniProtKB	negative regulation of response to salt stress Source: UniProtKB negative regulation of response to water deprivation Source: UniProtKB regulation of seed germination Source: UniProtKB regulation of seedling development Source: UniProtKB response to cold Source: UniProtKB response to salt stress Source: UniProtKB response to water deprivation Source: UniProtKB	pep:known chromosome:IWGSC1.0+popseq:Pt:80044:80259:-1 gene:EPlTAEG00000010020 transcript:EPlTAET00000010020 description:"30S ribosomal protein S19, chloroplastic "	8 kDa	0.88	-0.17714	[]
Traes_2AS_D26D32A7C.1 (+2)	protein domain specific binding	photosynthesis	Ortholog: Encodes the only subunit of photosystem I located entirely in the thylakoid lumen. May be involved in the interaction between plastocyanin and the photosystem I complex	15 kDa	0.88	0.026074	[]
Traes_2BL_2768AE3B1.1	aminomethyltransferase activity Source: UniProtKB-EC transaminase activity	glycine catabolic process	Ortholog: Glycine cleavage T-protein family; FUNCTIONS IN: aminomethyltransferase activity	39 kDa	0.88	0.0289513	[]
Traes_2BS_C3CF1817A.1	mRNA binding Source: TAIR RNA binding Source: GO_Central structural constituent of ribosome	cytoplasmic translation	pep:novel chromosome:IWGSC1.0+popseq:2B:32870592:32871918:1 gene:Traes_2BS_C3CF1817A transcript:Traes_2BS_C3CF1817A.1	14 kDa	0.88	-0.0716647	[]
Traes_3AS_E7AE13ECD.1	kinase activity		pep:novel scaffold:IWGSC1.0+popseq:IWGSC_CSS_3AS_scaff_3441149:934:3334:1 gene:Traes_3AS_E7AE13ECD transcript:Traes_3AS_E7AE13ECD.1	49 kDa	0.88	-0.322399	[]
Traes_4BL_E7D810D57.1	aspartic-type endopeptidase activity	protein catabolic process Source: GO_Central proteolysis	pep:novel chromosome:IWGSC1.0+popseq:4B:304034589:304036377:1 gene:Traes_4BL_E7D810D57 transcript:Traes_4BL_E7D810D57.1	49 kDa	0.88	-0.336517	[]
Traes_5BL_7EDE873F5.1	protein domain specific binding	photosynthesis	pep:novel chromosome:IWGSC1.0+popseq:5B:228335145:228336502:-1 gene:Traes_5BL_7EDE873F5 transcript:Traes_5BL_7EDE873F5.1 description:"photosystem I subunit F"	25 kDa	0.88	0.0385565	[]
EPlTAEP00000010048	chlorophyll binding Source: TAIR electron transporter, transferring electrons within the cyclic electron transport pathway of photosynthesis activity Source: InterPro metal ion binding Source: UniProtKB-KW	photosynthetic electron transport in photosystem II Source: InterPro protein-chromophore linkage Source: UniProtKB-KW response to herbicide Source: UniProtKB-KW	pep:novel chromosome:IWGSC1.0+popseq:Pt:36897:39101:-1 gene:EPlTAEG00000010048 transcript:EPlTAET00000010048 description:"Photosystem I P700 chlorophyll a apoprotein A2"	83 kDa	0.87	-0.037999	[]
Traes_1DL_C875BF063.1	hydrolase activity	response to salt stress	pep:novel scaffold:IWGSC1.0+popseq:IWGSC_CSS_1DL_scaff_2244937:2201:5079:-1 gene:Traes_1DL_C875BF063 transcript:Traes_1DL_C875BF063.1	26 kDa	0.87	0.186557	[]
Traes_2BL_7E386E5FA.1	chlorophyll binding Source: GO_Central pigment binding Source: GO_Central protein domain specific binding	nonphotochemical quenching Source: TAIR photosynthesis Source: TAIR photosynthesis, light harvesting in photosystem I Source: GO_Central protein-chromophore linkage	pep:novel scaffold:IWGSC1.0+popseq:IWGSC_CSS_2BL_scaff_8019292:1497:3074:1 gene:Traes_2BL_7E386E5FA transcript:Traes_2BL_7E386E5FA.1	35 kDa	0.87	0.0430957	[]
Traes_2DL_AA319AB9D.1	isocitrate dehydrogenase (NAD+) activity Source: TAIR metal ion binding	isocitrate metabolic process Source: TAIR tricarboxylic acid cycle	Ortholog: Encodes a regulatory subunit of the mitochondrially-localized NAD+- dependent isocitrate dehydrogenase	33 kDa	0.87	0.184255	[]
Traes_4DL_D2423513A.1	copper ion binding Source: TAIR L,L-diaminopimelate aminotransferase activity Source: TAIR pyridoxal phosphate binding Source: InterPro transaminase activity	lysine biosynthetic process via diaminopimelate Source: UniProtKB-UniPathway response to cytokinin Source: TAIR systemic acquired resistance, salicylic acid mediated signaling pathway	pep:novel scaffold:IWGSC1.0+popseq:IWGSC_CSS_4DL_scaff_14371621:4268:7867:-1 gene:Traes_4DL_D2423513A transcript:Traes_4DL_D2423513A.1	50 kDa	0.87	-0.0572642	[]
Traes_5AL_1DD952467.1 (+1)	ATP binding Source: TAIR cobalt ion binding Source: TAIR copper ion binding Source: TAIR glutamate dehydrogenase [NAD(P)+] activity Source: TAIR zinc ion binding	cellular amino acid metabolic process Source: InterPro nitrogen compound metabolic process Source: TAIR response to absence of light Source: TAIR response to cadmium ion Source: TAIR response to salt stress	Ortholog: Encodes the 43 kDa alpha-subunit of the glutamate dehydrogenase with a putative mitochondrial transit polypeptide and NAD(H)- and alpha-ketoglutarate-binding domains	42 kDa	0.87	0.27652	[]
Traes_6AL_562AE8B6E.1	dihydropyrimidine dehydrogenase (NADP+) activity	beta-alanine biosynthetic process Source: UniProtKB-UniPathway cellular response to nitrogen levels Source: TAIR uracil catabolic process	pep:novel chromosome:IWGSC1.0+popseq:6A:183257172:183262236:1 gene:Traes_6AL_562AE8B6E transcript:Traes_6AL_562AE8B6E.1 description:"pyrimidine 1"	45 kDa	0.87	0.18084	[]
Traes_6DS_08F52DEBD.1	cobalt ion binding Source: TAIR copper ion binding Source: TAIR zinc ion binding	pollen development Source: TAIR proton transport	pep:novel chromosome:IWGSC1.0+popseq:6D:15781576:15785528:-1 gene:Traes_6DS_08F52DEBD transcript:Traes_6DS_08F52DEBD.1 description:"copper ion binding\x3bcobalt ion binding\x3bzinc ion binding"	27 kDa	0.87	0.0598534	[]
Traes_1AL_1B8FDA3D4.1 (+1)	glutathione transferase activity	glutathione metabolic process Source: GO_Central response to oxidative stress Source: TAIR toxin catabolic process	Ortholog: Encodes glutathione transferase belonging to the phi class of GSTs	29 kDa	0.86	-0.109474	[]
Traes_2BL_F22336B90.2	protochlorophyllide reductase activity	chlorophyll biosynthetic process Source: UniProtKB-UniPathway photomorphogenesis Source: UniProtKB photosynthesis Source: UniProtKB-KW response to ethylene Source: TAIR skotomorphogenesis	Protochlorophyllide reductase A, chloroplastic	52 kDa	0.86	-0.381761	[]
Traes_3AL_6771AB197.2	2,3-bisphosphoglycerate-independent phosphoglycerate mutase activity Source: TAIR manganese ion binding	glucose catabolic process Source: InterPro glycolytic process Source: UniProtKB-UniPathway pollen development Source: TAIR response to cadmium ion Source: TAIR stomatal movement	pep:novel chromosome:IWGSC1.0+popseq:3A:146321658:146325263:1 gene:Traes_3AL_6771AB197 transcript:Traes_3AL_6771AB197.2	56 kDa	0.86	-0.0394636	[]
Traes_4AL_BE1AD302B.1	rRNA binding Source: UniProtKB-KW structural constituent of ribosome	adaxial/abaxial pattern specification Source: TAIR chloroplast rRNA processing Source: TAIR plastid translation Source: TAIR response to cadmium ion Source: TAIR response to cold	pep:novel chromosome:IWGSC1.0+popseq:4A:164980241:164986247:-1 gene:Traes_4AL_BE1AD302B transcript:Traes_4AL_BE1AD302B.1 description:"Ribosomal protein S5 family protein"	35 kDa	0.86	-0.0781342	[]
Traes_4BS_9F3A928B7.1	mRNA binding	alternative mRNA splicing, via spliceosome Source: TAIR innate immune response Source: TAIR response to abscisic acid Source: TAIR response to cold Source: UniProtKB response to cytokinin Source: TAIR response to salt stress Source: TAIR response to zinc ion	pep:novel chromosome:IWGSC1.0+popseq:4B:6711410:6711994:-1 gene:Traes_4BS_9F3A928B7 transcript:Traes_4BS_9F3A928B7.1	7 kDa	0.86	0.0400764	[]
Traes_5BS_017F8702A.1	fructose-bisphosphate aldolase activity	gluconeogenesis Source: UniProtKB glycolytic process Source: UniProtKB response to abscisic acid Source: TAIR response to cadmium ion	Ortholog: Protein is tyrosine-phosphorylated and its phosphorylation state is modulated in response to ABA in Arabidopsis thaliana seeds	42 kDa	0.86	-0.0293048	[]
Traes_5DL_1299E23A4.1	RNA binding Source: GO_Central structural constituent of ribosome	maturation of LSU-rRNA Source: GO_Central translation	Ortholog: Ribosomal protein L7Ae/L30e/S12e/Gadd45 family protein; FUNCTIONS IN: structural constituent of ribosome; INVOLVED IN: translation	30 kDa	0.86	0.206318	[]
Traes_5DL_5568ADA8C.1	ubiquitin protein ligase activity Source: GO_Central ubiquitin protein ligase binding	postreplication repair Source: TAIR protein K63-linked ubiquitination	pep:novel chromosome:IWGSC1.0+popseq:5D:67598862:67602107:-1 gene:Traes_5DL_5568ADA8C transcript:Traes_5DL_5568ADA8C.1	17 kDa	0.86	0.400455	[]
Traes_6AL_38E8DCF06.1	heme binding Source: InterPro metal ion binding Source: UniProtKB-KW peroxidase activity	hydrogen peroxide catabolic process Source: UniProtKB-KW plant-type cell wall organization Source: GO_Central response to oxidative stress	pep:novel scaffold:IWGSC1.0+popseq:IWGSC_CSS_6AL_scaff_5806439:712:4558:1 gene:Traes_6AL_38E8DCF06 transcript:Traes_6AL_38E8DCF06.1	36 kDa	0.86	0.393178	[]
Traes_6AL_BD395873C.2	NADH dehydrogenase activity	response to salt stress Source: TAIR ubiquinone-6 biosynthetic process	pep:novel scaffold:IWGSC1.0+popseq:IWGSC_CSS_6AL_scaff_5833640:4776:8653:-1 gene:Traes_6AL_BD395873C transcript:Traes_6AL_BD395873C.2 description:"NAD(P)-binding Rossmann-fold superfamily protein"	45 kDa	0.86	0.0361194	[]
Traes_6AS_539B381F1.2	DNA binding Source: UniProtKB-KW mRNA binding Source: TAIR zinc ion binding	embryo development ending in seed dormancy Source: TAIR fruit development Source: TAIR regulation of transcription, DNA-templated Source: InterPro response to cold	pep:novel scaffold:IWGSC1.0+popseq:IWGSC_CSS_6AS_scaff_4367258:5190:5966:1 gene:Traes_6AS_539B381F1 transcript:Traes_6AS_539B381F1.2	28 kDa	0.86	-0.0963675	[]
Traes_6DL_A19C3ABDA.1	proton-transporting ATP synthase activity, rotational mechanism	ATP synthesis coupled proton transport Source: InterPro defense response to bacterium Source: TAIR photosynthesis Source: TAIR photosynthetic electron transport in photosystem I Source: TAIR photosynthetic electron transport in photosystem II Source: TAIR response to cold Source: TAIR response to cytokinin	pep:novel chromosome:IWGSC1.0+popseq:6D:41603840:41604385:1 gene:Traes_6DL_A19C3ABDA transcript:Traes_6DL_A19C3ABDA.1 description:"ATP synthase delta-subunit gene"	18 kDa	0.86	0.0397313	[]
Traes_1AL_3F7734C6B.1	aspartate-prephenate aminotransferase activity Source: UniProtKB glutamate-prephenate aminotransferase activity Source: UniProtKB L-aspartate:2-oxoglutarate aminotransferase activity Source: UniProtKB L-phenylalanine:2-oxoglutarate aminotransferase activity Source: UniProtKB-EC pyridoxal phosphate binding	aromatic amino acid family biosynthetic process, prephenate pathway Source: UniProtKB embryo development ending in seed dormancy Source: TAIR L-phenylalanine biosynthetic process	pep:novel scaffold:IWGSC1.0+popseq:IWGSC_CSS_1AL_scaff_3959638:3140:7339:-1 gene:Traes_1AL_3F7734C6B transcript:Traes_1AL_3F7734C6B.1 description:"aspartate aminotransferase"	49 kDa	0.85	0.214371	[]
Traes_1AL_BB3D071F8.1	protein domain specific binding Source: CAFA protochlorophyllide reductase activity	chlorophyll biosynthetic process Source: UniProtKB-UniPathway photosynthesis Source: UniProtKB-KW response to ethylene	Ortholog: light-dependent NADPH:protochlorophyllide oxidoreductase B	42 kDa	0.85	-0.0754404	[]
Traes_1AS_081481D35.1		plant-type secondary cell wall biogenesis	pep:novel chromosome:IWGSC1.0+popseq:1A:124602016:124603311:1 gene:Traes_1AS_081481D35 transcript:Traes_1AS_081481D35.1	27 kDa	0.85	0.0555452	[]
Traes_1AS_F4697DFFA.1 (+1)	dicarboxylic acid transmembrane transporter activity Source: TAIR oxoglutarate:malate antiporter activity Source: GO_Central tricarboxylic acid transmembrane transporter activity	dicarboxylic acid transport Source: TAIR mitochondrial transport Source: GO_Central tricarboxylic acid transmembrane transport	pep:novel chromosome:IWGSC1.0+popseq:1A:149400804:149404683:1 gene:Traes_1AS_F4697DFFA transcript:Traes_1AS_F4697DFFA.1	32 kDa	0.85	0.0514667	[]
Traes_1BS_20DB6A3F2.2	ATP binding		Ortholog: Heat shock protein 70 (Hsp 70) family protein; FUNCTIONS IN: ATP binding; LOCATED IN: cell wall, plasma membrane	94 kDa	0.85	-0.068825	[]
Traes_1DS_B2954347C.1	copper ion binding Source: TAIR nutrient reservoir activity Source: InterPro zinc ion binding		pep:novel chromosome:IWGSC1.0+popseq:1D:11404587:11407309:1 gene:Traes_1DS_B2954347C transcript:Traes_1DS_B2954347C.1	38 kDa	0.85	0.0794579	[]
Traes_2AS_8558C34D7.1	electron transfer activity		pep:novel chromosome:IWGSC1.0+popseq:2A:168419543:168424268:1 gene:Traes_2AS_8558C34D7 transcript:Traes_2AS_8558C34D7.1	13 kDa	0.85	-0.405924	[]
Traes_2BL_5D64E8C87.1	glyceraldehyde-3-phosphate dehydrogenase (NADP+) (phosphorylating) activity Source: UniProtKB-EC NAD binding Source: InterPro NADP binding	glucose metabolic process Source: InterPro reductive pentose-phosphate cycle	Ortholog: glyceraldehyde 3-phosphate dehydrogenase A subunit 2 (GAPA-2); FUNCTIONS IN: NAD or NADH binding, glyceraldehyde-3-phosphate dehydrogenase activity; INVOLVED IN: oxidation reduction, glycolysis, glucose metabolic process	43 kDa	0.85	-0.0318401	[]
Traes_2BS_F47964983.1	carbonate dehydratase activity Source: TAIR metal ion binding	photorespiration Source: TAIR protein homotrimerization	Gamma carbonic anhydrase 2	30 kDa	0.85	-0.171302	[]
Traes_2DS_C6B631387.1	translation elongation factor activity	defense response to bacterium	Elongation factor 1-beta	23 kDa	0.85	0.0662946	[]
Traes_5BL_8A99D83A5.1	L-malate dehydrogenase activity	glyoxylate cycle Source: UniProtKB-KW malate metabolic process Source: InterPro regulation of fatty acid beta-oxidation Source: UniProtKB regulation of photorespiration Source: UniProtKB tricarboxylic acid cycle	encodes a microbody NAD-dependent malate Ortholog: dehydrogenase encodes an peroxisomal NAD-malate dehydrogenase that is involved in fatty acid beta-oxidation through providing NAD to the process of converting fatty acyl CoA to acetyl CoA	38 kDa	0.85	-0.0390981	[]
Traes_6DL_C8292F26F.2		glycine decarboxylation via glycine cleavage system	pep:novel chromosome:IWGSC1.0+popseq:6D:146463399:146464948:1 gene:Traes_6DL_C8292F26F transcript:Traes_6DL_C8292F26F.2	17 kDa	0.85	0.0341994	[]
Traes_7AS_81327ECA0.1 (+1)	cytochrome-c peroxidase activity Source: GO_Central heme binding Source: InterPro L-ascorbate peroxidase activity Source: TAIR metal ion binding	cellular response to oxidative stress Source: GO_Central hydrogen peroxide catabolic process Source: GO_Central response to cytokinin Source: TAIR response to oxidative stress Source: TAIR response to reactive oxygen species	Ortholog: Encodes a microsomal ascorbate peroxidase APX3. Ascorbate peroxidases are enzymes that scavenge hydrogen peroxide in plant cells	28 kDa	0.85	0.0725336	[]
TRAES3BF039400020CFD_t1 (+3)	actin filament binding	actin filament bundle assembly Source: UniProtKB actin filament capping	Ortholog: Encodes a protein with high homology to animal villin	108 kDa	0.85	0.0446276	[]
Traes_1AL_7402A5761.1		multicellular organism development Source: UniProtKB-KW plant-type cell wall cellulose biosynthetic process Source: TAIR protein localization to cortical microtubule cytoskeleton Source: UniProtKB regulation of cell shape Source: UniProtKB-KW regulation of growth Source: UniProtKB-KW unidimensional cell growth	pep:novel scaffold:IWGSC1.0+popseq:IWGSC_CSS_1AL_scaff_3905642:1:874:1 gene:Traes_1AL_7402A5761 transcript:Traes_1AL_7402A5761.1	23 kDa	0.84	0.449268	[]
Traes_1AL_F3452F0E7.2	phosphogluconate 2-dehydrogenase activity Source: TAIR phosphogluconate dehydrogenase (decarboxylating) activity	D-gluconate metabolic process Source: UniProtKB-KW pentose-phosphate shunt, oxidative branch Source: TAIR response to cadmium ion Source: TAIR response to fructose Source: TAIR response to glucose Source: TAIR response to sucrose	pep:novel chromosome:IWGSC1.0+popseq:1A:197635341:197638293:1 gene:Traes_1AL_F3452F0E7 transcript:Traes_1AL_F3452F0E7.2	35 kDa	0.84	0.449268	[]
Traes_2AL_3C99F42A5.1		response to abscisic acid	pep:novel chromosome:IWGSC1.0+popseq:2A:233734769:233740022:-1 gene:Traes_2AL_3C99F42A5 transcript:Traes_2AL_3C99F42A5.1	94 kDa	0.84	-0.183611	[]
Traes_2BL_A6E213603.1 (+3)	ATP binding Source: UniProtKB-KW protease binding	defense response to bacterium Source: UniProtKB defense response to fungus Source: UniProtKB defense response to other organism Source: TAIR negative regulation of seed germination Source: TAIR regulation of transcription, DNA-templated Source: UniProtKB-KW response to cadmium ion Source: TAIR response to cold Source: TAIR response to heat Source: UniProtKB response to virus Source: TAIR stomatal…	pep:novel chromosome:IWGSC1.0+popseq:2B:103873519:103877740:-1 gene:Traes_2BL_A6E213603 transcript:Traes_2BL_A6E213603.1	71 kDa	0.84	0.0226727	[]
Traes_3AL_45EF63187.1	ATP binding Source: UniProtKB-KW proline-tRNA ligase activity	prolyl-tRNA aminoacylation	Ortholog: Class II aaRS and biotin synthetases superfamily protein; FUNCTIONS IN: proline-tRNA ligase activity, aminoacyl-tRNA ligase activity, nucleotide binding, ATP binding; INVOLVED IN: prolyl-tRNA aminoacylation, translation, tRNA aminoacylation for protein translation	58 kDa	0.84	0.43972	[]
Traes_3AS_6850784D1.1	metalloendopeptidase activity Source: GO_Central oxidoreductase activity Source: UniProtKB-KW zinc ion binding	protein processing involved in protein targeting to mitochondrion	pep:novel chromosome:IWGSC1.0+popseq:3A:24166304:24170335:1 gene:Traes_3AS_6850784D1 transcript:Traes_3AS_6850784D1.1	54 kDa	0.84	0.059067	[]
Traes_4AL_2EC6083D7.2	translation elongation factor activity		pep:novel chromosome:IWGSC1.0+popseq:4A:40674012:40678786:1 gene:Traes_4AL_2EC6083D7 transcript:Traes_4AL_2EC6083D7.2 description:"elongation factor P (EF-P) family protein"	26 kDa	0.84	-0.330859	[]
Traes_4AS_9ECDC8629.1	O-phospho-L-serine:2-oxoglutarate aminotransferase activity	L-serine biosynthetic process Source: TAIR response to cytokinin	pep:novel chromosome:IWGSC1.0+popseq:4A:493228:494820:1 gene:Traes_4AS_9ECDC8629 transcript:Traes_4AS_9ECDC8629.1	30 kDa	0.84	0.446483	[]
Traes_4BS_A435E6D76.2	glycine hydroxymethyltransferase activity Source: UniProtKB poly(U) RNA binding Source: TAIR pyridoxal phosphate binding	circadian rhythm Source: UniProtKB glycine biosynthetic process from serine Source: InterPro glycine metabolic process Source: UniProtKB L-serine metabolic process Source: UniProtKB photorespiration Source: UniProtKB plant-type hypersensitive response Source: TAIR response to cadmium ion Source: TAIR response to cold Source: TAIR response to light stimulus Source: UniProtKB tetrahydrofolate inter…	Serine transhydroxymethyltransferase 1	59 kDa	0.84	-0.0404062	[]
Traes_5BL_10BF821D1.2	adenyl-nucleotide exchange factor activity Source: GO_Central ATP binding Source: UniProtKB chaperone binding Source: InterPro copper ion binding Source: TAIR protein homodimerization activity Source: InterPro unfolded protein binding	heat acclimation Source: UniProtKB protein folding Source: InterPro protein import into mitochondrial matrix Source: GO_Central response to heat	pep:novel chromosome:IWGSC1.0+popseq:5B:116477757:116482499:1 gene:Traes_5BL_10BF821D1 transcript:Traes_5BL_10BF821D1.2	33 kDa	0.84	-0.0794453	[]
Traes_5BL_17F1F28B6.1	?	?	Aluminium induced protein with YGL and LRDR motifs	25 kDa	0.84	-0.171115	[]
Traes_5BL_7D5EC9052.1	beta-glucosidase activity	glucan catabolic process Source: GO_Central xyloglucan biosynthetic process	pep:novel chromosome:IWGSC1.0+popseq:5B:222566749:222572473:-1 gene:Traes_5BL_7D5EC9052 transcript:Traes_5BL_7D5EC9052.1	67 kDa	0.84	0.0343079	[]
Traes_5BS_1012AD486.1	adenine phosphoribosyltransferase activity	adenine salvage Source: TAIR circadian rhythm Source: TAIR cytokinin metabolic process Source: TAIR nucleoside metabolic process Source: InterPro response to cadmium ion	pep:known chromosome:IWGSC1.0+popseq:5B:23189178:23195408:1 gene:Traes_5BS_1012AD486 transcript:Traes_5BS_1012AD486.1 description:"Adenine phosphoribosyltransferase 1 "	25 kDa	0.84	-0.328053	[]
Traes_6DL_1CCB8CC4B.1 (+1)		photosystem II oxygen evolving complex assembly Source: TAIR response to cytokinin	pep:novel chromosome:IWGSC1.0+popseq:6D:170108822:170109650:-1 gene:Traes_6DL_1CCB8CC4B transcript:Traes_6DL_1CCB8CC4B.1	15 kDa	0.84	0.0435642	[]
TRAES3BF016200170CFD_t1 (+2)	mRNA binding	abscisic acid-activated signaling pathway Source: UniProtKB-KW cellular response to osmotic stress Source: TAIR cellular response to salt stress Source: TAIR regulation of abscisic acid-activated signaling pathway Source: UniProtKB response to abscisic acid Source: UniProtKB response to osmotic stress Source: UniProtKB response to salt stress	pep:novel chromosome:IWGSC1.0+popseq:3B:512768013:512770991:1 gene:TRAES3BF016200170CFD_g transcript:TRAES3BF016200170CFD_t1	40 kDa	0.84	0.43972	[]
EPlTAEP00000010015	chlorophyll binding, electron transporter	photosynthetic electron transport in photosystem II, protein-chromophore linkage	Photosystem II CP47 reaction center protein	56 kDa	0.83	0.063176	[]
Traes_1AL_F1BBE97D5.1	phosphogluconate 2-dehydrogenase activity Source: TAIR phosphogluconate dehydrogenase (decarboxylating) activity	D-gluconate metabolic process Source: UniProtKB-KW pentose-phosphate shunt, oxidative branch Source: TAIR response to cadmium ion Source: TAIR response to fructose Source: TAIR response to glucose Source: TAIR response to sucrose	pep:novel chromosome:IWGSC1.0+popseq:1A:233375576:233377261:-1 gene:Traes_1AL_F1BBE97D5 transcript:Traes_1AL_F1BBE97D5.1	30 kDa	0.83	-0.377722	[]
Traes_2AL_80D15B4FB.1 (+1)	ATP binding Source: UniProtKB-KW proteasome-activating ATPase activity Source: GO_Central TBP-class protein binding	positive regulation of RNA polymerase II transcriptional preinitiation complex assembly Source: GO_Central ubiquitin-dependent ERAD pathway	Ortholog: 26S proteasome AAA-ATPase subunit RPT3 (RPT3) mRNA	46 kDa	0.83	-0.481308	[]
Traes_5BS_5C3BA5328.1	oxygen-dependent protoporphyrinogen oxidase activity	chlorophyll biosynthetic process Source: UniProtKB-UniPathway porphyrin-containing compound biosynthetic process Source: TAIR protoporphyrinogen IX biosynthetic process	pep:novel chromosome:IWGSC1.0+popseq:5B:32665626:32669432:-1 gene:Traes_5BS_5C3BA5328 transcript:Traes_5BS_5C3BA5328.1 description:"Flavin containing amine oxidoreductase family"	56 kDa	0.83	-0.46718	[]
Traes_7AS_779E8A5D2.1	RNA binding	response to cytokinin	pep:novel chromosome:IWGSC1.0+popseq:7A:6706819:6710381:1 gene:Traes_7AS_779E8A5D2 transcript:Traes_7AS_779E8A5D2.1	23 kDa	0.83	-0.481308	[]
Traes_7AS_CD0F6A05B.1	ATPase activator activity Source: InterPro chaperone binding	response to stress	pep:novel scaffold:IWGSC1.0+popseq:IWGSC_CSS_7AS_scaff_4207900:1:1871:1 gene:Traes_7AS_CD0F6A05B transcript:Traes_7AS_CD0F6A05B.1	20 kDa	0.83	-0.481308	[]
Traes_7DL_79127DD28.1	GTPase activity Source: InterPro GTP binding	cell wall biogenesis Source: TAIR protein transport	pep:novel chromosome:IWGSC1.0+popseq:7D:177950066:177953347:1 gene:Traes_7DL_79127DD28 transcript:Traes_7DL_79127DD28.1	32 kDa	0.83	-0.46718	[]
Traes_7DL_ADFCB28B3.1	glyceraldehyde-3-phosphate dehydrogenase (NAD+) (phosphorylating) activity Source: TAIR NAD binding Source: InterPro NADP binding	amino acid homeostasis Source: TAIR carbohydrate metabolic process Source: TAIR glucose metabolic process Source: InterPro glycolytic process Source: UniProtKB-KW primary root development	pep:novel chromosome:IWGSC1.0+popseq:7D:215623126:215628757:1 gene:Traes_7DL_ADFCB28B3 transcript:Traes_7DL_ADFCB28B3.1	43 kDa	0.83	0.259114	[]
Traes_7DS_D417E8FEF.1	centromeric DNA binding Source: GO_Central nucleosomal DNA binding Source: GO_Central protein heterodimerization activity	kinetochore assembly Source: GO_Central mitotic sister chromatid segregation Source: GO_Central nucleosome assembly	pep:novel scaffold:IWGSC1.0+popseq:IWGSC_CSS_7DS_scaff_3893329:3657:4601:1 gene:Traes_7DS_D417E8FEF transcript:Traes_7DS_D417E8FEF.1	20 kDa	0.83	-0.485922	[]
TRAES3BF059300030CFD_t1 (+1)	ATP binding Source: UniProtKB-KW ATP citrate synthase activity Source: TAIR metal ion binding	acetyl-CoA biosynthetic process Source: TAIR lipid metabolic process	Ortholog: One of the two genes encoding subunit B of the cytosolic enzyme ATP Citrate Lyase (ACL)	66 kDa	0.83	0.0487125	[]
TRAES3BF087800010CFD_t1	copper ion binding Source: TAIR L-malate dehydrogenase activity	carbohydrate metabolic process Source: InterPro defense response to bacterium Source: TAIR malate metabolic process Source: InterPro response to cadmium ion Source: TAIR response to cold Source: TAIR response to salt stress Source: TAIR tricarboxylic acid cycle	pep:novel chromosome:IWGSC1.0+popseq:3B:427986592:427990732:1 gene:TRAES3BF087800010CFD_g transcript:TRAES3BF087800010CFD_t1	35 kDa	0.83	0.0355635	[]
Traes_1DL_DAE45B4D7.1		chloroplast organization Source: TAIR protein import into chloroplast stroma	Ortholog: Encodes a protein thought to be a part of the translocon at the chloroplast inner envelope. Involved in protein import into the chloroplast and chloroplast biogenesis. C-terminal half of Tic110 functions as scaffolds for protein-protein interactions	88 kDa	0.82	0.0833344	[]
Traes_2AS_DF84A8FC7.1		flower development Source: UniProtKB-KW mRNA processing Source: UniProtKB-KW regulation of transcription, DNA-templated Source: UniProtKB-KW transcription, DNA-templated	pep:novel chromosome:IWGSC1.0+popseq:2A:194894399:194902563:1 gene:Traes_2AS_DF84A8FC7 transcript:Traes_2AS_DF84A8FC7.1	101 kDa	0.82	-0.499045	[]
Traes_2BL_2D067BFBA.1	glyoxalase III activity Source: TAIR lactoylglutathione lyase activity		pep:novel chromosome:IWGSC1.0+popseq:2B:332673846:332677465:-1 gene:Traes_2BL_2D067BFBA transcript:Traes_2BL_2D067BFBA.1 description:"Class I glutamine amidotransferase-like superfamily protein"	47 kDa	0.82	0.518685	[]
Traes_2BS_D4E86AAA6.1	metal ion binding Source: UniProtKB-KW xylose isomerase activity	D-xylose metabolic process Source: UniProtKB-KW pentose-phosphate shunt	Xylose isomerase family protein	54 kDa	0.82	0.0718743	[]
Traes_3DL_F5AAA74C3.1	3 iron, 4 sulfur cluster binding Source: UniProtKB-KW flavin adenine dinucleotide binding Source: InterPro FMN binding Source: InterPro glutamate synthase (NADH) activity Source: TAIR iron ion binding	ammonia assimilation cycle Source: UniProtKB developmental growth Source: UniProtKB glutamate biosynthetic process Source: TAIR L-glutamate biosynthetic process Source: UniProtKB-UniPathway response to cadmium ion Source: TAIR response to cytokinin	pep:novel chromosome:IWGSC1.0+popseq:3D:32376157:32386100:-1 gene:Traes_3DL_F5AAA74C3 transcript:Traes_3DL_F5AAA74C3.1 description:"NADH-dependent glutamate synthase 1"	222 kDa	0.82	0.235696	[]
Traes_4AS_C2B77F64F.2	alanine-glyoxylate transaminase activity Source: UniProtKB-EC identical protein binding Source: GO_Central pyridoxal phosphate binding Source: GO_Central zinc ion binding	photorespiration Source: UniProtKB-KW response to cadmium ion	pep:novel scaffold:IWGSC1.0+popseq:IWGSC_CSS_4AS_scaff_6005818:19410:22866:1 gene:Traes_4AS_C2B77F64F transcript:Traes_4AS_C2B77F64F.2 description:"alanine\x3aglyoxylate aminotransferase 2"	52 kDa	0.82	-0.499045	[]
Traes_5AS_908BF5D38.1	3-dehydroquinate dehydratase activity Source: UniProtKB-EC NADP binding Source: InterPro shikimate 3-dehydrogenase (NADP+) activity	aromatic amino acid family biosynthetic process Source: UniProtKB-KW chorismate biosynthetic process Source: GO_Central embryo development ending in seed dormancy Source: TAIR shikimate metabolic process	Ortholog: Encodes a bi-functional dehydroquinate-shikimate dehydrogenase enzyme that catalyzes two steps in the chorismate biosynthesis pathway	48 kDa	0.82	0.253591	[]
Traes_5BL_62DAFEE8E.1 (+1)	translation initiation factor activity Source: TAIR translation initiation factor binding	formation of translation preinitiation complex Source: UniProtKB-UniRule regulation of translational initiation	Ortholog: member of eIF3b - eukaryotic initiation factor 3b	60 kDa	0.82	0.500948	[]
Traes_5BL_8FD1FB0E1.1 (+1)	mRNA binding Source: GO_Central structural constituent of ribosome	translation	pep:novel chromosome:IWGSC1.0+popseq:5B:221439987:221443004:1 gene:Traes_5BL_8FD1FB0E1 transcript:Traes_5BL_8FD1FB0E1.1	24 kDa	0.82	0.432656	[]
Traes_6DS_C972C6A71.2	3-hydroxyacyl-CoA dehydrogenase activity Source: UniProtKB 3-hydroxybutyryl-CoA epimerase activity Source: UniProtKB-EC dodecenoyl-CoA delta-isomerase activity Source: UniProtKB-EC enoyl-CoA hydratase activity	fatty acid beta-oxidation Source: TAIR flower development Source: TAIR jasmonic acid biosynthetic process	pep:novel chromosome:IWGSC1.0+popseq:6D:21922037:21930660:1 gene:Traes_6DS_C972C6A71 transcript:Traes_6DS_C972C6A71.2	70 kDa	0.82	0.432656	[]
Traes_7AS_F9453680B.1	?	?	pep:novel chromosome:IWGSC1.0+popseq:7A:46672734:46674441:1 gene:Traes_7AS_F9453680B transcript:Traes_7AS_F9453680B.1	19 kDa	0.82	0.518685	[]
Traes_7DL_3632B8F7B.1	ATPase activity Source: UniProtKB ATP binding Source: UniProtKB-KW unfolded protein binding	protein folding Source: InterPro protein secretion Source: TAIR regulation of meristem growth Source: TAIR regulation of meristem structural organization Source: TAIR response to cadmium ion Source: TAIR response to cold Source: TAIR response to endoplasmic reticulum stress Source: UniProtKB response to salt stress Source: TAIR response to water deprivation	pep:novel scaffold:IWGSC1.0+popseq:IWGSC_CSS_7DL_scaff_3393461:3415:10618:1 gene:Traes_7DL_3632B8F7B transcript:Traes_7DL_3632B8F7B.1 description:"Chaperone protein htpG family protein"	72 kDa	0.82	-0.246851	[]
TRAES3BF044200210CFD_t1	chlorophyll binding Source: TAIR protein domain specific binding Source: CAFA xanthophyll binding	nonphotochemical quenching Source: TAIR photosynthesis Source: UniProtKB-KW response to karrikin Source: TAIR thylakoid membrane organization Source: TAIR transmembrane transport	pep:novel chromosome:IWGSC1.0+popseq:3B:631651011:631653178:1 gene:TRAES3BF044200210CFD_g transcript:TRAES3BF044200210CFD_t1 description:"Chlorophyll A-B binding family protein"	28 kDa	0.82	0.0835068	[]
TRAES3BF045700010CFD_t1	ATP binding Source: UniProtKB-KW proteasome-activating ATPase activity Source: GO_Central TBP-class protein binding	embryo sac development Source: TAIR pollen development Source: TAIR positive regulation of RNA polymerase II transcriptional preinitiation complex assembly Source: GO_Central proteasomal protein catabolic process Source: TAIR ubiquitin-dependent ERAD pathway	pep:novel chromosome:IWGSC1.0+popseq:3B:672607310:672614465:1 gene:TRAES3BF045700010CFD_g transcript:TRAES3BF045700010CFD_t1	48 kDa	0.82	0.207527	[]
Traes_1AL_E8C262A2A.2	GTPase activity Source: InterPro GTP binding Source: UniProtKB-KW structural constituent of cytoskeleton	microtubule-based process Source: TAIR response to cold Source: TAIR response to salt stress	Tubulin beta-5 chain	50 kDa	0.81	-0.0587548	[]
Traes_2AS_007D8F7BD.1	cytochrome-c peroxidase activity Source: GO_Central heme binding Source: InterPro L-ascorbate peroxidase activity Source: TAIR metal ion binding	cellular response to oxidative stress Source: GO_Central embryo development ending in seed dormancy Source: TAIR hydrogen peroxide catabolic process Source: TAIR response to cadmium ion Source: TAIR response to cytokinin Source: TAIR response to heat Source: TAIR response to reactive oxygen species Source: TAIR response to salt stress	pep:novel chromosome:IWGSC1.0+popseq:2A:12276424:12280326:1 gene:Traes_2AS_007D8F7BD transcript:Traes_2AS_007D8F7BD.1	44 kDa	0.81	0.0741337	[]
Traes_2AS_18BA58F8D.1	peptidyl-prolyl cis-trans isomerase activity		pep:novel chromosome:IWGSC1.0+popseq:2A:70403846:70410156:1 gene:Traes_2AS_18BA58F8D transcript:Traes_2AS_18BA58F8D.1 description:"Cyclophilin-like peptidyl-prolyl cis-trans isomerase family protein"	49 kDa	0.81	-0.187662	[]
Traes_5AL_DC3E7B2BB.1	calcium ion binding		pep:novel scaffold:IWGSC1.0+popseq:IWGSC_CSS_5AL_scaff_2737886:978:6870:-1 gene:Traes_5AL_DC3E7B2BB transcript:Traes_5AL_DC3E7B2BB.1 description:"Calcium-binding EF hand family protein"	87 kDa	0.81	0.532813	[]
Traes_7AS_9C283FE66.1	glutamate-1-semialdehyde 2,1-aminomutase activity Source: UniProtKB-EC pyridoxal phosphate binding Source: InterPro transaminase activity	chlorophyll biosynthetic process Source: UniProtKB-UniPathway protoporphyrinogen IX biosynthetic process	Ortholog: Encodes a protein with homology to glutamate-1-semialdehyde 2,1-aminomutase catalyzing the conversion of glutamate-1-semialdehyde (GSA) into 5-amino levulinate. The expression of this gene was demonstrated to be light-induced	48 kDa	0.81	0.0263578	[]
Traes_7DL_930094B08.1	acetylserotonin O-methyltransferase activity Source: UniProtKB-EC caffeate O-methyltransferase activity Source: TAIR luteolin O-methyltransferase activity Source: UniProtKB myricetin 3'-O-methyltransferase activity Source: TAIR protein dimerization activity Source: InterPro quercetin 3'-O-methyltransferase activity Source: UniProtKB-EC quercetin 3-O-methyltransferase activity	flavonol biosynthetic process Source: TAIR lignin biosynthetic process Source: TAIR melatonin biosynthetic process	pep:known chromosome:IWGSC1.0+popseq:7D:70899004:70901125:-1 gene:Traes_7DL_930094B08 transcript:Traes_7DL_930094B08.1 description:"Flavone O-methyltransferase 1 "	39 kDa	0.81	0.0869116	[]
Traes_7DS_86C512854.1	3-phosphoshikimate 1-carboxyvinyltransferase activity	aromatic amino acid family biosynthetic process Source: UniProtKB-UniRule chorismate biosynthetic process	Ortholog: RNA 3'-terminal phosphate cyclase/enolpyruvate transferase, alpha/beta; FUNCTIONS IN: 3-phosphoshikimate 1-carboxyvinyltransferase activity, catalytic activity, transferase activity, transferring alkyl or aryl (other than methyl) groups; INVOLVED IN: glyphosate metabolic process, aromatic amino acid family biosynthetic process	42 kDa	0.81	-0.14255	[]
TRAES3BF142500040CFD_t1	fructose 1,6-bisphosphate 1-phosphatase activity Source: GO_Central metal ion binding Source: UniProtKB-KW sedoheptulose-bisphosphatase activity	carbohydrate biosynthetic process Source: TAIR defense response to bacterium Source: TAIR fructose 1,6-bisphosphate metabolic process Source: GO_Central fructose 6-phosphate metabolic process Source: GO_Central fructose metabolic process Source: GO_Central gluconeogenesis Source: GO_Central reductive pentose-phosphate cycle Source: TAIR starch biosynthetic process Source: TAIR sucrose biosyntheti…	Sedoheptulose-1,7-bisphosphatase, chloroplastic	42 kDa	0.81	-0.0317048	[]
Traes_2AL_0A039E562.1 (+1)	calcium ion binding Source: InterPro poly(U) RNA binding Source: TAIR protein domain specific binding	defense response to bacterium Source: TAIR photosynthesis, light reaction	Oxygen-evolving enhancer protein 2, chloroplastic	27 kDa	0.8	-0.0734826	[]
Traes_2AL_57B2ACCC0.1 (+3)	calcium ion binding	photosynthesis	pep:novel scaffold:IWGSC1.0+popseq:IWGSC_CSS_2AL_scaff_6337358:1346:2515:1 gene:Traes_2AL_57B2ACCC0 transcript:Traes_2AL_57B2ACCC0.1	26 kDa	0.8	0.570339	[]
Traes_2DS_C2EC0FB60.1	lactoylglutathione lyase activity Source: UniProtKB-EC metal ion binding Source: UniProtKB-KW protein domain specific binding		pep:novel scaffold:IWGSC1.0+popseq:IWGSC_CSS_2DS_scaff_5387080:313:6073:1 gene:Traes_2DS_C2EC0FB60 transcript:Traes_2DS_C2EC0FB60.1 description:"lactoylglutathione lyase family protein / glyoxalase I family protein"	26 kDa	0.8	0.201681	[]
Traes_4AL_85BCB2AF3.1 (+1)	?	?	pep:novel chromosome:IWGSC1.0+popseq:4A:169200700:169203586:1 gene:Traes_4AL_85BCB2AF3 transcript:Traes_4AL_85BCB2AF3.1 description:"NAD(P)-linked oxidoreductase superfamily protein"	33 kDa	0.8	-0.29636	[]
Traes_4AS_ABC75AC10.1	acyl binding Source: GO_Central acyl carrier activity Source: GO_Central cobalt ion binding Source: TAIR metal ion binding Source: TAIR phosphopantetheine binding	lipid A biosynthetic process Source: GO_Central oxidation-reduction process	pep:novel scaffold:IWGSC1.0+popseq:IWGSC_CSS_4AS_scaff_5981779:7339:12859:-1 gene:Traes_4AS_ABC75AC10 transcript:Traes_4AS_ABC75AC10.1	15 kDa	0.8	-0.415947	[]
Traes_4BL_45EEA5E2E.2	aspartic-type endopeptidase activity Source: GO_Central nucleotide binding	protein catabolic process Source: GO_Central proteolysis Source: GO_Central regulation of programmed cell death Source: EnsemblPlants systemic acquired resistance	pep:novel chromosome:IWGSC1.0+popseq:4B:284044028:284046461:1 gene:Traes_4BL_45EEA5E2E transcript:Traes_4BL_45EEA5E2E.2 description:"Eukaryotic aspartyl protease family protein"	53 kDa	0.8	-0.574417	[]
Traes_4BL_7D82EE2E5.2 (+1)	ATPase activity, coupled to transmembrane movement of substances Source: TAIR ATP binding Source: UniProtKB-KW transporter activity	embryo development ending in seed dormancy Source: TAIR thylakoid membrane organization	pep:novel chromosome:IWGSC1.0+popseq:4B:67908796:67914114:1 gene:Traes_4BL_7D82EE2E5 transcript:Traes_4BL_7D82EE2E5.2 description:"non-intrinsic ABC protein 7"	33 kDa	0.8	0.584518	[]
Traes_5BL_B6F59E7B61.2	phosphoric diester hydrolase activity	lipid metabolic process	pep:novel scaffold:IWGSC1.0+popseq:IWGSC_CSS_5BL_scaff_10799101:4206:5225:-1 gene:Traes_5BL_B6F59E7B61 transcript:Traes_5BL_B6F59E7B61.2	38 kDa	0.8	0.570339	[]
Traes_5BL_E86097AA2.1	chalcone isomerase activity	flavonoid biosynthetic process Source: TAIR response to auxin Source: TAIR response to karrikin Source: TAIR response to UV Source: TAIR response to UV-B	Ortholog: Catalyzes the conversion of chalcones into flavanones. Required for the accumulation of purple anthocyanins in leaves and stems. Co-expressed with CHS	24 kDa	0.8	-0.58537	[]
Traes_7BL_660FFDCE2.1	peptidyl-prolyl cis-trans isomerase activity	protein folding	pep:novel chromosome:IWGSC1.0+popseq:7B:205392400:205395360:1 gene:Traes_7BL_660FFDCE2 transcript:Traes_7BL_660FFDCE2.1	27 kDa	0.8	0.14378	[]
Traes_7DS_C44D1BDB7.1	manganese ion binding Source: InterPro nutrient reservoir activity		pep:novel chromosome:IWGSC1.0+popseq:7D:43290905:43291950:1 gene:Traes_7DS_C44D1BDB7 transcript:Traes_7DS_C44D1BDB7.1	22 kDa	0.8	-0.173531	[]
TRAES3BF151800050CFD_t1	heme binding Source: InterPro metal ion binding	alkane biosynthetic process Source: TAIR oxidation-reduction process	pep:novel scaffold:IWGSC1.0+popseq:v443_1518:85639:87520:-1 gene:TRAES3BF151800050CFD_g transcript:TRAES3BF151800050CFD_t1	15 kDa	0.8	-0.0470142	[]
Traes_2AL_0BD6646BA.1 (+1)	4-aminobutyrate:pyruvate transaminase activity Source: UniProtKB-EC 4-aminobutyrate transaminase activity Source: CACAO cobalt ion binding Source: TAIR gamma-aminobutyrate transaminase (glyoxylate dependent) activity Source: UniProtKB-EC pyridoxal phosphate binding Source: InterPro zinc ion binding	beta-alanine catabolic process Source: TAIR fruit development Source: TAIR gamma-aminobutyric acid catabolic process Source: TAIR gamma-aminobutyric acid metabolic process Source: TAIR glutamate decarboxylation to succinate Source: TAIR glutamate metabolic process Source: TAIR glutamine metabolic process Source: TAIR inositol metabolic process Source: TAIR pollen tube adhesion Source: TAIR pollen…	Ortholog: Genetically redundant with POP3;mediates pollen tube guidance. Double mutants are self sterile; gamma-aminobutyrate transaminase subunit precursor. Mutations in POP2/HER1 render roots resistant to the inhibitory growth effects of the volatile organic compound E-2-hexenal implicated in plant defense	56 kDa	0.79	-0.422577	[]
Traes_2DL_7306B3F29.1	ATP binding Source: UniProtKB-KW ubiquitin-protein transferase activity	ubiquitin-dependent protein catabolic process	pep:novel chromosome:IWGSC1.0+popseq:2D:150086043:150088655:-1 gene:Traes_2DL_7306B3F29 transcript:Traes_2DL_7306B3F29.1	22 kDa	0.79	-0.599499	[]
Traes_6AL_174253A751.1	copper ion binding Source: TAIR DNA binding Source: UniProtKB-KW glyceraldehyde-3-phosphate dehydrogenase (NAD+) (phosphorylating) activity Source: UniProtKB NAD binding Source: InterPro NADP binding Source: InterPro zinc ion binding	defense response to bacterium Source: TAIR gluconeogenesis Source: TAIR glycolytic process Source: TAIR response to cadmium ion Source: TAIR response to oxidative stress	pep:novel scaffold:IWGSC1.0+popseq:IWGSC_CSS_6AL_scaff_5816732:5720:8124:1 gene:Traes_6AL_174253A751 transcript:Traes_6AL_174253A751.1	37 kDa	0.79	0.034942	[]
Traes_6AS_3753A6F2C.1	cinnamyl-alcohol dehydrogenase activity Source: TAIR sinapyl alcohol dehydrogenase activity Source: UniProtKB-EC zinc ion binding	lignin biosynthetic process Source: TAIR response to karrikin	Ortholog: Encodes a catalytically active cinnamyl alcohol dehydrogenase which uses p-coumaryl aldehyde as a preferred substrate. It can also use caffeyl, coniferyl and d-hydroxyconiferyl aldehydes as substrates	39 kDa	0.79	-0.115683	[]
Traes_6AS_D3AA43E2B.1	?	?	pep:novel scaffold:IWGSC1.0+popseq:IWGSC_CSS_6AS_scaff_4406370:63:976:-1 gene:Traes_6AS_D3AA43E2B transcript:Traes_6AS_D3AA43E2B.1	25 kDa	0.79	-0.599499	[]
Traes_6DL_B7D3994AF.1	adenosine kinase activity Source: TAIR ATP binding Source: UniProtKB-KW copper ion binding	adenosine salvage Source: TAIR AMP salvage Source: UniProtKB-UniPathway response to cadmium ion Source: TAIR response to trehalose-6-phosphate Source: TAIR viral process	Ortholog: Involved in the salvage synthesis of adenylates and methyl recycling	37 kDa	0.79	-0.0137212	[]
Traes_7DS_A033CB10E.1	damaged DNA binding Source: InterPro polyubiquitin modification-dependent protein binding Source: UniProtKB proteasome binding Source: TAIR ubiquitin binding	nucleotide-excision repair Source: InterPro proteasome-mediated ubiquitin-dependent protein catabolic process Source: InterPro response to cold	pep:novel chromosome:IWGSC1.0+popseq:7D:37267706:37273646:1 gene:Traes_7DS_A033CB10E transcript:Traes_7DS_A033CB10E.1	42 kDa	0.79	-0.236297	[]
EPlTAEP00000010047 (+16)	magnesium ion binding Source: InterPro monooxygenase activity Source: UniProtKB-KW ribulose-bisphosphate carboxylase activity Source: UniProtKB-EC	photorespiration Source: UniProtKB-KW reductive pentose-phosphate cycle Source: UniProtKB-KW	Ribulose bisphosphate carboxylase large chain	53 kDa	0.78	-0.0733459	[]
EPlTAEP00000010056	large ribosomal subunit rRNA binding Source: GO_Central structural constituent of ribosome Source: InterPro	response to cytokinin Source: TAIR translation Source: InterPro	pep:novel chromosome:IWGSC1.0+popseq:Pt:76680:77051:-1 gene:EPlTAEG00000010056 transcript:EPlTAET00000010056 description:"50S ribosomal protein L14, chloroplastic"	13 kDa	0.78	-0.159107	[]
Traes_2AS_DCACC5AF9.3 (+2)	ATP binding Source: UniProtKB cytidylate kinase activity Source: UniProtKB uridylate kinase activity	de novo' pyrimidine nucleobase biosynthetic process Source: InterPro pyrimidine nucleotide biosynthetic process Source: UniProtKB pyrimidine ribonucleoside monophosphate metabolic process	P-loop containing nucleoside triphosphate hydrolases superfamily protein	24 kDa	0.78	-0.471921	[]
Traes_2DL_F48387F4E.1	copper ion binding Source: TAIR metal ion binding Source: TAIR superoxide dismutase activity	defense response to bacterium Source: TAIR embryo development ending in seed dormancy Source: TAIR response to salt stress Source: TAIR response to zinc ion	Ortholog: manganese superoxide dismutase (MSD1)	25 kDa	0.78	-0.0833881	[]
Traes_4AS_553C18F16.1 (+1)	GTPase activity Source: TAIR GTP binding Source: TAIR identical protein binding Source: IntAct metal ion binding Source: UniProtKB-KW P-P-bond-hydrolysis-driven protein transmembrane transporter activity	chloroplast localization Source: TAIR protein targeting to chloroplast	pep:novel chromosome:IWGSC1.0+popseq:4A:67797037:67800735:1 gene:Traes_4AS_553C18F16 transcript:Traes_4AS_553C18F16.1	36 kDa	0.78	0.61919	[]
Traes_4DS_29F298799.1	4-methylumbelliferyl-beta-D-glucopyranoside beta-glucosidase activity Source: TAIR amygdalin beta-glucosidase activity Source: TAIR beta-gentiobiose beta-glucosidase activity Source: TAIR beta-glucosidase activity Source: UniProtKB beta-mannosidase activity Source: UniProtKB cellobiose glucosidase activity Source: TAIR esculin beta-glucosidase activity Source: TAIR metal ion binding Source: UniPr…	carbohydrate metabolic process Source: InterPro glycosyl compound metabolic process	Ortholog: B-S glucosidase 44 (BGLU44); FUNCTIONS IN: in 6 functions; INVOLVED IN: carbohydrate metabolic process	54 kDa	0.78	-0.476622	[]
Traes_6AL_561563DC7.1 (+1)	pyruvate dehydrogenase (acetyl-transferring) activity	acetyl-CoA biosynthetic process from pyruvate Source: InterPro glycolytic process Source: UniProtKB-KW response to cadmium ion	pep:novel scaffold:IWGSC1.0+popseq:IWGSC_CSS_6AL_scaff_5830958:92:2863:1 gene:Traes_6AL_561563DC7 transcript:Traes_6AL_561563DC7.1	18 kDa	0.78	-0.633322	[]
Traes_6AS_621A7A571.1	heme binding Source: InterPro metal ion binding Source: UniProtKB-KW peroxidase activity	hydrogen peroxide catabolic process Source: UniProtKB-KW lignin biosynthetic process Source: TAIR positive regulation of syringal lignin biosynthetic process Source: TAIR response to oxidative stress Source: InterPro xylem development	pep:novel scaffold:IWGSC1.0+popseq:IWGSC_CSS_6AS_scaff_4378439:1842:3724:1 gene:Traes_6AS_621A7A571 transcript:Traes_6AS_621A7A571.1	18 kDa	0.78	-0.0847606	[]
Traes_6BS_562BA5C37.1	electron transfer activity		pep:novel scaffold:IWGSC1.0+popseq:IWGSC_CSS_6BS_scaff_2985514:7708:8531:1 gene:Traes_6BS_562BA5C37 transcript:Traes_6BS_562BA5C37.1	11 kDa	0.78	0.634077	[]
EPlTAEP00000010044	chlorophyll binding Source: TAIR electron transporter, transferring electrons within the cyclic electron transport pathway of photosynthesis activity Source: InterPro metal ion binding Source: UniProtKB-KW	photosynthetic electron transport in photosystem II Source: InterPro protein-chromophore linkage Source: UniProtKB-KW response to herbicide Source: UniProtKB-KW	pep:novel chromosome:IWGSC1.0+popseq:Pt:91:1152:-1 gene:EPlTAEG00000010044 transcript:EPlTAET00000010044 description:"Photosystem II protein D1"	39 kDa	0.77	0.090005	[]
Traes_2AS_A18A69CB0.2	chlorophyll binding Source: GO_Central metal ion binding Source: UniProtKB-KW pigment binding Source: GO_Central protein domain specific binding Source: CAFA structural molecule activity	photosynthesis Source: TAIR photosynthesis, light harvesting in photosystem I Source: GO_Central photosynthesis, light harvesting in photosystem II Source: UniProtKB protein-chromophore linkage Source: UniProtKB-KW regulation of stomatal movement Source: UniProtKB response to abscisic acid Source: UniProtKB response to herbicide Source: UniProtKB response to high light intensity	pep:novel chromosome:IWGSC1.0+popseq:2A:151819526:151820409:-1 gene:Traes_2AS_A18A69CB0 transcript:Traes_2AS_A18A69CB0.2 description:"light-harvesting chlorophyll B-binding protein 3"	28 kDa	0.77	-0.117301	[]
Traes_2BL_4B8B77E73.1	calcium ion binding Source: InterPro poly(U) RNA binding	photoinhibition Source: TAIR photosynthesis, light reaction Source: TAIR photosystem II assembly Source: TAIR photosystem II stabilization Source: TAIR regulation of protein dephosphorylation	pep:known chromosome:IWGSC1.0+popseq:2B:223450975:223452603:-1 gene:Traes_2BL_4B8B77E73 transcript:Traes_2BL_4B8B77E73.1 description:"Oxygen-evolving enhancer protein 1, chloroplastic "	34 kDa	0.77	-0.0234418	[]
Traes_2BS_51E9E0AD1.2	copper ion binding Source: TAIR oxidoreductase activity	response to cytokinin	pep:novel chromosome:IWGSC1.0+popseq:2B:36633216:36634082:-1 gene:Traes_2BS_51E9E0AD1 transcript:Traes_2BS_51E9E0AD1.2 description:"FAD/NAD(P)-binding oxidoreductase"	30 kDa	0.77	0.0623326	[]
Traes_2BS_9E10D26DB.1 (+2)	naringenin-chalcone synthase activity	auxin polar transport Source: TAIR flavonoid biosynthetic process Source: TAIR regulation of anthocyanin biosynthetic process Source: TAIR response to auxin Source: TAIR response to gravity Source: TAIR response to jasmonic acid Source: TAIR response to oxidative stress Source: TAIR response to UV-B Source: TAIR response to wounding	Ortholog: Encodes chalcone synthase (CHS), a key enzyme involved in the biosynthesis of flavonoids. Required for the accumulation of purple anthocyanins in leaves and stems	42 kDa	0.77	0.131637	[]
Traes_2DS_D106620BE.1		chlorophyll catabolic process Source: CACAO photosystem II assembly Source: TAIR positive regulation of stomatal opening Source: TAIR protein import into chloroplast stroma Source: TAIR protein import into chloroplast thylakoid membrane Source: TAIR regulation of reactive oxygen species biosynthetic process Source: TAIR regulation of response to water deprivation Source: TAIR sugar mediated signa…	Ortholog: Chloroplast-localized Thylakoid formation1 gene product involved in vesicle-mediated formation of thylakoid membranes. Thf1 antisense lines contain abnormal chloroplasts early in leaf development (chloroplasts have loosely stacked thylakoid membranes)	32 kDa	0.77	-0.124362	[]
Traes_5AS_9F681D8F1.1 (+1)	rRNA binding Source: GO_Central structural constituent of ribosome	positive regulation of translational fidelity Source: GO_Central translation	Ortholog: Ribosomal protein S4; FUNCTIONS IN: structural constituent of ribosome; INVOLVED IN: translation	22 kDa	0.77	-0.473476	[]
Traes_7DL_44F6042FE.1	catalase activity Source: TAIR cobalt ion binding Source: TAIR heme binding	cell death Source: TAIR cell redox homeostasis Source: TAIR cellular response to nitrogen starvation Source: TAIR cellular response to phosphate starvation Source: TAIR cellular response to sulfate starvation Source: TAIR hydrogen peroxide catabolic process Source: GO_Central photoperiodism Source: TAIR response to cold Source: TAIR response to hydrogen peroxide Source: GO_Central response to lig…	pep:known chromosome:IWGSC1.0+popseq:7D:234519661:234523458:-1 gene:Traes_7DL_44F6042FE transcript:Traes_7DL_44F6042FE.1 description:"Catalase "	57 kDa	0.77	0.240352	[]
TRAES3BF004400020CFD_t1	mRNA binding Source: TAIR structural constituent of ribosome	translation	pep:novel chromosome:IWGSC1.0+popseq:3B:582908368:582910644:-1 gene:TRAES3BF004400020CFD_g transcript:TRAES3BF004400020CFD_t1	30 kDa	0.77	0.111344	[]
Traes_1AL_629D67563.2	mRNA binding Source: TAIR structural constituent of ribosome	ribosomal small subunit assembly Source: GO_Central translation	pep:novel chromosome:IWGSC1.0+popseq:1A:66965136:66965663:1 gene:Traes_1AL_629D67563 transcript:Traes_1AL_629D67563.2	16 kDa	0.76	0.359516	[]
Traes_2AL_A9D390619.1 (+2)	mRNA binding Source: TAIR sequence-specific DNA binding Source: InterPro transcription coactivator activity	positive regulation of transcription, DNA-templated Source: TAIR transcription, DNA-templated	pep:novel scaffold:IWGSC1.0+popseq:IWGSC_CSS_2AL_scaff_6357944:588:5924:-1 gene:Traes_2AL_A9D390619 transcript:Traes_2AL_A9D390619.1	16 kDa	0.76	-0.493972	[]
Traes_2BL_90B7C23BB.2	oxidoreductase activity		pep:novel scaffold:IWGSC1.0+popseq:IWGSC_CSS_2BL_scaff_8044518:1251:4676:-1 gene:Traes_2BL_90B7C23BB transcript:Traes_2BL_90B7C23BB.2	41 kDa	0.76	0.702761	[]
Traes_4AL_ADF93BAC5.1	3-chloroallyl aldehyde dehydrogenase activity Source: TAIR aldehyde dehydrogenase (NAD) activity Source: TAIR aldehyde dehydrogenase [NAD(P)+] activity	cellular aldehyde metabolic process Source: InterPro response to abscisic acid Source: TAIR response to desiccation Source: TAIR response to salt stress	Ortholog: Encodes an aldehyde dehydrogenase induced by ABA and dehydration that can oxidize saturated aliphatic aldehydes. It is also able to oxidize beta-unsaturated aldehydes, but not aromatic aldehydes	52 kDa	0.76	-0.107043	[]
Traes_4AS_B978C93FA.1	ATP binding Source: TAIR ubiquitin protein ligase binding	protein ubiquitination Source: UniProtKB regulation of transcription, DNA-templated Source: UniProtKB-KW response to bacterium Source: TAIR response to cadmium ion Source: TAIR response to heat Source: UniProtKB response to high light intensity Source: TAIR response to hydrogen peroxide Source: TAIR response to temperature stimulus Source: TAIR response to virus Source: TAIR transcription, DNA-te…	Ortholog: heat shock protein 70 (HSP70); FUNCTIONS IN: ATP binding; INVOLVED IN: in 9 processes	71 kDa	0.76	-0.0293085	[]
Traes_4DS_F0D78C97E.3	cyclosporin A binding Source: TAIR peptidyl-prolyl cis-trans isomerase activity	protein folding Source: InterPro response to cadmium ion Source: TAIR signal transduction	pep:novel scaffold:IWGSC1.0+popseq:IWGSC_CSS_4DS_scaff_1146861:7260:8525:-1 gene:Traes_4DS_F0D78C97E transcript:Traes_4DS_F0D78C97E.3 description:"rotamase cyclophilin 2"	19 kDa	0.76	0.344328	[]
Traes_5BL_F4886BCFD.1	catalytic activity Source: InterPro coenzyme binding		pep:novel chromosome:IWGSC1.0+popseq:5B:182681369:182685636:1 gene:Traes_5BL_F4886BCFD transcript:Traes_5BL_F4886BCFD.1	38 kDa	0.76	-0.240378	[]
Traes_7DS_85EA05C41.1	peptidyl-prolyl cis-trans isomerase activity	defense response to bacterium	pep:novel chromosome:IWGSC1.0+popseq:7D:64381968:64386393:1 gene:Traes_7DS_85EA05C41 transcript:Traes_7DS_85EA05C41.1 description:"cyclophilin 38"	46 kDa	0.76	0.690361	[]
TRAES3BF020100150CFD_t1	carbohydrate binding	defense response to bacterium Source: TAIR stomatal closure	pep:novel chromosome:IWGSC1.0+popseq:3B:67722854:67724866:-1 gene:TRAES3BF020100150CFD_g transcript:TRAES3BF020100150CFD_t1	37 kDa	0.76	-0.0570179	[]
TRAES3BF082600110CFD_t1		protein K69-linked ufmylation	pep:novel chromosome:IWGSC1.0+popseq:3B:756470505:756472620:1 gene:TRAES3BF082600110CFD_g transcript:TRAES3BF082600110CFD_t1	10 kDa	0.76	-0.364022	[]
TRAES3BF169900010CFD_t1		circadian rhythm	pep:novel chromosome:IWGSC1.0+popseq:3B:23951036:23954320:-1 gene:TRAES3BF169900010CFD_g transcript:TRAES3BF169900010CFD_t1 description:"plastid transcriptionally active 16"	53 kDa	0.76	-0.0544723	[]
Traes_1AS_E58B0B23A.2 (+2)	RNA binding Source: GO_Central rRNA binding Source: UniProtKB-KW structural constituent of ribosome	translation	pep:novel chromosome:IWGSC1.0+popseq:1A:156328017:156329505:1 gene:Traes_1AS_E58B0B23A transcript:Traes_1AS_E58B0B23A.2	28 kDa	0.75	0.116296	[]
Traes_2BL_2FD539228.2	oxidoreductase activity		NAD(P)-linked oxidoreductase superfamily protein; FUNCTIONS IN: oxidoreductase activity, aldo-keto reductase activity; INVOLVED IN: oxidation reduction	18 kDa	0.75	0.503661	[]
Traes_2BL_7D700A166.1 (+2)	cysteine-type endopeptidase activity Source: GO_Central cysteine-type peptidase activity Source: TAIR peptidase activity	defense response to fungus Source: TAIR proteolysis Source: TAIR proteolysis involved in cellular protein catabolic process	pep:novel chromosome:IWGSC1.0+popseq:2B:322152217:322156121:-1 gene:Traes_2BL_7D700A166 transcript:Traes_2BL_7D700A166.1	51 kDa	0.75	0.133884	[]
Traes_2DS_7FA2B76541.1	copper ion binding Source: UniProtKB nickel cation binding	negative regulation of reductive pentose-phosphate cycle Source: TAIR reductive pentose-phosphate cycle Source: UniProtKB-KW response to sucrose	pep:novel chromosome:IWGSC1.0+popseq:2D:3968505:3970474:-1 gene:Traes_2DS_7FA2B76541 transcript:Traes_2DS_7FA2B76541.1	13 kDa	0.75	-0.501272	[]
Traes_4AL_E5490C0D0.1 (+5)	metal ion binding Source: UniProtKB-KW structural constituent of ribosome	ribosomal small subunit assembly Source: GO_Central translation	Ortholog: Arabidopsis ribosomal protein	10 kDa	0.75	0.507458	[]
Traes_5DL_FCF08AEA6.1	acetyl-CoA C-acetyltransferase activity Source: TAIR metal ion binding	fatty acid beta-oxidation Source: GO_Central isoprenoid biosynthetic process Source: UniProtKB-KW pollen germination Source: TAIR pollen tube growth Source: TAIR sterol metabolic process	pep:novel chromosome:IWGSC1.0+popseq:5D:81636450:81642950:-1 gene:Traes_5DL_FCF08AEA6 transcript:Traes_5DL_FCF08AEA6.1	41 kDa	0.75	-0.272799	[]
Traes_7AL_09A36AAE41.2 (+1)	structural constituent of ribosome	translation	pep:novel chromosome:IWGSC1.0+popseq:7A:174231098:174231721:-1 gene:Traes_7AL_09A36AAE41 transcript:Traes_7AL_09A36AAE41.2	15 kDa	0.75	-0.737447	[]
TRAES3BF154700090CFD_t1	calcium ion binding	photosynthesis	pep:novel scaffold:IWGSC1.0+popseq:v443_1547:419192:420184:-1 gene:TRAES3BF154700090CFD_g transcript:TRAES3BF154700090CFD_t1 description:"Mog1/PsbP/DUF1795-like photosystem II reaction center PsbP family protein"	29 kDa	0.75	-0.0730845	[]
Traes_1BS_D3FD8CC9D.1	ATP binding Source: UniProtKB-KW glutamate-cysteine ligase activity	defense response by callose deposition in cell wall Source: TAIR defense response to bacterium Source: TAIR defense response to bacterium, incompatible interaction Source: TAIR defense response to fungus Source: TAIR defense response to insect Source: TAIR flower development Source: TAIR glucosinolate biosynthetic process Source: TAIR glutathione biosynthetic process Source: TAIR indole phytoalex…	pep:novel scaffold:IWGSC1.0+popseq:IWGSC_CSS_1BS_scaff_3474003:5686:12450:1 gene:Traes_1BS_D3FD8CC9D transcript:Traes_1BS_D3FD8CC9D.1 description:"glutamate-cysteine ligase"	69 kDa	0.74	0.115377	[]
Traes_1DL_E31CD9338.1		regulation of transcription, DNA-templated Source: UniProtKB-KW response to salt stress Source: TAIR transcription, DNA-templated	Ortholog: Nascent polypeptide-associated complex NAC; FUNCTIONS IN: molecular_function unknown; INVOLVED IN: response to salt stress	18 kDa	0.74	0.241591	[]
Traes_3AS_541E182FC.2	DNA binding Source: UniProtKB-KW protein heterodimerization activity		pep:novel scaffold:IWGSC1.0+popseq:IWGSC_CSS_3AS_scaff_3325779:3785:4333:-1 gene:Traes_3AS_541E182FC transcript:Traes_3AS_541E182FC.2	20 kDa	0.74	0.096056	[]
Traes_4AS_5C2E130E1.1	structural constituent of ribosome	response to cytokinin Source: TAIR translation	pep:novel chromosome:IWGSC1.0+popseq:4A:29491441:29495137:-1 gene:Traes_4AS_5C2E130E1 transcript:Traes_4AS_5C2E130E1.1 description:"ribosomal protein L15"	28 kDa	0.74	-0.263061	[]
Traes_4BS_67A99EB9A.2	mRNA binding Source: TAIR nuclease activity Source: GO_Central RNA binding	cellular response to heat Source: UniProtKB gene silencing by RNA Source: InterPro gibberellin biosynthetic process Source: TAIR mRNA catabolic process Source: UniProtKB mRNA processing Source: UniProtKB positive regulation of gibberellin biosynthetic process Source: UniProtKB response to cadmium ion Source: TAIR response to salt stress Source: TAIR seed germination	Ortholog: Involved in the regulation of AtGA20ox3 expression, as well as seed germination	109 kDa	0.74	0.122782	[]
Traes_5BL_87B2B02B0.1	mRNA binding Source: TAIR poly(U) RNA binding	innate immune response Source: TAIR mRNA processing Source: UniProtKB-KW RNA modification	pep:novel chromosome:IWGSC1.0+popseq:5B:210952924:210954808:-1 gene:Traes_5BL_87B2B02B0 transcript:Traes_5BL_87B2B02B0.1	23 kDa	0.74	-0.0756544	[]
Traes_6AS_C62370B4B.1	ATP binding Source: UniProtKB-KW protein binding involved in protein folding Source: GO_Central unfolded protein binding	de novo' protein folding Source: GO_Central chaperone-mediated protein folding Source: GO_Central response to cadmium ion	pep:novel chromosome:IWGSC1.0+popseq:6A:91642025:91647369:1 gene:Traes_6AS_C62370B4B transcript:Traes_6AS_C62370B4B.1 description:"TCP-1/cpn60 chaperonin family protein"	60 kDa	0.74	0.301988	[]
Traes_5AS_33A86266A.1 (+1)	nuclear localization sequence binding Source: GO_Central protein transporter activity Source: TAIR Ran GTPase binding	NLS-bearing protein import into nucleus Source: GO_Central protein import into nucleus Source: TAIR protein import into nucleus, translocation Source: GO_Central ribosomal protein import into nucleus	Ortholog: ARM repeat superfamily protein; FUNCTIONS IN: protein transporter activity, binding; INVOLVED IN: intracellular protein transport, protein import into nucleus, docking	96 kDa	0.73	-0.623363	[]
Traes_5BL_DBC5D12AB.1	chlorophyll binding Source: GO_Central metal ion binding Source: UniProtKB-KW pigment binding Source: GO_Central protein domain specific binding	photosynthesis, light harvesting in photosystem I Source: UniProtKB protein-chromophore linkage Source: UniProtKB-KW response to cold Source: UniProtKB response to high light intensity Source: UniProtKB response to karrikin Source: TAIR response to low light intensity stimulus	pep:novel chromosome:IWGSC1.0+popseq:5B:157410301:157411703:1 gene:Traes_5BL_DBC5D12AB transcript:Traes_5BL_DBC5D12AB.1 description:"light-harvesting chlorophyll-protein complex I subunit A4"	27 kDa	0.73	0.0322643	[]
Traes_7DL_96D46C529.1	ATP binding Source: UniProtKB-KW ATP-dependent peptidase activity Source: TAIR metalloendopeptidase activity Source: InterPro metallopeptidase activity Source: GO_Central zinc ion binding	multicellular organism development Source: UniProtKB-KW photoinhibition Source: GO_Central photosystem II repair Source: GO_Central proteolysis Source: GO_Central PSII associated light-harvesting complex II catabolic process Source: TAIR thylakoid membrane organization	pep:novel chromosome:IWGSC1.0+popseq:7D:215407673:215411775:-1 gene:Traes_7DL_96D46C529 transcript:Traes_7DL_96D46C529.1	72 kDa	0.73	-0.0828689	[]
Traes_2AS_3953901E4.1	copper ion binding Source: TAIR monooxygenase activity Source: UniProtKB-KW ribulose-bisphosphate carboxylase activity	chloroplast ribulose bisphosphate carboxylase complex biogenesis Source: TAIR photorespiration Source: UniProtKB-KW photosynthesis Source: TAIR reductive pentose-phosphate cycle Source: UniProtKB-KW response to blue light Source: TAIR response to cold Source: TAIR response to far red light Source: TAIR response to red light	Ortholog: Encodes a member of the Rubisco small subunit (RBCS) multigene family: RBCS1A (At1g67090), RBCS1B (At5g38430), RBCS2B (At5g38420), and RBCS3B (At5g38410). Functions to yield sufficient Rubisco content for leaf photosynthetic capacity	21 kDa	0.72	0.124079	[]
Traes_6BL_919F8C482.1	glycerophosphodiester phosphodiesterase activity	glycerol metabolic process Source: UniProtKB-KW guard cell morphogenesis Source: TAIR lipid metabolic process Source: InterPro plant-type cell wall cellulose metabolic process Source: TAIR trichome differentiation	pep:novel scaffold:IWGSC1.0+popseq:IWGSC_CSS_6BL_scaff_4299694:1041:5806:-1 gene:Traes_6BL_919F8C482 transcript:Traes_6BL_919F8C482.1	81 kDa	0.72	-0.306099	[]
Traes_6DL_C6E63ED1C.1	oxidoreductase activity, acting on a sulfur group of donors, disulfide as acceptor Source: GO_Central protein disulfide oxidoreductase activity Source: GO_Central protein-disulfide reductase activity Source: GO_Central thioredoxin-disulfide reductase activity	cell redox homeostasis Source: UniProtKB cellular response to oxidative stress Source: GO_Central glycerol ether metabolic process Source: InterPro response to oxidative stress Source: UniProtKB response to water deprivation	Chloroplastic drought-induced stress protein of 32 kD	33 kDa	0.72	0.104687	[]
Traes_7AL_4B8348CBB.1 (+1)	dioxygenase activity Source: UniProtKB-KW lactoylglutathione lyase activity Source: TAIR metal ion binding	methylglyoxal catabolic process to D-lactate via S-lactoyl-glutathione Source: TAIR response to cadmium ion	pep:novel scaffold:IWGSC1.0+popseq:IWGSC_CSS_7AL_scaff_4372913:1732:3401:-1 gene:Traes_7AL_4B8348CBB transcript:Traes_7AL_4B8348CBB.1	33 kDa	0.72	0.0786753	[]
TRAES3BF065400030CFD_t1	acetylserotonin O-methyltransferase activity Source: UniProtKB-EC caffeate O-methyltransferase activity Source: TAIR luteolin O-methyltransferase activity Source: UniProtKB myricetin 3'-O-methyltransferase activity Source: TAIR protein dimerization activity Source: InterPro quercetin 3'-O-methyltransferase activity Source: UniProtKB-EC quercetin 3-O-methyltransferase activity	flavonol biosynthetic process Source: TAIR lignin biosynthetic process Source: TAIR melatonin biosynthetic process	pep:known chromosome:IWGSC1.0+popseq:3B:773213126:773214336:1 gene:TRAES3BF065400030CFD_g transcript:TRAES3BF065400030CFD_t1 description:"Tricetin 3',4',5'-O-trimethyltransferase "	39 kDa	0.72	-0.195785	[]
TRAES3BF152900030CFD_t1	ATP binding Source: TAIR copper ion binding Source: TAIR double-stranded DNA binding Source: TAIR misfolded RNA binding Source: UniProtKB RNA binding Source: UniProtKB single-stranded DNA binding	cold acclimation Source: UniProtKB negative regulation of DNA-templated transcription, termination Source: UniProtKB response to cold Source: TAIR response to osmotic stress Source: TAIR response to salt stress Source: UniProtKB response to water deprivation Source: UniProtKB seed germination	pep:novel chromosome:IWGSC1.0+popseq:3B:673854135:673855205:-1 gene:TRAES3BF152900030CFD_g transcript:TRAES3BF152900030CFD_t1	17 kDa	0.72	0.84064	[]
Traes_4BL_362225B2C.1	translation initiation factor activity	response to cadmium ion Source: TAIR response to salt stress	pep:novel chromosome:IWGSC1.0+popseq:4B:24000885:24005147:1 gene:Traes_4BL_362225B2C transcript:Traes_4BL_362225B2C.1	36 kDa	0.71	0.437254	[]
Traes_4DS_058D6EF22.1	threonine-type endopeptidase activity	proteolysis involved in cellular protein catabolic process Source: InterPro response to cadmium ion Source: TAIR response to salt stress	Ortholog: 20S proteasome beta subunit PBG1 (PBG1)	27 kDa	0.71	0.190311	[]
Traes_4DS_B22F6AB77.2	flavin adenine dinucleotide binding Source: InterPro oxidoreductase activity, acting on CH-OH group of donors		pep:novel scaffold:IWGSC1.0+popseq:IWGSC_CSS_4DS_scaff_2310835:3378:5656:-1 gene:Traes_4DS_B22F6AB77 transcript:Traes_4DS_B22F6AB77.2	60 kDa	0.71	0.480016	[]
Traes_7DL_D222F9E90.1	hydrolase activity Source: UniProtKB-KW metal ion binding	metabolic process	pep:novel chromosome:IWGSC1.0+popseq:7D:74299152:74304627:-1 gene:Traes_7DL_D222F9E90 transcript:Traes_7DL_D222F9E90.1 description:"Haloacid dehalogenase-like hydrolase (HAD) superfamily protein"	34 kDa	0.71	-0.269545	[]
Traes_1AS_A8AD3BE99.2 (+2)	ATP binding Source: UniProtKB-KW structural constituent of cytoskeleton	cell division Source: TAIR response to auxin Source: TAIR response to light stimulus Source: TAIR response to wounding Source: TAIR root development Source: TAIR root epidermal cell differentiation Source: TAIR root hair elongation Source: TAIR seed germination	Ortholog: Member of Actin gene family.Mutants are defective in germination and root growth	45 kDa	0.7	-0.0702381	[]
Traes_2BL_BF713EB9C.2	?	?	pep:novel scaffold:IWGSC1.0+popseq:IWGSC_CSS_2BL_scaff_8047067:343:1574:1 gene:Traes_2BL_BF713EB9C transcript:Traes_2BL_BF713EB9C.2	30 kDa	0.7	-0.627673	[]
Traes_2BL_EBB1E8AC6.1	heme binding Source: InterPro metal ion binding Source: UniProtKB-KW peroxidase activity	hydrogen peroxide catabolic process Source: UniProtKB-KW plant-type cell wall organization Source: GO_Central response to oxidative stress	pep:novel scaffold:IWGSC1.0+popseq:IWGSC_CSS_2BL_scaff_7985397:217:1619:1 gene:Traes_2BL_EBB1E8AC6 transcript:Traes_2BL_EBB1E8AC6.1	35 kDa	0.7	0.428596	[]
Traes_4BS_26CF16F39.1 (+1)	N-acyltransferase activity		pep:novel scaffold:IWGSC1.0+popseq:IWGSC_CSS_4BS_scaff_4892132:8144:8863:-1 gene:Traes_4BS_26CF16F39 transcript:Traes_4BS_26CF16F39.1	27 kDa	0.7	-0.602645	[]
Traes_4DL_DBA53B48C.1	ATP binding Source: UniProtKB-KW hydrolase activity	cell cycle Source: UniProtKB-KW cell division Source: UniProtKB-KW protein transport	pep:novel chromosome:IWGSC1.0+popseq:4D:28560224:28564769:-1 gene:Traes_4DL_DBA53B48C transcript:Traes_4DL_DBA53B48C.1	90 kDa	0.7	-0.0827891	[]
Traes_5BL_D699B2815.1	mRNA binding Source: TAIR structural constituent of ribosome	cytoplasmic translation	pep:novel chromosome:IWGSC1.0+popseq:5B:247230106:247232745:1 gene:Traes_5BL_D699B2815 transcript:Traes_5BL_D699B2815.1	44 kDa	0.7	-0.103434	[]
Traes_5DL_BF47BE671.1	alpha-mannosidase activity Source: GO_Central carbohydrate binding Source: InterPro metal ion binding	mannose metabolic process Source: GO_Central protein deglycosylation	pep:novel chromosome:IWGSC1.0+popseq:5D:148468073:148477380:-1 gene:Traes_5DL_BF47BE671 transcript:Traes_5DL_BF47BE671.1 description:"Glycosyl hydrolase family 38 protein"	101 kDa	0.7	-0.0775896	[]
Traes_6DS_1E81EBF0F.2	3-hydroxybutyrate dehydrogenase activity Source: TAIR glyoxylate reductase (NADP) activity Source: UniProtKB-EC NAD binding Source: InterPro phosphogluconate dehydrogenase (decarboxylating) activity	response to oxidative stress	pep:novel chromosome:IWGSC1.0+popseq:6D:34748574:34749532:1 gene:Traes_6DS_1E81EBF0F transcript:Traes_6DS_1E81EBF0F.2	17 kDa	0.7	0.916018	[]
Traes_7AS_9DF135C9F.1	ATP binding Source: UniProtKB-KW fructokinase activity	carbohydrate biosynthetic process Source: TAIR fatty acid biosynthetic process Source: TAIR fructose metabolic process Source: TAIR starch biosynthetic process	pep:novel chromosome:IWGSC1.0+popseq:7A:39164550:39171247:-1 gene:Traes_7AS_9DF135C9F transcript:Traes_7AS_9DF135C9F.1 description:"pfkB-like carbohydrate kinase family protein"	38 kDa	0.7	0.897114	[]
Traes_7DS_E1BAD4250.1	carboxylic ester hydrolase activity Source: UniProtKB-KW hydrolase activity	catabolic process	Ortholog: alpha/beta-Hydrolases superfamily protein; FUNCTIONS IN: hydrolase activity; INVOLVED IN: metabolic process	17 kDa	0.7	-0.226406	[]
TRAES3BF042100190CFD_t1	ATP binding Source: UniProtKB-KW carbamoyl-phosphate synthase (ammonia) activity Source: GO_Central carbamoyl-phosphate synthase (glutamine-hydrolyzing) activity Source: TAIR metal ion binding	de novo' UMP biosynthetic process Source: UniProtKB-UniPathway arginine biosynthetic process Source: GO_Central cellular response to phosphate starvation Source: TAIR urea cycle	Carbamoyl phosphate synthetase B	128 kDa	0.7	-0.363863	[]
TRAES3BF065400180CFD_t1	chromatin binding Source: TAIR DNA binding Source: UniProtKB-KW protein heterodimerization activity		pep:novel chromosome:IWGSC1.0+popseq:3B:772944026:772944656:1 gene:TRAES3BF065400180CFD_g transcript:TRAES3BF065400180CFD_t1	19 kDa	0.7	0.154119	[]
Traes_1BL_611DF0433.1 (+1)	cysteine-type endopeptidase activity	proteolysis involved in cellular protein catabolic process	pep:novel chromosome:IWGSC1.0+popseq:1B:253120385:253123163:1 gene:Traes_1BL_611DF0433 transcript:Traes_1BL_611DF0433.1	32 kDa	0.69	-0.257107	[]
Traes_2AS_7EEC0FD32.1	ATP binding Source: InterPro chaperone binding Source: GO_Central copper ion binding Source: TAIR unfolded protein binding	chaperone cofactor-dependent protein refolding Source: GO_Central response to heat Source: TAIR response to unfolded protein	pep:novel chromosome:IWGSC1.0+popseq:2A:153585538:153588124:1 gene:Traes_2AS_7EEC0FD32 transcript:Traes_2AS_7EEC0FD32.1	19 kDa	0.69	0.630672	[]
Traes_4AL_351DA9BAE.1	alpha-L-arabinofuranosidase activity Source: TAIR xylan 1,4-beta-xylosidase activity	L-arabinose metabolic process Source: InterPro xylan catabolic process	Ortholog: Encodes a bifunctional alpha-l-arabinofuranosidase/beta-d-xylosidase that belongs to family 51 of glycoside hydrolases. It may be involved in cell wall modification	72 kDa	0.69	-0.306653	[]
Traes_4AS_CDEB9D532.2 (+1)	omega-amidase activity Source: UniProtKB zinc ion binding	malate metabolic process Source: UniProtKB nitrogen compound metabolic process Source: InterPro oxaloacetate metabolic process	Nitrilase/cyanide hydratase and apolipoprotein N-acyltransferase family protein	38 kDa	0.69	0.0976258	[]
Traes_4BL_F8E57B81A.1	glutathione transferase activity	glutathione metabolic process Source: GO_Central protein glutathionylation Source: GO_Central response to cadmium ion Source: TAIR response to toxic substance	pep:novel scaffold:IWGSC1.0+popseq:IWGSC_CSS_4BL_scaff_6995387:4136:6585:-1 gene:Traes_4BL_F8E57B81A transcript:Traes_4BL_F8E57B81A.1	33 kDa	0.69	-0.130414	[]
Traes_5DL_FAF23C705.1	kinase activity Source: UniProtKB-KW magnesium ion binding Source: InterPro potassium ion binding Source: InterPro pyruvate kinase activity	glycolytic process Source: GO_Central response to cadmium ion	pep:novel scaffold:IWGSC1.0+popseq:IWGSC_CSS_5DL_scaff_4551325:1314:7125:-1 gene:Traes_5DL_FAF23C705 transcript:Traes_5DL_FAF23C705.1	57 kDa	0.69	0.119311	[]
Traes_6DL_DC91E760F.1	isocitrate dehydrogenase (NAD+) activity Source: TAIR metal ion binding	isocitrate metabolic process Source: TAIR tricarboxylic acid cycle	pep:novel chromosome:IWGSC1.0+popseq:6D:132516561:132520963:-1 gene:Traes_6DL_DC91E760F transcript:Traes_6DL_DC91E760F.1	40 kDa	0.69	0.325777	[]
Traes_7DS_309E71F44.1	L-malate dehydrogenase activity Source: GO_Central malate dehydrogenase (NADP+) activity Source: UniProtKB-EC NAD(P)+ transhydrogenase activity	carbohydrate metabolic process Source: InterPro malate metabolic process Source: GO_Central NADH metabolic process Source: GO_Central oxaloacetate metabolic process Source: GO_Central response to redox state Source: TAIR tricarboxylic acid cycle	pep:novel chromosome:IWGSC1.0+popseq:7D:108575588:108579310:-1 gene:Traes_7DS_309E71F44 transcript:Traes_7DS_309E71F44.1	47 kDa	0.69	-0.329079	[]
TRAES3BF058200010CFD_t1 (+1)	mRNA binding Source: TAIR rRNA binding Source: GO_Central structural constituent of ribosome	response to cytokinin Source: TAIR ribosomal small subunit assembly Source: GO_Central translation	pep:novel chromosome:IWGSC1.0+popseq:3B:69459916:69461354:1 gene:TRAES3BF058200010CFD_g transcript:TRAES3BF058200010CFD_t1	22 kDa	0.69	-0.163937	[]
Traes_1AL_AA8600338.2	mRNA binding		pep:novel chromosome:IWGSC1.0+popseq:1A:54549923:54555510:1 gene:Traes_1AL_AA8600338 transcript:Traes_1AL_AA8600338.2	58 kDa	0.68	0.985387	[]
Traes_1BL_D62755E8A.1	carboxypeptidase activity Source: UniProtKB-KW dipeptidyl-peptidase activity Source: GO_Central serine-type peptidase activity	proteolysis	pep:novel chromosome:IWGSC1.0+popseq:1B:169181026:169186305:1 gene:Traes_1BL_D62755E8A transcript:Traes_1BL_D62755E8A.1	56 kDa	0.68	-0.481379	[]
Traes_4BL_A9FAA75A9.1	glyceraldehyde-3-phosphate dehydrogenase (NAD+) (phosphorylating) activity Source: TAIR glyceraldehyde-3-phosphate dehydrogenase (NADP+) (phosphorylating) activity Source: UniProtKB-EC NAD binding Source: InterPro NADP binding	glucose metabolic process Source: InterPro reductive pentose-phosphate cycle Source: TAIR response to cadmium ion Source: TAIR response to cold Source: TAIR response to light stimulus Source: TAIR response to sucrose	Ortholog: Encodes chloroplast localized glyceraldehyde-3-phosphate dehydrogenase that can use both NADH and NADPH to reduce 1,3-diphosphate glycerate. It forms A2B2 heterotetramers with GapA forms of the GADPH enzyme	28 kDa	0.68	0.0466369	[]
Traes_4BS_6EAD366CD.1 (+1)	RNA binding Source: GO_Central rRNA binding Source: UniProtKB-KW structural constituent of ribosome	embryo development ending in seed dormancy Source: TAIR response to cytokinin Source: TAIR translation	pep:novel chromosome:IWGSC1.0+popseq:4B:148693569:148696826:-1 gene:Traes_4BS_6EAD366CD transcript:Traes_4BS_6EAD366CD.1 description:"Ribosomal protein L6 family"	25 kDa	0.68	-0.309992	[]
Traes_4DS_C945D27BF.1	ATP binding Source: UniProtKB-KW metal ion binding Source: UniProtKB-KW nucleoside diphosphate kinase activity	cellular response to hydrogen peroxide Source: UniProtKB CTP biosynthetic process Source: InterPro GTP biosynthetic process Source: InterPro nucleoside diphosphate phosphorylation Source: UniProtKB UTP biosynthetic process	pep:novel scaffold:IWGSC1.0+popseq:IWGSC_CSS_4DS_scaff_2317565:4347:6877:1 gene:Traes_4DS_C945D27BF transcript:Traes_4DS_C945D27BF.1	17 kDa	0.68	-0.661478	[]
Traes_4DS_FBD4A3D88.1 (+1)	mRNA binding		pep:novel chromosome:IWGSC1.0+popseq:4D:4784387:4787217:1 gene:Traes_4DS_FBD4A3D88 transcript:Traes_4DS_FBD4A3D88.1	39 kDa	0.68	0.985387	[]
Traes_6AL_B393E6BCC.2		photosystem II oxygen evolving complex assembly Source: TAIR response to cytokinin	pep:known scaffold:IWGSC1.0+popseq:IWGSC_CSS_6AL_scaff_5826587:5256:7312:1 gene:Traes_6AL_B393E6BCC transcript:Traes_6AL_B393E6BCC.2 description:"Photosystem II 10 kDa polypeptide "	15 kDa	0.68	-0.113791	[]
Traes_7AL_F255D54F8.2	peptidyl-prolyl cis-trans isomerase activity		pep:novel chromosome:IWGSC1.0+popseq:7A:141912107:141916074:-1 gene:Traes_7AL_F255D54F8 transcript:Traes_7AL_F255D54F8.2 description:"Cyclophilin-like peptidyl-prolyl cis-trans isomerase family protein"	38 kDa	0.68	0.671773	[]
Traes_7AS_1839BE651.1	calcium ion binding	photosynthesis	Ortholog: Conceptual translation of this open reading frame gave the sequence of a 229-residue hypothetical protein that contains the same sequence as the mature A	26 kDa	0.68	0.0747604	[]
Traes_3DL_6207B0CD3.1	copper ion binding Source: TAIR isocitrate dehydrogenase (NADP+) activity Source: TAIR magnesium ion binding Source: InterPro NAD binding	defense response to bacterium Source: TAIR isocitrate metabolic process Source: TAIR NADP metabolic process Source: TAIR response to cadmium ion Source: TAIR response to salt stress Source: TAIR response to zinc ion Source: TAIR tricarboxylic acid cycle	Ortholog: Encodes a NADP+-isocitrate dehydrogenase that is believed to function in the cytosol. It appears to contribute to NADPH production under oxidative stress, and thereby to participate in redox signalling linked to defense responses	35 kDa	0.67	-0.311166	[]
Traes_4BL_4A4FAEBDC.3	ATP binding Source: UniProtKB-KW hydrolase activity	cell cycle Source: UniProtKB-KW cell division Source: UniProtKB-KW protein transport	pep:novel scaffold:IWGSC1.0+popseq:IWGSC_CSS_4BL_scaff_7006454:62:4248:1 gene:Traes_4BL_4A4FAEBDC transcript:Traes_4BL_4A4FAEBDC.3	84 kDa	0.67	0.668668	[]
Traes_6DL_1B9FBE0921.1	GTPase activity Source: InterPro GTP binding Source: UniProtKB-KW translation elongation factor activity		pep:novel chromosome:IWGSC1.0+popseq:6D:126578838:126582531:-1 gene:Traes_6DL_1B9FBE0921 transcript:Traes_6DL_1B9FBE0921.1 description:"RAB GTPase homolog E1B"	41 kDa	0.67	-0.0481533	[]
Traes_7DS_A9BD8001C.1	peroxidase activity Source: UniProtKB-KW peroxiredoxin activity	cell redox homeostasis	pep:known scaffold:IWGSC1.0+popseq:IWGSC_CSS_7DS_scaff_3919168:2262:5853:1 gene:Traes_7DS_A9BD8001C transcript:Traes_7DS_A9BD8001C.1 description:"Peroxiredoxin Q, chloroplastic "	23 kDa	0.67	-0.105399	[]
Traes_2AS_D23AA7200.1	carbohydrate binding	defense response to bacterium Source: TAIR stomatal closure	Ortholog: Encodes a nucleocytoplasmic lectin that is capable of binding carbohydrates. It is involved in ABA mediated stomatal movement and increased expression is correlated with increased resistance to Pseudomonas syringae	43 kDa	0.66	-0.0705327	[]
Traes_4BS_D4D9B5E3E.1	sucrose-phosphate synthase activity Source: TAIR sucrose synthase activity	sucrose biosynthetic process	pep:novel chromosome:IWGSC1.0+popseq:4B:231361311:231367355:-1 gene:Traes_4BS_D4D9B5E3E transcript:Traes_4BS_D4D9B5E3E.1 description:"Sucrose-phosphate synthase family protein"	116 kDa	0.66	-0.518115	[]
Traes_4DL_3D374FF4C.1	4 iron, 4 sulfur cluster binding Source: UniProtKB-KW aconitate hydratase activity Source: UniProtKB copper ion binding Source: TAIR mRNA 5'-UTR binding	citrate metabolic process Source: TAIR isocitrate metabolic process Source: TAIR response to iron ion starvation Source: UniProtKB response to salt stress Source: TAIR tricarboxylic acid cycle	Aconitase 1	85 kDa	0.66	-0.0829148	[]
Traes_5BS_FF89E832D.1	copper ion binding Source: TAIR DNA binding Source: UniProtKB magnesium ion binding Source: InterPro phosphopyruvate hydratase activity	glycolytic process Source: UniProtKB-UniPathway regulation of transcription, DNA-templated Source: UniProtKB-KW response to abscisic acid Source: TAIR response to cadmium ion Source: TAIR response to cold Source: TAIR response to light stimulus Source: TAIR response to salt stress Source: TAIR transcription, DNA-templated	pep:novel chromosome:IWGSC1.0+popseq:5B:3730403:3735286:1 gene:Traes_5BS_FF89E832D transcript:Traes_5BS_FF89E832D.1	48 kDa	0.66	-0.685247	[]
TRAES3BF046300160CFD_t1	3-hydroxyisobutyryl-CoA hydrolase activity	response to karrikin	pep:novel chromosome:IWGSC1.0+popseq:3B:507155916:507159650:-1 gene:TRAES3BF046300160CFD_g transcript:TRAES3BF046300160CFD_t1 description:"ATP-dependent caseinolytic (Clp) protease/crotonase family protein"	43 kDa	0.66	0.365188	[]
TRAES3BF151900060CFD_t1	translation initiation factor activity	regulation of translation Source: UniProtKB-KW response to virus	pep:novel scaffold:IWGSC1.0+popseq:v443_1519:131332:134712:1 gene:TRAES3BF151900060CFD_g transcript:TRAES3BF151900060CFD_t1 description:"Eukaryotic translation initiation factor 4E-1 "	24 kDa	0.66	0.372464	[]
Traes_2AL_85FCE950B.1	alanine-glyoxylate transaminase activity Source: TAIR glycine:2-oxoglutarate aminotransferase activity Source: TAIR L-alanine:2-oxoglutarate aminotransferase activity Source: TAIR pyridoxal phosphate binding	biosynthetic process Source: InterPro L-alanine catabolic process	Ortholog: Encodes a protein with glyoxylate aminotransferase activity. It can act on a number of different small substrates and amino acids in vitro	53 kDa	0.65	-0.0868288	[]
Traes_2AL_90299B16F.2	mRNA binding		pep:novel chromosome:IWGSC1.0+popseq:2A:85069135:85078068:1 gene:Traes_2AL_90299B16F transcript:Traes_2AL_90299B16F.2 description:"Nuclear transport factor 2 (NTF2) family protein with RNA binding (RRM-RBD-RNP motifs) domain"	64 kDa	0.65	1.10362	[]
Traes_2DL_9BDB78425.1	adenyl-nucleotide exchange factor activity Source: GO_Central chaperone binding Source: InterPro copper ion binding Source: TAIR protein homodimerization activity Source: InterPro unfolded protein binding	protein folding	pep:novel chromosome:IWGSC1.0+popseq:2D:112789493:112791350:-1 gene:Traes_2DL_9BDB78425 transcript:Traes_2DL_9BDB78425.1 description:"Co-chaperone GrpE family protein"	24 kDa	0.65	1.10367	[]
Traes_2DS_4A3C77BC3.2	chromatin binding Source: TAIR chromatin DNA binding Source: TAIR mRNA binding Source: TAIR nucleic acid binding Source: TAIR RNA binding Source: TAIR zinc ion binding	negative regulation of transcription, DNA-templated Source: TAIR positive regulation of mRNA splicing, via spliceosome Source: TAIR response to cold Source: TAIR response to water deprivation	pep:novel chromosome:IWGSC1.0+popseq:2D:127301507:127304843:-1 gene:Traes_2DS_4A3C77BC3 transcript:Traes_2DS_4A3C77BC3.2	32 kDa	0.65	1.10362	[]
Traes_3AS_5B7E5A95F.1	copper ion binding Source: TAIR cytochrome-b5 reductase activity, acting on NAD(P)H	response to salt stress	pep:novel scaffold:IWGSC1.0+popseq:IWGSC_CSS_3AS_scaff_452341:144:4219:1 gene:Traes_3AS_5B7E5A95F transcript:Traes_3AS_5B7E5A95F.1 description:"FAD/NAD(P)-binding oxidoreductase"	30 kDa	0.65	0.416309	[]
Traes_5AL_F2CB6CC02.1	copper ion binding Source: TAIR enoyl-[acyl-carrier-protein] reductase (NADH) activity Source: UniProtKB-EC enoyl-[acyl-carrier-protein] reductase activity	fatty acid biosynthetic process	pep:novel chromosome:IWGSC1.0+popseq:5A:6960504:6965922:1 gene:Traes_5AL_F2CB6CC02 transcript:Traes_5AL_F2CB6CC02.1	39 kDa	0.65	-0.188275	[]
Traes_5BL_4801ACF03.3	?	?	pep:novel chromosome:IWGSC1.0+popseq:5B:188388660:188392058:-1 gene:Traes_5BL_4801ACF03 transcript:Traes_5BL_4801ACF03.3	44 kDa	0.65	0.738513	[]
Traes_6AS_7468DD2B7.1 (+2)	chromatin binding Source: TAIR DNA binding Source: UniProtKB-KW protein heterodimerization activity		pep:known chromosome:IWGSC1.0+popseq:6A:6688584:6689546:1 gene:Traes_6AS_7468DD2B7 transcript:Traes_6AS_7468DD2B7.1 description:"Histone H2A.1 "	16 kDa	0.65	1.11785	[]
Traes_7DL_5F29AA8A8.1	ATP binding Source: UniProtKB-KW ATP-dependent peptidase activity Source: TAIR metal ion binding Source: UniProtKB-KW metalloendopeptidase activity Source: InterPro metallopeptidase activity	multicellular organism development Source: UniProtKB-KW photoinhibition Source: GO_Central photosystem II repair Source: TAIR proteolysis Source: GO_Central PSII associated light-harvesting complex II catabolic process	pep:novel chromosome:IWGSC1.0+popseq:7D:234592954:234596894:-1 gene:Traes_7DL_5F29AA8A8 transcript:Traes_7DL_5F29AA8A8.1	52 kDa	0.65	0.277161	[]
Traes_1AL_5558B7A4C.4 (+1)	?	?	Ortholog: thylakoid lumenal 17.4 kDa protein, chloroplast, identical to SP:P81760 Thylakoid lumenal 17.4 kDa protein, chloroplast precursor (P17.4) {Arabidopsis thaliana}. Putative pentapeptide protein	11 kDa	0.64	0.245136	[]
Traes_1AS_6AA4114A2.1	chromatin binding Source: TAIR DNA binding Source: UniProtKB-KW protein heterodimerization activity		pep:novel chromosome:IWGSC1.0+popseq:1A:6231703:6232599:1 gene:Traes_1AS_6AA4114A2 transcript:Traes_1AS_6AA4114A2.1 description:"Histone H2A.2.2 "	16 kDa	0.64	1.16777	[]
Traes_1DL_A91B639E3.1	copper ion binding Source: TAIR L-malate dehydrogenase activity	carbohydrate metabolic process Source: InterPro defense response to bacterium Source: TAIR malate metabolic process Source: InterPro response to cadmium ion Source: TAIR response to cold Source: TAIR response to salt stress Source: TAIR tricarboxylic acid cycle	pep:novel chromosome:IWGSC1.0+popseq:1D:128102035:128107037:-1 gene:Traes_1DL_A91B639E3 transcript:Traes_1DL_A91B639E3.1	24 kDa	0.64	-0.730226	[]
Traes_2AS_84EA9C609.1 (+1)	ribose-5-phosphate isomerase activity	defense response to bacterium Source: TAIR pentose-phosphate shunt, non-oxidative branch Source: InterPro reductive pentose-phosphate cycle Source: TAIR response to cytokinin	pep:novel scaffold:IWGSC1.0+popseq:IWGSC_CSS_2AS_scaff_5267598:7512:8750:-1 gene:Traes_2AS_84EA9C609 transcript:Traes_2AS_84EA9C609.1	22 kDa	0.64	-0.730167	[]
Traes_2DL_69EB061DB.1	adenosylhomocysteinase activity	one-carbon metabolic process	pep:novel scaffold:IWGSC1.0+popseq:IWGSC_CSS_2DL_scaff_9908867:1:2162:1 gene:Traes_2DL_69EB061DB transcript:Traes_2DL_69EB061DB.1	26 kDa	0.64	0.717693	[]
Traes_3AL_2849F0EF2.2	cytochrome-c oxidase activity Source: InterPro metal ion binding	mitochondrial ATP synthesis coupled proton transport Source: GO_Central mitochondrial electron transport, cytochrome c to oxygen	pep:novel scaffold:IWGSC1.0+popseq:IWGSC_CSS_3AL_scaff_4371326:3016:7413:-1 gene:Traes_3AL_2849F0EF2 transcript:Traes_3AL_2849F0EF2.2	12 kDa	0.64	0.0882853	[]
Traes_6AS_606F61E8B.1	catalytic activity Source: InterPro coenzyme binding Source: InterPro poly(U) RNA binding Source: TAIR rRNA binding	chloroplast organization Source: UniProtKB circadian rhythm Source: UniProtKB plastid translation Source: UniProtKB positive regulation of transcription, DNA-templated Source: UniProtKB positive regulation of translation Source: UniProtKB response to cytokinin Source: TAIR rRNA processing	Chloroplast stem-loop binding protein of 41 kDa	41 kDa	0.64	0.123867	[]
Traes_6AS_6EDAF3074.2	copper ion binding Source: TAIR L-aspartate:2-oxoglutarate aminotransferase activity Source: TAIR L-phenylalanine:2-oxoglutarate aminotransferase activity Source: UniProtKB-EC pyridoxal phosphate binding	2-oxoglutarate metabolic process Source: UniProtKB aspartate metabolic process Source: UniProtKB biosynthetic process Source: InterPro glutamate metabolic process Source: UniProtKB response to cadmium ion	pep:novel chromosome:IWGSC1.0+popseq:6A:2688427:2693175:1 gene:Traes_6AS_6EDAF3074 transcript:Traes_6AS_6EDAF3074.2	47 kDa	0.64	0.626752	[]
Traes_6AS_BAB9A28AB.2	methenyltetrahydrofolate cyclohydrolase activity Source: GO_Central methylenetetrahydrofolate dehydrogenase (NADP+) activity	one-carbon metabolic process Source: GO_Central photorespiration Source: UniProtKB-KW tetrahydrofolate interconversion	pep:novel scaffold:IWGSC1.0+popseq:IWGSC_CSS_6AS_scaff_2602052:2371:5024:-1 gene:Traes_6AS_BAB9A28AB transcript:Traes_6AS_BAB9A28AB.2	33 kDa	0.64	-0.730183	[]
Traes_6BS_6F8DEF103.1	calcium ion binding Source: InterPro carbohydrate binding Source: UniProtKB-KW unfolded protein binding	protein folding	pep:novel chromosome:IWGSC1.0+popseq:6B:35986570:35989560:-1 gene:Traes_6BS_6F8DEF103 transcript:Traes_6BS_6F8DEF103.1	58 kDa	0.64	-0.250573	[]
Traes_6DS_CDB16CE3F.1	ATP binding Source: UniProtKB-KW phosphoglycerate kinase activity Source: TAIR protein kinase activity	glycolytic process Source: TAIR response to glucose Source: UniProtKB response to heat Source: UniProtKB response to light stimulus Source: UniProtKB response to molecule of bacterial origin	pep:novel chromosome:IWGSC1.0+popseq:6D:53812731:53816155:-1 gene:Traes_6DS_CDB16CE3F transcript:Traes_6DS_CDB16CE3F.1 description:"Phosphoglycerate kinase, cytosolic "	42 kDa	0.64	-0.0498714	[]
Traes_6DS_F552896E4.1	hydroxymethylbilane synthase activity	chlorophyll biosynthetic process Source: TAIR chloroplast RNA modification Source: TAIR defense response to bacterium Source: TAIR heme biosynthetic process Source: GO_Central peptidyl-pyrromethane cofactor linkage Source: InterPro protoporphyrinogen IX biosynthetic process	Hydroxymethylbilane synthase	38 kDa	0.64	-0.541807	[]
Traes_7BL_C35CD97E7.1	porphobilinogen synthase activity Source: GO_Central zinc ion binding	chlorophyll biosynthetic process Source: UniProtKB-UniPathway heme biosynthetic process Source: GO_Central porphyrin-containing compound biosynthetic process Source: TAIR protoporphyrinogen IX biosynthetic process	pep:novel chromosome:IWGSC1.0+popseq:7B:206611056:206614829:-1 gene:Traes_7BL_C35CD97E7 transcript:Traes_7BL_C35CD97E7.1	33 kDa	0.64	-0.73706	[]
Traes_7DL_3BA7EF708.2	hydrogen-translocating pyrophosphatase activity Source: TAIR inorganic diphosphatase activity Source: UniProtKB-EC metal ion binding	auxin polar transport Source: TAIR establishment or maintenance of transmembrane electrochemical gradient Source: TAIR leaf development Source: TAIR proton transport Source: UniProtKB-KW response to salt stress Source: TAIR response to water deprivation	pep:novel chromosome:IWGSC1.0+popseq:7D:227232725:227235725:-1 gene:Traes_7DL_3BA7EF708 transcript:Traes_7DL_3BA7EF708.2 description:"Inorganic H pyrophosphatase family protein"	72 kDa	0.64	-0.247356	[]
Traes_2DL_1CB540BCC.3	chitinase activity Source: UniProtKB-EC chitin binding	cell wall macromolecule catabolic process Source: InterPro chitin catabolic process Source: UniProtKB-KW defense response Source: UniProtKB-KW polysaccharide catabolic process	Ortholog: Chitinase family protein; FUNCTIONS IN: chitin binding, chitinase activity; INVOLVED IN: carbohydrate metabolic process, cell wall macromolecule catabolic process	35 kDa	0.63	-0.91049	[]
Traes_4BL_D59FF84CA.1	chorismate synthase activity Source: GO_Central FMN binding	aromatic amino acid family biosynthetic process Source: UniProtKB-KW chorismate biosynthetic process	pep:novel scaffold:IWGSC1.0+popseq:IWGSC_CSS_4BL_scaff_6962160:584:4697:-1 gene:Traes_4BL_D59FF84CA transcript:Traes_4BL_D59FF84CA.1	47 kDa	0.63	-0.412005	[]
Traes_4DS_6B94D4FA6.1	hydrolase activity, hydrolyzing O-glycosyl compounds Source: InterPro xyloglucan:xyloglucosyl transferase activity	cell wall biogenesis Source: InterPro cell wall organization Source: UniProtKB-KW xyloglucan metabolic process	pep:known scaffold:IWGSC1.0+popseq:IWGSC_CSS_4DS_scaff_2325494:1982:4154:1 gene:Traes_4DS_6B94D4FA6 transcript:Traes_4DS_6B94D4FA6.1 description:"Probable xyloglucan endotransglucosylase/hydrolase "	33 kDa	0.63	-1.21828	[]
Traes_5BL_7873A9BC0.2	?	?	pep:novel chromosome:IWGSC1.0+popseq:5B:245789000:245791222:1 gene:Traes_5BL_7873A9BC0 transcript:Traes_5BL_7873A9BC0.2	48 kDa	0.63	-1.21828	[]
Traes_5BS_F8604D316.2	3-mercaptopyruvate sulfurtransferase activity Source: TAIR thiosulfate sulfurtransferase activity	embryo development ending in seed dormancy	Ortholog: encodes a cytoplasmic thiosulfate:cyanide sulfurtransferase, activity of which increased the rhodanese activity of transgenic yeast. Can also act as a mercaptopyruvate sulfurtransferase	30 kDa	0.63	-0.548749	[]
Traes_5DL_AC7C885A0.1	cysteine-type endopeptidase activity	immune response Source: GO_Central proteolysis involved in cellular protein catabolic process	Ortholog: Cysteine proteinases superfamily protein; FUNCTIONS IN: cysteine-type endopeptidase activity, cysteine-type peptidase activity; INVOLVED IN: proteolysis	24 kDa	0.63	-0.44188	[]
EPlTAEP00000010058	ATP binding Source: UniProtKB-KW protease binding Source: UniProtKB proton-transporting ATPase activity, rotational mechanism Source: GO_Central	ATP hydrolysis coupled proton transport Source: InterPro ATP metabolic process Source: InterPro Golgi organization Source: TAIR pollen development Source: TAIR response to salt stress Source: TAIR	ATP synthase subunit alpha, chloroplastic	55 kDa	0.62	0.0872266	[]
Traes_1DS_A23800206.1	heme binding Source: InterPro metal ion binding Source: UniProtKB-KW peroxidase activity	hydrogen peroxide catabolic process Source: InterPro plant-type cell wall organization Source: GO_Central response to oxidative stress	pep:novel chromosome:IWGSC1.0+popseq:1D:42333125:42337161:1 gene:Traes_1DS_A23800206 transcript:Traes_1DS_A23800206.1	37 kDa	0.62	0.348427	[]
Traes_2AS_70216F92B.1		granum assembly Source: TAIR intracellular protein transport Source: UniProtKB response to karrikin	pep:novel chromosome:IWGSC1.0+popseq:2A:188965197:188966363:-1 gene:Traes_2AS_70216F92B transcript:Traes_2AS_70216F92B.1 description:"Ankyrin repeat family protein"	19 kDa	0.62	0.770832	[]
Traes_2BS_62A407EAB.1	3 iron, 4 sulfur cluster binding Source: UniProtKB-KW glutamate synthase (ferredoxin) activity Source: TAIR metal ion binding	ammonia assimilation cycle Source: GO_Central glutamate biosynthetic process Source: GO_Central L-glutamate biosynthetic process Source: UniProtKB-UniPathway photorespiration Source: TAIR positive regulation of glycine hydroxymethyltransferase activity Source: TAIR response to light stimulus Source: UniProtKB response to sucrose	Ortholog: Encodes a gene whose sequence is similar to ferredoxin dependent glutamate synthase (Fd-GOGAT). Expression in leaves is induced by light and sucrose. Proposed to be involved in photorespiration and nitrogen assimilation	165 kDa	0.62	0.170309	[]
Traes_3DL_DFE5BD85A.1	calmodulin binding Source: TAIR thiol-dependent ubiquitinyl hydrolase activity	protein deubiquitination Source: TAIR ubiquitin-dependent protein catabolic process	Ortholog: Ubiquitin-specific protease 6 (UBP6). Deubiquinating enzyme. Interacts with calmodulin	28 kDa	0.62	-0.216037	[]
Traes_4AL_8BCE46958.1	ribonuclease activity Source: TAIR structural constituent of ribosome Source: CAFA threonine-type endopeptidase activity	proteasome-mediated ubiquitin-dependent protein catabolic process Source: InterPro response to cadmium ion	Ortholog: Encodes alpha5 subunit of 20s proteosome involved in protein degradation and RNA degradation	26 kDa	0.62	0.592074	[]
TRAES3BF039300010CFD_t1	glucan endo-1,3-beta-D-glucosidase activity Source: UniProtKB-EC hydrolase activity, hydrolyzing O-glycosyl compounds Source: GO_Central polysaccharide binding	carbohydrate metabolic process Source: InterPro defense response to fungus, incompatible interaction Source: TAIR defense response to nematode Source: TAIR response to salt stress	pep:novel chromosome:IWGSC1.0+popseq:3B:730917200:730918132:-1 gene:TRAES3BF039300010CFD_g transcript:TRAES3BF039300010CFD_t1	33 kDa	0.62	-0.753476	[]
TRAES3BF044300010CFD_t1	carbonate dehydratase activity Source: TAIR metal ion binding	photorespiration Source: TAIR protein homotrimerization	pep:novel chromosome:IWGSC1.0+popseq:3B:288392042:288415758:1 gene:TRAES3BF044300010CFD_g transcript:TRAES3BF044300010CFD_t1	28 kDa	0.62	-0.602186	[]
Traes_2AL_C51BB91CC.3	FMN binding Source: InterPro glycolate oxidase activity Source: TAIR long-chain-(S)-2-hydroxy-long-chain-acid oxidase activity Source: UniProtKB-EC medium-chain-(S)-2-hydroxy-acid oxidase activity Source: UniProtKB-EC very-long-chain-(S)-2-hydroxy-acid oxidase activity	defense response to bacterium Source: TAIR hydrogen peroxide biosynthetic process Source: TAIR oxidative photosynthetic carbon pathway Source: UniProtKB-UniPathway response to cytokinin	Ortholog: Encodes a glycolate oxidase that modulates reactive oxygen species-mediated signal transduction during nonhost resistance	40 kDa	0.61	-0.0785498	[]
Traes_2AS_34272605C.1 (+2)	GTPase activity Source: InterPro GTP binding Source: UniProtKB-KW structural constituent of cytoskeleton	microtubule-based process	Ortholog: Encodes an isoform of alpha tubulin. Closely related to adjacent gene TUA3 suggesting recent duplication	50 kDa	0.61	0.10593	[]
Traes_2BL_CA7D819C8.1	DNA binding Source: UniProtKB-KW protein heterodimerization activity		pep:novel scaffold:IWGSC1.0+popseq:IWGSC_CSS_2BL_scaff_7991591:1624:2553:1 gene:Traes_2BL_CA7D819C8 transcript:Traes_2BL_CA7D819C8.1	16 kDa	0.61	0.122572	[]
Traes_4AS_8F8B908D3.1 (+2)	structural constituent of ribosome	endonucleolytic cleavage in ITS1 to separate SSU-rRNA from 5.8S rRNA and LSU-rRNA from tricistronic rRNA transcript (SSU-rRNA, 5.8S rRNA, LSU-rRNA) Source: GO_Central endonucleolytic cleavage to generate mature 3'-end of SSU-rRNA from (SSU-rRNA, 5.8S rRNA, LSU-rRNA) Source: GO_Central ribosomal small subunit assembly Source: GO_Central rRNA export from nucleus Source: GO_Central translation	pep:novel scaffold:IWGSC1.0+popseq:IWGSC_CSS_4AS_scaff_5995103:6752:8928:1 gene:Traes_4AS_8F8B908D3 transcript:Traes_4AS_8F8B908D3.1	33 kDa	0.61	-0.801617	[]
Traes_4DL_5B7C0F2FC.2	argininosuccinate lyase activity	arginine biosynthetic process via ornithine	pep:novel chromosome:IWGSC1.0+popseq:4D:80823732:80830075:-1 gene:Traes_4DL_5B7C0F2FC transcript:Traes_4DL_5B7C0F2FC.2 description:"L-Aspartase-like family protein"	57 kDa	0.61	-1.32235	[]
Traes_4DL_8DED0B0C8.1	metalloendopeptidase activity Source: GO_Central oxidoreductase activity Source: UniProtKB-KW zinc ion binding	aerobic respiration Source: GO_Central mitochondrial electron transport, ubiquinol to cytochrome c Source: GO_Central protein processing	pep:novel scaffold:IWGSC1.0+popseq:IWGSC_CSS_4DL_scaff_14352871:1:4017:1 gene:Traes_4DL_8DED0B0C8 transcript:Traes_4DL_8DED0B0C8.1 description:"Insulinase (Peptidase family M16) protein"	43 kDa	0.61	-0.143147	[]
Traes_6DL_3E8CC7CF1.2	Hsp90 protein binding Source: UniProtKB preprotein binding	chaperone-mediated protein complex assembly	pep:novel chromosome:IWGSC1.0+popseq:6D:98742338:98749418:-1 gene:Traes_6DL_3E8CC7CF1 transcript:Traes_6DL_3E8CC7CF1.2	51 kDa	0.61	0.195923	[]
Traes_7DL_D99ED7064.1	heme binding Source: InterPro metal ion binding Source: UniProtKB-KW peroxidase activity	hydrogen peroxide catabolic process Source: UniProtKB-KW response to oxidative stress Source: InterPro response to salt stress Source: TAIR response to zinc ion	pep:novel chromosome:IWGSC1.0+popseq:7D:196346029:196347835:1 gene:Traes_7DL_D99ED7064 transcript:Traes_7DL_D99ED7064.1	38 kDa	0.61	-0.687011	[]
TRAES3BF004400050CFD_t1 (+3)		plant-type cell wall organization Source: InterPro syncytium formation	pep:novel chromosome:IWGSC1.0+popseq:3B:582612532:582613671:-1 gene:TRAES3BF004400050CFD_g transcript:TRAES3BF004400050CFD_t1	26 kDa	0.61	1.32606	[]
Traes_3DL_4B8AB34A9.1	GTPase activity Source: InterPro GTP binding	ER to Golgi vesicle-mediated transport Source: TAIR protein transport Source: UniProtKB-KW response to cadmium ion	Ortholog: Belongs to the Rab1 GTPase subfamily. This small GTP-binding protein is required in ER to Golgi transportation	31 kDa	0.6	-0.443031	[]
Traes_4AL_9D10E6490.2 (+4)	RNA binding Source: GO_Central structural constituent of ribosome	maturation of SSU-rRNA from tricistronic rRNA transcript (SSU-rRNA, 5.8S rRNA, LSU-rRNA) Source: GO_Central translation	pep:novel chromosome:IWGSC1.0+popseq:4A:101714180:101718481:1 gene:Traes_4AL_9D10E6490 transcript:Traes_4AL_9D10E6490.2	17 kDa	0.6	-0.300676	[]
Traes_4BS_9E3DC85E4.1	?	?	unknown protein	10 kDa	0.6	1.34019	[]
Traes_4DS_D97A96AE5.2	5-methyltetrahydropteroyltriglutamate-homocysteine S-methyltransferase activity Source: GO_Central copper ion binding Source: TAIR methionine synthase activity Source: TAIR zinc ion binding	homocysteine metabolic process Source: GO_Central response to cadmium ion Source: TAIR response to salt stress Source: TAIR response to zinc ion	pep:novel scaffold:IWGSC1.0+popseq:IWGSC_CSS_4DS_scaff_1477646:1:5878:1 gene:Traes_4DS_D97A96AE5 transcript:Traes_4DS_D97A96AE5.2	84 kDa	0.6	-0.173332	[]
Traes_5BL_88E594FCF.1	ATP binding Source: UniProtKB-KW protease binding	defense response to bacterium Source: UniProtKB defense response to fungus Source: UniProtKB defense response to other organism Source: TAIR negative regulation of seed germination Source: TAIR regulation of transcription, DNA-templated Source: UniProtKB-KW response to cadmium ion Source: TAIR response to cold Source: TAIR response to heat Source: UniProtKB response to virus Source: TAIR stomatal…	pep:novel scaffold:IWGSC1.0+popseq:IWGSC_CSS_5BL_scaff_10874641:3048:8099:-1 gene:Traes_5BL_88E594FCF transcript:Traes_5BL_88E594FCF.1	71 kDa	0.6	0.0815885	[]
Traes_5DS_81917280C.1	ATP binding Source: UniProtKB-KW ATP-dependent peptidase activity	chloroplast organization Source: TAIR protein import into chloroplast stroma Source: TAIR protein targeting to chloroplast Source: TAIR regulation of chlorophyll biosynthetic process Source: TAIR response to cytokinin	pep:novel scaffold:IWGSC1.0+popseq:IWGSC_CSS_5DS_scaff_2768592:2968:7688:1 gene:Traes_5DS_81917280C transcript:Traes_5DS_81917280C.1	82 kDa	0.6	-0.12695	[]
Traes_7AL_A761447C9.2 (+1)	ATP binding Source: UniProtKB-KW ATP-dependent RNA helicase activity Source: GO_Central mRNA binding Source: TAIR translation initiation factor activity	regulation of gene expression Source: GO_Central response to cadmium ion Source: TAIR RNA secondary structure unwinding Source: GO_Central translational initiation	pep:novel chromosome:IWGSC1.0+popseq:7A:139330372:139333245:-1 gene:Traes_7AL_A761447C9 transcript:Traes_7AL_A761447C9.2	47 kDa	0.6	-0.069695	[]
Traes_7BL_F7E745685.2	iron ion binding		pep:novel scaffold:IWGSC1.0+popseq:IWGSC_CSS_7BL_scaff_6568395:2:982:1 gene:Traes_7BL_F7E745685 transcript:Traes_7BL_F7E745685.2	15 kDa	0.6	-0.422683	[]
Traes_2DL_8A52AFA08.2		response to abscisic acid Source: TAIR response to cadmium ion	Ortholog: FUNCTIONS IN: molecular_function unknown; INVOLVED IN: response to cadmium ion	201 kDa	0.59	0.515743	[]
Traes_3AL_7C8EF9125.1	cellulase activity Source: TAIR glucan endo-1,3-beta-D-glucosidase activity Source: UniProtKB-EC glucan exo-1,3-beta-glucosidase activity Source: TAIR polysaccharide binding	carbohydrate metabolic process Source: InterPro response to cold Source: TAIR systemic acquired resistance	pep:novel chromosome:IWGSC1.0+popseq:3A:176088221:176089096:-1 gene:Traes_3AL_7C8EF9125 transcript:Traes_3AL_7C8EF9125.1	21 kDa	0.59	0.63458	[]
Traes_4AL_6B5C89E7C.1 (+2)	ATP binding Source: TAIR protein domain specific binding	cellular response to nitrogen starvation Source: UniProtKB cellular response to phosphate starvation Source: UniProtKB cellular response to potassium ion starvation Source: UniProtKB cold acclimation Source: UniProtKB ethylene-activated signaling pathway Source: UniProtKB-KW regulation of metabolic process Source: UniProtKB response to cold Source: UniProtKB response to freezing	Ortholog: general regulatory factor, a 14-3-3 gene	29 kDa	0.59	0.0764975	[]
Traes_4AS_DE6DD58CC.1	carbohydrate binding Source: InterPro catalytic activity	carbohydrate metabolic process Source: InterPro photosynthetic electron transport in photosystem I	Ortholog: NDH-dependent cyclic electron flow 1	38 kDa	0.59	-0.398212	[]
Traes_4BL_16D361B93.1		embryo development ending in seed dormancy	pep:novel chromosome:IWGSC1.0+popseq:4B:266797726:266800040:1 gene:Traes_4BL_16D361B93 transcript:Traes_4BL_16D361B93.1	18 kDa	0.59	0.627876	[]
Traes_4BS_23B0029CF.1	N-acyltransferase activity		pep:novel chromosome:IWGSC1.0+popseq:4B:438696:440730:1 gene:Traes_4BS_23B0029CF transcript:Traes_4BS_23B0029CF.1	45 kDa	0.59	1.43975	[]
Traes_4DL_A6F0CFF85.1	ATPase-coupled arsenite transmembrane transporter activity Source: TAIR cadmium ion binding Source: TAIR copper ion binding Source: TAIR glutathione gamma-glutamylcysteinyltransferase activity	arsenite transport Source: TAIR defense response by callose deposition in cell wall Source: TAIR defense response to bacterium Source: TAIR indole glucosinolate catabolic process Source: TAIR phytochelatin biosynthetic process Source: TAIR response to arsenic-containing substance Source: TAIR response to cadmium ion	Ortholog: Phytochelatin synthase gene confers tolerance to cadmium ions. Catalyzes phytochelatin (PC) synthesis from glutathione (GSH) in the presence of Cd2+, Zn2+, Cu2+ and Fe3+, but not by Co2+ or Ni2+	53 kDa	0.59	-0.844208	[]
Traes_4DL_CDDD5E13E.1	adenylosuccinate synthase activity Source: UniProtKB-EC GTP binding Source: UniProtKB-KW metal ion binding	de novo' AMP biosynthetic process Source: GO_Central IMP metabolic process Source: GO_Central response to cadmium ion	pep:novel chromosome:IWGSC1.0+popseq:4D:111973906:111977148:1 gene:Traes_4DL_CDDD5E13E transcript:Traes_4DL_CDDD5E13E.1 description:"Adenylosuccinate synthetase, chloroplastic"	49 kDa	0.59	1.42557	[]
Traes_5BL_044AAF401.1	protein domain specific binding	photosynthesis Source: UniProtKB-KW response to cytokinin	pep:novel chromosome:IWGSC1.0+popseq:5B:260079320:260080453:-1 gene:Traes_5BL_044AAF401 transcript:Traes_5BL_044AAF401.1	16 kDa	0.59	0.151638	[]
Traes_5DL_FBCE5007F.1	2-isopropylmalate synthase activity Source: TAIR lyase activity	leucine biosynthetic process	pep:novel scaffold:IWGSC1.0+popseq:IWGSC_CSS_5DL_scaff_4561337:2732:8189:-1 gene:Traes_5DL_FBCE5007F transcript:Traes_5DL_FBCE5007F.1	67 kDa	0.59	0.706222	[]
Traes_6AL_00EDAC7DB.1 (+1)	water channel activity	ion transmembrane transport Source: GO_Central response to water deprivation Source: TAIR water transport	pep:novel chromosome:IWGSC1.0+popseq:6A:205082152:205083196:1 gene:Traes_6AL_00EDAC7DB transcript:Traes_6AL_00EDAC7DB.1	28 kDa	0.59	0.842351	[]
Traes_6AS_D49C93E84.1	heme binding Source: InterPro metal ion binding Source: UniProtKB-KW peroxidase activity	hydrogen peroxide catabolic process Source: UniProtKB-KW response to oxidative stress	Peroxidase superfamily protein; FUNCTIONS IN: peroxidase activity, heme binding; INVOLVED IN: response to oxidative stress, oxidation reduction; LOCATED IN: endomembrane system	7 kDa	0.59	0.889195	[]
Traes_6AS_D49E14BD2.2		response to cytokinin	pep:novel scaffold:IWGSC1.0+popseq:IWGSC_CSS_6AS_scaff_4423281:1621:4894:1 gene:Traes_6AS_D49E14BD2 transcript:Traes_6AS_D49E14BD2.2 description:"Low PSII Accumulation 3"	41 kDa	0.59	0.440164	[]
TRAES3BF067800160CFD_t1	cysteine synthase activity Source: TAIR pyridoxal phosphate binding	cysteine biosynthetic process Source: TAIR cysteine biosynthetic process from serine Source: GO_Central double fertilization forming a zygote and endosperm Source: TAIR pollen tube growth Source: TAIR response to cadmium ion Source: TAIR response to cytokinin	pep:novel chromosome:IWGSC1.0+popseq:3B:73356075:73359257:1 gene:TRAES3BF067800160CFD_g transcript:TRAES3BF067800160CFD_t1	41 kDa	0.59	0.0906772	[]
Traes_1AL_4F3CAE982.2	proton-exporting ATPase activity, phosphorylative mechanism	ATP hydrolysis coupled proton transport Source: InterPro unidimensional cell growth	pep:novel chromosome:IWGSC1.0+popseq:1A:247743620:247747207:-1 gene:Traes_1AL_4F3CAE982 transcript:Traes_1AL_4F3CAE982.2	39 kDa	0.58	-0.432926	[]
Traes_1AL_E195290EF.2 (+2)	ATP binding Source: UniProtKB-KW structural constituent of cytoskeleton	cell division Source: TAIR response to auxin Source: TAIR response to light stimulus Source: TAIR response to wounding Source: TAIR root development Source: TAIR root epidermal cell differentiation Source: TAIR root hair elongation Source: TAIR seed germination	pep:novel scaffold:IWGSC1.0+popseq:IWGSC_CSS_1AL_scaff_3840888:5606:6973:-1 gene:Traes_1AL_E195290EF transcript:Traes_1AL_E195290EF.2	44 kDa	0.58	0.0906676	[]
Traes_1DS_812AFD33F.1	hydrolase activity	lipid metabolic process	pep:novel chromosome:IWGSC1.0+popseq:1D:65696549:65700059:1 gene:Traes_1DS_812AFD33F transcript:Traes_1DS_812AFD33F.1	46 kDa	0.58	1.48214	[]
Traes_2BS_2B59EDA36.1	metal ion binding	defense response to bacterium Source: TAIR defense response to fungus	pep:novel chromosome:IWGSC1.0+popseq:2B:4929450:4931123:-1 gene:Traes_2BS_2B59EDA36 transcript:Traes_2BS_2B59EDA36.1	22 kDa	0.58	-0.938437	[]
Traes_3AL_A6B2629B5.2	ceramidase activity	sphingolipid metabolic process	pep:novel scaffold:IWGSC1.0+popseq:IWGSC_CSS_3AL_scaff_4450714:274:7557:-1 gene:Traes_3AL_A6B2629B5 transcript:Traes_3AL_A6B2629B5.2	90 kDa	0.58	0.689102	[]
Traes_4AL_2ED1412A1.1		chloroplast RNA modification Source: TAIR mitochondrial RNA modification Source: TAIR mRNA processing	pep:novel chromosome:IWGSC1.0+popseq:4A:126138962:126142888:-1 gene:Traes_4AL_2ED1412A1 transcript:Traes_4AL_2ED1412A1.1	44 kDa	0.58	-0.891069	[]
Traes_4AS_4B236E907.2 (+1)	structural constituent of ribosome	endonucleolytic cleavage in ITS1 to separate SSU-rRNA from 5.8S rRNA and LSU-rRNA from tricistronic rRNA transcript (SSU-rRNA, 5.8S rRNA, LSU-rRNA) Source: GO_Central endonucleolytic cleavage to generate mature 3'-end of SSU-rRNA from (SSU-rRNA, 5.8S rRNA, LSU-rRNA) Source: GO_Central translation	pep:novel chromosome:IWGSC1.0+popseq:4A:82790882:82792483:-1 gene:Traes_4AS_4B236E907 transcript:Traes_4AS_4B236E907.2	9 kDa	0.58	-0.183504	[]
Traes_6AS_FAFAAFD12.2 (+1)	GTPase activity Source: InterPro GTP binding Source: UniProtKB-KW mRNA binding Source: TAIR structural constituent of cytoskeleton	microtubule-based process Source: InterPro response to cadmium ion	pep:known chromosome:IWGSC1.0+popseq:6A:159656128:159659168:1 gene:Traes_6AS_FAFAAFD12 transcript:Traes_6AS_FAFAAFD12.2 description:"Tubulin beta-3 chain"	50 kDa	0.58	0.107002	[]
Traes_7AS_7D66EF3D3.2 (+1)	phosphogluconate dehydrogenase (decarboxylating) activity	D-gluconate metabolic process Source: UniProtKB-KW male-female gamete recognition during double fertilization forming a zygote and endosperm Source: TAIR pentose-phosphate shunt Source: UniProtKB-UniPathway response to salt stress	pep:novel scaffold:IWGSC1.0+popseq:IWGSC_CSS_7AS_scaff_4191334:1322:3292:-1 gene:Traes_7AS_7D66EF3D3 transcript:Traes_7AS_7D66EF3D3.2	53 kDa	0.58	0.232813	[]
Traes_7BL_4F404081A.1 (+1)		response to cold Source: TAIR response to cytokinin Source: TAIR response to light stimulus Source: TAIR response to sucrose	Uridylyltransferase-related	27 kDa	0.58	-0.159587	[]
TRAES3BF011300020CFD_t1	glyoxalase III activity		pep:novel chromosome:IWGSC1.0+popseq:3B:164703941:164716136:1 gene:TRAES3BF011300020CFD_g transcript:TRAES3BF011300020CFD_t1	77 kDa	0.58	0.757898	[]
EPlTAEP00000010092	ATPase binding Source: GO_Central proton-transporting ATPase activity, rotational mechanism Source: GO_Central	ATP hydrolysis coupled proton transport Source: InterPro ATP synthesis coupled proton transport Source: GO_Central proton-transporting V-type ATPase complex assembly Source: UniProtKB vacuolar acidification Source: GO_Central vacuolar proton-transporting V-type ATPase complex assembly Source: GO_Central	pep:known chromosome:IWGSC1.0+popseq:Mt:6832:8361:1 gene:EPlTAEG00000010126 transcript:EPlTAET00000010126 description:"ATP synthase subunit alpha, mitochondrial "	55 kDa	0.57	0.112484	[]
Traes_1AL_EF31F706D.1	indole-3-glycerol-phosphate lyase activity Source: UniProtKB tryptophan synthase activity	auxin biosynthetic process	pep:novel scaffold:IWGSC1.0+popseq:IWGSC_CSS_1AL_scaff_3894190:3053:6461:1 gene:Traes_1AL_EF31F706D transcript:Traes_1AL_EF31F706D.1	34 kDa	0.57	1.5187	[]
Traes_2AL_16CF7A3BA.1 (+1)	mRNA binding Source: TAIR structural constituent of ribosome	cytoplasmic translation	Ortholog: Ribosomal protein S10p/S20e family protein; FUNCTIONS IN: structural constituent of ribosome, RNA binding; INVOLVED IN: translation	14 kDa	0.57	0.10043	[]
Traes_2BS_C7E82EE7A.1		chlorophyll catabolic process Source: CACAO photosystem II assembly Source: TAIR positive regulation of stomatal opening Source: TAIR protein import into chloroplast stroma Source: TAIR protein import into chloroplast thylakoid membrane Source: TAIR regulation of reactive oxygen species biosynthetic process Source: TAIR regulation of response to water deprivation Source: TAIR sugar mediated signa…	Photosystem II reaction center PSB29 protein	32 kDa	0.57	0.415997	[]
Traes_3AL_49B41071A.1	mRNA binding Source: TAIR RNA binding Source: GO_Central structural constituent of ribosome	ribosomal small subunit assembly	Ortholog: RNA binding Plectin/S10 domain-containing protein; FUNCTIONS IN: structural constituent of ribosome; INVOLVED IN: translation	14 kDa	0.57	-0.174618	[]
Traes_3B_9F3320C78.1	glucan endo-1,3-beta-D-glucosidase activity Source: UniProtKB-EC hydrolase activity, hydrolyzing O-glycosyl compounds Source: GO_Central polysaccharide binding	carbohydrate metabolic process Source: InterPro defense response to fungus, incompatible interaction Source: TAIR defense response to nematode Source: TAIR response to salt stress	pep:novel scaffold:IWGSC1.0+popseq:IWGSC_CSS_3B_scaff_10670501:1128:2882:-1 gene:Traes_3B_9F3320C78 transcript:Traes_3B_9F3320C78.1	34 kDa	0.57	-0.886178	[]
Traes_4DL_31D6228F5.1	poly(U) RNA binding Source: TAIR rRNA binding Source: UniProtKB-KW structural constituent of ribosome	translation	Ribosomal protein L4	34 kDa	0.57	0.228289	[]
Traes_5BL_D70B77649.3	FMN binding Source: InterPro long-chain-(S)-2-hydroxy-long-chain-acid oxidase activity Source: UniProtKB-EC medium-chain-(S)-2-hydroxy-acid oxidase activity Source: UniProtKB-EC very-long-chain-(S)-2-hydroxy-acid oxidase activity	oxidative photosynthetic carbon pathway	Ortholog: Encodes a glycolate oxidase that modulates reactive oxygen species-mediated signal transduction during nonhost resistance	40 kDa	0.57	0.131734	[]
Traes_7AL_CA3D296A7.1		photosystem II repair Source: TAIR response to cytokinin	pep:novel chromosome:IWGSC1.0+popseq:7A:136746513:136748377:1 gene:Traes_7AL_CA3D296A7 transcript:Traes_7AL_CA3D296A7.1	15 kDa	0.57	-0.177216	[]
Traes_7BS_108EC7F0D.1	electron transporter, transferring electrons from CoQH2-cytochrome c reductase complex and cytochrome c oxidase complex activity Source: GO_Central electron transporter, transferring electrons within CoQH2-cytochrome c reductase complex activity Source: GO_Central heme binding Source: InterPro metal ion binding	mitochondrial ATP synthesis coupled proton transport Source: GO_Central mitochondrial electron transport, ubiquinol to cytochrome c	pep:novel chromosome:IWGSC1.0+popseq:7B:78252848:78255817:-1 gene:Traes_7BS_108EC7F0D transcript:Traes_7BS_108EC7F0D.1	34 kDa	0.57	-0.341345	[]
Traes_7DL_DBBA5FD6C.1	serine-type endopeptidase activity Source: InterPro serine-type exopeptidase activity		Ortholog: Prolyl oligopeptidase family protein; FUNCTIONS IN: serine-type peptidase activity, serine-type endopeptidase activity; INVOLVED IN: proteolysis	54 kDa	0.57	0.435714	[]
TRAES3BF007900030CFD_t1	MAP-kinase scaffold activity Source: UniProtKB signal transducer activity	cellular response to abscisic acid stimulus Source: TAIR positive regulation of signal transduction Source: UniProtKB root development Source: TAIR seed germination Source: TAIR shoot system development	Ortholog: Encodes a protein with similarity to mammalian RACKs. RACKs function to shuttle activated protein kinase C to different subcellular sites and may also function as a scaffold through physical interactions with other proteins	36 kDa	0.57	-0.279589	[]
TRAES3BF060500130CFD_t1 (+2)	peptidyl-prolyl cis-trans isomerase activity		Ortholog: Cyclophilin-like peptidyl-prolyl cis-trans isomerase family protein; FUNCTIONS IN: peptidyl-prolyl cis-trans isomerase activity; INVOLVED IN: protein folding	30 kDa	0.57	1.50097	[]
TRAES3BF111600200CFD_t1	carboxy-lyase activity Source: UniProtKB-KW magnesium ion binding Source: InterPro thiamine pyrophosphate binding		pep:novel chromosome:IWGSC1.0+popseq:3B:128213771:128218120:-1 gene:TRAES3BF111600200CFD_g transcript:TRAES3BF111600200CFD_t1 description:"Thiamine pyrophosphate dependent pyruvate decarboxylase family protein"	60 kDa	0.57	1.5187	[]
TRAES3BF171700060CFD_t1	actin filament binding	actin filament depolymerization Source: GO_Central positive regulation of actin filament depolymerization	pep:novel chromosome:IWGSC1.0+popseq:3B:23561709:23566344:1 gene:TRAES3BF171700060CFD_g transcript:TRAES3BF171700060CFD_t1	66 kDa	0.57	0.19407	[]
Traes_1AS_A053EC112.1	glutathione binding Source: TAIR glutathione dehydrogenase (ascorbate) activity Source: TAIR glutathione transferase activity	glutathione metabolic process Source: GO_Central positive regulation of salicylic acid mediated signaling pathway Source: TAIR protein glutathionylation	pep:novel chromosome:IWGSC1.0+popseq:1A:4512780:4517093:1 gene:Traes_1AS_A053EC112 transcript:Traes_1AS_A053EC112.1	34 kDa	0.56	0.17134	[]
Traes_2AS_BD2A53CC4.1 (+3)	GTPase activity Source: GO_Central GTP binding Source: UniProtKB-KW translation elongation factor activity	response to cadmium ion	pep:known chromosome:IWGSC1.0+popseq:2A:143540250:143542301:1 gene:Traes_2AS_BD2A53CC4 transcript:Traes_2AS_BD2A53CC4.1 description:"Elongation factor 1-alpha "	50 kDa	0.56	0.150576	[]
Traes_2BL_185ED969B.1	glycine hydroxymethyltransferase activity Source: UniProtKB-EC pyridoxal phosphate binding	circadian rhythm Source: UniProtKB glycine biosynthetic process from serine Source: InterPro response to cadmium ion Source: TAIR tetrahydrofolate interconversion	pep:novel chromosome:IWGSC1.0+popseq:2B:314042550:314045474:-1 gene:Traes_2BL_185ED969B transcript:Traes_2BL_185ED969B.1	38 kDa	0.56	-0.143017	[]
Traes_4AS_60155447D.2	carboxy-lyase activity Source: GO_Central magnesium ion binding Source: InterPro pyruvate decarboxylase activity Source: UniProtKB-EC thiamine pyrophosphate binding	response to anoxia	pep:novel chromosome:IWGSC1.0+popseq:4A:68124932:68128014:-1 gene:Traes_4AS_60155447D transcript:Traes_4AS_60155447D.2	65 kDa	0.56	-0.94012	[]
Traes_6AL_24A5FC5D9.1 (+2)	ATP binding Source: TAIR copper ion binding Source: TAIR succinate-CoA ligase (ADP-forming) activity	response to cadmium ion Source: TAIR tricarboxylic acid cycle	pep:novel scaffold:IWGSC1.0+popseq:IWGSC_CSS_6AL_scaff_5787138:3891:5935:1 gene:Traes_6AL_24A5FC5D9 transcript:Traes_6AL_24A5FC5D9.1	20 kDa	0.56	0.166529	[]
Traes_6AL_5537AC81D.1	inorganic diphosphatase activity Source: UniProtKB magnesium ion binding	defense response to bacterium Source: TAIR phosphate-containing compound metabolic process Source: InterPro response to cadmium ion Source: TAIR response to salt stress	pep:novel scaffold:IWGSC1.0+popseq:IWGSC_CSS_6AL_scaff_5817521:179:5926:-1 gene:Traes_6AL_5537AC81D transcript:Traes_6AL_5537AC81D.1 description:"pyrophosphorylase 6"	32 kDa	0.56	0.177599	[]
Traes_7DS_659C88744.1		nucleosome assembly	Ortholog: This gene is predicted to encode a nucleosome assembly protein. Plant lines expressing an RNAi construct directed against this gene show a reduction in agrobacterium-mediated root transformation	42 kDa	0.56	0.45649	[]
TRAES3BF093000020CFD_t1	ATP binding Source: UniProtKB-KW copper ion binding Source: TAIR methionine adenosyltransferase activity	cellular response to iron ion Source: TAIR one-carbon metabolic process Source: UniProtKB-KW response to cytokinin Source: TAIR S-adenosylmethionine biosynthetic process	pep:novel chromosome:IWGSC1.0+popseq:3B:325761689:325762873:1 gene:TRAES3BF093000020CFD_g transcript:TRAES3BF093000020CFD_t1	43 kDa	0.56	-0.310121	[]
Traes_1AS_45DF41500.1 (+12)	ATP binding Source: UniProtKB-KW proton-transporting ATP synthase activity, rotational mechanism Source: InterPro zinc ion binding	ATP synthesis coupled proton transport Source: InterPro defense response to fungus, incompatible interaction Source: TAIR response to cold	ATP synthase subunit beta, chloroplastic	54 kDa	0.55	0.0869434	[]
Traes_2AS_BEC9B768B.1	3-deoxy-7-phosphoheptulonate synthase activity	aromatic amino acid family biosynthetic process Source: UniProtKB-KW chorismate biosynthetic process	pep:novel chromosome:IWGSC1.0+popseq:2A:167189564:167192350:1 gene:Traes_2AS_BEC9B768B transcript:Traes_2AS_BEC9B768B.1	39 kDa	0.55	0.241096	[]
Traes_2BS_8FF7A4DD7.1	hydrolase activity Source: InterPro isopentenyl-diphosphate delta-isomerase activity Source: UniProtKB-EC metal ion binding	chlorophyll biosynthetic process Source: UniProtKB-UniPathway dimethylallyl diphosphate biosynthetic process Source: UniProtKB-UniPathway flower development Source: TAIR isopentenyl diphosphate biosynthetic process Source: GO_Central photosynthesis	pep:novel chromosome:IWGSC1.0+popseq:2B:132721246:132725862:-1 gene:Traes_2BS_8FF7A4DD7 transcript:Traes_2BS_8FF7A4DD7.1	31 kDa	0.55	-0.768175	[]
Traes_4BS_EC229E33E.1	2 iron, 2 sulfur cluster binding Source: UniProtKB-KW 4 iron, 4 sulfur cluster binding Source: UniProtKB-KW electron transfer activity Source: InterPro iron-sulfur cluster binding Source: GO_Central metal ion binding Source: UniProtKB-KW NADH dehydrogenase (ubiquinone) activity	ATP synthesis coupled electron transport Source: InterPro cellular respiration Source: GO_Central photorespiration Source: TAIR response to oxidative stress	pep:novel chromosome:IWGSC1.0+popseq:4B:11578220:11583861:1 gene:Traes_4BS_EC229E33E transcript:Traes_4BS_EC229E33E.1	66 kDa	0.55	-0.209381	[]
Traes_5AL_AD0034878.1 (+3)	copper ion binding Source: TAIR monooxygenase activity Source: UniProtKB-KW ribulose-bisphosphate carboxylase activity	chloroplast ribulose bisphosphate carboxylase complex biogenesis Source: TAIR photorespiration Source: UniProtKB-KW photosynthesis Source: TAIR reductive pentose-phosphate cycle Source: UniProtKB-KW response to blue light Source: TAIR response to cold Source: TAIR response to far red light Source: TAIR response to red light	Ribulose bisphosphate carboxylase small chain clone 512	19 kDa	0.55	0.162993	[]
Traes_6AL_CE31DD2CE.1 (+1)	ATP binding Source: UniProtKB-KW proteasome-activating ATPase activity Source: GO_Central TBP-class protein binding	positive regulation of RNA polymerase II transcriptional preinitiation complex assembly Source: GO_Central ubiquitin-dependent ERAD pathway	pep:novel chromosome:IWGSC1.0+popseq:6A:196454993:196458953:-1 gene:Traes_6AL_CE31DD2CE transcript:Traes_6AL_CE31DD2CE.1	48 kDa	0.55	0.413527	[]
Traes_6AS_FEB8AED13.1	ATP binding	glycine decarboxylation via glycine cleavage system	pep:novel scaffold:IWGSC1.0+popseq:IWGSC_CSS_6AS_scaff_4419286:5077:7346:1 gene:Traes_6AS_FEB8AED13 transcript:Traes_6AS_FEB8AED13.1	28 kDa	0.55	0.928127	[]
Traes_7AL_EA1DE71E6.1	ATP binding Source: UniProtKB-KW proteasome-activating ATPase activity Source: GO_Central TBP-class protein binding	positive regulation of RNA polymerase II transcriptional preinitiation complex assembly Source: GO_Central ubiquitin-dependent ERAD pathway	Ortholog: 26S proteasome AAA-ATPase subunit RPT4a (RPT4a) mRNA	50 kDa	0.55	-0.256999	[]
Traes_7AS_2742DDF6C.2	sucrose synthase activity	response to hypoxia Source: UniProtKB sucrose metabolic process	pep:novel chromosome:IWGSC1.0+popseq:7A:28310684:28315990:-1 gene:Traes_7AS_2742DDF6C transcript:Traes_7AS_2742DDF6C.2	93 kDa	0.55	-0.169586	[]
Traes_7BS_E4E44F1371.2	nucleosomal DNA binding Source: GO_Central protein heterodimerization activity	nucleosome assembly	pep:novel scaffold:IWGSC1.0+popseq:IWGSC_CSS_7BS_scaff_3098872:4129:4530:-1 gene:Traes_7BS_E4E44F1371 transcript:Traes_7BS_E4E44F1371.2	13 kDa	0.55	-0.341236	[]
Traes_7DL_4DCA4C458.1	ATP binding Source: UniProtKB-KW proteasome-activating ATPase activity Source: GO_Central TBP-class protein binding	positive regulation of RNA polymerase II transcriptional preinitiation complex assembly Source: GO_Central ubiquitin-dependent ERAD pathway	pep:novel chromosome:IWGSC1.0+popseq:7D:98286308:98289390:1 gene:Traes_7DL_4DCA4C458 transcript:Traes_7DL_4DCA4C458.1	47 kDa	0.55	-0.537885	[]
TRAES3BF013000040CFD_t1	cysteine-type endopeptidase activity Source: UniProtKB cysteine-type peptidase activity Source: TAIR identical protein binding	2,3-defense response Source: UniProtKB-KW positive regulation of programmed cell death Source: UniProtKB protein autoprocessing	Ortholog: Encodes MCP2d, the predominant and constitutively expressed member of type II metacaspases (MCPs). MCP2d plays a positive regulatory role in biotic and abiotic stress-induced programmed cell death (PCD)	44 kDa	0.55	-0.234677	[]
Traes_2AL_2B01693491.2	ATPase activity, coupled to transmembrane movement of substances	proton transport	Ortholog: vacuolar ATP synthase subunit D (VATD) / V-ATPase D subunit / vacuolar proton pump D subunit (VATPD); FUNCTIONS IN: ATPase activity, coupled to transmembrane movement of substances, proton-transporting ATPase activity, rotational mechanism	29 kDa	0.54	0.340111	[]
Traes_2BL_B36482127.1	heme binding Source: InterPro metal ion binding Source: UniProtKB-KW peroxidase activity	hydrogen peroxide catabolic process Source: UniProtKB-KW plant-type cell wall organization Source: GO_Central response to oxidative stress	Ortholog: Peroxidase superfamily protein; FUNCTIONS IN: peroxidase activity, heme binding; INVOLVED IN: response to oxidative stress, oxidation reduction	26 kDa	0.54	0.422102	[]
Traes_4AS_91D4C5213.1 (+2)	fructose 1,6-bisphosphate 1-phosphatase activity Source: TAIR metal ion binding	fructose 1,6-bisphosphate metabolic process Source: TAIR fructose 6-phosphate metabolic process Source: GO_Central fructose metabolic process Source: GO_Central gluconeogenesis Source: GO_Central photosynthesis Source: TAIR photosynthetic electron transport in photosystem I Source: TAIR reductive pentose-phosphate cycle Source: UniProtKB-UniPathway response to cold Source: TAIR response to cytoki…	pep:known chromosome:IWGSC1.0+popseq:4A:59511215:59513183:-1 gene:Traes_4AS_91D4C5213 transcript:Traes_4AS_91D4C5213.1 description:"Fructose-1,6-bisphosphatase, chloroplastic"	44 kDa	0.54	0.129607	[]
Traes_5DS_D693664F7.4	fructose-bisphosphate aldolase activity	gluconeogenesis Source: UniProtKB glycolytic process Source: UniProtKB response to abscisic acid Source: TAIR response to cadmium ion	Ortholog: Protein is tyrosine-phosphorylated and its phosphorylation state is modulated in response to ABA in Arabidopsis thaliana seeds	42 kDa	0.54	-0.0842603	[]
Traes_6AL_643CE8D7C.2	ATP binding Source: UniProtKB-KW metal ion binding Source: UniProtKB-KW methionine adenosyltransferase activity Source: TAIR mRNA binding	lignin biosynthetic process Source: TAIR methionine metabolic process Source: TAIR one-carbon metabolic process Source: UniProtKB-KW response to cold Source: TAIR S-adenosylmethionine biosynthetic process	pep:novel scaffold:IWGSC1.0+popseq:IWGSC_CSS_6AL_scaff_5714980:1781:4018:-1 gene:Traes_6AL_643CE8D7C transcript:Traes_6AL_643CE8D7C.2	47 kDa	0.54	-0.314847	[]
TRAES3BF107400010CFD_t1	fructose-bisphosphate aldolase activity	gluconeogenesis Source: UniProtKB glycolytic process	pep:novel chromosome:IWGSC1.0+popseq:3B:640776010:640778775:1 gene:TRAES3BF107400010CFD_g transcript:TRAES3BF107400010CFD_t1	39 kDa	0.54	0.130805	[]
Traes_2BL_E8D5E0972.1	transferase activity, transferring acyl groups other than amino-acyl groups	chloroplast fission Source: TAIR embryo development ending in seed dormancy Source: TAIR fatty acid biosynthetic process Source: InterPro response to cytokinin	pep:novel scaffold:IWGSC1.0+popseq:IWGSC_CSS_2BL_scaff_7984209:49:3632:1 gene:Traes_2BL_E8D5E0972 transcript:Traes_2BL_E8D5E0972.1	43 kDa	0.53	-0.503316	[]
Traes_4AL_4D0EE1369.1 (+1)		photorespiration	pep:novel chromosome:IWGSC1.0+popseq:4A:165622404:165625347:1 gene:Traes_4AL_4D0EE1369 transcript:Traes_4AL_4D0EE1369.1	11 kDa	0.53	1.06531	[]
Traes_4DS_35423C70B.1 (+1)	calcium ion binding Source: InterPro electron transporter, transferring electrons within the cyclic electron transport pathway of photosynthesis activity	photosynthetic electron transport chain	pep:novel scaffold:IWGSC1.0+popseq:IWGSC_CSS_4DS_scaff_2312854:2885:4080:1 gene:Traes_4DS_35423C70B transcript:Traes_4DS_35423C70B.1	24 kDa	0.53	0.980757	[]
Traes_5BL_383D0D512.1	DNA binding Source: UniProtKB-KW protein heterodimerization activity		pep:novel chromosome:IWGSC1.0+popseq:5B:217772521:217774273:-1 gene:Traes_5BL_383D0D512 transcript:Traes_5BL_383D0D512.1	16 kDa	0.53	0.148075	[]
Traes_1BL_6636CF8B8.1	mRNA binding Source: GO_Central rRNA binding Source: GO_Central structural constituent of ribosome	ribosomal small subunit assembly Source: GO_Central translation	pep:novel scaffold:IWGSC1.0+popseq:IWGSC_CSS_1BL_scaff_3850610:249:719:-1 gene:Traes_1BL_6636CF8B8 transcript:Traes_1BL_6636CF8B8.1	18 kDa	0.52	1.92517	[]
Traes_2AS_529825553.1	copper ion binding Source: GO_Central superoxide dismutase activity Source: TAIR zinc ion binding	cellular response to copper ion Source: TAIR cellular response to light intensity Source: UniProtKB cellular response to oxidative stress Source: UniProtKB cellular response to ozone Source: UniProtKB cellular response to salt stress Source: UniProtKB cellular response to sucrose stimulus Source: UniProtKB cellular response to UV-B Source: UniProtKB defense response to bacterium Source: TAIR gene…	pep:novel chromosome:IWGSC1.0+popseq:2A:138525268:138529657:1 gene:Traes_2AS_529825553 transcript:Traes_2AS_529825553.1 description:"copper/zinc superoxide dismutase 1"	15 kDa	0.52	-1.00845	[]
Traes_2DS_6C7B7F808.2		photosynthesis Source: TAIR photosystem II assembly Source: UniProtKB photosystem II repair Source: UniProtKB response to high light intensity Source: UniProtKB response to light stimulus Source: TAIR response to wounding	Protein containing PDZ domain, a K-box domain, and a TPR region	36 kDa	0.52	0.240325	[]
Traes_3AL_238C46A6F.2	peroxidase activity Source: UniProtKB-KW peroxiredoxin activity	cell redox homeostasis Source: InterPro response to cadmium ion	pep:novel chromosome:IWGSC1.0+popseq:3A:149537779:149541922:-1 gene:Traes_3AL_238C46A6F transcript:Traes_3AL_238C46A6F.2	17 kDa	0.52	-0.245627	[]
Traes_3B_3793EBCBE.1	protein domain specific binding	photosynthesis	pep:novel scaffold:IWGSC1.0+popseq:IWGSC_CSS_3B_scaff_10484319:1418:2647:-1 gene:Traes_3B_3793EBCBE transcript:Traes_3B_3793EBCBE.1	22 kDa	0.52	0.794068	[]
Traes_4BL_88634CB1B.1	ATP binding Source: UniProtKB-KW protein binding involved in protein folding Source: UniProtKB unfolded protein binding	de novo' protein folding Source: GO_Central chaperone-mediated protein folding Source: GO_Central positive regulation of transport Source: UniProtKB protein folding	pep:novel chromosome:IWGSC1.0+popseq:4B:107146653:107152693:1 gene:Traes_4BL_88634CB1B transcript:Traes_4BL_88634CB1B.1	58 kDa	0.52	0.791679	[]
Traes_4DL_9A4AAE446.1	ATP binding Source: UniProtKB-KW protein binding involved in protein folding Source: GO_Central unfolded protein binding	de novo' protein folding Source: GO_Central chaperone-mediated protein folding	pep:novel scaffold:IWGSC1.0+popseq:IWGSC_CSS_4DL_scaff_14388435:2786:7173:1 gene:Traes_4DL_9A4AAE446 transcript:Traes_4DL_9A4AAE446.1	57 kDa	0.52	0.290573	[]
TRAES3BF032700130CFD_t1	cysteine-type endopeptidase activity	anther wall tapetum development Source: TAIR defense response to fungus Source: UniProtKB plant-type hypersensitive response Source: TAIR pollen development Source: TAIR programmed cell death involved in cell development Source: TAIR proteolysis involved in cellular protein catabolic process	pep:novel chromosome:IWGSC1.0+popseq:3B:587272145:587273239:1 gene:TRAES3BF032700130CFD_g transcript:TRAES3BF032700130CFD_t1	40 kDa	0.52	0.836534	[]
TRAES3BF053500090CFD_t1	cysteine-type peptidase activity		pep:novel chromosome:IWGSC1.0+popseq:3B:691532028:691533497:-1 gene:TRAES3BF053500090CFD_g transcript:TRAES3BF053500090CFD_t1	39 kDa	0.52	0.47548	[]
TRAES3BF086900030CFD_t1	hydrogen ion transmembrane transporter activity	ATP hydrolysis coupled cation transmembrane transport Source: GOC ATP synthesis coupled proton transport	pep:novel chromosome:IWGSC1.0+popseq:3B:374862343:374864943:-1 gene:TRAES3BF086900030CFD_g transcript:TRAES3BF086900030CFD_t1	14 kDa	0.52	-0.490092	[]
Traes_1BS_F226DF9B4.1	glutathione binding Source: TAIR glutathione dehydrogenase (ascorbate) activity Source: TAIR glutathione transferase activity	glutathione metabolic process Source: GO_Central positive regulation of salicylic acid mediated signaling pathway Source: TAIR protein glutathionylation	pep:novel scaffold:IWGSC1.0+popseq:IWGSC_CSS_1BS_scaff_3459314:1:4896:-1 gene:Traes_1BS_F226DF9B4 transcript:Traes_1BS_F226DF9B4.1	34 kDa	0.51	-0.462959	[]
Traes_3AL_7BCADDE08.1	mRNA binding Source: TAIR structural constituent of ribosome	embryo development ending in seed dormancy Source: TAIR pollen tube growth Source: TAIR translation	pep:novel chromosome:IWGSC1.0+popseq:3A:92189334:92191028:-1 gene:Traes_3AL_7BCADDE08 transcript:Traes_3AL_7BCADDE08.1	21 kDa	0.51	0.785311	[]
Traes_4AL_FF377A215.2 (+1)	GTPase activity Source: InterPro GTP binding Source: UniProtKB-KW structural constituent of cytoskeleton	microtubule-based process	pep:novel chromosome:IWGSC1.0+popseq:4A:169599410:169603213:1 gene:Traes_4AL_FF377A215 transcript:Traes_4AL_FF377A215.2	50 kDa	0.51	0.145683	[]
Traes_6DL_0FF72D765.1	geranylgeranyl diphosphate reductase activity Source: UniProtKB-EC geranylgeranyl reductase activity	chlorophyll biosynthetic process Source: UniProtKB-UniPathway photosynthesis Source: UniProtKB-KW vitamin E biosynthetic process	Ortholog: Encodes for a multifunctional protein with geranylgeranyl reductase activity shown to catalyze the reduction of prenylated geranylgeranyl-chlorophyll a to phytyl-chlorophyll a (chlorophyll a) and free geranylgeranyl pyrophosphate to phytyl pyrophosphate	43 kDa	0.51	-0.289297	[]
Traes_7BL_B2D191807.1	3-hydroxyisobutyryl-CoA hydrolase activity		pep:novel chromosome:IWGSC1.0+popseq:7B:186555346:186561531:1 gene:Traes_7BL_B2D191807 transcript:Traes_7BL_B2D191807.1	38 kDa	0.51	0.822369	[]
Traes_7DL_35DFF1FCF.1		photosynthesis Source: UniProtKB-KW plastid organization Source: TAIR protein complex assembly Source: TAIR response to cadmium ion Source: TAIR response to cytokinin	pep:novel scaffold:IWGSC1.0+popseq:IWGSC_CSS_7DL_scaff_3384660:1:2171:1 gene:Traes_7DL_35DFF1FCF transcript:Traes_7DL_35DFF1FCF.1 description:"photosystem II stability/assembly factor, chloroplast (HCF136)"	37 kDa	0.51	-0.208762	[]
TRAES3BF142600080CFD_t1	sedoheptulose-7-phosphate:D-glyceraldehyde-3-phosphate glyceronetransferase activity	carbohydrate metabolic process Source: InterPro lignin biosynthetic process Source: TAIR pentose-phosphate shunt Source: InterPro response to cadmium ion Source: TAIR shikimate biosynthetic process	Aldolase-type TIM barrel family protein	46 kDa	0.51	-0.186367	[]
Traes_1AL_FBEE851D3.1 (+1)	proton-transporting ATP synthase activity, rotational mechanism Source: InterPro zinc ion binding	ATP synthesis coupled proton transport	pep:novel chromosome:IWGSC1.0+popseq:1A:79142001:79146444:-1 gene:Traes_1AL_FBEE851D3 transcript:Traes_1AL_FBEE851D3.1	36 kDa	0.5	0.319953	[]
Traes_4AS_894CED0DA.1	ATP binding	response to heat Source: UniProtKB response to virus	pep:novel chromosome:IWGSC1.0+popseq:4A:54041541:54044149:-1 gene:Traes_4AS_894CED0DA transcript:Traes_4AS_894CED0DA.1	72 kDa	0.5	-0.209141	[]
Traes_4DS_E5AD7818A.1	disordered domain specific binding Source: CAFA glyceraldehyde-3-phosphate dehydrogenase (NAD+) (phosphorylating) activity Source: CAFA glyceraldehyde-3-phosphate dehydrogenase (NADP+) (phosphorylating) activity Source: UniProtKB-EC identical protein binding Source: CAFA NAD binding Source: CAFA NADP binding Source: CAFA protein homodimerization activity	glucose metabolic process Source: InterPro protein homotetramerization Source: CAFA reductive pentose-phosphate cycle Source: TAIR response to cold Source: TAIR response to light stimulus Source: TAIR response to sucrose	pep:novel scaffold:IWGSC1.0+popseq:IWGSC_CSS_4DS_scaff_978931:3:762:1 gene:Traes_4DS_E5AD7818A transcript:Traes_4DS_E5AD7818A.1	18 kDa	0.5	-1.05514	[]
Traes_5BL_8FFD203BD.1		ethylene biosynthetic process Source: TAIR protein neddylation Source: TAIR response to auxin	pep:novel chromosome:IWGSC1.0+popseq:5B:165661050:165662933:1 gene:Traes_5BL_8FFD203BD transcript:Traes_5BL_8FFD203BD.1 description:"Ubiquitin "	17 kDa	0.5	0.185908	[]
Traes_5BS_4A820ABB2.1		defense response to bacterium, incompatible interaction Source: TAIR defense response to fungus, incompatible interaction Source: TAIR response to salt stress	pep:novel chromosome:IWGSC1.0+popseq:5B:5000634:5001777:-1 gene:Traes_5BS_4A820ABB2 transcript:Traes_5BS_4A820ABB2.1	27 kDa	0.5	0.826688	[]
Traes_6AS_236AF32FD.1	ATP binding	regulation of transcription, DNA-templated Source: UniProtKB-KW transcription, DNA-templated Source: UniProtKB-KW ubiquitin-dependent ERAD pathway	pep:novel chromosome:IWGSC1.0+popseq:6A:6628273:6631835:1 gene:Traes_6AS_236AF32FD transcript:Traes_6AS_236AF32FD.1	73 kDa	0.5	0.121469	[]
Traes_7BS_0BE381F61.1	6-phosphofructokinase activity Source: InterPro ATP binding Source: InterPro diphosphate-fructose-6-phosphate 1-phosphotransferase activity Source: TAIR metal ion binding	fructose 6-phosphate metabolic process Source: InterPro photosynthesis Source: TAIR response to cadmium ion Source: TAIR response to cytokinin	Ortholog: Phosphofructokinase family protein; FUNCTIONS IN: diphosphate-fructose-6-phosphate 1-phosphotransferase activity; INVOLVED IN: response to cadmium ion, glycolysis, photosynthesis	51 kDa	0.5	-0.688445	[]
TRAES3BF023000010CFD_t1	ATP binding Source: TAIR unfolded protein binding	protein folding Source: InterPro response to cadmium ion Source: TAIR response to heat Source: TAIR response to salt stress Source: TAIR response to virus	pep:novel chromosome:IWGSC1.0+popseq:3B:530444897:530448805:1 gene:TRAES3BF023000010CFD_g transcript:TRAES3BF023000010CFD_t1	73 kDa	0.5	-0.102166	[]
TRAES3BF153400060CFD_t1	calmodulin binding Source: UniProtKB-KW DNA binding	regulation of transcription, DNA-templated Source: UniProtKB-KW response to stress Source: InterPro transcription, DNA-templated	Ortholog: Calmodulin-binding protein; FUNCTIONS IN: calmodulin binding; INVOLVED IN: biological_process unknown	149 kDa	0.5	0.205339	[]
Traes_1AL_1DC9BD199.1 (+1)	copper ion binding Source: TAIR ketol-acid reductoisomerase activity	isoleucine biosynthetic process Source: UniProtKB-UniPathway response to cadmium ion Source: TAIR valine biosynthetic process	Ortholog: ketol-acid reductoisomerase	42 kDa	0.49	0.330979	[]
Traes_1BL_BD3E22844.1	copper ion binding Source: TAIR L-malate dehydrogenase activity	carbohydrate metabolic process Source: InterPro defense response to bacterium Source: TAIR malate metabolic process Source: InterPro response to cadmium ion Source: TAIR response to cold Source: TAIR response to salt stress Source: TAIR tricarboxylic acid cycle	pep:novel chromosome:IWGSC1.0+popseq:1B:287054168:287059247:-1 gene:Traes_1BL_BD3E22844 transcript:Traes_1BL_BD3E22844.1	36 kDa	0.49	0.154093	[]
Traes_2AS_3B6EDACAD.1	L-alanine:2-oxoglutarate aminotransferase activity Source: UniProtKB-EC pyridoxal phosphate binding	biosynthetic process Source: InterPro L-alanine catabolic process Source: UniProtKB-UniPathway response to hypoxia	pep:novel chromosome:IWGSC1.0+popseq:2A:161845934:161851114:-1 gene:Traes_2AS_3B6EDACAD transcript:Traes_2AS_3B6EDACAD.1	61 kDa	0.49	1.05991	[]
Traes_3AS_D1B055CE7.3	calcium ion binding Source: InterPro GTPase activator activity Source: TAIR N-acylphosphatidylethanolamine-specific phospholipase D activity Source: UniProtKB-EC phosphatidylinositol-4,5-bisphosphate binding Source: TAIR phospholipase activity Source: TAIR phospholipase D activity	abscisic acid-activated signaling pathway Source: TAIR ethylene-activated signaling pathway Source: UniProtKB-KW fatty acid metabolic process Source: TAIR leaf shaping Source: TAIR lipid catabolic process Source: UniProtKB-KW phosphatidylcholine metabolic process Source: InterPro positive regulation of abscisic acid-activated signaling pathway Source: TAIR regulation of stomatal movement Source: …	Ortholog: Encodes phospholipase D alpha 1 (PLD alpha 1). Positive regulator of abscisic acid (ABA) mediated stomatal movements	92 kDa	0.49	-0.147797	[]
Traes_4BS_D12DBE6D3.1	fructose-bisphosphate aldolase activity	gluconeogenesis Source: UniProtKB glycolytic process Source: UniProtKB response to cadmium ion	Ortholog: fructose-bisphosphate aldolase 1 (FBA1); FUNCTIONS IN: fructose-bisphosphate aldolase activity, catalytic activity; INVOLVED IN: response to cadmium ion, pentose-phosphate shunt	42 kDa	0.49	-0.114913	[]
Traes_5AL_BEBCB4723.1	electron transfer activity Source: InterPro heme binding Source: InterPro iron ion binding	photosynthetic electron transport chain	pep:novel scaffold:IWGSC1.0+popseq:IWGSC_CSS_5AL_scaff_2809997:2183:3145:-1 gene:Traes_5AL_BEBCB4723 transcript:Traes_5AL_BEBCB4723.1	35 kDa	0.49	0.10871	[]
Traes_5DL_8214EA296.1	threonine-type endopeptidase activity	defense response to fungus, incompatible interaction Source: TAIR proteolysis involved in cellular protein catabolic process	pep:novel chromosome:IWGSC1.0+popseq:5D:104658934:104662764:1 gene:Traes_5DL_8214EA296 transcript:Traes_5DL_8214EA296.1 description:"N-terminal nucleophile aminohydrolases (Ntn hydrolases) superfamily protein"	33 kDa	0.49	-0.174564	[]
Traes_1BL_46DCF8472.1	1-pyrroline-5-carboxylate dehydrogenase activity Source: TAIR cobalt ion binding Source: TAIR oxidoreductase activity, acting on the aldehyde or oxo group of donors, NAD or NADP as acceptor Source: InterPro zinc ion binding	proline catabolic process to glutamate Source: TAIR proline metabolic process Source: TAIR reactive oxygen species metabolic process Source: TAIR response to salt stress	pep:novel chromosome:IWGSC1.0+popseq:1B:271476477:271483404:1 gene:Traes_1BL_46DCF8472 transcript:Traes_1BL_46DCF8472.1 description:"aldehyde dehydrogenase 12A1"	61 kDa	0.48	-1.23946	[]
Traes_2BL_342BDEA35.2	ATP binding Source: UniProtKB-KW glutamate-ammonia ligase activity	aging Source: TAIR ammonia assimilation cycle Source: TAIR glutamine biosynthetic process Source: InterPro response to cadmium ion Source: TAIR response to cytokinin Source: TAIR response to salt stress	Glutamine synthetase 2	54 kDa	0.48	-0.178618	[]
Traes_2DL_DECB6FBDB.1	electron transfer activity Source: InterPro protein disulfide oxidoreductase activity	cell redox homeostasis	pep:novel chromosome:IWGSC1.0+popseq:2D:28371234:28373635:-1 gene:Traes_2DL_DECB6FBDB transcript:Traes_2DL_DECB6FBDB.1 description:"Glutaredoxin family protein"	13 kDa	0.48	0.585706	[]
Traes_3DL_1118D4779.2	GTP binding Source: TAIR phospholipase activator activity		Ortholog: A member of ARF GTPase family. A thaliana has 21 members of this family, known to be essential for vesicle coating and uncoating and functions in GTP-binding	25 kDa	0.48	-0.659255	[]
Traes_4AS_13C312D8E.1 (+1)	metal ion binding Source: GO_Central ribulose-phosphate 3-epimerase activity	cellular carbohydrate metabolic process Source: GO_Central pentose catabolic process Source: GO_Central pentose-phosphate shunt, non-oxidative branch Source: GO_Central response to cold Source: TAIR response to nematode	D-ribulose-5-phosphate-3-epimerase	29 kDa	0.48	0.418089	[]
Traes_4DS_AFAF2A29E.1		developmental process Source: TAIR regulation of cell proliferation	Translationally-controlled tumor protein homolog	19 kDa	0.48	0.112864	[]
Traes_5BS_8ECE54AC4.1	mRNA binding	alternative mRNA splicing, via spliceosome Source: TAIR innate immune response Source: TAIR response to abscisic acid Source: TAIR response to cold Source: UniProtKB response to cytokinin Source: TAIR response to salt stress Source: TAIR response to zinc ion	Ortholog: Encodes a glycine-rich protein with RNA binding domain at the N-terminus. Protein is structurally similar to proteins induced by stress in other plants. Gene expression is induced by cold	10 kDa	0.48	-0.146988	[]
Traes_6BS_9F156F52A.1	cobalt ion binding Source: TAIR copper ion binding Source: TAIR zinc ion binding	pollen development Source: TAIR proton transport	pep:novel chromosome:IWGSC1.0+popseq:6B:25803654:25807014:1 gene:Traes_6BS_9F156F52A transcript:Traes_6BS_9F156F52A.1 description:"copper ion binding\x3bcobalt ion binding\x3bzinc ion binding"	26 kDa	0.48	-1.10525	[]
Traes_7AL_ADAC59D80.1 (+1)	RNA binding		pep:novel chromosome:IWGSC1.0+popseq:7A:91160616:91165640:1 gene:Traes_7AL_ADAC59D80 transcript:Traes_7AL_ADAC59D80.1	71 kDa	0.48	1.1714	[]
Traes_7AL_B89A5FB9A.1 (+1)	ATP binding Source: InterPro hydrolase activity	ATP hydrolysis coupled proton transport Source: InterPro ATP metabolic process	Ortholog: One of three genes encoding the vacuolar ATP synthase subunit B1. The protein binds to and co-localizes with F-actin, bundles F-actin to form higher-order structure, and stabilizes actin filaments in vitro	54 kDa	0.48	0.183314	[]
Traes_7DS_B4756536E.1	4 iron, 4 sulfur cluster binding Source: UniProtKB-KW copper ion binding Source: TAIR dihydroxy-acid dehydratase activity Source: GO_Central hydro-lyase activity	branched-chain amino acid biosynthetic process Source: TAIR embryo sac development Source: TAIR isoleucine biosynthetic process Source: UniProtKB-UniPathway pollen development Source: TAIR response to salt stress Source: TAIR root development Source: TAIR valine biosynthetic process	pep:novel chromosome:IWGSC1.0+popseq:7D:167526265:167531302:1 gene:Traes_7DS_B4756536E transcript:Traes_7DS_B4756536E.1 description:"dehydratase family"	54 kDa	0.48	0.478057	[]
TRAES3BF024300150CFD_t1	GTPase activity Source: InterPro GTP binding Source: UniProtKB-KW identical protein binding Source: IntAct microtubule binding	cell cycle Source: UniProtKB-KW cell division Source: UniProtKB-KW peroxisome organization	pep:novel chromosome:IWGSC1.0+popseq:3B:680010849:680017482:-1 gene:TRAES3BF024300150CFD_g transcript:TRAES3BF024300150CFD_t1	90 kDa	0.48	-1.11271	[]
EPlTAEP00000010071 (+1)	rRNA binding Source: UniProtKB-KW structural constituent of ribosome Source: InterPro	translation	pep:known chromosome:IWGSC1.0+popseq:Pt:76130:76540:-1 gene:EPlTAEG00000010071 transcript:EPlTAET00000010071 description:"30S ribosomal protein S8, chloroplastic"	16 kDa	0.47	-1.14101	[]
Traes_1AL_1D8244B27.1 (+1)	alanine-glyoxylate transaminase activity Source: GO_Central identical protein binding Source: GO_Central pyridoxal phosphate binding	cellular response to nitrogen levels Source: TAIR photorespiration	pep:novel scaffold:IWGSC1.0+popseq:IWGSC_CSS_1AL_scaff_3958906:1853:5566:-1 gene:Traes_1AL_1D8244B27 transcript:Traes_1AL_1D8244B27.1	51 kDa	0.47	-0.990853	[]
Traes_1AL_3336F1DFB.1	IMP cyclohydrolase activity Source: InterPro phosphoribosylaminoimidazolecarboxamide formyltransferase activity	purine nucleotide biosynthetic process Source: InterPro response to cold	Ortholog: AICARFT/IMPCHase bienzyme family protein; FUNCTIONS IN: phosphoribosylaminoimidazolecarboxamide formyltransferase activity, IMP cyclohydrolase activity, catalytic activity; INVOLVED IN: response to cold, purine nucleotide biosynthetic process	75 kDa	0.47	-0.896837	[]
Traes_1AL_ED72E167A.2 (+2)	raffinose alpha-galactosidase activity	carbohydrate metabolic process Source: InterPro cell wall organization Source: UniProtKB-KW leaf morphogenesis Source: TAIR positive regulation of flower development Source: TAIR response to fungus	pep:novel chromosome:IWGSC1.0+popseq:1A:43561118:43565728:-1 gene:Traes_1AL_ED72E167A transcript:Traes_1AL_ED72E167A.2	41 kDa	0.47	0.942407	[]
Traes_1BL_F1066854B.2	ATP binding Source: UniProtKB-KW nucleoside diphosphate kinase activity Source: GO_Central zinc ion binding	CTP biosynthetic process Source: InterPro GTP biosynthetic process Source: InterPro UTP biosynthetic process	pep:novel chromosome:IWGSC1.0+popseq:1B:288978005:288981850:1 gene:Traes_1BL_F1066854B transcript:Traes_1BL_F1066854B.2	27 kDa	0.47	-0.130028	[]
Traes_2AL_0F6C79FDA.2	chromatin binding Source: TAIR guanyl-nucleotide exchange factor activity Source: TAIR identical protein binding Source: IntAct photoreceptor activity Source: UniProtKB-KW protein homodimerization activity	entrainment of circadian clock Source: TAIR protein-chromophore linkage Source: UniProtKB-KW response to UV Source: TAIR response to UV-B	pep:novel scaffold:IWGSC1.0+popseq:IWGSC_CSS_2AL_scaff_6436497:6252:11370:-1 gene:Traes_2AL_0F6C79FDA transcript:Traes_2AL_0F6C79FDA.2	47 kDa	0.47	0.537209	[]
Traes_3AL_3D5C860FD.1	copper ion binding Source: TAIR isocitrate dehydrogenase (NADP+) activity Source: TAIR magnesium ion binding Source: InterPro NAD binding	defense response to bacterium Source: TAIR isocitrate metabolic process Source: TAIR NADP metabolic process Source: TAIR response to cadmium ion Source: TAIR response to salt stress Source: TAIR response to zinc ion Source: TAIR tricarboxylic acid cycle	Ortholog: Encodes a NADP+-isocitrate dehydrogenase that is believed to function in the cytosol. It appears to contribute to NADPH production under oxidative stress, and thereby to participate in redox signalling linked to defense responses	35 kDa	0.47	0.208879	[]
Traes_4DL_A3860F7BD.1	ATP binding Source: UniProtKB-KW ATP-dependent RNA helicase activity Source: GO_Central RNA binding Source: UniProtKB-KW RNA-dependent ATPase activity Source: TAIR RNA helicase activity	poly(A)+ mRNA export from nucleus Source: TAIR response to abscisic acid Source: TAIR response to cold Source: TAIR response to heat Source: TAIR RNA secondary structure unwinding	pep:novel chromosome:IWGSC1.0+popseq:4D:11598949:11604620:1 gene:Traes_4DL_A3860F7BD transcript:Traes_4DL_A3860F7BD.1	56 kDa	0.47	-1.15294	[]
Traes_6BL_83DE6DC09.1	cytochrome-c peroxidase activity Source: GO_Central heme binding Source: InterPro L-ascorbate peroxidase activity Source: UniProtKB-EC metal ion binding	cellular response to oxidative stress Source: GO_Central chloroplast-nucleus signaling pathway Source: TAIR cold acclimation Source: TAIR hydrogen peroxide catabolic process Source: GO_Central hydrogen peroxide mediated signaling pathway Source: TAIR response to reactive oxygen species	Ortholog: Encodes a chloroplastic thylakoid ascorbate peroxidase tAPX. Ascorbate peroxidases are enzymes that scavenge hydrogen peroxide in plant cells	40 kDa	0.47	-0.246788	[]
Traes_6DL_2440ED50B.1	nutrient reservoir activity Source: UniProtKB-KW transporter activity	cellular chloride ion homeostasis Source: UniProtKB cellular sodium ion homeostasis Source: UniProtKB heat acclimation Source: UniProtKB hyperosmotic salinity response Source: UniProtKB lipid metabolic process Source: UniProtKB-KW positive regulation of response to oxidative stress Source: UniProtKB positive regulation of response to salt stress Source: UniProtKB response to cold Source: TAIR res…	pep:novel scaffold:IWGSC1.0+popseq:IWGSC_CSS_6DL_scaff_3250210:5989:7199:-1 gene:Traes_6DL_2440ED50B transcript:Traes_6DL_2440ED50B.1	22 kDa	0.47	0.213715	[]
TRAES3BF026200060CFD_t1	carbonate dehydratase activity Source: UniProtKB-EC zinc ion binding	carbon utilization Source: InterPro defense response to bacterium	Ortholog: Encodes a beta carbonic anhydrase likely to be localized in the cytoplasm. Expression of its mRNA is seen in etiolated seedlings and points to a possible nonphotosynthetic role for this isoform	28 kDa	0.47	-0.0741738	[]
EPlTAEP00000010007 (+17)	chlorophyll binding, electron transporter, metal ion binding	photosynthetic electron transport in photosystem II, protein-chromophore linkage	pep:known chromosome:IWGSC1.0+popseq:Pt:9666:11087:1 gene:EPlTAEG00000010007 transcript:EPlTAET00000010007 description:"Photosystem II CP43 reaction center protein "	52 kDa	0.46	-0.299289	[]
Traes_1AL_3D34ABA52.1 (+1)	GTPase activity Source: TAIR GTP binding	protein import into nucleus Source: TAIR ribosomal subunit export from nucleus	pep:novel chromosome:IWGSC1.0+popseq:1A:240492435:240495012:1 gene:Traes_1AL_3D34ABA52 transcript:Traes_1AL_3D34ABA52.1 description:"ras-related nuclear protein 4"	25 kDa	0.46	-0.199569	[]
Traes_1AL_A94F1853B.1	?	?	pep:novel chromosome:IWGSC1.0+popseq:1A:94035788:94038373:1 gene:Traes_1AL_A94F1853B transcript:Traes_1AL_A94F1853B.1 description:"Plastid-lipid associated protein PAP / fibrillin family protein"	32 kDa	0.46	0.435523	[]
Traes_2AL_41B176D01.2 (+1)	intramolecular transferase activity	cell wall organization Source: UniProtKB-KW plant-type cell wall biogenesis Source: GO_Central response to salt stress Source: TAIR UDP-L-arabinose metabolic process	Alpha-1,4-glucan-protein synthase family protein	39 kDa	0.46	2.57726	[]
Traes_2AL_55644CC39.1 (+1)	rRNA binding Source: GO_Central structural constituent of ribosome	ribosomal large subunit assembly Source: GO_Central translation	pep:novel chromosome:IWGSC1.0+popseq:2A:228614154:228616087:1 gene:Traes_2AL_55644CC39 transcript:Traes_2AL_55644CC39.1	18 kDa	0.46	0.197704	[]
Traes_3AL_441C0AE1B.1	fructose-bisphosphate aldolase activity	gluconeogenesis Source: UniProtKB glycolytic process	Ortholog: Aldolase superfamily protein; FUNCTIONS IN: fructose-bisphosphate aldolase activity, catalytic activity; INVOLVED IN: pentose-phosphate shunt	39 kDa	0.46	0.128836	[]
Traes_5DL_33BEF3CA3.2	ATP binding Source: UniProtKB-KW protein binding involved in protein folding Source: GO_Central unfolded protein binding	de novo' protein folding Source: GO_Central chaperone-mediated protein folding Source: GO_Central chloroplast organization Source: TAIR embryo development ending in seed dormancy Source: TAIR mitochondrion organization Source: GO_Central protein folding Source: TAIR protein refolding	pep:novel chromosome:IWGSC1.0+popseq:5D:155619660:155623448:1 gene:Traes_5DL_33BEF3CA3 transcript:Traes_5DL_33BEF3CA3.2	62 kDa	0.46	-0.285303	[]
Traes_6AL_7E70268F1.2 (+3)	inorganic diphosphatase activity Source: TAIR magnesium ion binding	phosphate-containing compound metabolic process	Pyrophosphorylase 2	34 kDa	0.46	1.17964	[]
Traes_7AS_0BB13DD79.1	glutathione dehydrogenase (ascorbate) activity Source: TAIR glutathione transferase activity	glutathione metabolic process Source: GO_Central protein glutathionylation Source: TAIR response to cytokinin	Dehydroascorbate reductase 1	24 kDa	0.46	1.16429	[]
Traes_7AS_3247D97E8.2	ATP binding Source: UniProtKB-KW protein binding involved in protein folding Source: GO_Central protein domain specific binding Source: CAFA unfolded protein binding	cell death Source: TAIR chaperone cofactor-dependent protein refolding Source: TAIR mitochondrion organization Source: GO_Central protein refolding Source: InterPro response to cold Source: TAIR systemic acquired resistance	Ortholog: encodes the beta subunit of the chloroplast chaperonin 60, a homologue of bacterial GroEL. Mutants in this gene develops lesions on its leaves, expresses systemic acquired resistance (SAR) and develops accelerated cell death to heat shock stress	64 kDa	0.46	-0.0474272	[]
TRAES3BF049800100CFD_t1	glyoxylate reductase (NADP) activity Source: UniProtKB hydroxypyruvate reductase activity Source: UniProtKB NAD binding	oxidative photosynthetic carbon pathway	Ortholog: D-isomer specific 2-hydroxyacid dehydrogenase family protein; FUNCTIONS IN: in 6 functions; INVOLVED IN: metabolic process	51 kDa	0.46	0.175804	[]
TRAES3BF117500090CFD_t1 (+6)	structural constituent of ribosome	translation	pep:novel chromosome:IWGSC1.0+popseq:3B:597066270:597066867:1 gene:TRAES3BF117500090CFD_g transcript:TRAES3BF117500090CFD_t1	15 kDa	0.46	0.207654	[]
Traes_1BL_56BBB4B2F.2 (+1)	ATP binding Source: UniProtKB-KW structural constituent of cytoskeleton	cell division Source: TAIR response to auxin Source: TAIR response to light stimulus Source: TAIR response to wounding Source: TAIR root development Source: TAIR root epidermal cell differentiation Source: TAIR root hair elongation Source: TAIR seed germination	pep:novel chromosome:IWGSC1.0+popseq:1B:176345614:176347070:-1 gene:Traes_1BL_56BBB4B2F transcript:Traes_1BL_56BBB4B2F.2	43 kDa	0.45	-0.519682	[]
Traes_2BS_68A7179D8.2 (+5)	ATP binding Source: UniProtKB-KW proton-transporting ATP synthase activity, rotational mechanism Source: InterPro zinc ion binding	ATP synthesis coupled proton transport Source: InterPro defense response to fungus, incompatible interaction Source: TAIR response to cold	Ortholog: chloroplast-encoded gene for beta subunit of ATP synthase	37 kDa	0.45	0.119568	[]
Traes_2DL_B7F8FFEB9.1	ribosome binding Source: InterPro translation elongation factor activity Source: InterPro translation initiation factor activity	defense response to bacterium Source: TAIR host programmed cell death induced by symbiont Source: TAIR positive regulation of translational elongation Source: InterPro positive regulation of translational termination Source: InterPro programmed cell death Source: TAIR response to bacterium Source: TAIR response to cadmium ion Source: TAIR response to wounding Source: TAIR translational frameshift…	pep:novel chromosome:IWGSC1.0+popseq:2D:81692269:81694472:1 gene:Traes_2DL_B7F8FFEB9 transcript:Traes_2DL_B7F8FFEB9.1	17 kDa	0.45	0.294947	[]
Traes_4AS_8B4BD912B.2	carbohydrate binding	defense response to bacterium Source: TAIR stomatal closure	Ortholog: Encodes a nucleocytoplasmic lectin that is capable of binding carbohydrates. It is involved in ABA mediated stomatal movement and increased expression is correlated with increased resistance to Pseudomonas syringae	39 kDa	0.45	-0.0961256	[]
Traes_4DS_EB7A5C35C.2	clathrin light chain binding Source: InterPro structural molecule activity	clathrin coat assembly Source: InterPro clathrin-dependent endocytosis Source: TAIR endocytosis Source: TAIR intracellular protein transport Source: InterPro stomatal movement Source: TAIR vesicle-mediated transport	Ortholog: Clathrin, heavy chain; FUNCTIONS IN: structural molecule activity, binding; INVOLVED IN: intracellular protein transport, vesicle-mediated transport	88 kDa	0.45	-0.667516	[]
Traes_5BL_9054A875E.2	mRNA binding Source: TAIR RNA binding Source: GO_Central structural constituent of ribosome	cytoplasmic translation Source: GO_Central maturation of LSU-rRNA from tricistronic rRNA transcript (SSU-rRNA, 5.8S rRNA, LSU-rRNA)	pep:novel chromosome:IWGSC1.0+popseq:5B:247670227:247672751:1 gene:Traes_5BL_9054A875E transcript:Traes_5BL_9054A875E.2	28 kDa	0.45	0.209362	[]
Traes_6AL_541B0B87B.1	electron transfer activity Source: InterPro flavin adenine dinucleotide binding Source: InterPro glutathione-disulfide reductase activity Source: GO_Central NADP binding	cell redox homeostasis Source: GO_Central glutathione metabolic process Source: InterPro response to oxygen radical	Glutathione-disulfide reductase	53 kDa	0.45	0.247732	[]
Traes_6DL_1AEA7B869.1	phenylalanine ammonia-lyase activity	cinnamic acid biosynthetic process Source: UniProtKB-UniPathway L-phenylalanine catabolic process	Ortholog: Encodes PAL4, a putative a phenylalanine ammonia-lyase	76 kDa	0.45	-0.187052	[]
Traes_7DS_98F9E4E55.1	DNA binding Source: GO_Central protein heterodimerization activity	chromatin silencing Source: GO_Central defense response to bacterium Source: TAIR detection of temperature stimulus Source: TAIR flower development Source: TAIR negative regulation of transcription, DNA-templated Source: TAIR response to osmotic stress	pep:novel chromosome:IWGSC1.0+popseq:7D:114525078:114526591:1 gene:Traes_7DS_98F9E4E55 transcript:Traes_7DS_98F9E4E55.1	15 kDa	0.45	0.365237	[]
TRAES3BF090800010CFD_t1 (+3)	cobalt ion binding Source: TAIR cysteine-type endopeptidase inhibitor activity Source: TAIR protease binding	defense response Source: UniProtKB-KW hyperosmotic response Source: TAIR negative regulation of cysteine-type endopeptidase activity Source: GO_Central response to cold Source: TAIR response to oxidative stress Source: TAIR response to water deprivation	pep:novel chromosome:IWGSC1.0+popseq:3B:250058825:250061301:-1 gene:TRAES3BF090800010CFD_g transcript:TRAES3BF090800010CFD_t1	27 kDa	0.45	-0.136891	[]
Traes_1AL_28696683F.1	heme binding Source: GO_Central steroid binding	negative regulation of cell growth	pep:novel chromosome:IWGSC1.0+popseq:1A:79920250:79922836:-1 gene:Traes_1AL_28696683F transcript:Traes_1AL_28696683F.1	32 kDa	0.44	-0.61899	[]
Traes_1AL_5EEF86979.1	peptide-methionine (S)-S-oxide reductase activity	response to light stimulus	Ortholog: ubiquitous enzyme that repairs oxidatively damaged proteins	28 kDa	0.44	-0.148322	[]
Traes_1AS_0C61D5E06.1	RNA binding Source: GO_Central rRNA binding Source: UniProtKB-KW structural constituent of ribosome	ribosomal large subunit assembly Source: GO_Central translation	pep:novel chromosome:IWGSC1.0+popseq:1A:156715793:156717807:1 gene:Traes_1AS_0C61D5E06 transcript:Traes_1AS_0C61D5E06.1	21 kDa	0.44	0.369313	[]
Traes_1BS_F7B1A6268.1	peptidyl-prolyl cis-trans isomerase activity Source: TAIR protein histidine kinase binding	NAD(P)H dehydrogenase complex assembly Source: TAIR protein folding	pep:novel chromosome:IWGSC1.0+popseq:1B:1472642:1475931:1 gene:Traes_1BS_F7B1A6268 transcript:Traes_1BS_F7B1A6268.1 description:"cyclophilin 20-2"	26 kDa	0.44	0.128852	[]
Traes_1DL_67E7C6FBD.3	MAP-kinase scaffold activity Source: UniProtKB signal transducer activity Source: UniProtKB-KW structural constituent of ribosome	cellular response to abscisic acid stimulus Source: TAIR positive regulation of signal transduction Source: UniProtKB regulation of translation Source: TAIR ribosome biogenesis Source: TAIR root development Source: TAIR seed germination Source: TAIR shoot system development	pep:novel chromosome:IWGSC1.0+popseq:1D:123894132:123896082:1 gene:Traes_1DL_67E7C6FBD transcript:Traes_1DL_67E7C6FBD.3	15 kDa	0.44	-1.23095	[]
Traes_2AS_1475F8BDB.1	2 iron, 2 sulfur cluster binding Source: UniProtKB-KW electron transporter, transferring electrons from cytochrome b6/f complex of photosystem II activity Source: TAIR electron transporter, transferring electrons within cytochrome b6/f complex of photosystem II activity Source: InterPro metal ion binding Source: UniProtKB-KW plastoquinol--plastocyanin reductase activity	defense response to bacterium Source: TAIR nonphotochemical quenching Source: TAIR photosynthetic electron transport chain Source: TAIR response to karrikin	Cytochrome b6-f complex iron-sulfur subunit, chloroplastic	24 kDa	0.44	-0.223831	[]
Traes_2AS_8CE0AADC5.1		thylakoid membrane organization Source: TAIR vesicle organization	pep:novel scaffold:IWGSC1.0+popseq:IWGSC_CSS_2AS_scaff_5264275:6587:10708:-1 gene:Traes_2AS_8CE0AADC5 transcript:Traes_2AS_8CE0AADC5.1	37 kDa	0.44	1.22221	[]
Traes_2BL_C542095DE.1	copper ion binding Source: TAIR methylmalonate-semialdehyde dehydrogenase (acylating) activity	response to oxidative stress	pep:novel chromosome:IWGSC1.0+popseq:2B:317352232:317358745:1 gene:Traes_2BL_C542095DE transcript:Traes_2BL_C542095DE.1 description:"aldehyde dehydrogenase 6B2"	58 kDa	0.44	0.332328	[]
Traes_4DS_80C6168FE.1	calcium ion binding	photosynthesis	PsbP-like protein 1	29 kDa	0.44	-0.391686	[]
Traes_5DL_935157A12.1	glutathione transferase activity	2,4,6-trinitrotoluene catabolic process Source: TAIR glutathione metabolic process Source: GO_Central toxin catabolic process	pep:novel chromosome:IWGSC1.0+popseq:5D:137148573:137150125:1 gene:Traes_5DL_935157A12 transcript:Traes_5DL_935157A12.1	10 kDa	0.44	1.22221	[]
Traes_6BL_4704FF2B4.1	4 iron, 4 sulfur cluster binding Source: UniProtKB-KW aconitate hydratase activity Source: UniProtKB ATP binding Source: TAIR copper ion binding	citrate metabolic process Source: UniProtKB glyoxylate cycle Source: UniProtKB-KW isocitrate metabolic process Source: TAIR response to abscisic acid Source: TAIR response to cadmium ion Source: TAIR response to oxidative stress Source: TAIR response to salt stress Source: TAIR seedling development Source: UniProtKB tricarboxylic acid cycle	Ortholog: Encodes an aconitase that can catalyze the conversion of citrate to isocitrate through a cis-aconitate intermediate, indicating that it may participate in the TCA cycle and other primary metabolic pathways	99 kDa	0.44	0.305671	[]
TRAES3BF280100010CFD_t1	dicarboxylic acid transmembrane transporter activity Source: TAIR oxoglutarate:malate antiporter activity Source: GO_Central tricarboxylic acid transmembrane transporter activity	dicarboxylic acid transport Source: TAIR mitochondrial transport Source: GO_Central tricarboxylic acid transmembrane transport	pep:novel chromosome:IWGSC1.0+popseq:3B:149713395:149716921:1 gene:TRAES3BF280100010CFD_g transcript:TRAES3BF280100010CFD_t1	33 kDa	0.44	-0.531817	[]
Traes_1BL_DD29F7E69.2		chloroplast organization Source: TAIR protein import into chloroplast stroma	pep:novel chromosome:IWGSC1.0+popseq:1B:189906920:189912944:-1 gene:Traes_1BL_DD29F7E69 transcript:Traes_1BL_DD29F7E69.2	33 kDa	0.43	1.28228	[]
Traes_1BS_15C828137.2	ATP binding Source: TAIR cobalt ion binding Source: TAIR copper ion binding Source: TAIR dihydrolipoyl dehydrogenase activity Source: UniProtKB-EC electron transfer activity Source: InterPro flavin adenine dinucleotide binding Source: InterPro zinc ion binding	cell redox homeostasis Source: InterPro response to cadmium ion	Ortholog: Encodes a mitochondrial lipoamide dehydrogenase whose expression is induced by light	53 kDa	0.43	0.25235	[]
Traes_3DL_D174E1D63.2	cysteine-type endopeptidase inhibitor activity Source: GO_Central protease binding	cellular response to cold Source: TAIR cellular response to heat Source: TAIR cellular response to water deprivation Source: TAIR defense response Source: UniProtKB-KW negative regulation of cysteine-type endopeptidase activity Source: GO_Central response to wounding	pep:novel chromosome:IWGSC1.0+popseq:3D:56302105:56303807:1 gene:Traes_3DL_D174E1D63 transcript:Traes_3DL_D174E1D63.2	10 kDa	0.43	1.27654	[]
Traes_5DL_A5EFA1CE8.1	?	?	pep:novel chromosome:IWGSC1.0+popseq:5D:60962108:60967848:-1 gene:Traes_5DL_A5EFA1CE8 transcript:Traes_5DL_A5EFA1CE8.1	37 kDa	0.43	-1.30258	[]
Traes_7BL_F45C15FA2.1	chromatin binding Source: TAIR DNA binding Source: TAIR DNA binding transcription factor activity Source: TAIR structural constituent of chromatin	chromatin assembly or disassembly	pep:novel chromosome:IWGSC1.0+popseq:7B:246732501:246734257:1 gene:Traes_7BL_F45C15FA2 transcript:Traes_7BL_F45C15FA2.1	11 kDa	0.43	0.208435	[]
Traes_7DL_CDBB76729.1	acid phosphatase activity Source: TAIR metal ion binding Source: UniProtKB-KW peroxidase activity	hydrogen peroxide catabolic process Source: UniProtKB-KW phosphate ion homeostasis	Purple acid phosphatase 26	55 kDa	0.43	1.25967	[]
TRAES3BF050800360CFD_t1	calmodulin binding Source: UniProtKB-KW glutamate decarboxylase activity Source: UniProtKB-EC pyridoxal phosphate binding	glutamate metabolic process	Ortholog: glutamate decarboxylase 5 (GAD5); FUNCTIONS IN: calmodulin binding; INVOLVED IN: carboxylic acid metabolic process, glutamate metabolic process	54 kDa	0.43	-0.426587	[]
TRAES3BF117100050CFD_t1	heme binding		pep:novel chromosome:IWGSC1.0+popseq:3B:175128159:175128974:-1 gene:TRAES3BF117100050CFD_g transcript:TRAES3BF117100050CFD_t1	24 kDa	0.43	0.790024	[]
Traes_2AL_57DF7CC48.1	mRNA binding Source: TAIR translation initiation factor activity	regulation of translation	pep:novel scaffold:IWGSC1.0+popseq:IWGSC_CSS_2AL_scaff_4963646:1:6502:1 gene:Traes_2AL_57DF7CC48 transcript:Traes_2AL_57DF7CC48.1 description:"Eukaryotic translation initiation factor isoform 4G-1 "	82 kDa	0.42	-1.33781	[]
Traes_2BS_6DEC6A223.1		chloroplast organization Source: TAIR defense response to bacterium Source: TAIR response to ozone	Plastid-lipid associated protein PAP / fibrillin family protein	29 kDa	0.42	0.661538	[]
Traes_4BS_875AC09D2.1	flavin adenine dinucleotide binding Source: InterPro monodehydroascorbate reductase (NADH) activity	hydrogen peroxide catabolic process Source: TAIR response to cadmium ion	pep:novel chromosome:IWGSC1.0+popseq:4B:2809322:2813295:-1 gene:Traes_4BS_875AC09D2 transcript:Traes_4BS_875AC09D2.1	58 kDa	0.42	-0.300736	[]
Traes_5DL_06E515CD3.2	copper ion binding Source: TAIR ferredoxin-NADP+ reductase activity	photosynthesis	pep:novel chromosome:IWGSC1.0+popseq:5D:137574426:137578269:1 gene:Traes_5DL_06E515CD3 transcript:Traes_5DL_06E515CD3.2	41 kDa	0.42	0.592156	[]
Traes_5DL_7F872A678.1	3-dehydroquinate synthase activity Source: UniProtKB-EC metal ion binding	aromatic amino acid family biosynthetic process Source: UniProtKB-KW chorismate biosynthetic process	pep:novel chromosome:IWGSC1.0+popseq:5D:117843382:117847308:1 gene:Traes_5DL_7F872A678 transcript:Traes_5DL_7F872A678.1	47 kDa	0.42	0.571294	[]
Traes_6DL_25CD15317.1	mRNA binding	regulation by virus of viral protein levels in host cell Source: TAIR response to cytokinin Source: TAIR RNA splicing	pep:novel scaffold:IWGSC1.0+popseq:IWGSC_CSS_6DL_scaff_1843809:713:3900:1 gene:Traes_6DL_25CD15317 transcript:Traes_6DL_25CD15317.1 description:"binding to TOMV RNA 1L (long form)"	36 kDa	0.42	-1.32916	[]
Traes_7AS_632F9819A.1	peptidase activity Source: TAIR threonine-type endopeptidase activity	proteolysis involved in cellular protein catabolic process Source: InterPro regulation of plant-type hypersensitive response Source: TAIR response to salt stress Source: TAIR response to zinc ion	pep:novel chromosome:IWGSC1.0+popseq:7A:10690362:10695361:-1 gene:Traes_7AS_632F9819A transcript:Traes_7AS_632F9819A.1	26 kDa	0.42	1.28637	[]
TRAES3BF160500010CFD_t1	peptidyl-prolyl cis-trans isomerase activity	protein folding	Ortholog: nuclear-encoded chloroplast stromal cyclophilin CYP20-3 (also known as ROC4). Protein is tyrosine-phosphorylated and its phosphorylation state is modulated in response to ABA in Arabidopsis thaliana seeds	22 kDa	0.42	0.32736	[]
Traes_2AL_065CDBD34.1 (+2)	structural constituent of ribosome	cytoplasmic translation Source: GO_Central response to cold Source: TAIR translational elongation	pep:novel chromosome:IWGSC1.0+popseq:2A:30424017:30425691:-1 gene:Traes_2AL_065CDBD34 transcript:Traes_2AL_065CDBD34.1	12 kDa	0.41	0.445555	[]
Traes_2AL_5C6928F55.2	oxidoreductase activity	response to cadmium ion	pep:novel scaffold:IWGSC1.0+popseq:IWGSC_CSS_2AL_scaff_6328512:1072:9374:-1 gene:Traes_2AL_5C6928F55 transcript:Traes_2AL_5C6928F55.2	26 kDa	0.41	1.0152	[]
Traes_2AL_8976B3985.1 (+1)	mRNA binding Source: TAIR RNA binding Source: GO_Central structural constituent of ribosome	ribosomal small subunit assembly	Ortholog: RNA binding Plectin/S10 domain-containing protein; FUNCTIONS IN: structural constituent of ribosome; INVOLVED IN: translation	20 kDa	0.41	1.37943	[]
Traes_2AL_B4C264AB8.1	3-isopropylmalate dehydrogenase activity Source: UniProtKB-EC magnesium ion binding Source: InterPro NAD binding	leucine biosynthetic process	pep:novel scaffold:IWGSC1.0+popseq:IWGSC_CSS_2AL_scaff_6417141:3818:7236:-1 gene:Traes_2AL_B4C264AB8 transcript:Traes_2AL_B4C264AB8.1	34 kDa	0.41	0.778763	[]
Traes_2BS_6015BC7C6.1 (+1)	copper ion binding Source: GO_Central superoxide dismutase activity Source: TAIR zinc ion binding	cellular response to copper ion Source: TAIR cellular response to light intensity Source: UniProtKB cellular response to oxidative stress Source: UniProtKB cellular response to ozone Source: UniProtKB cellular response to salt stress Source: UniProtKB cellular response to sucrose stimulus Source: UniProtKB cellular response to UV-B Source: UniProtKB defense response to bacterium Source: TAIR gene…	pep:novel chromosome:IWGSC1.0+popseq:2B:34426844:34430270:1 gene:Traes_2BS_6015BC7C6 transcript:Traes_2BS_6015BC7C6.1 description:"copper/zinc superoxide dismutase 1"	15 kDa	0.41	-0.161988	[]
Traes_4AS_98267C6F6.1 (+2)	mRNA binding Source: TAIR structural constituent of ribosome	cytoplasmic translation Source: GO_Central ribosomal small subunit biogenesis Source: GO_Central rRNA processing	pep:novel chromosome:IWGSC1.0+popseq:4A:54363953:54366034:-1 gene:Traes_4AS_98267C6F6 transcript:Traes_4AS_98267C6F6.1	22 kDa	0.41	0.339822	[]
Traes_4AS_ADAE4B86D.2 (+4)	structural constituent of ribosome Source: CAFA threonine-type endopeptidase activity	ubiquitin-dependent protein catabolic process	pep:novel scaffold:IWGSC1.0+popseq:IWGSC_CSS_4AS_scaff_5944160:2844:5504:-1 gene:Traes_4AS_ADAE4B86D transcript:Traes_4AS_ADAE4B86D.2	32 kDa	0.41	0.328712	[]
Traes_4DL_CEEDAF3D9.1	RNA binding Source: GO_Central rRNA binding Source: UniProtKB-KW structural constituent of ribosome	response to cytokinin Source: TAIR ribosomal large subunit assembly Source: GO_Central translation	Ortholog: Ribosomal L5P family protein; FUNCTIONS IN: structural constituent of ribosome; INVOLVED IN: translation	17 kDa	0.41	0.276075	[]
Traes_4DL_E1F977668.1	glutathione transferase activity	glutathione metabolic process Source: GO_Central response to oxidative stress Source: TAIR toxin catabolic process	pep:novel chromosome:IWGSC1.0+popseq:4D:116958125:116959558:-1 gene:Traes_4DL_E1F977668 transcript:Traes_4DL_E1F977668.1	36 kDa	0.41	0.278744	[]
Traes_6AS_52C59C68D.1	threonine-type endopeptidase activity	protein catabolic process Source: TAIR response to arsenic-containing substance Source: TAIR ubiquitin-dependent protein catabolic process	pep:novel chromosome:IWGSC1.0+popseq:6A:20031574:20036234:1 gene:Traes_6AS_52C59C68D transcript:Traes_6AS_52C59C68D.1	31 kDa	0.41	0.316868	[]
[truncated: 718 more rows]

## Sheet: SI2 Table 1 Conan
Conan
[truncated: 1,832 more rows]

## Sheet: SI2 Table 1 Reeder
Reeder
[truncated: 1,832 more rows]

## Sheet: SI2 Table 1 Denali
Denali
[truncated: 1,832 more rows]

## Sheet: SI2 Table 2
SI2 Table 2: Metabolite Quantitation																																											Trt sig.	Cultivar sig.	Conan sig.	Denali sig.	Hatcher sig.	Reeder sig.
[truncated: 1,826 more rows]

[truncated: 2 more sheets: SI2 Table 3, SI2 Table 4 Protein Matrix]
